# Supplementary material
Source: publisher figshare collection journal article supplement (https://acs.figshare.com/ndownloader/files/4528024)

## Supporting Information for

### Ammonium-Directed Oxidation of Cyclic Allylic and Homoallylic Amines

Christopher W. Bond, Alexander J. Cresswell, Stephen G. Davies,\* Ai M. Fletcher, Wataru Kurosawa,  
James A. Lee, Paul M. Roberts, Angela J. Russell, Andrew D. Smith and James E. Thomson

*Department of Chemistry, Chemistry Research Laboratory,  
University of Oxford, Mansfield Road, Oxford OX1 3TA, U.K.*

steve.davies@chem.ox.ac.uk

#### Table of Contents

|                                                       |        |
|-------------------------------------------------------|--------|
| 1. Experimental                                       | 2-53   |
| 2. Copies of $^1\text{H}$ and $^{13}\text{C}$ Spectra | 54-111 |

## 1. Experimental

### General Experimental

*m*CPBA was supplied as a 70-77% slurry in water and titrated according to the procedure of Swern<sup>1</sup> immediately before use. Et<sub>2</sub>O was dried according to the procedure outlined by Grubbs and co-workers.<sup>2</sup> Cl<sub>3</sub>CCO<sub>2</sub>H and TsOH were dried according to the procedure outlined by Armarego and Chai.<sup>3</sup> All other solvents were used as supplied (analytical or HPLC grade) without prior purification. Organic layers were dried over MgSO<sub>4</sub>. Thin layer chromatography was performed on aluminium plates coated with 60 F<sub>254</sub> silica. Plates were visualised using UV light (254 nm), iodine, 1% aq KMnO<sub>4</sub>, or 10% ethanolic phosphomolybdic acid. Flash column chromatography was performed either on Kieselgel 60 silica on a glass column, or on an automated flash column chromatography platform.

Melting points are uncorrected. IR spectra were recorded as either a thin film on NaCl plates (film) or a KBr disc (KBr), as stated. Selected characteristic peaks are reported in cm<sup>-1</sup>. NMR spectra were recorded in the deuterated solvent stated. The field was locked by external referencing to the relevant deuteron resonance. In cases where methylene protons of carbocyclic ring systems could not be unambiguously assigned to a specific carbon atom, the descriptor “CH<sub>2</sub>” is employed throughout. <sup>1</sup>H-<sup>1</sup>H COSY and <sup>1</sup>H-<sup>13</sup>C HMQC analyses were used to establish atom connectivity.

### General Procedure for Transesterification of Acetate and Trichloroacetate Esters

K<sub>2</sub>CO<sub>3</sub> was added to a stirred solution of the requisite trichloroacetate or acetate ester in MeOH or MeOH/THF mixture, as stated, at rt. After 12 h the mixture was concentrated *in vacuo*. The residue was dissolved in Et<sub>2</sub>O (or CH<sub>2</sub>Cl<sub>2</sub>), washed three times with brine, dried and concentrated *in vacuo*.

### Cycloheptene 9

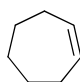

A mixture of bromocycloheptane (38.8 mL, 282 mmol) and powdered KOH (50.0 g, 891 mmol) in EtOH (125 mL) was heated at reflux for 18 h. After being allowed to cool to rt, the mixture was diluted with H<sub>2</sub>O (1 L) and extracted with pentane (300 mL). The organic extracts were dried and concentrated *in vacuo* (300 mbar, 40 °C) to give a 95:5 mixture of **9** and ethylcycloheptyl ether. Purification *via* fractional distillation at

<sup>1</sup> Swern, D. *Org. React.* **1953**, VII, 392.

<sup>2</sup> Pangborn, A. B.; Giardello, M. A.; Grubbs, R. H.; Rosen, R. K.; Timmers, F. J. *Organometallics* **1996**, 15, 1518.

<sup>3</sup> Armarego, W. L. F.; Chai, C. L. L. *Purification of Laboratory Chemicals*, Fifth Edition, Elsevier, 2003.

atmospheric pressure using a 15 cm Vigreux column gave **9** as a colourless oil (16.8 g, 62%) and ethylcycloheptyl ether as a colourless oil (1.90 g, 5%). Data for **9**: bp 112-115 °C (760 mmHg); {lit.<sup>4</sup> bp 113-116 °C (774 mmHg)};  $\delta_{\text{H}}$  (400 MHz,  $\text{CDCl}_3$ ) 1.48-1.56 (4H, m,  $\text{CH}_2$ ), 1.70-1.77 (2H, m,  $\text{CH}_2$ ), 2.09-2.17 (4H, m,  $\text{CH}_2$ ), 5.76-5.84 (2H, m, C(1)*H*, C(2)*H*). Data for ethylcycloheptyl ether: bp 171-180 °C; {lit.<sup>4</sup> bp 172-181 °C (774 mmHg)};  $\nu_{\text{max}}$  (film) 2974, 2928, 2859 (C–H), 1459, 1372, 1089;  $\delta_{\text{H}}$  (400 MHz,  $\text{CDCl}_3$ ) 1.17 (3H, t, *J* 7.1,  $\text{OCH}_2\text{CH}_3$ ), 1.31-1.41 (2H, m,  $\text{CH}_2$ ), 1.48-1.59 (6H, m,  $\text{CH}_2$ ), 1.59-1.69 (2H, m,  $\text{CH}_2$ ), 1.84-1.93 (2H, m,  $\text{CH}_2$ ), 3.35-3.42 (1H, m, C(1)*H*), 3.45 (2H, q, *J* 7.1,  $\text{OCH}_2\text{CH}_3$ );  $\delta_{\text{C}}$  (100 MHz,  $\text{CDCl}_3$ ) 15.7 ( $\text{OCH}_2\text{CH}_3$ ), 23.1, 28.4, 34.0 (C(2)–C(7)), 63.4 ( $\text{OCH}_2\text{CH}_3$ ), 79.9 (C(1)).

### (*RS*)-3-Bromocyclohept-1-ene **12**

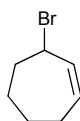

A mixture of **9** (16.8 g, 175 mmol), NBS (31.1 g, 175 mmol) and benzoyl peroxide (70%, 606 mg, 1.75 mmol) in  $\text{CCl}_4$  (112 mL) was heated at reflux for 1 h. The reaction mixture was cooled to 0 °C then filtered through a pad of Celite<sup>®</sup> (eluent  $\text{CCl}_4$ ). The filtrate was washed with 5% aq.  $\text{NaHCO}_3$  (50 mL) then dried and concentrated *in vacuo*. Purification *via* fractional distillation at reduced pressure (1.7 mmHg) using a 10 cm Vigreux column gave **12** as a colourless oil (16.0 g, 52%);<sup>5</sup> bp 42 °C (1.7 mmHg); {lit.<sup>5</sup> bp 59 °C (5.2 mmHg)};  $\delta_{\text{H}}$  (400 MHz,  $\text{CDCl}_3$ ) 1.44-1.55 (1H, m,  $\text{CH}_2$ ), 1.76-1.92 (2H, m,  $\text{CH}_2$ ), 1.95-2.10 (2H, m,  $\text{CH}_2$ ), 2.15-2.27 (3H, m,  $\text{CH}_2$ ), 4.92-4.97 (1H, m, C(3)*H*), 5.82-5.89 (1H, m,  $\text{CH}=\text{CH}$ ), 5.91-5.97 (1H, m,  $\text{CH}=\text{CH}$ ).

### (*RS,Z*)-3-Bromocyclooct-1-ene **13**

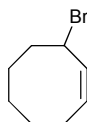

A mixture of **10** (40.0 mL, 309 mmol), NBS (54.8 g, 309 mmol), and benzoyl peroxide (70%, 200 mg, 0.58 mmol) in  $\text{CCl}_4$  (200 mL) was heated at reflux for 1 h. The reaction mixture was cooled to 0 °C then filtered through a pad of Celite<sup>®</sup> (eluent  $\text{CCl}_4$ ). The filtrate was washed with 5% aq.  $\text{NaHCO}_3$  (100 mL) then dried and concentrated *in vacuo*. Purification *via* fractional distillation at reduced pressure (1.6 mmHg) using a 10

<sup>4</sup> Vogel, A. I. *J. Chem. Soc.* **1938**, 1323.

<sup>5</sup> Cope, A. C.; Liss, T. A.; Wood, G. W. *J. Am. Chem. Soc.* **1957**, 79, 6287; Sellén, M.; Bäckvall, J.-E., Helquist, P. *J. Org. Chem.* **1991**, 56, 835.

cm Vigreux column gave **13** as a colourless oil (32.9 g, 56%);<sup>6</sup> bp 59-62 °C (1.6 mmHg); {lit.<sup>6</sup> bp 77-79 °C (5 mmHg)};  $\delta_{\text{H}}$  (400 MHz,  $\text{CDCl}_3$ ) 1.24-1.74 (6H, m,  $\text{CH}_2$ ), 1.93-2.28 (4H, m,  $\text{CH}_2$ ), 4.90-4.98 (1H, m, C(3)*H*), 5.55-5.64 (1H, m,  $\text{CH}=\text{CH}$ ), 5.71-5.83 (1H, m,  $\text{CH}=\text{CH}$ ).

#### (*RS*)-3-(*N,N*-Dibenzylamino)cyclopent-1-ene **14**

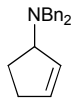

A mixture of **8** (119 mL, 1.35 mol), NBS (60.0 g, 337 mmol) and benzoyl peroxide (70%, 1.17 g, 3.37 mmol) in  $\text{CCl}_4$  (216 mL) was heated at reflux for 1 h. The reaction mixture was cooled to 0 °C then filtered through a pad of Celite<sup>®</sup> (eluent  $\text{CCl}_4$ ) to give a yellow solution. Concentration of an aliquot *in vacuo* gave a 98:1:1 mixture of **11**, *cis*-3,5-dibromocyclopentene, and *trans*-3,5-dibromocyclopentene, respectively.

Data for **11**:<sup>7</sup>  $\delta_{\text{H}}$  (400 MHz,  $\text{CDCl}_3$ ) 2.32-2.43 (3H, m,  $\text{CH}_2$ ), 2.58-2.70 (1H, m,  $\text{CH}_2$ ), 5.17 (1H, d, *J* 2.7, C(3)*H*), 6.00-6.09 (2H, m, C(1)*H*, C(2)*H*).

Data for *cis*-3,5-dibromocyclopentene:<sup>8</sup>  $\delta_{\text{H}}$  (400 MHz,  $\text{CDCl}_3$ ) 2.76 (1H, app d, *J* 16.7, C(4)*H<sub>A</sub>H<sub>B</sub>*), 3.03 (1H, dt, *J* 16.7, 6.8, C(4)*H<sub>A</sub>H<sub>B</sub>*), 5.06 (2H, dt, *J* 6.8, 1.4, C(3)*H*, C(5)*H*), 6.15 (2H, d, *J* 1.4, C(1)*H*, C(2)*H*).

Data for *trans*-3,5-dibromocyclopentene:<sup>9</sup>  $\delta_{\text{H}}$  (400 MHz,  $\text{CDCl}_3$ ) 2.96 (2H, t, *J* 5.1, C(4)*H<sub>2</sub>*), 5.12 (2H, dt, *J* 5.1, 1.0, C(3)*H*, C(5)*H*), 6.11 (2H, d, *J* 1.0, C(1)*H*, C(2)*H*).

Dibenzylamine (162 mL, 843 mmol) was added to the crude solution of bromides at 0 °C and the mixture then warmed to rt and stirred for 30 min. The reaction mixture was then filtered, heated to 40 °C, and stirred at this temperature for 1 h, then filtered and stirred at rt for 12 h. The mixture was then filtered and concentrated *in vacuo*, and the residue was dissolved in  $\text{CH}_2\text{Cl}_2$  (1 L) and washed sequentially with 10% aq. citric acid (3 × 500 mL) and sat. aq.  $\text{NaHCO}_3$  (3 × 500 mL) then concentrated *in vacuo*. The residue was dissolved in 1 M aq. HCl (1 L) and washed with  $\text{Et}_2\text{O}$  (3 × 200 mL). The aqueous layer was then slowly basified to pH >10 by the portionwise addition of solid  $\text{NaHCO}_3$ , then extracted with  $\text{CH}_2\text{Cl}_2$  (3 × 300 mL). The combined organic extracts were dried and concentrated *in vacuo*. Purification *via* flash column chromatography (gradient elution, 1%→5%  $\text{Et}_2\text{O}$  in 30-40 °C petrol) gave **14** as a pale yellow oil (36.3 g, 41%); *R<sub>f</sub>* 0.29 (30-40 °C petrol/ $\text{Et}_2\text{O}$ , 96:4);  $\nu_{\text{max}}$  (film) 3084, 3060, 3027, 2942, 2848, 2798 (C–H), 1715 (C=C), 1602, 1493, 1452;  $\delta_{\text{H}}$  (400 MHz,  $\text{CDCl}_3$ ) 1.92-2.09 (2H, m, C(4)*H<sub>2</sub>*), 2.34-2.58 (2H, m, C(5)*H<sub>2</sub>*),

<sup>6</sup> Cope, A. C.; Estes, J., L. L. *J. Am. Chem. Soc.* **1950**, 72, 1128; Sellén, M.; Bäckvall, J.-E., Helquist, P. *J. Org. Chem* **1991**, 56, 835.

<sup>7</sup> Ikeda, H.; Namai, H.; Taki, H.; Miyashi, T. *J. Org. Chem.* **2005**, 70, 3806.

<sup>8</sup> Begley, M. J.; Madeley, J. P.; Pattenden, G.; Smith, G. F. *J. Chem. Soc. Perkin Trans. 1*, **1992**, 57.

<sup>9</sup> Heasley, G. E.; Heasley, V. L.; Manatt, S. L.; Day, H. A.; Hodges, R. V.; Kroon, P. A.; Redfield, D. A.; Rold, T. L.; Williamson, D. E. *J. Org. Chem.* **1973**, 38, 4109.



3.59 (2H, d,  $J$  14.0,  $N(CH_AH_BPh)_2$ ), 3.81 (2H, d,  $J$  14.0,  $N(CH_AH_BPh)_2$ ), 4.17-4.25 (1H, m, C(3) $H$ ), 5.88-5.95 (1H, m, C(1) $H$ ), 5.99-6.05 (1H, m, C(2) $H$ ), 7.32-7.58 (10H, m,  $Ph$ );  $\delta_C$  (100 MHz,  $CDCl_3$ ) 23.4 (C(4)), 31.9 (C(5)), 54.5 ( $N(CH_2Ph)_2$ ), 66.1 (C(3)), 126.8 ( $p-Ph$ ), 128.3, 128.8 ( $o-$ ,  $m-Ph$ ), 132.1 (C(1)), 133.3 (C(2)), 140.8 ( $i-Ph$ );  $m/z$  (ESI<sup>+</sup>) 264 ( $[M+H]^+$ , 100%); HRMS (ESI<sup>+</sup>)  $C_{19}H_{22}N^+$  ( $[M+H]^+$ ) requires 264.1747; found 264.1747.

**(*RS*)-3-(*N,N*-Dibenzylamino)cyclohept-1-ene 15**

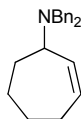

A mixture of **12** (16.0 g, 91.4 mmol), dibenzylamine (43.9 mL, 228 mmol) and  $K_2CO_3$  (15.2 g, 110 mmol) was stirred at 60 °C for 35 h. The mixture was then diluted with  $H_2O$  (1 L) and  $CH_2Cl_2$  (1 L). The organic layer was separated and washed sequentially with 10% aq. citric acid (3 × 500 mL) and sat. aq.  $NaHCO_3$  (500 mL). The resultant solution was dried and concentrated *in vacuo*. Purification *via* recrystallisation ( $i$ PrOH) gave **15** as a white crystalline solid (21.6 g, 81%);<sup>10</sup> mp 54-55 °C ( $i$ PrOH);  $\nu_{max}$  (KBr) 3084, 3062, 3025, 2923, 2851, 2800 (C–H), 1645 (C=C), 1602, 1494, 1453;  $\delta_H$  (400 MHz,  $CDCl_3$ ) 1.26-1.74 (4H, m,  $CH_2$ ), 1.89-2.10 (3H, m,  $CH_2$ ), 2.13-2.23 (1H, m,  $CH_2$ ), 3.35 (1H, app d,  $J$  10.4, C(3) $H$ ), 3.59 (2H, d,  $J$  14.2,  $N(CH_AH_BPh)_2$ ), 3.74 (2H, d,  $J$  14.2,  $N(CH_AH_BPh)_2$ ), 5.80-5.89 (1H, m, C(1) $H$ ), 5.93-6.00 (1H, m, C(2) $H$ ), 7.20-7.42 (10H, m,  $Ph$ );  $\delta_C$  (100 MHz,  $CDCl_3$ ) 26.9, 28.5, 28.5, 28.6 (C(4)-C(7)), 54.0 ( $N(CH_2Ph)_2$ ), 59.0 (C(3)), 126.6 ( $p-Ph$ ), 128.2, 128.6 ( $o-$ ,  $m-Ph$ ), 131.1 (C(1)), 136.2 (C(2)), 140.7 ( $i-Ph$ );  $m/z$  (ESI<sup>+</sup>) 292 ( $[M+H]^+$ , 100%); HRMS (ESI<sup>+</sup>)  $C_{21}H_{26}N^+$  ( $[M+H]^+$ ) requires 292.2060; found 292.2058.

<sup>10</sup> For the preparation of (*S*)-**15**, see: Uozumi, Y.; Tanaka, H.; Shibatomi, K. *Org. Lett.* **2004**, 6, 281.

## X-ray Crystal Structure Determination for **15**

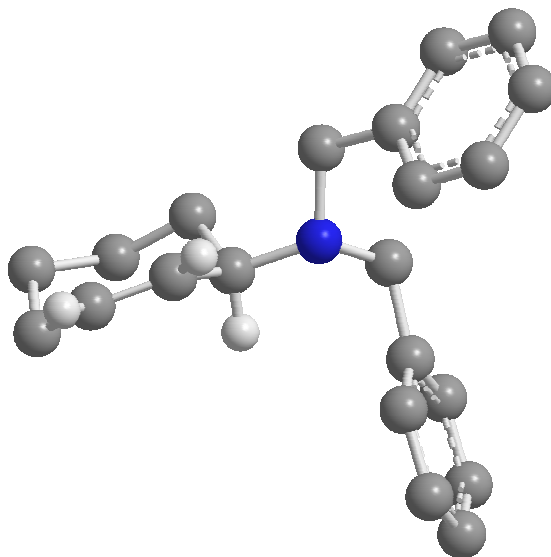

Data were collected using an Enraf-Nonius  $\kappa$ -CCD diffractometer with graphite monochromated Mo- $K\alpha$  radiation using standard procedures at 150 K. The structure was solved by direct methods (SIR92); all non-hydrogen atoms were refined with anisotropic thermal parameters. Hydrogen atoms were added at idealised positions. The structure was refined using CRYSTALS.<sup>11</sup>

X-ray crystal structure data for **15** [C<sub>21</sub>H<sub>25</sub>N]:  $M = 291.44$ , monoclinic, space group  $P 2_1/c$ ,  $a = 15.7454(3)$  Å,  $b = 6.33680(10)$  Å,  $c = 17.3225(4)$  Å,  $\beta = 93.0165(10)^\circ$ ,  $V = 1725.97(6)$  Å<sup>3</sup>,  $Z = 4$ ,  $\mu = 0.064$  mm<sup>-1</sup>, colourless block, crystal dimensions =  $0.3 \times 0.3 \times 0.3$  mm<sup>3</sup>. A total of 3899 unique reflections were measured for  $5 < \theta < 27$  and 2751 reflections were used in the refinement. The final parameters were  $wR_2 = 0.102$  and  $R_1 = 0.048$  [ $I > 3.0\sigma(I)$ ]. Crystallographic data (excluding structure factors) has been deposited with the Cambridge Crystallographic Data Centre as supplementary publication number CCDC 733888. Copies of the data can be obtained, free of charge, on application to CCDC, 12 Union Road, Cambridge, CB2 1EZ, UK [fax: +44(0)-1223-336033 or e-mail: deposit@ccdc.cam.ac.uk].

<sup>11</sup> Betteridge, P. W.; Carruthers, J. R.; Cooper, R. I.; Prout, C. K.; Watkin, D. J. CRYSTALS, 2001, Issue 11, Chemical Crystallography Laboratory, University of Oxford, UK.

## X-ray Crystal Structure Determination for **15•HBr**

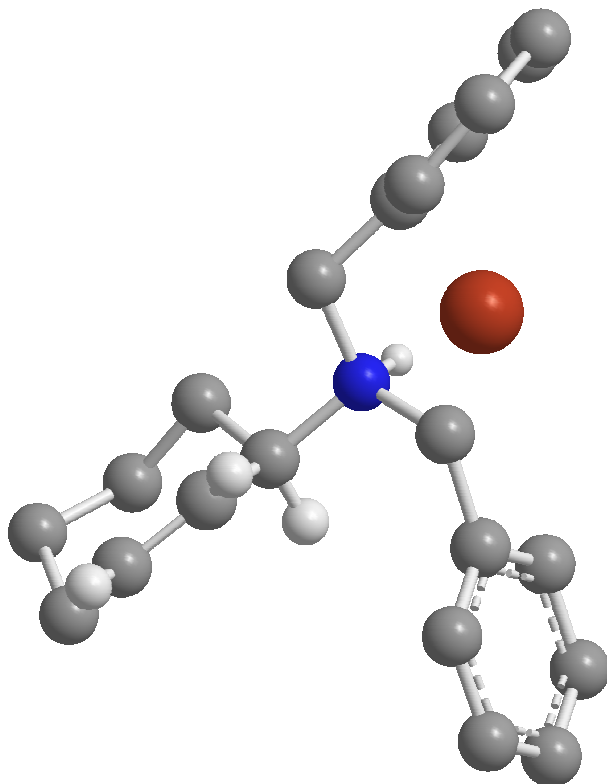

Data were collected using an Enraf-Nonius  $\kappa$ -CCD diffractometer with graphite monochromated Mo- $K\alpha$  radiation using standard procedures at 150 K. The structure was solved by direct methods (SIR92); all non-hydrogen atoms were refined with anisotropic thermal parameters. Hydrogen atoms were added at idealised positions. The structure was refined using CRYSTALS.<sup>11</sup>

X-ray crystal structure data for **15•HBr** [C<sub>21</sub>H<sub>26</sub>BrN]:  $M = 372.35$ , monoclinic, space group  $P 2_1/n$ ,  $a = 10.0731(2)$  Å,  $b = 13.6453(3)$  Å,  $c = 14.6931(4)$  Å,  $\beta = 109.8180(8)^\circ$ ,  $V = 1899.96(8)$  Å<sup>3</sup>,  $Z = 4$ ,  $\mu = 2.16$  mm<sup>-1</sup>, colourless plate, crystal dimensions =  $0.05 \times 0.05 \times 0.2$  mm<sup>3</sup>. A total of 4309 unique reflections were measured for  $5 < \theta < 27$  and 2536 reflections were used in the refinement. The final parameters were  $wR_2 = 0.082$  and  $R_1 = 0.038$  [ $I > 3.0\sigma(I)$ ]. Crystallographic data (excluding structure factors) has been deposited with the Cambridge Crystallographic Data Centre as supplementary publication number CCDC 733889. Copies of the data can be obtained, free of charge, on application to CCDC, 12 Union Road, Cambridge, CB2 1EZ, UK [fax: +44(0)-1223-336033 or e-mail: deposit@ccdc.cam.ac.uk].

## (*RS,Z*)-3-(*N,N*-Dibenzylamino)cyclooct-1-ene **16**

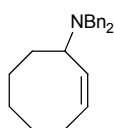

A mixture of **13** (31.1 g, 165 mmol), dibenzylamine (79.0 mL, 412 mmol) and K<sub>2</sub>CO<sub>3</sub> (27.4 g, 198 mmol) was stirred at 60 °C for 35 h. The mixture was then diluted with H<sub>2</sub>O (1 L) and CH<sub>2</sub>Cl<sub>2</sub> (1 L). The organic

layer was separated and washed sequentially with 10% aq. citric acid (3 × 500 mL) and sat. aq. NaHCO<sub>3</sub> (500 mL). The resultant solution was dried and concentrated *in vacuo*. Purification *via* recrystallisation (*i*PrOH) gave **16** as a white crystalline solid (43.2 g, 86%); mp 49-50 °C;  $\nu_{\max}$  (KBr) 3084, 3061, 3025, 2925, 2853, 2799 (C–H), 1644 (C=C), 1603, 1493, 1453;  $\delta_{\text{H}}$  (400 MHz, CDCl<sub>3</sub>) 1.38-1.54 (4H, m, CH<sub>2</sub>), 1.57-1.81 (3H, m, CH<sub>2</sub>), 1.94-2.07 (2H, m, CH<sub>2</sub>), 2.09-2.18 (1H, m, CH<sub>2</sub>), 3.71 (2H, d, *J* 13.8, N(CH<sub>A</sub>H<sub>B</sub>Ph)<sub>2</sub>), 3.80 (1H, ddd, *J* 11.6, 7.3, 3.8, C(3)*H*), 3.97 (2H, d, *J* 13.8, N(CH<sub>A</sub>H<sub>B</sub>Ph)<sub>2</sub>), 5.89-6.00 (2H, m, C(1)*H*, C(2)*H*), 7.35-7.60 (10H, m, *Ph*);  $\delta_{\text{C}}$  (100 MHz, CDCl<sub>3</sub>) 25.1, 26.3, 26.6, 29.4, 33.7 (C(4)-C(8)), 54.7 (N(CH<sub>2</sub>Ph)<sub>2</sub>), 55.8 (C(3)), 126.7 (*p-Ph*), 128.1, 128.7 (*o-*, *m-Ph*), 129.7, 130.8 (C(1), C(2)), 140.8 (*i-Ph*); *m/z* (ESI<sup>+</sup>) 306 ([M+H]<sup>+</sup>, 100%); HRMS (ESI<sup>+</sup>) C<sub>22</sub>H<sub>28</sub>N<sup>+</sup> ([M+H]<sup>+</sup>) requires 306.2216; found 306.2203.

### X-ray Crystal Structure Determination for **16**

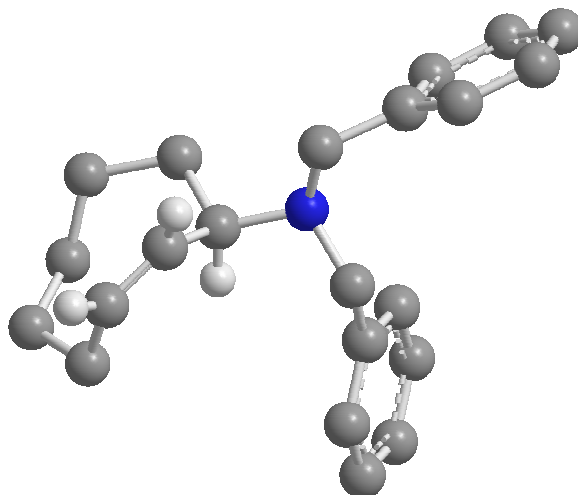

Data were collected using an Enraf-Nonius  $\kappa$ -CCD diffractometer with graphite monochromated Mo-*K* $\alpha$  radiation using standard procedures at 150 K. The structure was solved by direct methods (SIR92); all non-hydrogen atoms were refined with anisotropic thermal parameters. Hydrogen atoms were added at idealised positions. The structure was refined using CRYSTALS.<sup>12</sup>

X-ray crystal structure data for **16** [C<sub>22</sub>H<sub>27</sub>N]: *M* = 305.46, monoclinic, space group *P* 2<sub>1</sub>/*n*, *a* = 10.7783(2) Å, *b* = 14.9377(4) Å, *c* = 11.3867(3) Å,  $\beta$  = 92.8387(10) °, *V* = 1831.04(8) Å<sup>3</sup>, *Z* = 4,  $\mu$  = 0.063 mm<sup>−1</sup>, colourless block, crystal dimensions = 0.2 × 0.2 × 0.2 mm<sup>3</sup>. A total of 4167 unique reflections were measured for 5 <  $\theta$  < 27 and 2409 reflections were used in the refinement. The final parameters were *wR*<sub>2</sub> = 0.145 and *R*<sub>1</sub> = 0.062 [*I* > 3.0 $\sigma$ (*I*)]. Crystallographic data (excluding structure factors) has been deposited with the Cambridge Crystallographic Data Centre as supplementary publication number CCDC 733890. Copies

<sup>12</sup> Betteridge, P. W.; Carruthers, J. R.; Cooper, R. I.; Prout, C. K.; Watkin, D. J. CRYSTALS, 2001, Issue 11, Chemical Crystallography Laboratory, University of Oxford, UK.

of the data can be obtained, free of charge, on application to CCDC, 12 Union Road, Cambridge, CB2 1EZ, UK [fax: +44(0)-1223-336033 or e-mail: deposit@ccdc.cam.ac.uk].

**(1*RS*,2*SR*,3*SR*)-1,2-Epoxy-3-(*N,N*-dibenzylamino)cyclopentane **20****

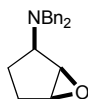

$\text{Cl}_3\text{CCO}_2\text{H}$  (31.0 g, 190 mmol) was added to a stirred solution of **14** (10 g, 38.0 mmol) in  $\text{CH}_2\text{Cl}_2$  (127 mL, 0.3 M w.r.t. **14**) and the resultant mixture was stirred at rt for 5 min. *m*CPBA (73%, 9.43 g, 39.9 mmol) was then added in one portion and the reaction mixture was stirred at rt for 3.5 h. The mixture was diluted with  $\text{CH}_2\text{Cl}_2$  (100 mL) and sat. aq.  $\text{Na}_2\text{SO}_3$  was added until starch-iodide paper indicated no remaining peracid. Sat. aq.  $\text{NaHCO}_3$  (200 mL) was added and the layers were separated. The organic layer was washed with sat. aq.  $\text{NaHCO}_3$  ( $2 \times 200$  mL) then dried, filtered through a short plug of silica gel (eluent  $\text{CH}_2\text{Cl}_2$ ), and concentrated *in vacuo* to give **20** in >99:1 dr. Purification *via* recrystallisation ( $^i\text{PrOH}$ ) gave **20** as a white crystalline solid. Concentration of the mother liquors and purification of the residue *via* flash column chromatography (gradient elution, 1%→8% EtOAc in 40-60 °C petrol) gave **20** as a colourless oil that solidified on standing to a white crystalline solid (10.5 g combined, 99%, >99:1 dr);  $R_f$  0.12 (40-60 °C petrol/EtOAc, 96:4);  $\text{C}_{19}\text{H}_{21}\text{NO}$  requires C, 81.7; H, 7.6; N, 5.0%; found C, 81.5; H, 7.7; N, 4.9%; mp 58-60 °C ( $^i\text{PrOH}$ );  $\nu_{\text{max}}$  (KBr) 3084, 3061, 3027, 2951, 2802 (C–H), 1602, 1494, 1453;  $\delta_{\text{H}}$  (400 MHz,  $\text{CDCl}_3$ ) 1.45-1.59 (3H, m, C(4) $H_{\text{A}}$ , C(5) $H_2$ ), 2.00-2.11 (1H, m, C(4) $H_{\text{B}}$ ), 3.25-3.31 (1H, m, C(3) $H$ ), 3.34 (1H, app d,  $J$  2.7, CH, epoxide), 3.47 (1H, app d,  $J$  2.7, CH, epoxide), 3.74 (2H, d,  $J$  14.3, N(CH $H_{\text{A}}$ H $B$ Ph) $_2$ ), 3.86 (2H, d,  $J$  14.3, N(CH $H_{\text{A}}$ H $B$ Ph) $_2$ ), 7.22-7.46 (10H, m, Ph);  $\delta_{\text{C}}$  (100 MHz,  $\text{CDCl}_3$ ) 17.9 (C(5)), 25.7 (C(4)), 53.7, 55.5, 56.4 (C(1), C(2), N(CH $2$ Ph) $_2$ ), 61.4 (C(3)), 126.8 (*p*-Ph), 128.2, 128.5 (*o*-, *m*-Ph), 140.4 (*i*-Ph);  $m/z$  (ESI $^+$ ) 280 ([M+H] $^+$ , 100%); HRMS (ESI $^+$ )  $\text{C}_{19}\text{H}_{22}\text{NO}^+$  ([M+H] $^+$ ) requires 280.1696; found 280.1692.

## X-ray Crystal Structure Determination for **20**

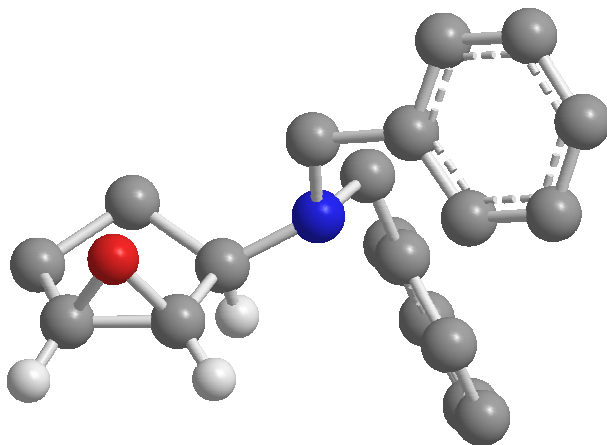

Data were collected using an Enraf-Nonius  $\kappa$ -CCD diffractometer with graphite monochromated Mo- $K\alpha$  radiation using standard procedures at 150 K. The structure was solved by direct methods (SIR92); all non-hydrogen atoms were refined with anisotropic thermal parameters. Hydrogen atoms were added at idealised positions. The structure was refined using CRYSTALS.<sup>13</sup>

X-ray crystal structure data for **20** [C<sub>19</sub>H<sub>21</sub>NO]:  $M = 558.76$ , monoclinic, space group  $P 2_1$ ,  $a = 12.444(3)$  Å,  $b = 7.8733(16)$  Å,  $c = 16.766(3)$  Å,  $\beta = 109.74(3)^\circ$ ,  $V = 1546.1(6)$  Å<sup>3</sup>,  $Z = 4$ ,  $\mu = 0.073$  mm<sup>-1</sup>, colourless block, crystal dimensions =  $0.2 \times 0.2 \times 0.2$  mm<sup>3</sup>. A total of 3651 unique reflections were measured for  $5 < \theta < 27$  and 3651 reflections were used in the refinement. The final parameters were  $wR_2 = 0.214$  and  $R_1 = 0.092$  [ $I > 3.0\sigma(I)$ ]. Crystallographic data (excluding structure factors) has been deposited with the Cambridge Crystallographic Data Centre as supplementary publication number CCDC 733891. Copies of the data can be obtained, free of charge, on application to CCDC, 12 Union Road, Cambridge, CB2 1EZ, UK [fax: +44(0)-1223-336033 or e-mail: deposit@ccdc.cam.ac.uk].

## (1*RS*,2*RS*,3*RS*)-1-Trichloroacetoxy-2-hydroxy-3-(*N,N*-dibenzylamino)cyclopentane **21**

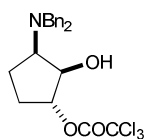

Anhydrous Cl<sub>3</sub>CCO<sub>2</sub>H (292 mg, 1.79 mmol) was added to a stirred solution of **20** (100 mg, 0.36 mmol) in CH<sub>2</sub>Cl<sub>2</sub> (5 mL) and the resultant mixture was heated at 40 °C for 12 h. The mixture was allowed to cool to rt then diluted with CH<sub>2</sub>Cl<sub>2</sub> (15 mL) and washed with sat. aq. NaHCO<sub>3</sub> (3 × 10 mL). The resultant solution was dried and concentrated *in vacuo* to give **21** (>95%), along with trace amounts of unidentifiable species, as a colourless oil, which solidified on standing to a white solid (111 mg, 70%);  $\nu_{\max}$  (film) 3426 (O–H), 3085,

<sup>13</sup> Betteridge, P. W.; Carruthers, J. R.; Cooper, R. I.; Prout, C. K.; Watkin, D. J. CRYSTALS, 2001, Issue 11, Chemical Crystallography Laboratory, University of Oxford, UK.

3062, 3029, 2944, 2848 (C–H), 1767 (C=O), 1602, 1494, 1454;  $m/z$  (ESI<sup>+</sup>) 444 ([M+H]<sup>+</sup>, 100%); HRMS (ESI<sup>+</sup>) C<sub>21</sub>H<sub>23</sub><sup>35</sup>Cl<sub>3</sub>NO<sub>3</sub><sup>+</sup> ([M+H]<sup>+</sup>) requires 442.0738; found 442.0743.

Data for **21**:  $\delta_H$  (400 MHz, CDCl<sub>3</sub>) 1.72 (1H, app ddd,  $J$  14.2, 8.6, 3.0, C(5) $H_A$ ), 1.82 (1H, app t,  $J$  10.7, C(4) $H_A$ ), 1.96-2.06 (1H, m, C(4) $H_B$ ), 2.41-2.52 (1H, m, C(5) $H_B$ ), 3.31 (1H, ddd,  $J$  10.7, 6.8, 4.1, C(3) $H$ ), 3.76 (4H, A<sub>2</sub>, N(CH<sub>2</sub>Ph)<sub>2</sub>), 4.17 (1H, app d,  $J$  4.1, C(2) $H$ ), 5.20 (1H, app dd,  $J$  7.3, 3.0, C(1) $H$ ), 7.25-7.36 (10H, m,  $Ph$ );  $\delta_C$  (100 MHz, CDCl<sub>3</sub>) 26.9, 28.6 (C(4), C(5)), 55.5 (N(CH<sub>2</sub>Ph)<sub>2</sub>), 65.2 (C(3)), 73.9 (C(2)), 83.7 (C(1)), 89.9 (CCl<sub>3</sub>), 127.4 ( $p$ - $Ph$ ), 128.5, 129.0 ( $o$ -,  $m$ - $Ph$ ), 137.9 ( $i$ - $Ph$ ), 161.1 (COCCl<sub>3</sub>).

### (1*RS*,2*RS*,3*RS*)-1-Acetoxy-2-hydroxy-3-(*N,N*-dibenzylamino)cyclopentane **22**

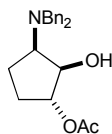

A solution of **20** (5.26 g, 18.8 mmol) in glacial AcOH (53 mL) was stirred at 50 °C for 66 h. The reaction mixture was then allowed to cool to rt and concentrated *in vacuo*. The residue was dissolved in CH<sub>2</sub>Cl<sub>2</sub> (200 mL) and the resultant solution was washed with sat. aq. NaHCO<sub>3</sub> (3 × 200 mL), then dried and concentrated *in vacuo*. Purification *via* recrystallisation (MeOH) gave **22** as a white crystalline solid (5.27 g, 83%, >99:1 dr); C<sub>21</sub>H<sub>25</sub>NO<sub>3</sub> requires C, 74.3; H, 7.4; N, 4.1%; found C, 74.3; H, 7.4; N, 4.15%; mp 121-123 °C (MeOH);  $\nu_{\max}$  (KBr) 3448 (O–H), 3062, 3028, 2944 (C–H), 1734 (C=O), 1602, 1494, 1454;  $\delta_H$  (400 MHz, CDCl<sub>3</sub>) 1.49-1.60 (1H, m, C(5) $H_A$ ), 1.68-1.80 (1H, m, C(4) $H_A$ ), 1.90-1.99 (1H, m, C(4) $H_B$ ), 2.05 (3H, s, COMe), 2.37 (1H, dddd,  $J$  14.3, 9.4, 7.3, 2.4, C(5) $H_B$ ), 3.24 (1H, ddd,  $J$  10.9, 6.8, 4.4, C(3) $H$ ), 3.66 (1H, s, OH), 3.74 (4H, AB system,  $J_{AB}$  14.3, N(CH<sub>2</sub>Ph)<sub>2</sub>), 4.04 (1H, app d,  $J$  4.4, C(2) $H$ ), 5.02 (1H, ddd,  $J$  7.3, 4.4, 1.3, C(1) $H$ ), 7.24-7.37 (10H, m,  $Ph$ );  $\delta_C$  (100 MHz, CDCl<sub>3</sub>) 21.2 (COMe), 26.9, 29.2 (C(4), C(5)), 55.6 (N(CH<sub>2</sub>Ph)<sub>2</sub>), 65.6 (C(3)), 74.5 (C(2)), 79.2 (C(1)), 127.3 ( $p$ - $Ph$ ), 128.5, 129.0 ( $o$ -,  $m$ - $Ph$ ), 138.4 ( $i$ - $Ph$ ), 170.3 (COMe);  $m/z$  (ESI<sup>+</sup>) 340 ([M+H]<sup>+</sup>, 100%); HRMS (ESI<sup>+</sup>) C<sub>21</sub>H<sub>25</sub>NNaO<sub>3</sub><sup>+</sup> ([M+Na]<sup>+</sup>) requires 362.1727; found 362.1726.

## X-ray Crystal Structure Determination for **22•HBF<sub>4</sub>**

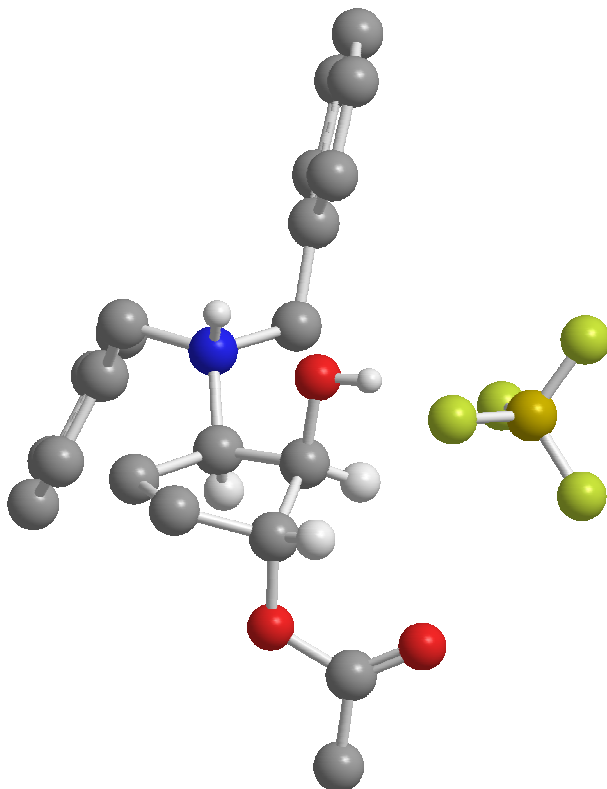

Data were collected using an Enraf-Nonius  $\kappa$ -CCD diffractometer with graphite monochromated Mo- $K\alpha$  radiation using standard procedures at 150 K. The structure was solved by direct methods (SIR92); all non-hydrogen atoms were refined with anisotropic thermal parameters. Hydrogen atoms were added at idealised positions. The structure was refined using CRYSTALS.<sup>14</sup>

X-ray crystal structure data for **22•HBF<sub>4</sub>** [ $\text{C}_{21}\text{H}_{26}\text{BF}_4\text{NO}_3$ ]:  $M = 427.25$ , triclinic, space group  $P\bar{1}$ ,  $a = 8.8068(2) \text{ \AA}$ ,  $b = 10.2538(2) \text{ \AA}$ ,  $c = 11.8459(2) \text{ \AA}$ ,  $\alpha = 106.3042(9)^\circ$ ,  $\beta = 91.0410(8)^\circ$ ,  $\gamma = 95.2761(9)^\circ$ ,  $V = 1021.27(4) \text{ \AA}^3$ ,  $Z = 2$ ,  $\mu = 0.115 \text{ mm}^{-1}$ , colourless plate, crystal dimensions =  $0.3 \times 0.3 \times 0.5 \text{ mm}^3$ . A total of 4629 unique reflections were measured for  $5 < \theta < 27$  and 3546 reflections were used in the refinement. The final parameters were  $wR_2 = 0.051$  and  $R_1 = 0.039$  [ $I > 3.0\sigma(I)$ ]. Crystallographic data (excluding structure factors) has been deposited with the Cambridge Crystallographic Data Centre as supplementary publication number CCDC 733892. Copies of the data can be obtained, free of charge, on application to CCDC, 12 Union Road, Cambridge, CB2 1EZ, UK [fax: +44(0)-1223-336033 or e-mail: deposit@ccdc.cam.ac.uk].

<sup>14</sup> Betteridge, P. W.; Carruthers, J. R.; Cooper, R. I.; Prout, C. K.; Watkin, D. J. CRYSTALS, 2001, Issue 11, Chemical Crystallography Laboratory, University of Oxford, UK.



**(1*RS*,2*RS*,3*RS*)-1-*p*-Toluenesulfonyloxy-2-hydroxy-3-(*N,N*-dibenzylamino)cyclopentane **23****

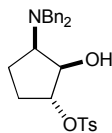

Anhydrous TsOH (664 mg, 3.86 mmol) was added to a stirred solution of **20** (216 mg, 0.77 mmol) in CH<sub>2</sub>Cl<sub>2</sub> (12.8 mL) and the resultant mixture was heated at reflux for 4.5 h. The reaction mixture was then allowed to cool to rt and was diluted with CH<sub>2</sub>Cl<sub>2</sub> (20 mL), washed with sat. aq. NaHCO<sub>3</sub> (3 × 30 mL), then dried and concentrated *in vacuo* to give **23** in >99:1 dr. Purification *via* flash column chromatography (gradient elution, 5%→40% EtOAc in 30-40 °C petrol) gave **23** as a colourless gum (305 mg, 88%, >99:1 dr); *R<sub>f</sub>* 0.25 (30-40 °C petrol/EtOAc, 80:20); *v*<sub>max</sub> (film) 3412 (O–H), 3062, 3028, 2946, 2828 (C–H), 1599, 1494, 1454, 1362 (S=O), 1190 (C–O), 1177 (S=O); *δ*<sub>H</sub> (400 MHz, CDCl<sub>3</sub>) 1.61-1.79 (2H, m, C(4)*H<sub>A</sub>*, C(5)*H<sub>A</sub>*), 1.90-2.00 (1H, m, C(4)*H<sub>B</sub>*), 2.20-2.30 (1H, m, C(5)*H<sub>B</sub>*), 2.46 (3H, s, *ArMe*), 3.26 (1H, ddd, *J* 10.6, 6.8, 4.3, C(3)*H*), 3.66 (2H, d, *J* 14.2, N(CH<sub>A</sub>H<sub>B</sub>Ph)<sub>2</sub>), 3.72 (2H, d, *J* 14.2, N(CH<sub>A</sub>H<sub>B</sub>Ph)<sub>2</sub>), 4.04 (1H, app d, *J* 4.3, C(2)*H*), 4.71 (1H, app dd, *J* 7.1, 2.5, C(1)*H*), 7.20-7.38 (12H, m, *Ar*, *Ph*), 7.79-7.84 (2H, m, *Ar*); *δ*<sub>C</sub> (100 MHz, CDCl<sub>3</sub>) 21.7 (*ArMe*), 26.7, 29.4 (C(4), C(5)), 55.6 (N(CH<sub>2</sub>Ph)<sub>2</sub>), 65.3 (C(3)), 74.3 (C(2)), 85.8 (C(1)), 127.4, 127.9, 128.5, 129.0, 130.0, 133.7, 138.1, 144.9 (*Ar*, *Ph*); *m/z* (ESI<sup>+</sup>) 452 ([M+H]<sup>+</sup>, 100%); HRMS (ESI<sup>+</sup>) C<sub>26</sub>H<sub>30</sub>NO<sub>4</sub>S<sup>+</sup> ([M+H]<sup>+</sup>) requires 452.1890; found 452.1888.

**(1*RS*,2*RS*,3*RS*)-3-(*N,N*-Dibenzylamino)cyclopentane-1,2-diol **24****

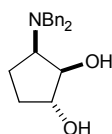

*From 20*: 3 M aq. H<sub>2</sub>SO<sub>4</sub> (3 mL) was added to a stirred solution of **20** (500 mg, 1.79 mmol) in THF (9 mL) and the resultant mixture was stirred at 40 °C for 20 h. The reaction mixture was then allowed to cool to rt and was concentrated *in vacuo*. The residue was dissolved in Et<sub>2</sub>O (50 mL) and washed with sat. aq. NaHCO<sub>3</sub> (3 × 20 mL), then dried and concentrated *in vacuo* to give a 96:4 mixture of **24:35**. Purification *via* flash column chromatography (eluent 40-60 °C petrol/EtOAc, 50:50) gave a 96:4 mixture of **24:35** as a colourless oil which solidified on standing to a white crystalline solid (504 mg, 96%).

*From 21*: Following the *General Procedure*, K<sub>2</sub>CO<sub>3</sub> (152 mg, 1.1 mmol) and **21** (97 mg, 0.22 mmol) in MeOH (2 mL) gave a 97:3 mixture of **24:35**. Purification *via* flash column chromatography (eluent 40-60 °C petrol/EtOAc, 50:50) gave a 97:3 mixture of **24:35** as a colourless oil which solidified on standing to a white crystalline solid (58 mg, 89%).

From **22**: following the *General Procedure*, K<sub>2</sub>CO<sub>3</sub> (1.63 g, 11.8 mmol) and **22** (800 mg, 2.36 mmol) in MeOH (8 mL) gave, after purification *via* flash column chromatography (gradient elution, 12%→100% EtOAc in 40-60 °C petrol), **24** as a colourless oil which solidified on standing to a white crystalline solid (678 mg, 97%, >99:1 dr); *R*<sub>f</sub> 0.21 (40-60 °C petrol/EtOAc, 50:50); mp 65-67 °C;  $\nu_{\max}$  (KBr) 3400 (O–H), 3085, 3062, 3028, 2938 (C–H), 1602, 1494, 1453;  $\delta_{\text{H}}$  (400 MHz, CDCl<sub>3</sub>) 1.51 (1H, dddd, *J* 13.7, 9.1, 9.0, 4.0, C(5)*H*<sub>A</sub>), 1.66-1.77 (1H, m, C(4)*H*<sub>A</sub>), 1.92-2.01 (1H, m, C(4)*H*<sub>B</sub>), 2.27 (1H, dddd, *J* 13.7, 9.4, 7.1, 2.4, C(5)*H*<sub>B</sub>), 3.30-3.37 (1H, m, C(3)*H*), 3.37 (4H, A<sub>2</sub>, N(CH<sub>2</sub>Ph)<sub>2</sub>), 3.91 (1H, app d, *J* 4.3, C(2)*H*), 4.19-4.24 (1H, m, C(1)*H*), 7.22-7.34 (10H, m, *Ph*);  $\delta_{\text{C}}$  (100 MHz, CDCl<sub>3</sub>) 26.9 (C(4)), 31.4 (C(5)), 55.7 (N(CH<sub>2</sub>Ph)<sub>2</sub>), 65.5 (C(3)), 77.0 (C(1)), 77.2 (C(2)), 127.2 (*p-Ph*), 128.4, 129.0 (*o-*, *m-Ph*), 138.5 (*i-Ph*); *m/z* (ESI<sup>+</sup>) 298 ([M+H]<sup>+</sup>, 100%); HRMS (ESI<sup>+</sup>) C<sub>19</sub>H<sub>24</sub>NO<sub>2</sub><sup>+</sup> ([M+H]<sup>+</sup>) requires 298.1802; found 298.1810.

**(1*RS*,2*SR*,3*RS*)-1,2-Epoxy-3-(*N,N*-dibenzylamino)cyclooctane **25****

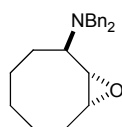

Cl<sub>3</sub>CCO<sub>2</sub>H (26.7 g, 164 mmol) was added to a stirred solution of **16** (10 g, 32.7 mmol) in CH<sub>2</sub>Cl<sub>2</sub> (109 mL, 0.3 M w.r.t. **16**) and the resultant mixture was stirred at rt for 5 min. *m*CPBA (74%, 8.02 g, 34.4 mmol) was then added in one portion and the reaction mixture was stirred at rt for 3.5 h. The mixture was diluted with CH<sub>2</sub>Cl<sub>2</sub> (100 mL) and sat. aq. Na<sub>2</sub>SO<sub>3</sub> was added until starch-iodide paper indicated no remaining peracid. Sat. aq. NaHCO<sub>3</sub> (200 mL) was added and the layers were separated. The organic layer was washed with sat. aq. NaHCO<sub>3</sub> (2 × 200 mL) then dried, filtered through a short plug of silica gel (eluent CH<sub>2</sub>Cl<sub>2</sub>), and concentrated *in vacuo* to give **25** as a white crystalline solid (10.4 g, quant, >99:1 dr); mp 103-105 °C (EtOH);  $\nu_{\max}$  (KBr) 2972, 2926, 2854 (C–H), 1602, 1493, 1454;  $\delta_{\text{H}}$  (400 MHz, CDCl<sub>3</sub>) 0.85-0.99 (1H, m, C(8)*H*<sub>A</sub>), 1.11-1.21 (1H, m, CH<sub>2</sub>), 1.34-1.61 (5H, m, CH<sub>2</sub>), 1.65-1.75 (2H, m, C(4)*H*<sub>2</sub>), 2.10 (1H, app dq, *J* 13.7, 3.9, C(8)*H*<sub>B</sub>), 2.68 (1H, app td, *J* 9.5, 6.7, C(3)*H*), 2.89 (1H, app dt, *J* 10.4, 4.4, C(1)*H*), 3.08 (1H, dd, *J* 9.5, 4.4, C(2)*H*), 3.79 (4H, AB system, *J*<sub>AB</sub> 13.7, N(CH<sub>2</sub>Ph)<sub>2</sub>), 7.19-7.46 (10H, m, *Ph*);  $\delta_{\text{C}}$  (100 MHz, CDCl<sub>3</sub>) 25.2, 25.5, 26.8, 27.1, 31.2 (C(4)–C(8)), 53.4 (C(1)), 54.6 (N(CH<sub>2</sub>Ph)<sub>2</sub>), 55.7 (C(2)), 55.8 (C(3)), 126.7 (*p-Ph*), 128.1, 128.7 (*o-*, *m-Ph*), 140.5 (*i-Ph*); *m/z* (ESI<sup>+</sup>) 322 ([M+H]<sup>+</sup>, 100%); HRMS (ESI<sup>+</sup>) C<sub>22</sub>H<sub>28</sub>NO<sup>+</sup> ([M+H]<sup>+</sup>) requires 322.2165; found 322.2161.

## X-ray Crystal Structure Determination for **25**

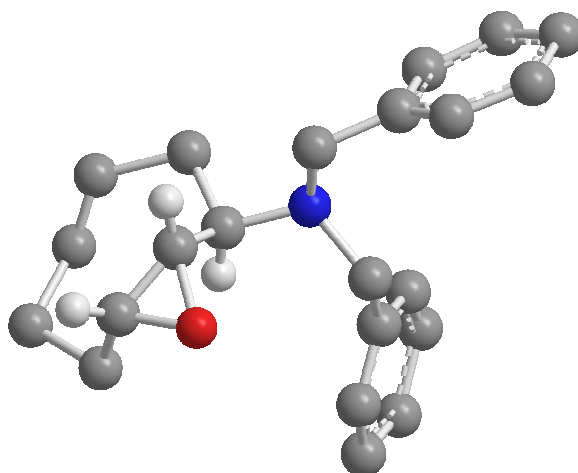

Data were collected using an Enraf-Nonius  $\kappa$ -CCD diffractometer with graphite monochromated Mo- $K\alpha$  radiation using standard procedures at 150 K. The structure was solved by direct methods (SIR92); all non-hydrogen atoms were refined with anisotropic thermal parameters. Hydrogen atoms were added at idealised positions. The structure was refined using CRYSTALS.<sup>15</sup>

X-ray crystal structure data for **25** [C<sub>22</sub>H<sub>27</sub>NO]:  $M = 642.93$ , monoclinic, space group  $P 2_1/c$ ,  $a = 14.8507(4)$  Å,  $b = 14.8824(4)$  Å,  $c = 16.6996(4)$  Å,  $\beta = 94.0401(18)^\circ$ ,  $V = 3681.67(17)$  Å<sup>3</sup>,  $Z = 8$ ,  $\mu = 0.070$  mm<sup>-1</sup>, colourless plate, crystal dimensions =  $0.2 \times 0.2 \times 0.3$  mm<sup>3</sup>. A total of 8288 unique reflections were measured for  $5 < \theta < 27$  and 3748 reflections were used in the refinement. The final parameters were  $wR_2 = 0.133$  and  $R_1 = 0.151$  [ $I > 3.0\sigma(I)$ ]. Crystallographic data (excluding structure factors) has been deposited with the Cambridge Crystallographic Data Centre as supplementary publication number CCDC 733893. Copies of the data can be obtained, free of charge, on application to CCDC, 12 Union Road, Cambridge, CB2 1EZ, UK [fax: +44(0)-1223-336033 or e-mail: deposit@ccdc.cam.ac.uk].

## (*RS,Z*)-3-(*N,N*-Dibenzyl-*N*-methylammonio)cyclooct-1-ene trifluoromethanesulfonate **26**

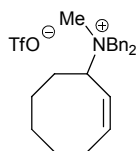

MeOTf (207  $\mu$ L, 1.83 mmol) was added to a solution of **16** (559 mg, 1.83 mmol) in anhydrous Et<sub>2</sub>O (5 mL) and the resultant mixture was stirred at rt for 2 h. The precipitate was collected *via* filtration and dissolved in CH<sub>2</sub>Cl<sub>2</sub> (5 mL), then washed with sat. aq. NaHCO<sub>3</sub> (2  $\times$  5 mL) and concentrated *in vacuo*. The residue was triturated with Et<sub>2</sub>O and the precipitate was collected *via* filtration and dried *in vacuo* to give **26** as a white

<sup>15</sup> Betteridge, P. W.; Carruthers, J. R.; Cooper, R. I.; Prout, C. K.; Watkin, D. J. CRYSTALS, 2001, Issue 11, Chemical Crystallography Laboratory, University of Oxford, UK.

crystalline solid (202 mg, 23%); mp 131-133 °C (Et<sub>2</sub>O);  $\nu_{\text{max}}$  (KBr) 3013, 2935, 2860 (C–H), 1255, 1153 (S=O);  $\delta_{\text{H}}$  (400 MHz, CDCl<sub>3</sub>) 1.17-1.35 (2H, m, CH<sub>2</sub>), 1.44-1.66 (5H, m, CH<sub>2</sub>), 1.70-1.83 (1H, m, CH<sub>2</sub>), 1.98-2.10 (1H, m, CH<sub>2</sub>), 2.41-2.53 (1H, m, CH<sub>2</sub>), 2.82 (3H, s, NMe), 4.08 (1H, ddd, *J* 12.0, 8.7, 3.0, C(3)*H*), 4.42 (1H, d, *J* 13.1, N(CH<sub>A</sub>H<sub>B</sub>Ph)<sub>A</sub>), 4.49 (1H, d, *J* 12.9, N(CH<sub>A</sub>H<sub>B</sub>Ph)<sub>B</sub>), 4.66 (1H, d, *J* 12.9, N(CH<sub>A</sub>H<sub>B</sub>Ph)<sub>B</sub>), 4.91 (1H, d, *J* 13.1, N(CH<sub>A</sub>H<sub>B</sub>Ph)<sub>A</sub>), 5.94-6.10 (2H, m, C(1)*H*, C(2)*H*), 7.35-7.58 (10H, m, *Ph*);  $\delta_{\text{C}}$  (100 MHz, CDCl<sub>3</sub>)<sup>16</sup> 24.3, 25.8, 26.6, 28.5, 28.9 (C(4)–C(8)), 46.8 (NMe), 63.0 (N(CH<sub>2</sub>Ph)<sub>2</sub>), 69.2 (C(3)), 121.6 (C(2)), 126.9, 127.0 (*i-Ph*), 129.3, 129.4, 130.7, 130.9, 133.2, 133.3 (*o-*, *m-*, *p-Ph*), 136.5 (C(1)); *m/z* (ESI<sup>+</sup>) 320 ([M–OTf]<sup>+</sup>, 100%); HRMS (ESI<sup>+</sup>) C<sub>23</sub>H<sub>30</sub>N<sup>+</sup> ([M–OTf]<sup>+</sup>) requires 320.2373; found 320.2377.

### (1*RS*,2*SR*,3*RS*)-1,2-Epoxy-3-(*N,N*-dibenzyl-*N*-methylammonio)cyclooctane trifluoromethanesulfonate

**27**

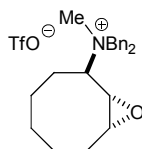

*From 25*: MeOTf (195  $\mu$ L, 1.72 mmol) was added to a solution of **25** (553 mg, 1.72 mmol) in anhydrous Et<sub>2</sub>O (5 mL) and the resultant mixture was stirred at rt for 2 h. The precipitate was collected *via* filtration and dissolved in CH<sub>2</sub>Cl<sub>2</sub> (5 mL), then washed with sat. aq. NaHCO<sub>3</sub> (2  $\times$  5 mL) and concentrated *in vacuo*. The residue was triturated with Et<sub>2</sub>O and the precipitate was collected *via* filtration and dried *in vacuo* to give **27** as a white crystalline solid (64 mg, 8%, >98% de); mp 186-188 °C (Et<sub>2</sub>O);  $\nu_{\text{max}}$  (KBr) 3015, 2938, 2867 (C–H), 1253, 1153 (S=O);  $\delta_{\text{H}}$  (400 MHz, CDCl<sub>3</sub>) 0.58-0.72 (1H, m, CH<sub>2</sub>), 1.21-1.57 (5H, m, CH<sub>2</sub>), 1.65-1.79 (1H, m, CH<sub>2</sub>), 1.88-2.10 (2H, m, CH<sub>2</sub>), 2.66-2.78 (1H, m, CH<sub>2</sub>), 2.87 (3H, s, NMe), 2.99-3.10 (2H, m, C(1)*H*, C(3)*H*), 3.55 (1H, dd, *J* 9.4, 4.6, C(2)*H*), 4.24 (1H, d, *J* 13.5, N(CH<sub>A</sub>H<sub>B</sub>Ph)<sub>A</sub>), 4.79 (1H, d, *J* 12.6, N(CH<sub>A</sub>H<sub>B</sub>Ph)<sub>B</sub>), 4.91 (1H, d, *J* 12.6, N(CH<sub>A</sub>H<sub>B</sub>Ph)<sub>B</sub>), 5.19 (1H, d, *J* 13.5, N(CH<sub>A</sub>H<sub>B</sub>Ph)<sub>A</sub>), 7.31-7.49 (10H, m, *Ph*);  $\delta_{\text{C}}$  (100 MHz, CDCl<sub>3</sub>)<sup>17</sup> 25.5, 25.8, 27.1 (C(4)–C(8)), 47.2 (NMe), 51.5, 55.7 (C(1), C(2)), 62.7 (N(CH<sub>2</sub>Ph)<sub>A</sub>), 64.2 (N(CH<sub>2</sub>Ph)<sub>B</sub>), 71.8 (C(3)), 126.7, 127.0 (*i-Ph*), 129.3, 129.4, 130.7, 131.0, 132.8, 133.7 (*o-*, *m-*, *p-Ph*); *m/z* (ESI<sup>+</sup>) 336 ([M–OTs]<sup>+</sup>, 100%); HRMS (ESI<sup>+</sup>) C<sub>23</sub>H<sub>30</sub>NO<sup>+</sup> ([M–OTs]<sup>+</sup>) requires 336.2322; found 336.2322.

*From 26*: Cl<sub>3</sub>CCO<sub>2</sub>H (177 mg, 1.08 mmol) was added to a solution of **26** (102 mg, 0.22 mmol) in CH<sub>2</sub>Cl<sub>2</sub> (0.73 mL, 0.3 M w.r.t. **26**) and the resultant mixture was stirred at rt for 5 min. *m*CPBA (69%, 56.8 mg, 0.23

<sup>16</sup> The quartet associated with the CF<sub>3</sub> group was not observed within the <sup>13</sup>C NMR spectrum of **26** due to low signal intensity.

<sup>17</sup> The quartet associated with the CF<sub>3</sub> group was not observed within the <sup>13</sup>C NMR spectrum of **27** due to low signal intensity.

mmol) was then added in one portion and the reaction mixture was stirred at rt for 3.5 h. The mixture was then diluted with CH<sub>2</sub>Cl<sub>2</sub> and sat. aq. Na<sub>2</sub>SO<sub>3</sub> was added until starch-iodide paper indicated no remaining peracid. Sat. aq. NaHCO<sub>3</sub> (5 mL) was then added and the layers separated. The organic layer was washed with sat. aq. NaHCO<sub>3</sub> (2 × 5 mL), then dried and concentrated *in vacuo* to give 4% conversion to a 96:4 mixture of **26:27** as a colourless gum (103 mg).

**(1*RS*,2*SR*,3*RS*)- and (1*RS*,2*SR*,3*SR*)-1,2-Epoxy-3-(*N,N*-dibenzylamino)cycloheptane **28** and **29****

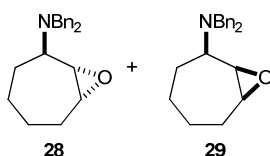

Cl<sub>3</sub>CCO<sub>2</sub>H (5.74 g, 35.2 mmol) was added to a stirred solution of **15** (2.05 g, 7.03 mmol) in CH<sub>2</sub>Cl<sub>2</sub> (23 mL, 0.3 M w.r.t. **15**) and the resultant mixture was stirred at rt for 5 min. *m*CPBA (74%, 1.72 g, 7.38 mmol) was then added in one portion and the reaction mixture was stirred at rt for 3.5 h. The mixture was diluted with CH<sub>2</sub>Cl<sub>2</sub> (25 mL) and sat. aq. Na<sub>2</sub>SO<sub>3</sub> was added until starch-iodide paper indicated no remaining peracid. Sat. aq. NaHCO<sub>3</sub> (25 mL) was added and the layers were separated. The organic layer was washed with sat. aq. NaHCO<sub>3</sub> (2 × 25 mL) then dried, filtered through a short plug of silica gel (eluent CH<sub>2</sub>Cl<sub>2</sub>), and concentrated *in vacuo* to give a 94:6 mixture of **28:29**. Purification *via* flash column chromatography (gradient elution, 2%→20% Et<sub>2</sub>O in 40-60 °C petrol) gave **29** as a colourless oil which solidified on standing to a white crystalline solid (94 mg, 4%, >99:1 dr); *R*<sub>f</sub> 0.28 (40-60 °C petrol:Et<sub>2</sub>O, 90:10); mp 53-55 °C; *v*<sub>max</sub> (film) 3084, 3062, 3027, 2926, 2849, 2803 (C–H), 1603, 1494, 1453; *δ*<sub>H</sub> (400 MHz, CDCl<sub>3</sub>) 0.59-0.70 (1H, m, CH<sub>2</sub>), 1.26-1.65 (4H, m, CH<sub>2</sub>), 1.74-1.82 (1H, m, CH<sub>2</sub>), 1.84-1.91 (1H, m, CH<sub>2</sub>), 2.22-2.31 (1H, m, CH<sub>2</sub>), 2.89 (1H, app dd, *J* 11.6, 2.8, C(1)*H*), 3.06 (1H, app t, *J* 5.3, C(3)*H*), 3.35 (1H, dd, *J* 4.8, 1.0, C(2)*H*), 3.59 (2H, d, *J* 13.9, N(CH<sub>A</sub>H<sub>B</sub>Ph)<sub>2</sub>), 3.90 (2H, d, *J* 13.9, N(CH<sub>A</sub>H<sub>B</sub>Ph)<sub>2</sub>), 7.21-7.42 (10H, m, *Ph*); *δ*<sub>C</sub> (100 MHz, CDCl<sub>3</sub>) 23.4, 24.1, 27.1, 28.0 (C(4)–C(7)), 53.3 (C(3)), 54.3 (N(CH<sub>2</sub>Ph)<sub>2</sub>), 58.4 (C(1)), 60.7 (C(2)), 126.7 (*p-Ph*), 128.1, 128.5 (*o-, m-Ph*), 140.4 (*i-Ph*); *m/z* (ESI<sup>+</sup>) 308 ([M+H]<sup>+</sup>, 100%); HRMS (ESI<sup>+</sup>) C<sub>21</sub>H<sub>26</sub>NO<sup>+</sup> ([M+H]<sup>+</sup>) requires 308.2009; found 308.2005. Further elution gave **28** as a colourless oil which solidified on standing to a white crystalline solid (1.49 g, 69%, >99:1 dr); *R*<sub>f</sub> 0.17 (40-60 °C petrol/Et<sub>2</sub>O, 90:10); mp 69-70 °C; *v*<sub>max</sub> (KBr) 3084, 3061, 3028, 2926, 2851, 2804 (C–H), 1602, 1494, 1454; *δ*<sub>H</sub> (400 MHz, CDCl<sub>3</sub>) 1.02-1.12 (1H, m, C(7)*H*<sub>A</sub>), 1.15-1.34 (2H, m, CH<sub>2</sub>), 1.60-1.73 (2H, m, C(4)*H*<sub>2</sub>), 1.83-1.92 (2H, m, CH<sub>2</sub>), 2.22 (1H, app ddd, *J* 13.7, 6.8, 6.5, C(7)*H*<sub>B</sub>), 2.66 (1H, app dd, *J* 10.4, 7.5, C(3)*H*), 3.00 (1H, ddd, *J* 8.0, 6.5, 5.0, C(1)*H*), 3.24 (1H, dd, *J* 7.5, 5.0, C(2)*H*), 3.77 (4H, AB system, *J*<sub>AB</sub> 13.9, N(CH<sub>2</sub>Ph)<sub>2</sub>), 7.21-7.46 (10H, m,

*Ph*);  $\delta_{\text{C}}$  (100 MHz,  $\text{CDCl}_3$ ) 24.0, 29.3, 29.8, 31.2 (*C*(4)-*C*(7)), 52.7 (*C*(3)), 54.6 ( $\text{N}(\text{CH}_2\text{Ph})_2$ ), 55.6 (*C*(1)), 60.7 (*C*(2)), 126.8 (*p-Ph*), 128.1, 128.8 (*o-*, *m-Ph*), 140.1 (*i-Ph*);  $m/z$  ( $\text{ESI}^+$ ) 308 ( $[\text{M}+\text{H}]^+$ , 100%); HRMS ( $\text{ESI}^+$ )  $\text{C}_{21}\text{H}_{26}\text{NO}^+$  ( $[\text{M}+\text{H}]^+$ ) requires 308.2009; found 308.2006.

### X-ray Crystal Structure Determination for **28**

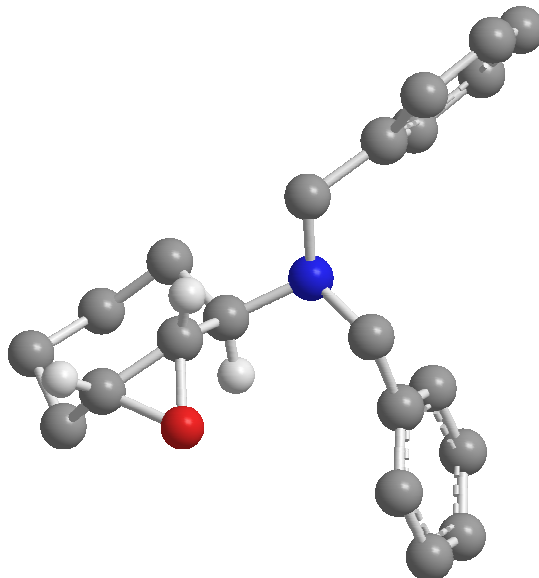

Data were collected using an Enraf-Nonius  $\kappa$ -CCD diffractometer with graphite monochromated  $\text{Mo-K}\alpha$  radiation using standard procedures at 150 K. The structure was solved by direct methods (SIR92); all non-hydrogen atoms were refined with anisotropic thermal parameters. Hydrogen atoms were added at idealised positions. The structure was refined using CRYSTALS.<sup>18</sup>

X-ray crystal structure data for **28** [ $\text{C}_{21}\text{H}_{25}\text{NO}$ ]:  $M = 307.44$ , monoclinic, space group  $P 2_1/c$ ,  $a = 9.6786(2)$  Å,  $b = 15.6935(4)$  Å,  $c = 11.6781(4)$  Å,  $\beta = 92.0417(10)^\circ$ ,  $V = 1772.67(8)$  Å<sup>3</sup>,  $Z = 4$ ,  $\mu = 0.070$  mm<sup>-1</sup>, colourless block, crystal dimensions =  $0.1 \times 0.1 \times 0.1$  mm<sup>3</sup>. A total of 4010 unique reflections were measured for  $5 < \theta < 27$  and 1988 reflections were used in the refinement. The final parameters were  $wR_2 = 0.035$  and  $R_1 = 0.034$  [ $I > 3.0\sigma(I)$ ]. Crystallographic data (excluding structure factors) has been deposited with the Cambridge Crystallographic Data Centre as supplementary publication number CCDC 733894. Copies of the data can be obtained, free of charge, on application to CCDC, 12 Union Road, Cambridge, CB2 1EZ, UK [fax: +44(0)-1223-336033 or e-mail: deposit@ccdc.cam.ac.uk].

<sup>18</sup> Betteridge, P. W.; Carruthers, J. R.; Cooper, R. I.; Prout, C. K.; Watkin, D. J. CRYSTALS, 2001, Issue 11, Chemical Crystallography Laboratory, University of Oxford, UK.

**(*RS*)-3-(*N,N*-Dibenzyl-*N*-methyllummonio)cyclohept-1-ene trifluoromethanesulfonate **30****

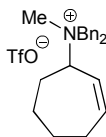

MeOTf (191  $\mu$ L, 1.68 mmol) was added to a solution of **15** (491 mg, 1.68 mmol) in anhydrous Et<sub>2</sub>O (5 mL) and the resultant mixture was stirred at rt for 2 h. The precipitate was collected *via* filtration and dissolved in CH<sub>2</sub>Cl<sub>2</sub> (5 mL), then washed with sat. aq. NaHCO<sub>3</sub> (2  $\times$  5 mL) and concentrated *in vacuo*. The residue was triturated with Et<sub>2</sub>O and the precipitate was collected *via* filtration and dried *in vacuo* to give **30** as a white crystalline solid (164 mg, 21%); mp 135-137  $^{\circ}$ C;  $\nu_{\text{max}}$  (KBr) 3014, 2941, 2858 (C–H), 1256, 1153 (S=O);  $\delta_{\text{H}}$  (400 MHz, CDCl<sub>3</sub>) 1.13-1.27 (1H, m, CH<sub>2</sub>), 1.39-1.53 (1H, m, CH<sub>2</sub>), 1.54-1.72 (2H, m, CH<sub>2</sub>), 1.79-1.91 (1H, m, CH<sub>2</sub>), 2.07-2.25 (2H, m, CH<sub>2</sub>), 2.46 (1H, app d, *J* 13.4, CH<sub>2</sub>), 2.91 (3H, s, NMe), 3.84 (1H, dd, *J* 10.7, 4.2, C(3)*H*), 4.38 (1H, d, *J* 13.1, N(CH<sub>A</sub>H<sub>B</sub>Ph)<sub>A</sub>), 4.52 (1H, d, *J* 13.1, N(CH<sub>A</sub>H<sub>B</sub>Ph)<sub>B</sub>), 4.76 (1H, d, *J* 13.1, N(CH<sub>A</sub>H<sub>B</sub>Ph)<sub>A</sub>), 4.81 (1H, d, *J* 13.1, N(CH<sub>A</sub>H<sub>B</sub>Ph)<sub>B</sub>), 6.14-6.23 (1H, m, C(1)*H*), 6.38-6.48 (1H, m, C(2)*H*), 7.35-7.61 (10H, m, *Ph*);  $\delta_{\text{C}}$  (100 MHz, CDCl<sub>3</sub>)<sup>19</sup> 24.2, 27.0, 27.2, 28.6 (C(4)-C(7)), 46.5 (NMe), 62.8 (N(CH<sub>2</sub>Ph)<sub>A</sub>), 63.0 (N(CH<sub>2</sub>Ph)<sub>B</sub>), 71.1 (C(3)), 126.0 (C(2)), 126.6, 126.8 (*i-Ph*), 129.3, 129.4, 130.8, 130.8, 133.1, 133.4 (*o*-, *m*-, *p-Ph*), 135.6 (C(1)); *m/z* (ESI<sup>+</sup>) 306 ([M–OTf]<sup>+</sup>, 100%); HRMS (ESI<sup>+</sup>) C<sub>22</sub>H<sub>28</sub>N<sup>+</sup> ([M–OTf]<sup>+</sup>) requires 306.2216; found 306.2218.

**(1*RS*,2*SR*,3*RS*)- and (1*RS*,2*SR*,3*SR*)-1,2-Epoxy-3-(*N,N*-dibenzyl-*N*-methyllummonio)cycloheptane trifluoromethanesulfonate **31** and **32****

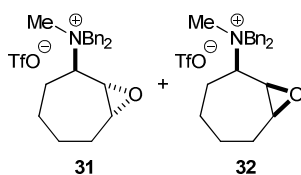

*From 28*: MeOTf (166  $\mu$ L, 1.47 mmol) was added to a solution of **28** (452 mg, 1.47 mmol) in anhydrous Et<sub>2</sub>O (5 mL) and the resultant mixture was stirred at rt for 2 h. The precipitate was collected *via* filtration and dissolved in CH<sub>2</sub>Cl<sub>2</sub> (5 mL), then washed with sat. aq. NaHCO<sub>3</sub> (2  $\times$  5 mL), dried and concentrated *in vacuo*. The residue was triturated with Et<sub>2</sub>O and the precipitate was collected *via* filtration and dried *in vacuo* to give **31** as a white crystalline solid (187 mg, 27%, >99:1 dr); mp 184-186  $^{\circ}$ C;  $\nu_{\text{max}}$  (KBr) 3020, 2930, 2860 (C–H), 1224, 1151 (S=O);  $\delta_{\text{H}}$  (400 MHz, CDCl<sub>3</sub>) 0.73 (1H, td, *J* 13.3, 8.8, CH<sub>2</sub>), 1.03-1.29 (2H, m, CH<sub>2</sub>), 1.54-1.65 (1H, m, CH<sub>2</sub>), 1.70-1.82 (1H, m, CH<sub>2</sub>), 1.89 (1H, app d, *J* 13.6, CH<sub>2</sub>), 2.15-2.25 (1H, m, CH<sub>2</sub>),

<sup>19</sup> The quartet associated with the CF<sub>3</sub> group was not observed within the <sup>13</sup>C NMR spectrum of **30** due to low signal intensity.

2.76 (1H, app d,  $J$  14.4,  $\text{CH}_2$ ), 2.89-2.97 (1H, m,  $\text{C}(3)\text{H}$ ) overlapping 2.93 (3H, s,  $\text{NMe}$ ), 3.06-3.13 (1H, m,  $\text{C}(1)\text{H}$ ), 3.67 (1H, dd,  $J$  7.7, 5.2,  $\text{C}(2)\text{H}$ ), 4.26 (1H, d,  $J$  13.4,  $\text{N}(\text{CH}_\text{A}\text{H}_\text{B}\text{Ph})_\text{A}$ ), 4.77 (1H, d,  $J$  12.8,  $\text{N}(\text{CH}_\text{A}\text{H}_\text{B}\text{Ph})_\text{B}$ ), 4.94 (1H, d,  $J$  12.8,  $\text{N}(\text{CH}_\text{A}\text{H}_\text{B}\text{Ph})_\text{B}$ ), 5.06 (1H, d,  $J$  13.4,  $\text{N}(\text{CH}_\text{A}\text{H}_\text{B}\text{Ph})_\text{A}$ ), 7.28-7.50 (10H, m,  $\text{Ph}$ );  $\delta_\text{C}$  (100 MHz,  $\text{CDCl}_3$ )<sup>20</sup> 22.7, 26.3, 27.5, 29.0 ( $\text{C}(4)\text{--C}(7)$ ), 46.3 ( $\text{NMe}$ ), 52.3, 54.0 ( $\text{C}(1)$ ,  $\text{C}(2)$ ), 62.0 ( $\text{N}(\text{CH}_2\text{Ph})_\text{A}$ ), 64.4 ( $\text{N}(\text{CH}_2\text{Ph})_\text{B}$ ), 73.0 ( $\text{C}(3)$ ), 126.6, 127.0 ( $i\text{-Ph}$ ), 129.4, 129.5, 130.8, 131.0, 133.0, 133.8 ( $o\text{-}$ ,  $m\text{-}$ ,  $p\text{-Ph}$ );  $m/z$  ( $\text{ESI}^+$ ) 322 ( $[\text{M--OTf}]^+$ , 100%); HRMS ( $\text{ESI}^+$ )  $\text{C}_{22}\text{H}_{28}\text{NO}^+$  ( $[\text{M--OTf}]^+$ ) requires 322.2165; found 322.2163.

*From 30*:  $\text{Cl}_3\text{CCO}_2\text{H}$  (92.2 mg, 0.56 mmol) was added to a solution of **30** (51 mg, 0.11 mmol) in  $\text{CH}_2\text{Cl}_2$  (0.37 mL, 0.3 M w.r.t **30**) and the resultant mixture was stirred at rt for 5 min. *m*CPBA (69%, 30 mg, 0.12 mmol) was then added in one portion and the reaction mixture was stirred at rt for 3.5 h. The mixture was then diluted with  $\text{CH}_2\text{Cl}_2$  and sat. aq.  $\text{Na}_2\text{SO}_3$  was added until starch-iodide paper indicated no remaining peracid. Sat. aq.  $\text{NaHCO}_3$  (5 mL) was then added, and the layers were separated. The organic layer was washed with sat. aq.  $\text{NaHCO}_3$  ( $2 \times 5$  mL), then dried, filtered and concentrated *in vacuo* to give a 66:17:17 mixture of **30**:**31**:**32** as a yellow gum (49 mg). Data for **31**:  $\delta_\text{H}$  (400 MHz,  $\text{CDCl}_3$ ) [selected peaks] 5.19 (1H, d,  $J$  13.3,  $\text{N}(\text{CH}_\text{A}\text{H}_\text{B}\text{Ph})_\text{A}$ ).

### (1*RS*,2*RS*,3*RS*)-1-Acetoxy-2-methanesulfonyloxy-3-(*N,N*-dibenzylamino)cyclopentane **33**

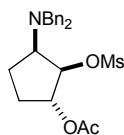

$\text{MsCl}$  (1.32 mL, 17.1 mmol) was added dropwise to a stirred solution of **22** (4.83 g, 14.2 mmol),  $\text{Et}_3\text{N}$  (5.95 mL, 47.2 mmol) and DMAP (174 mg, 1.42 mmol) in  $\text{CH}_2\text{Cl}_2$  (100 mL) at 0 °C, and the resultant mixture was stirred at 0 °C for 1 h. The reaction mixture was then allowed to warm to rt and was stirred for a further 1 h. The mixture was then washed sequentially with  $\text{H}_2\text{O}$  (100 mL) and sat. aq.  $\text{CuSO}_4$  ( $3 \times 100$  mL) then dried, filtered through a short plug of silica (eluent  $\text{CH}_2\text{Cl}_2$ ) and concentrated *in vacuo* to give **33** as a colourless oil which solidified on standing to a white crystalline solid (5.64 g, 93%, >99:1 dr). Recrystallisation of an aliquot (40-60 °C petrol/ $\text{CHCl}_3$ , 80:20) gave an analytical sample;  $R_f$  0.15 (40-60 °C petrol/ $\text{EtOAc}$ , 80:20); mp 94-95 °C (dec);  $\nu_\text{max}$  (KBr) 3085, 3062, 3028, 2962, 2883, 2807 (C-H), 1737 (C=O), 1602, 1494, 1454, 1357 (S=O), 1238 (C-O), 1176 (S=O);  $\delta_\text{H}$  (400 MHz,  $\text{CDCl}_3$ ) 1.50-1.60 (1H, m,  $\text{C}(5)\text{H}_\text{A}$ ), 1.89-1.98 (2H, m,  $\text{C}(4)\text{H}_2$ ), 2.00 (3H, s,  $\text{COMe}$ ), 2.24-2.35 (1H, m,  $\text{C}(5)\text{H}_\text{B}$ ), 3.15 (3H, s,  $\text{SO}_2\text{Me}$ ), 3.33 (1H, app td,  $J$  9.4, 5.3,  $\text{C}(3)\text{H}$ ), 3.86 (4H, AB system,  $J_\text{AB}$  14.2,  $\text{N}(\text{CH}_2\text{Ph})_2$ ), 5.00 (1H, dd,  $J$  5.3, 1.8,

<sup>20</sup> The quartet associated with the  $\text{CF}_3$  group was not observed within the  $^{13}\text{C}$  NMR spectrum of **31** due to low signal intensity.



C(2)*H*), 5.14 (1*H*, ddd, *J* 6.9, 4.8, 1.8, C(1)*H*), 7.21-7.43 (10*H*, m, *Ph*);  $\delta_c$  (100 MHz, CDCl<sub>3</sub>) 20.9 (COMe), 24.2, 27.3 (C(4), C(5)), 38.8 (SO<sub>2</sub>Me), 55.5 (N(CH<sub>2</sub>Ph)<sub>2</sub>), 61.0 (C(3)), 77.2 (C(2)), 83.8 (C(1)), 126.9 (*p-Ph*), 128.3, 128.6 (*o-*, *m-Ph*), 139.7 (*i-Ph*), 170.2 (COMe); *m/z* (ESI<sup>+</sup>) 418 ([M+H]<sup>+</sup>, 100%); HRMS (ESI<sup>+</sup>) C<sub>22</sub>H<sub>27</sub>NNaO<sub>5</sub>S<sup>+</sup> ([M+Na]<sup>+</sup>) requires 440.1502; found 440.1500.

### X-ray Crystal Structure Determination for **33**

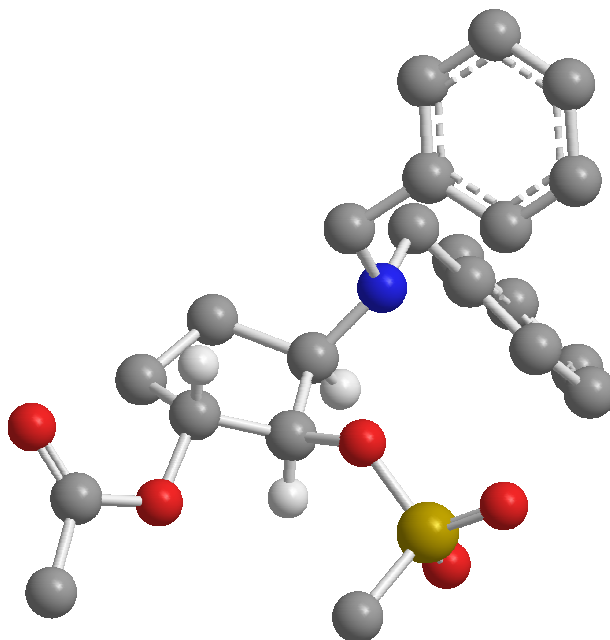

Data were collected using an Enraf-Nonius  $\kappa$ -CCD diffractometer with graphite monochromated Mo-*K* $\alpha$  radiation using standard procedures at 150 K. The structure was solved by direct methods (SIR92); all non-hydrogen atoms were refined with anisotropic thermal parameters. Hydrogen atoms were added at idealised positions. The structure was refined using CRYSTALS.<sup>21</sup>

X-ray crystal structure data for **33** [C<sub>22</sub>H<sub>27</sub>NO<sub>5</sub>S]: *M* = 417.53, monoclinic, space group *P* 2<sub>1</sub>/*n*, *a* = 9.6265(2) Å, *b* = 7.4403(2) Å, *c* = 29.2042(7) Å,  $\beta$  = 90.7608(11)°, *V* = 2091.54(9) Å<sup>3</sup>, *Z* = 4,  $\mu$  = 0.188 mm<sup>-1</sup>, colourless plate, crystal dimensions = 0.1 × 0.1 × 0.2 mm<sup>3</sup>. A total of 4598 unique reflections were measured for 5 <  $\theta$  < 27 and 2231 reflections were used in the refinement. The final parameters were *wR*<sub>2</sub> = 0.056 and *R*<sub>1</sub> = 0.049 [*I* > 2.0 $\sigma$ (*I*)]. Crystallographic data (excluding structure factors) has been deposited with the Cambridge Crystallographic Data Centre as supplementary publication number CCDC 733895. Copies of the data can be obtained, free of charge, on application to CCDC, 12 Union Road, Cambridge, CB2 1EZ, UK [fax: +44(0)-1223-336033 or e-mail: deposit@ccdc.cam.ac.uk].

<sup>21</sup> Betteridge, P. W.; Carruthers, J. R.; Cooper, R. I.; Prout, C. K.; Watkin, D. J. CRYSTALS, 2001, Issue 11, Chemical Crystallography Laboratory, University of Oxford, UK.

### (1*RS*,2*SR*,3*RS*)-1,2-Epoxy-3-(*N,N*-dibenzylamino)cyclopentane **34**

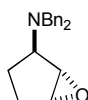

A mixture of **33** (3.99 g, 9.56 mmol) and K<sub>2</sub>CO<sub>3</sub> (1.59 g, 11.5 mmol) in MeOH/THF (v:v 7:3, 70 mL) was stirred at rt for 2 h then concentrated *in vacuo*. The residue was partitioned between CH<sub>2</sub>Cl<sub>2</sub> (100 mL) and H<sub>2</sub>O (100 mL) and the organic layer was washed with H<sub>2</sub>O (2 × 100 mL), then dried, filtered through a short plug of silica (eluent CH<sub>2</sub>Cl<sub>2</sub>) and concentrated *in vacuo* to give **34** as a white crystalline solid (2.67 g, quant, >99:1 dr); mp 66-69 °C;  $\nu_{\max}$  (KBr) 3087, 3062, 3027, 2931, 2801 (C–H), 1602, 1494, 1453;  $\delta_{\text{H}}$  (400 MHz, CDCl<sub>3</sub>) 1.44-1.56 (1H, m, C(4)*H*<sub>A</sub>), 1.75-1.84 (1H, m, C(5)*H*<sub>A</sub>), 1.89-1.96 (1H, m, C(4)*H*<sub>B</sub>), 2.01-2.09 (1H, m, C(5)*H*<sub>B</sub>), 3.44 (2H, d, *J* 13.7, N(CH<sub>A</sub>H<sub>B</sub>Ph)<sub>2</sub>), 3.47 (1H, app d, *J* 2.1, *CH*), 3.50 (1H, app d, *J* 7.9, *CH*), 3.54-3.56 (1H, m, *CH*), 3.73 (2H, d, *J* 13.7, N(CH<sub>A</sub>H<sub>B</sub>Ph)<sub>2</sub>), 7.23-7.42 (10H, m, *Ph*);  $\delta_{\text{C}}$  (100 MHz, CDCl<sub>3</sub>) 21.6 (C(4)), 27.5 (C(5)), 55.0 (N(CH<sub>2</sub>Ph)<sub>2</sub>), 58.9 (C(3)), 59.2, 59.4 (C(1), C(2)), 127.0 (*p-Ph*), 128.3, 128.1 (*o-*, *m-Ph*), 139.7 (*i-Ph*); *m/z* (ESI<sup>+</sup>) 280 ([M+H]<sup>+</sup>, 100%); HRMS (ESI<sup>+</sup>) C<sub>19</sub>H<sub>22</sub>NO<sup>+</sup> ([M+H]<sup>+</sup>) requires 280.1696; found 280.1696.

### X-ray Crystal Structure Determination for **34**

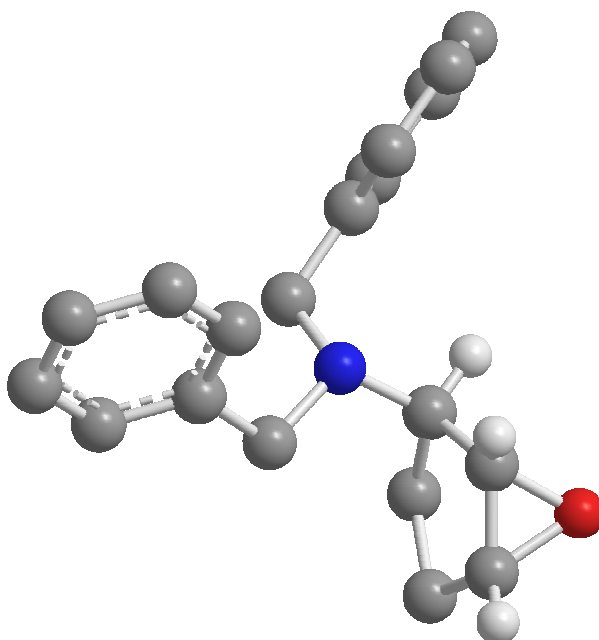

Data were collected using an Enraf-Nonius  $\kappa$ -CCD diffractometer with graphite monochromated Mo-*K* $\alpha$  radiation using standard procedures at 150 K. The structure was solved by direct methods (SIR92); all non-hydrogen atoms were refined with anisotropic thermal parameters. Hydrogen atoms were added at idealised positions. The structure was refined using CRYSTALS.<sup>22</sup>

<sup>22</sup> Betteridge, P. W.; Carruthers, J. R.; Cooper, R. I.; Prout, C. K.; Watkin, D. J. CRYSTALS, 2001, Issue 11, Chemical Crystallography Laboratory, University of Oxford, UK.

X-ray crystal structure data for **34** [C<sub>19</sub>H<sub>21</sub>NO]:  $M = 279.38$ , orthorhombic, space group  $P n 2_1$ ,  $a = 8.38070(10)$  Å,  $b = 8.5672(2)$  Å,  $c = 21.6908(4)$  Å,  $V = 1557.38(5)$  Å<sup>3</sup>,  $Z = 4$ ,  $\mu = 0.073$  mm<sup>-1</sup>, colourless plate, crystal dimensions =  $0.1 \times 0.1 \times 0.2$  mm<sup>3</sup>. A total of 1886 unique reflections were measured for  $5 < \theta < 27$  and 1582 reflections were used in the refinement. The final parameters were  $wR_2 = 0.072$  and  $R_1 = 0.035$  [ $I > 3.0\sigma(I)$ ]. Crystallographic data (excluding structure factors) has been deposited with the Cambridge Crystallographic Data Centre as supplementary publication number CCDC 733896. Copies of the data can be obtained, free of charge, on application to CCDC, 12 Union Road, Cambridge, CB2 1EZ, UK [fax: +44(0)-1223-336033 or e-mail: deposit@ccdc.cam.ac.uk].

**(1*RS*,2*RS*,3*SR*)-3-(*N,N*-Dibenzylamino)cyclopentane-1,2-diol **35****

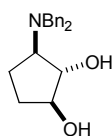

3 M aq. H<sub>2</sub>SO<sub>4</sub> (1.4 mL) was added to a stirred solution of **34** (139 mg, 0.50 mmol) in THF (4.2 mL) and the resultant mixture was stirred at 40 °C for 24 h. The reaction mixture was then allowed to cool to rt and was concentrated *in vacuo*. The residue was dissolved in Et<sub>2</sub>O (10 mL) and washed with sat. aq. NaHCO<sub>3</sub> (3 × 10 mL), then dried and concentrated *in vacuo*. Purification *via* flash column chromatography (gradient elution, 12%→100% EtOAc in 40-60 °C petrol) gave **35** as a colourless oil which solidified on standing to a white crystalline solid (124 mg, 83%, >99:1 dr);  $R_f$  0.13 (40-60 °C petrol/EtOAc, 50:50); mp 55-57 °C;  $\nu_{\max}$  (KBr) 3383 (O–H), 3085, 3062, 3028, 2960, 2877, 2837, 2804 (C–H), 1602, 1494, 1454;  $\delta_H$  (400 MHz, CDCl<sub>3</sub>) 1.51-1.62 (1H, m, CH<sub>2</sub>), 1.68-1.86 (2H, m, CH<sub>2</sub>), 1.91-2.01 (1H, m, CH<sub>2</sub>), 2.26 (2H, br s, 2 × OH), 3.00 (1H, app q,  $J$  8.8, C(3)H), 3.54 (2H, d,  $J$  13.9, N(CH<sub>A</sub>H<sub>B</sub>Ph)<sub>2</sub>), 3.83 (2H, d,  $J$  13.9, N(CH<sub>A</sub>H<sub>B</sub>Ph)<sub>2</sub>), 3.85-3.90 (2H, m, C(1)H, C(2)H), 7.22-7.39 (10H, m, Ph);  $\delta_C$  (100 MHz, CDCl<sub>3</sub>) 19.2, 28.3 (C(4), C(5)), 54.6 (N(CH<sub>2</sub>Ph)<sub>2</sub>), 64.1 (C(3)), 75.9 (C(2)), 79.5 (C(1)), 127.0 (*p*-Ph), 128.4, 128.6 (*o*-, *m*-Ph), 139.9 (*i*-Ph);  $m/z$  (ESI<sup>+</sup>) 298 ([M+H]<sup>+</sup>, 100%); HRMS (ESI<sup>+</sup>) C<sub>19</sub>H<sub>24</sub>NO<sub>2</sub><sup>+</sup> ([M+H]<sup>+</sup>) requires 298.1802; found 298.1801.

**(1*RS*,2*SR*,3*RS*)-3-(*N,N*-Dibenzylamino)cyclopentane-1,2-diol **39****

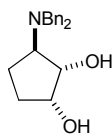

*From 33*: KOAc (353 mg, 3.59 mmol) was added to a stirred solution of **33** (1.00 g, 2.40 mmol) in AcOH/H<sub>2</sub>O (v:v 6:1, 40 mL) and the resultant mixture was heated at 80 °C for 18 h. The reaction mixture

was allowed to cool to rt then concentrated *in vacuo*. The residue was dissolved in Et<sub>2</sub>O (50 mL) and the resultant solution was washed with sat. aq. NaHCO<sub>3</sub> (3 × 50 mL), then dried and concentrated *in vacuo* to give a 34:12:54 mixture of **36:37:38**. Following the *General Procedure*, transesterification with K<sub>2</sub>CO<sub>3</sub> (1.64 g, 12 mmol) in MeOH (10 mL) gave a 54:46 mixture of **38:39**. Purification *via* flash column chromatography (gradient elution, 0%→20% EtOAc in 40-60 °C petrol) gave **38** as a yellow oil (175 mg, 37%);<sup>10</sup> *R<sub>f</sub>* 0.35 (40-60 °C petrol/EtOAc, 50:50); δ<sub>H</sub> (400 MHz, CDCl<sub>3</sub>) 1.73 (1H, br s, *NH*), 3.87 (4H, s, *CH*<sub>2</sub>), 7.29-7.43 (10H, m, *Ph*); δ<sub>C</sub> (100 MHz, CDCl<sub>3</sub>) 53.2 (*CH*<sub>2</sub>), 127.0 (*p-Ph*), 128.2, 128.5 (*o-*, *m-Ph*), 140.4 (*i-Ph*); *m/z* (ESI<sup>+</sup>) 198 ([*M*+*H*]<sup>+</sup>, 100%). Further elution (gradient elution, 20→50% EtOAc in 40-60 °C petrol) gave **39** as a pale brown crystalline solid (311 mg, 44%, >99:1 dr). Trituration of an aliquot using Et<sub>2</sub>O gave an analytical sample as a white crystalline solid; *R<sub>f</sub>* 0.26 (40-60 °C petrol/EtOAc, 50:50); C<sub>19</sub>H<sub>23</sub>NO<sub>2</sub> requires C, 76.7; H, 7.8; N, 4.7%; found C, 76.5; H, 7.7; N, 4.8%; mp 73-74 °C; ν<sub>max</sub> (KBr) 3385 (O–H), 3084, 3062, 3027, 2930 (C–H), 1602, 1494, 1453; δ<sub>H</sub> (400 MHz, CDCl<sub>3</sub>) 1.52-1.75 (2H, m, *CH*<sub>2</sub>), 1.83-1.96 (2H, m, *CH*<sub>2</sub>), 2.52 (2H, br s, 2 × *OH*), 3.27 (1H, app q, *J* 8.4, C(3)*H*), 3.57 (2H, d, *J* 13.9, N(*CH*<sub>A</sub>*H*<sub>B</sub>Ph)<sub>2</sub>), 3.78 (2H, d, *J* 13.9, N(*CH*<sub>A</sub>*H*<sub>B</sub>Ph)<sub>2</sub>), 3.92 (1H, dd, *J* 8.2, 5.2, C(2)*H*), 3.99-4.05 (1H, m, C(1)*H*), 7.22-7.43 (10H, m, *Ph*); δ<sub>C</sub> (100 MHz, CDCl<sub>3</sub>) 19.6, 29.0 (C(4), C(5)), 55.0 (N(*CH*<sub>2</sub>Ph)<sub>2</sub>), 65.1 (C(3)), 71.1, 74.6 (C(1), C(2)), 127.1 (*p-Ph*), 128.4, 128.7 (*o-*, *m-Ph*), 139.9 (*i-Ph*); *m/z* (ESI<sup>+</sup>) 298 ([*M*+*H*]<sup>+</sup>, 100%); HRMS (ESI<sup>+</sup>) C<sub>19</sub>H<sub>24</sub>NO<sub>2</sub><sup>+</sup> ([*M*+*H*]<sup>+</sup>) requires 298.1802; found 298.1803.

*Dihydroxylation of 14*: OsO<sub>4</sub> (52.8 mg, 1 mol%) was added to a stirred solution of **14** (5.47 g, 20.8 mmol) and NMO (7.30 g, 62.3 mmol) in acetone/H<sub>2</sub>O (v:v 4:1, 160 mL) and the resultant mixture was stirred at rt for 4 h. Sat. aq. Na<sub>2</sub>SO<sub>3</sub> (10 mL) was then added and the solution was stirred for an additional 30 min. The reaction mixture was then concentrated *in vacuo* and dissolved in CH<sub>2</sub>Cl<sub>2</sub> (100 mL). The resultant solution was filtered through a short plug of silica (eluent CH<sub>2</sub>Cl<sub>2</sub>), dried and concentrated *in vacuo* to give a 91:9 mixture of **39:47**. Purification *via* flash column chromatography (gradient elution, 12%→100% EtOAc in 40-60 °C petrol) gave **39** as a white crystalline solid (2.86 g, 46%, >99:1 dr).

## X-ray Crystal Structure Determination for **39**•MeC<sub>6</sub>H<sub>3</sub>(NO<sub>2</sub>)SO<sub>3</sub>H

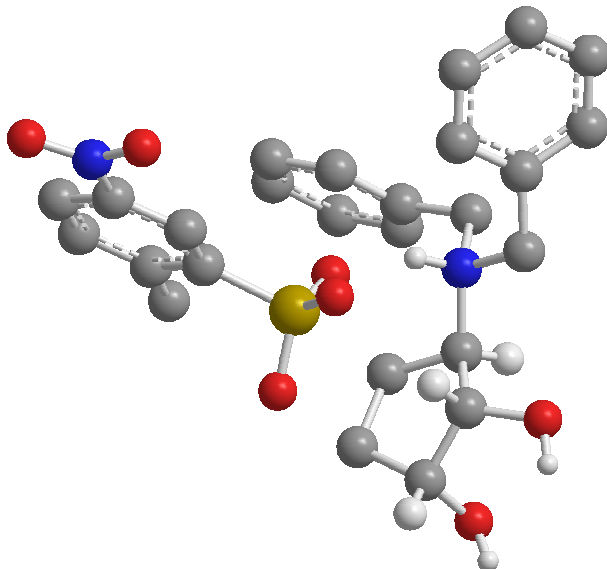

Data were collected using an Enraf-Nonius  $\kappa$ -CCD diffractometer with graphite monochromated Mo- $K\alpha$  radiation using standard procedures at 150 K. The structure was solved by direct methods (SIR92); all non-hydrogen atoms were refined with anisotropic thermal parameters. Hydrogen atoms were added at idealised positions. The structure was refined using CRYSTALS.<sup>23</sup>

X-ray crystal structure data for **39**•MeC<sub>6</sub>H<sub>3</sub>(NO<sub>2</sub>)SO<sub>3</sub>H [C<sub>26</sub>H<sub>30</sub>N<sub>2</sub>O<sub>7</sub>S]:  $M = 514.60$ , triclinic, space group  $P\bar{1}$ ,  $a = 9.2056(2)$  Å,  $b = 10.1292(2)$  Å,  $c = 14.5600(3)$  Å,  $\alpha = 93.3862(8)^\circ$ ,  $\beta = 104.3284(9)^\circ$ ,  $\gamma = 108.7909(8)^\circ$ ,  $V = 1230.97(5)$  Å<sup>3</sup>,  $Z = 2$ ,  $\mu = 0.181$  mm<sup>-1</sup>, colourless plate, crystal dimensions =  $0.05 \times 0.1 \times 0.3$  mm<sup>3</sup>. A total of 5611 unique reflections were measured for  $5 < \theta < 27$  and 5611 reflections were used in the refinement. The final parameters were  $wR_2 = 0.110$  and  $R_1 = 0.059$  [ $I > 3.0\sigma(I)$ ]. Crystallographic data (excluding structure factors) has been deposited with the Cambridge Crystallographic Data Centre as supplementary publication number CCDC 733897. Copies of the data can be obtained, free of charge, on application to CCDC, 12 Union Road, Cambridge, CB2 1EZ, UK [fax: +44(0)-1223-336033 or e-mail: deposit@ccdc.cam.ac.uk].

## (1*RS*,2*RS*,3*RS*)-1-*p*-Toluenesulfonyloxy-2-acetoxy-3-(*N,N*-dibenzylamino)cyclopentane **44**

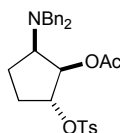

Ac<sub>2</sub>O (370  $\mu$ L, 3.96 mmol) was added to solution of **23** (1.49 g, 3.23 mmol), Et<sub>3</sub>N (550  $\mu$ L, 3.96 mmol) and DMAP (40.0 mg, 0.32 mmol) in CH<sub>2</sub>Cl<sub>2</sub> (30 mL), and the resultant mixture was stirred at rt for 6 h. The

<sup>23</sup> Betteridge, P. W.; Carruthers, J. R.; Cooper, R. I.; Prout, C. K.; Watkin, D. J. CRYSTALS, 2001, Issue 11, Chemical Crystallography Laboratory, University of Oxford, UK.

reaction mixture was then diluted with CH<sub>2</sub>Cl<sub>2</sub> (70 mL) and washed sequentially with sat. aq. NaHCO<sub>3</sub> (3 × 50 mL) and sat. aq. CuSO<sub>4</sub> (3 × 50 mL). The organic layer was then dried and concentrated *in vacuo*. Purification *via* flash column chromatography (eluent 40-60 °C petrol/EtOAc, 80:20) gave **44** as a colourless oil which solidified on standing to a white solid (1.48 g, 93%, >99:1 dr); *R<sub>f</sub>* 0.13 (40-60 °C petrol/EtOAc, 80:20); mp 82-83 °C (dec); *v*<sub>max</sub> (KBr) 3062, 3028, 2952, 2805 (C–H), 1743 (C=O), 1599, 1494, 1453, 1366 (S=O), 1231 (C–O), 1190 (C–O), 1177 (S=O); *δ*<sub>H</sub> (400 MHz, CDCl<sub>3</sub>) 1.63-1.74 (1H, m, CH<sub>2</sub>), 1.75-1.86 (1H, m, CH<sub>2</sub>), 1.87-1.96 (1H, m, CH<sub>2</sub>) overlapping 1.93 (3H, s, COMe), 2.12-2.21 (1H, m, CH<sub>2</sub>), 2.45 (3H, s, ArMe), 3.36 (1H, ddd, *J* 10.2, 7.8, 6.3, C(3)*H*), 3.65 (4H, A<sub>2</sub>, N(CH<sub>2</sub>Ph)<sub>2</sub>), 4.76 (1H, ddd, *J* 7.2, 5.4, 3.3, C(1)*H*), 5.19 (1H, dd, *J* 6.3, 3.3, C(2)*H*), 7.19-7.32 (10H, m, Ar, Ph), 7.34 (2H, d, *J* 8.2, Ar), 7.76 (2H, d, *J* 8.2, Ar); *δ*<sub>C</sub> (100 MHz, CDCl<sub>3</sub>) 21.1, 21.7 (COMe, ArMe), 23.7, 28.5 (C(4), C(5)), 56.0 (N(CH<sub>2</sub>Ph)<sub>2</sub>), 60.2 (C(3)), 76.5 (C(2)), 84.3 (C(1)), 126.9, 127.9, 128.3, 129.9, 133.8, 139.5, 144.8 (Ar, Ph), 169.5 (COMe); *m/z* (ESI<sup>+</sup>) 494 ([M+H]<sup>+</sup>, 100%); HRMS (ESI<sup>+</sup>) C<sub>28</sub>H<sub>32</sub>NO<sub>5</sub>S<sup>+</sup> ([M+H]<sup>+</sup>) requires 494.1996; found 494.2005.

**(1*RS*,2*SR*,3*SR*)-3-(*N,N*-Dibenzylamino)cyclopentane-1,2-diol **47****

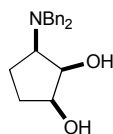

KOAc (244 mg, 2.49 mmol) was added to a stirred solution of **44** (818 mg, 1.66 mmol) in EtOH/H<sub>2</sub>O (v:v 6:1, 30 mL) and the resultant mixture was heated at 80 °C for 6 h. The reaction mixture was allowed to cool to rt then concentrated *in vacuo*. The residue was dissolved in Et<sub>2</sub>O (50 mL) and the resultant solution was washed with sat. aq. NaHCO<sub>3</sub> (3 × 50 mL), then dried and concentrated *in vacuo* to give a 69:31 mixture of **45:46** as a colourless oil (563 mg, quant). Data for **45**: *δ*<sub>H</sub> (400 MHz, CDCl<sub>3</sub>) 1.67-2.10 (4H, m, CH<sub>2</sub>), 2.12 (3H, s, COMe), 3.09-3.16 (1H, app td, *J* 8.5, 3.8, C(3)*H*), 3.73 (4H, A<sub>2</sub>, N(CH<sub>2</sub>Ph)<sub>2</sub>), 4.26 (1H, app t, *J* 3.8, C(2)*H*), 4.99-5.05 (1H, m, C(1)*H*), 7.21-7.37 (10H, m, Ph). Data for **46**: *δ*<sub>H</sub> (400 MHz, CDCl<sub>3</sub>) 1.67-2.10 (4H, m, CH<sub>2</sub>), 2.18 (3H, s, COMe), 3.24 (1H, ddd, *J* 10.2, 8.2, 4.9, C(3)*H*), 3.76 (4H, A<sub>2</sub>, N(CH<sub>2</sub>Ph)<sub>2</sub>), 4.16 (1H, app td, *J* 7.3, 4.2, C(1)*H*), 5.29 (1H, app t, *J* 4.6, C(2)*H*), 7.21-7.37 (10H, m, Ph). Following the *General Procedure*, transesterification with K<sub>2</sub>CO<sub>3</sub> (1.15 g, 8.3 mmol) in MeOH (6 mL) gave **47** in >99:1 dr. Purification *via* flash column chromatography (gradient elution, 12%→100% EtOAc in 40-60 °C petrol) gave **47** as a brown oil which solidified on standing to a brown solid (465 mg, 94%, >99:1 dr); *R<sub>f</sub>* 0.34 (40-60 °C petrol/EtOAc, 50:50); mp 38-40 °C; *v*<sub>max</sub> (film) 3401 (O–H), 3084, 3062, 3027, 2939 (C–H), 1602, 1494, 1453; *δ*<sub>H</sub> (400 MHz, CDCl<sub>3</sub>) 1.74-1.95 (4H, m, CH<sub>2</sub>), 3.09-3.17 (1H, m, C(3)*H*), 3.69 (2H, d, *J* 14.2, N(CH<sub>A</sub>H<sub>B</sub>Ph)<sub>2</sub>), 3.81 (2H, d, *J* 14.2, N(CH<sub>A</sub>H<sub>B</sub>Ph)<sub>2</sub>), 3.95-3.99 (1H, m, C(2)*H*), 4.10-4.15 (1H, m, C(1)*H*),

7.25-7.38 (10H, m, *Ph*);  $\delta_{\text{C}}$  (100 MHz,  $\text{CDCl}_3$ ) 25.4, 31.0 (*C*(4), *C*(5)), 55.4 ( $\text{N}(\text{CH}_2\text{Ph})_2$ ), 64.2 (*C*(3)), 71.1, 72.2 (*C*(1), *C*(2)), 127.3 (*p-Ph*), 128.5, 128.9 (*o-*, *m-Ph*), 138.5 (*i-Ph*);  $m/z$  ( $\text{ESI}^+$ ) 298 ( $[\text{M}+\text{H}]^+$ , 100%); HRMS ( $\text{ESI}^+$ )  $\text{C}_{19}\text{H}_{24}\text{NO}_2^+$  ( $[\text{M}+\text{H}]^+$ ) requires 298.1802; found 298.1799.

#### (1*RS*,2*RS*,3*RS*)-3-Aminocyclopentane-1,2-diol hydrochloride **48**

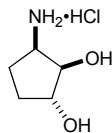

$\text{Pd}(\text{OH})_2/\text{C}$  (125 mg, 50% w/w) was added to a vigorously stirred solution of **24** (250 mg, 0.84 mmol) in degassed MeOH (5 mL) and the resultant suspension was stirred at rt under  $\text{H}_2$  (1 atm) for 4 h. The suspension was filtered through a pad of Celite<sup>®</sup> (eluent MeOH), the filtrate was acidified to pH 1 with conc. aq. HCl and concentrated *in vacuo* to give **48** as a yellow gum (122 mg, 95%, >99:1 dr);<sup>24</sup>  $\nu_{\text{max}}$  (film) 3385 (O–H, N–H);  $\delta_{\text{H}}$  (400 MHz,  $d_6$ -DMSO) 1.32-1.44 (1H, m, *C*(5) $H_{\text{A}}$ ), 1.50-1.62 (1H, m, *C*(4) $H_{\text{A}}$ ), 1.93-2.05 (2H, m, *C*(4) $H_{\text{B}}$ , *C*(5) $H_{\text{B}}$ ), 3.36-3.49 (1H, m, *C*(3)*H*), 3.81 (1H, app s, *C*(2)*H*), 3.89 (1H, app s, *C*(1)*H*), 4.96 (1H, br s, *OH*), 5.65 (1H, d, *J* 3.8, *OH*), 7.95 (3H, br s,  $\text{NH}_3$ );  $\delta_{\text{C}}$  (100 MHz,  $\text{CDCl}_3$ ) 26.3, 30.6 (*C*(4), *C*(5)), 52.4 (*C*(3)), 76.3, 76.5 (*C*(1), *C*(2));  $m/z$  ( $\text{ESI}^+$ ) 118 ( $[\text{M}-\text{Cl}]^+$ , 100%); HRMS ( $\text{ESI}^+$ )  $\text{C}_5\text{H}_{12}\text{NO}_2^+$  ( $[\text{M}-\text{Cl}]^+$ ) requires 118.0863; found 118.0865.

#### (1*RS*,2*RS*,3*SR*)-3-Aminocyclopentane-1,2-diol hydrochloride **49**

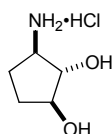

$\text{Pd}(\text{OH})_2/\text{C}$  (50 mg, 50% w/w) was added to a vigorously stirred solution of **35** (100 mg, 0.34 mmol) in degassed MeOH (2 mL) and the resultant suspension was stirred at rt under  $\text{H}_2$  (1 atm) for 4 h. The suspension was filtered through a pad of Celite<sup>®</sup> (eluent MeOH), the filtrate was acidified to pH 1 with conc. aq. HCl and concentrated *in vacuo* to give **49** as a yellow gum (52 mg, quant, >99:1 dr);<sup>24</sup>  $\nu_{\text{max}}$  (film) 3383, 2957, 2063 (O–H, N–H);  $\delta_{\text{H}}$  (DMSO- $d_6$ ) 1.48-1.59 (1H, m, *C*(5) $H_{\text{A}}$ ), 1.60-1.72 (1H, m, *C*(4) $H_{\text{A}}$ ), 1.76-1.98 (2H, m, *C*(4) $H_{\text{B}}$ , *C*(5) $H_{\text{B}}$ ), 3.09 (1H, app q, *J* 7.4, *C*(3)*H*), 3.69-3.79 (2H, m, *C*(1)*H*, *C*(2)*H*), 5.15 (1H, br s, *OH*), 5.45 (1H, d, *J* 3.5, *OH*), 8.24 (3H, br s,  $\text{NH}_3$ );  $\delta_{\text{C}}$  (100 MHz,  $\text{CDCl}_3$ ) 25.6, 30.1 (*C*(4), *C*(5)), 56.4 (*C*(3)), 76.2, 81.1 (*C*(1), *C*(2));  $m/z$  ( $\text{ESI}^+$ ) 118 ( $[\text{M}-\text{Cl}]^+$ , 100%); HRMS ( $\text{ESI}^+$ )  $\text{C}_5\text{H}_{12}\text{NO}_2^+$  ( $[\text{M}-\text{Cl}]^+$ ) requires 118.0863; found 118.0867.

<sup>24</sup> Whitten, J. P.; McCarthy, J. R.; Whalon, M. R. *J. Org. Chem.* **1985**, 50, 4399.

**(1*RS*,2*SR*,3*RS*)-3-Aminocyclopentane-1,2-diol hydrochloride 50**

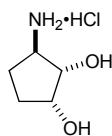

Pd(OH)<sub>2</sub>/C (125 mg, 50% w/w) was added to a vigorously stirred solution of **39** (250 mg, 0.84 mmol) in degassed MeOH (5 mL) and the resultant suspension was stirred at rt under H<sub>2</sub> (1 atm) for 4 h. The suspension was filtered through a pad of Celite<sup>®</sup> (eluent MeOH), the filtrate was acidified to pH 1 with conc. aq. HCl and concentrated *in vacuo* to give **50** as a white crystalline solid (126 mg, 97%, >99:1 dr);<sup>25</sup> mp 151-155 °C;  $\nu_{\max}$  (KBr) 3356, 2950, 2046 (O–H, N–H);  $\delta_{\text{H}}$  (400 MHz, *d*<sub>6</sub>-DMSO); 1.42-1.59 (2H, m, C(4)*H*<sub>A</sub>, C(5)*H*<sub>A</sub>), 1.78-1.91 (1H, m, C(5)*H*<sub>B</sub>), 1.96-2.09 (1H, m, C(4)*H*<sub>B</sub>), 3.23 (1H, app q, *J* 7.8, C(3)*H*), 3.75-3.82 (1H, m, C(2)*H*), 3.85-3.92 (1H, app s, C(1)*H*), 4.69 (1H, d, *J* 3.0, OH), 5.18 (1H, d, *J* 5.6, OH), 8.29 (3H, br s, NH<sub>3</sub>);  $\delta_{\text{C}}$  (100 MHz, CDCl<sub>3</sub>) 25.3, 29.7 (C(4), C(5)), 55.9 (C(3)), 71.5 (C(1)), 77.2 (C(2)); *m/z* (ESI<sup>+</sup>) 118 ([M–Cl]<sup>+</sup>, 100%); HRMS (ESI<sup>+</sup>) C<sub>5</sub>H<sub>12</sub>NO<sub>2</sub><sup>+</sup> ([M–Cl]<sup>+</sup>) requires 118.0863; found 118.0868.

**(1*RS*,2*SR*,3*SR*)-3-Aminocyclopentane-1,2-diol hydrochloride 51**

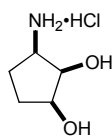

Pd(OH)<sub>2</sub>/C (144 mg, 50% w/w) was added to a vigorously stirred solution of **47** (288 mg, 0.97 mmol) in degassed MeOH (5 mL) and the resultant suspension was stirred at rt under H<sub>2</sub> (1 atm) for 4 h. The suspension was filtered through a pad of Celite<sup>®</sup> (eluent MeOH), the filtrate was acidified to pH 1 with conc. aq. HCl and concentrated *in vacuo* to give **51** as a yellow gum (176 mg, quant, >99:1 dr);<sup>25</sup>  $\nu_{\max}$  (film) 3310, 3230, 3140 (O–H, N–H);  $\delta_{\text{H}}$  (400 MHz, *d*<sub>6</sub>-DMSO) 1.57-1.75 (3H, m, CH<sub>2</sub>), 1.82-1.92 (1H, m, CH<sub>2</sub>), 3.28-3.38 (1H, m, C(3)*H*), 3.80-3.85 (1H, m, C(2)*H*), 3.89-3.95 (1H, m, C(1)*H*), 7.83 (3H, br s, NH<sub>3</sub>);  $\delta_{\text{C}}$  (100 MHz, CDCl<sub>3</sub>) 26.3, 29.6 (C(4), C(5)), 51.9 (C(3)), 72.4 (C(2)), 72.8 (C(1)); *m/z* (ESI<sup>+</sup>) 118 ([M–Cl]<sup>+</sup>, 100%); HRMS (ESI<sup>+</sup>) C<sub>5</sub>H<sub>12</sub>NO<sub>2</sub><sup>+</sup> ([M–Cl]<sup>+</sup>) requires 118.0863; found 118.0865.

**(1*RS*,2*RS*,3*SR*)-1-*p*-Toluenesulfonyloxy-2-hydroxy-3-(*N,N*-dibenzylamino)cycloheptane 52**

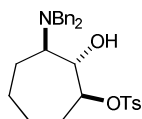

<sup>25</sup> Whitten, J. P.; McCarthy, J. R.; Whalon, M. R. *J. Org. Chem.* **1985**, *50*, 4399.



Anydrous TsOH (280 mg, 1.63 mmol) was added to a stirred solution of **28** (100 mg, 0.33 mmol) in CH<sub>2</sub>Cl<sub>2</sub> (5.2 mL) and the resultant mixture was heated at reflux for 4 h. The reaction mixture was allowed to cool to rt then diluted with CH<sub>2</sub>Cl<sub>2</sub> (15 mL). The resultant solution was washed with sat. aq. NaHCO<sub>3</sub> (3 × 10 mL) then dried and concentrated *in vacuo* to give **52** as a white crystalline solid (158 mg, quant, >99:1 dr); mp 94-96 °C (dec);  $\nu_{\max}$  (KBr) 3356 (O–H), 3086, 3063, 3028, 2934, 2863 (C–H), 1600, 1495, 1454, 1356 (S=O), 1175 (S=O);  $\delta_{\text{H}}$  (400 MHz, CDCl<sub>3</sub>) 1.20-1.47 (2H, m, CH<sub>2</sub>), 1.60-1.70 (2H, m, CH<sub>2</sub>), 1.76-1.86 (2H, m, CH<sub>2</sub>), 1.98-2.05 (1H, m, CH<sub>2</sub>), 2.38-2.47 (1H, m, C(4)*H*<sub>A</sub>) overlapping 2.41 (3H, s, Ar*Me*), 3.28 (2H, d, *J* 13.3, N(CH<sub>A</sub>H<sub>B</sub>Ph)<sub>2</sub>), 3.60 (1H, app dd, *J* 9.7, 5.3, C(3)*H*), 3.74 (2H, d, *J* 13.3, N(CH<sub>A</sub>H<sub>B</sub>Ph)<sub>2</sub>), 4.31 (1H, app s, C(2)*H*), 4.54 (1H, ddd, *J* 7.9, 5.3, 2.2, C(1)*H*), 7.19-7.34 (12H, m, Ar, Ph), 7.81-7.85 (2H, m, Ar);  $\delta_{\text{C}}$  (100 MHz, CDCl<sub>3</sub>) 20.7 (CH<sub>2</sub>), 21.7 (Ar*Me*), 22.2, 25.9, 29.3 (CH<sub>2</sub>), 53.1 (N(CH<sub>2</sub>Ph)<sub>2</sub>), 59.9 (C(3)), 74.2 (C(2)), 87.0 (C(1)), 127.5, 127.8, 128.6, 129.1, 129.6, 134.4, 138.3, 144.3 (Ar, Ph); *m/z* (ESI<sup>+</sup>) 480 ([M+H]<sup>+</sup>, 100%); HRMS (ESI<sup>+</sup>) C<sub>28</sub>H<sub>34</sub>NO<sub>4</sub>S<sup>+</sup> ([M+H]<sup>+</sup>) requires 480.2203; found 480.2186.

#### X-ray Crystal Structure Determination for **52**

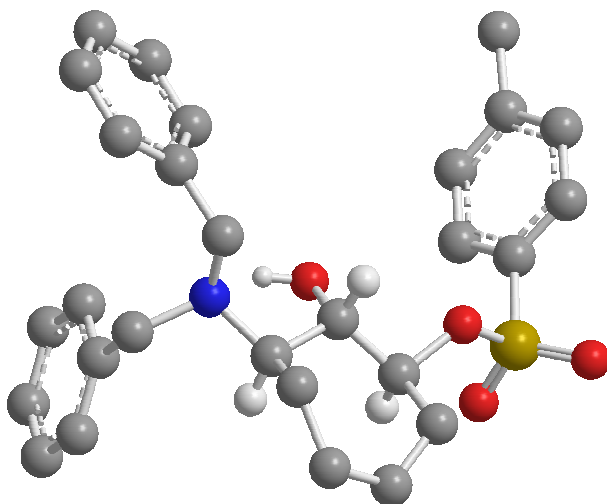

Data were collected using an Enraf-Nonius  $\kappa$ -CCD diffractometer with graphite monochromated Mo-*K* $\alpha$  radiation using standard procedures at 150 K. The structure was solved by direct methods (SIR92); all non-hydrogen atoms were refined with anisotropic thermal parameters. Hydrogen atoms were added at idealised positions. The structure was refined using CRYSTALS.<sup>26</sup>

X-ray crystal structure data for **52** [C<sub>28</sub>H<sub>33</sub>NO<sub>4</sub>S]: *M* = 479.64, monoclinic, space group *P* 2<sub>1</sub>/*n*, *a* = 9.8999(2) Å, *b* = 12.3140(3) Å, *c* = 20.6999(6) Å,  $\beta$  = 91.4895(9) °, *V* = 2522.62(11) Å<sup>3</sup>, *Z* = 4,  $\mu$  = 0.162 mm<sup>−1</sup>, colourless block, crystal dimensions = 0.1 × 0.1 × 0.1 mm<sup>3</sup>. A total of 5723 unique reflections were measured for 5 <  $\theta$  < 27 and 3124 reflections were used in the refinement. The final parameters were *wR*<sub>2</sub> =

<sup>26</sup> Betteridge, P. W.; Carruthers, J. R.; Cooper, R. I.; Prout, C. K.; Watkin, D. J. CRYSTALS, 2001, Issue 11, Chemical Crystallography Laboratory, University of Oxford, UK.

0.126 and  $R_1 = 0.062$  [ $I > 2.3 \sigma(I)$ ]. Crystallographic data (excluding structure factors) has been deposited with the Cambridge Crystallographic Data Centre as supplementary publication number CCDC 733898. Copies of the data can be obtained, free of charge, on application to CCDC, 12 Union Road, Cambridge, CB2 1EZ, UK [fax: +44(0)-1223-336033 or e-mail: deposit@ccdc.cam.ac.uk].

**(1*RS*,2*RS*,3*SR*)-1-Trichloroacetoxy-2-hydroxy-3-(*N,N*-dibenzylamino)cycloheptane **53****

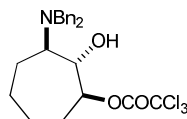

Anhydrous  $\text{Cl}_3\text{CCO}_2\text{H}$  (266 mg, 1.63 mmol) was added to a stirred solution of **28** (100 mg, 0.33 mmol) in  $\text{CH}_2\text{Cl}_2$  (5 mL) and the resultant mixture was heated at reflux for 12 h. The reaction mixture was allowed to cool to rt then diluted with  $\text{CH}_2\text{Cl}_2$  (15 mL). The resultant solution was washed with sat. aq.  $\text{NaHCO}_3$  ( $3 \times 10$  mL) then dried and concentrated *in vacuo*. Purification *via* recrystallisation (40-60 °C petrol/ $\text{CHCl}_3$ , 80:20) gave **53** as a white crystalline solid (135 mg, 87%, >99:1 dr); mp 119-121 °C;  $\nu_{\text{max}}$  (KBr) 3375 (O–H), 3086, 3063, 3028, 2936, 2864 (C–H), 1761 (C=O), 1603, 1495, 1454;  $\delta_{\text{H}}$  (400 MHz,  $\text{CDCl}_3$ ) 1.32-1.54 (3H, m,  $\text{CH}_2$ ), 1.62-1.75 (2H, m,  $\text{CH}_2$ ), 1.77-1.91 (2H, m,  $\text{CH}_2$ ), 2.05-2.16 (1H, m,  $\text{CH}_2$ ), 2.56 (1H, app t,  $J$  9.4, C(3) $H$ ), 3.35 (2H, d,  $J$  13.2,  $\text{N}(\text{CH}_\text{A}\text{H}_\text{B}\text{Ph})_2$ ), 3.76 (1H, dd,  $J$  9.9, 6.5, C(2) $H$ ), 3.85 (2H, d,  $J$  13.2,  $\text{N}(\text{CH}_\text{A}\text{H}_\text{B}\text{Ph})_2$ ), 4.64 (1H, br s, OH), 4.78-4.85 (1H, m, C(1) $H$ ), 7.25-7.37 (10H, m, Ph);  $\delta_{\text{C}}$  (100 MHz,  $\text{CDCl}_3$ ) 20.7, 21.8, 25.2, 27.7 (C(4)-C(7)), 53.2 ( $\text{N}(\text{CH}_2\text{Ph})_2$ ), 59.4 (C(3)), 73.6 (C(2)), 84.5 (C(1)), 90.3 ( $\text{CCl}_3$ ), 127.6 (*p*-Ph), 128.7, 129.1 (*o*-, *m*-Ph), 138.2 (*i*-Ph), 161.1 ( $\text{COCCl}_3$ );  $m/z$  ( $\text{ESI}^+$ ) 470 ( $[\text{M}+\text{H}]^+$ , 45%), 326 (100); HRMS ( $\text{ESI}^+$ )  $\text{C}_{23}\text{H}_{26}^{35}\text{Cl}_3\text{NNaO}_3^+$  ( $[\text{M}+\text{Na}]^+$ ) requires 492.0870; found 492.0867.

**X-ray Crystal Structure Determination for **53****

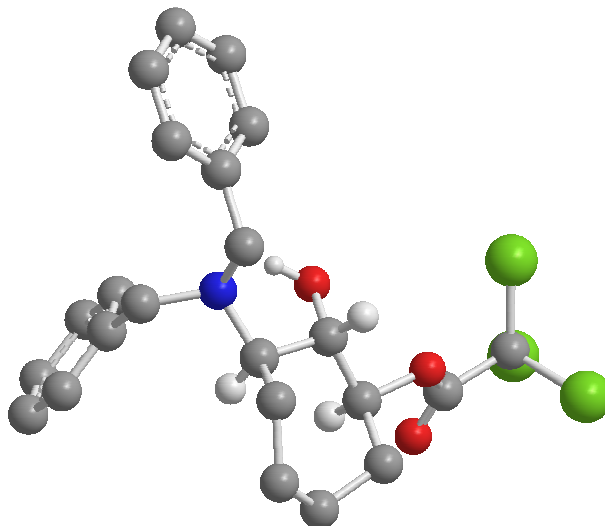

Data were collected using an Enraf-Nonius  $\kappa$ -CCD diffractometer with graphite monochromated Mo- $K\alpha$  radiation using standard procedures at 150 K. The structure was solved by direct methods (SIR92); all non-hydrogen atoms were refined with anisotropic thermal parameters. Hydrogen atoms were added at idealised positions. The structure was refined using CRYSTALS.<sup>27</sup>

X-ray crystal structure data for **53** [C<sub>23</sub>H<sub>26</sub>Cl<sub>3</sub>NO<sub>3</sub>]:  $M = 470.82$ , monoclinic, space group  $P 2_1/n$ ,  $a = 9.3961(4)$  Å,  $b = 14.0160(6)$  Å,  $c = 18.0227(9)$  Å,  $\beta = 99.271(2)^\circ$ ,  $V = 2342.51(18)$  Å<sup>3</sup>,  $Z = 4$ ,  $\mu = 0.415$  mm<sup>-1</sup>, colourless block, crystal dimensions =  $0.1 \times 0.1 \times 0.1$  mm<sup>3</sup>. A total of 5073 unique reflections were measured for  $5 < \theta < 27$  and 3687 reflections were used in the refinement. The final parameters were  $wR_2 = 0.078$  and  $R_1 = 0.047$  [ $I > 3.0\sigma(I)$ ]. Crystallographic data (excluding structure factors) has been deposited with the Cambridge Crystallographic Data Centre as supplementary publication number CCDC 733899. Copies of the data can be obtained, free of charge, on application to CCDC, 12 Union Road, Cambridge, CB2 1EZ, UK [fax: +44(0)-1223-336033 or e-mail: deposit@ccdc.cam.ac.uk].

**(1*RS*,2*RS*,3*SR*)-3-(*N,N*-Dibenzylamino)cycloheptane-1,2-diol **54****

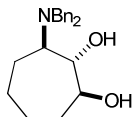

Following the *General Procedure*, K<sub>2</sub>CO<sub>3</sub> (138 mg, 1.0 mmol) and **53** (95.3 mg, 0.2 mmol) in MeOH (1 mL) gave **54** as a colourless oil that solidified on standing to a white crystalline solid (53.9 mg, 83%, >99:1 dr); mp 90-92 °C;  $\nu_{\max}$  (KBr) 3406 (O–H), 3086, 3064, 3028, 2934, 2863 (C–H), 1603, 1495, 1454;  $\delta_{\text{H}}$  (400 MHz, CDCl<sub>3</sub>) 1.35-1.59 (4H, m, CH<sub>2</sub>), 1.62-1.72 (1H, m, CH<sub>2</sub>), 1.74-1.84 (2H, m, CH<sub>2</sub>), 1.94-2.01 (1H, m, CH<sub>2</sub>), 2.40-2.47 (1H, m, C(3)H), 2.85 (1H, s, OH), 3.24-3.30 (1H, m, C(1)H), 3.34 (2H, d,  $J$  13.3, N(CH<sub>A</sub>H<sub>B</sub>Ph)<sub>2</sub>), 3.36-3.41 (1H, m, C(2)H), 3.85 (2H, d,  $J$  13.3, N(CH<sub>A</sub>H<sub>B</sub>Ph)<sub>2</sub>), 4.69 (1H, br s, OH), 7.23-7.38 (10H, m, Ph);  $\delta_{\text{C}}$  (100 MHz, CDCl<sub>3</sub>) 20.8, 21.5, 23.9, 29.9 (C(4)-C(7)), 53.2 (N(CH<sub>2</sub>Ph)<sub>2</sub>), 60.0 (C(3)), 75.9, 76.0 (C(1), (C(2))), 127.4 (*p*-Ph), 128.6, 129.1 (*o*-, *m*-Ph), 138.7 (*i*-Ph);  $m/z$  (ESI<sup>+</sup>) 326 ([M+H]<sup>+</sup>, 100%); HRMS (ESI<sup>+</sup>) C<sub>21</sub>H<sub>28</sub>NO<sub>2</sub><sup>+</sup> ([M+H]<sup>+</sup>) requires 326.2115; found 326.2120.

**(1*RS*,2*RS*,3*SR*)-1-*p*-Toluenesulfonyloxy-2-acetoxy-3-(*N,N*-dibenzylamino)cycloheptane **55****

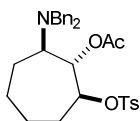

<sup>27</sup> Betteridge, P. W.; Carruthers, J. R.; Cooper, R. I.; Prout, C. K.; Watkin, D. J. CRYSTALS, 2001, Issue 11, Chemical Crystallography Laboratory, University of Oxford, UK.

Ac<sub>2</sub>O (345  $\mu$ L, 3.65 mmol) was added to solution of **52** (876 mg, 1.83 mmol), Et<sub>3</sub>N (305  $\mu$ L, 2.19 mmol) and DMAP (22.3 mg, 0.18 mmol) in CH<sub>2</sub>Cl<sub>2</sub> (20 mL), and the resultant mixture was stirred at rt for 18 h. The reaction mixture was then diluted with CH<sub>2</sub>Cl<sub>2</sub> (30 mL) and washed sequentially with sat. aq. NaHCO<sub>3</sub> (3  $\times$  50 mL) and sat. aq. CuSO<sub>4</sub> (3  $\times$  50 mL). The organic layer was dried and concentrated *in vacuo*. Purification *via* trituration from EtOH gave **55** as a white crystalline solid (765 mg, 80%, >99:1 dr); mp 119-120 °C (dec);  $\nu_{\text{max}}$  (KBr) 3085, 3062, 3028, 2932, 2864, 2805 (C–H), 1739 (C=O), 1599, 1495, 1454, 1371 (S=O), 1236 (C–O), 1177 (S=O);  $\delta_{\text{H}}$  (400 MHz, CDCl<sub>3</sub>) 1.08-1.20 (1H, m, CH<sub>2</sub>), 1.47-1.78 (5H, m, CH<sub>2</sub>), 1.88-2.02 (2H, m, CH<sub>2</sub>) overlapping 1.94 (3H, s, COMe), 2.25 (3H, s, ArMe), 2.63 (1H, app dd, *J* 9.9, 8.4, C(3)*H*), 3.22 (2H, d, *J* 13.6, N(CH<sub>A</sub>H<sub>B</sub>Ph)<sub>2</sub>), 3.50 (2H, d, *J* 13.6, N(CH<sub>A</sub>H<sub>B</sub>Ph)<sub>2</sub>), 4.66 (1H, app dd, *J* 8.1, 4.6, C(1)*H*), 5.03 (1H, dd, *J* 8.4, 4.6, C(2)*H*), 7.17-7.32 (12H, m, *Ar*, *Ph*), 7.79-7.83 (2H, m, *Ar*);  $\delta_{\text{C}}$  (100 MHz, CDCl<sub>3</sub>) 21.1, 21.5 (COMe, ArMe), 21.8, 22.2, 27.0, 28.6 (C(4)-C(7)), 53.5 (N(CH<sub>2</sub>Ph)<sub>2</sub>), 62.6 (C(3)), 74.8 (C(2)), 81.9 (C(1)), 126.9, 127.6, 128.1, 128.9, 129.9, 134.4, 139.7, 144.8 (*Ar*, *Ph*), 169.6 (COMe); *m/z* (ESI<sup>+</sup>) 522 ([M+H]<sup>+</sup>, 100%); HRMS (ESI<sup>+</sup>) C<sub>30</sub>H<sub>36</sub>NO<sub>5</sub>S<sup>+</sup> ([M+H]<sup>+</sup>) requires 522.2309; found 522.2298.

**(1*RS*,2*SR*,3*RS*)-3-(*N,N*-Dibenzylamino)cycloheptane-1,2-diol **58****

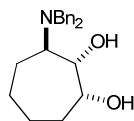

*From 52*: KOAc (53.4 mg, 0.54 mmol) was added to a stirred solution of **55** (189 mg, 0.36 mmol) in EtOH/H<sub>2</sub>O (v:v 6:1, 7.6 mL) and the resultant mixture was heated at reflux for 12 h. The reaction mixture was allowed to cool to rt then concentrated *in vacuo*. The residue was dissolved in Et<sub>2</sub>O (20 mL) and the resultant solution was washed with sat. aq. NaHCO<sub>3</sub> (3  $\times$  10 mL), then dried and concentrated *in vacuo* to give a 75:25 mixture of **56:57** as a colourless oil (132 mg). Data for **56**:  $\delta_{\text{H}}$  (400 MHz, CDCl<sub>3</sub>) 1.20-2.13 (8H, m, CH<sub>2</sub>) overlapping 1.74 (3H, s, COMe), 2.91 (1H, app td, *J* 9.5, 3.1, C(3)*H*), 3.37 (2H, d, *J* 13.2, N(CH<sub>A</sub>H<sub>B</sub>Ph)<sub>2</sub>), 3.66 (1H, dd, *J* 9.5, 2.4, C(2)*H*), 3.83 (2H, d, *J* 13.2, N(CH<sub>A</sub>H<sub>B</sub>Ph)<sub>2</sub>), 3.83 (1H, s, OH), 5.29-5.33 (1H, m, C(1)*H*), 7.21-7.39 (10H, m, *Ph*). Data for **57**:  $\delta_{\text{H}}$  (400 MHz, CDCl<sub>3</sub>) 1.20-2.13 (8H, m, CH<sub>2</sub>) overlapping 2.08 (3H, s, COMe), 2.79 (1H, ddd, *J* 10.2, 7.3, 2.7, C(3)*H*), 3.39 (2H, d, *J* 13.7, N(CH<sub>A</sub>H<sub>B</sub>Ph)<sub>2</sub>), 3.74 (2H, d, *J* 13.7, N(CH<sub>A</sub>H<sub>B</sub>Ph)<sub>2</sub>), 3.94-3.99 (1H, m, C(1)*H*), 5.41-5.46 (1H, m, C(2)*H*), 7.21-7.39 (10H, m, *Ph*). Following the *General Procedure*, transesterification with K<sub>2</sub>CO<sub>3</sub> (249 mg, 1.8 mmol) in MeOH (2 mL) gave **58** in >99:1 dr. Purification *via* flash column chromatography (gradient elution, 5%→40% EtOAc in 40-60 °C petrol) gave **58** as a colourless oil (115 mg, quant, >99:1 dr); *R<sub>f</sub>* 0.18 (40-60 °C petrol/EtOAc, 80:20);  $\nu_{\text{max}}$  (film) 3425 (O–H), 3085, 3062, 3028, 2929, 2859 (C–H), 1603, 1495,

1454, 1260, 1104, 1073, 1030;  $\delta_{\text{H}}$  (400 MHz,  $\text{CDCl}_3$ ) 1.30-1.84 (7H, m,  $\text{CH}_2$ ), 1.97-2.05 (1H, m,  $\text{CH}_2$ ), 2.46 (1H, s, OH), 2.85 (1H, app td,  $J$  9.8, 2.1, C(3) $H$ ), 3.37 (2H, d,  $J$  13.2,  $\text{N}(\text{CH}_A\text{H}_B\text{Ph})_2$ ), 3.50 (1H, dd,  $J$  9.8, 3.6, C(2) $H$ ), 3.82 (2H, d,  $J$  13.2,  $\text{N}(\text{CH}_A\text{H}_B\text{Ph})_2$ ), 4.08-4.13 (1H, m, C(1) $H$ ), 4.99 (1H, br s, OH), 7.24-7.36 (10H, m, Ph);  $\delta_{\text{C}}$  (100 MHz,  $\text{CDCl}_3$ ) 18.9, 22.1, 24.6, 28.6 (C(4)-C(7)), 53.4  $\text{N}(\text{CH}_2\text{Ph})_2$ , 56.7 (C(3)), 68.8 (C(1)), 73.7 (C(2)), 127.4 ( $p$ -Ph), 128.6, 129.2 ( $o$ -,  $m$ -Ph), 138.6 ( $i$ -Ph);  $m/z$  ( $\text{ESI}^+$ ) 326 ( $[\text{M}+\text{H}]^+$ , 100%); HRMS ( $\text{ESI}^+$ )  $\text{C}_{21}\text{H}_{28}\text{NO}_2^+$  ( $[\text{M}+\text{H}]^+$ ) requires 326.2115; found 326.2115.

**Dihydroxylation of 15:**  $\text{OsO}_4$  (4.4 mg, 1 mol%) was added to a stirred solution of **15** (500 mg, 1.72 mmol) and NMO (603 mg, 5.15 mmol) in acetone/ $\text{H}_2\text{O}$  (v:v 4:1, 13.2 mL) and the resultant mixture was stirred at rt for 4 h. Sat. aq.  $\text{Na}_2\text{SO}_3$  (10 mL) was then added and the solution was stirred for an additional 30 min. The reaction mixture was then concentrated *in vacuo* and dissolved in  $\text{CH}_2\text{Cl}_2$  (100 mL). The resultant solution was filtered through a short plug of silica (eluent  $\text{CH}_2\text{Cl}_2$ ) then dried and concentrated *in vacuo* to give an 83:17 mixture of **58**:**97**. Purification *via* flash column chromatography (gradient elution, 5%→40% EtOAc in 40-60 °C petrol) gave **97** as a yellow oil (21 mg, 4%, >99:1 dr);  $R_f$  0.08 (40-60 °C petrol/EtOAc, 80:20);  $\nu_{\text{max}}$  (film) 3418 (O-H), 3104, 3084, 3062, 3027, 3004, 2931, 2862, 2800 (C-H), 1602, 1493, 1453;  $\delta_{\text{H}}$  (400 MHz,  $\text{CDCl}_3$ ) 1.15-1.29 (1H, m,  $\text{CH}_2$ ), 1.41-1.79 (6H, m,  $\text{CH}_2$ ), 2.02-2.13 (1H, m,  $\text{CH}_2$ ), 2.77 (1H, ddd,  $J$  11.2, 3.9, 2.0, C(3) $H$ ), 3.51-3.58 (1H, m, CH), 3.76 (4H, AB system,  $J_{\text{AB}}$  14.4,  $\text{N}(\text{CH}_2\text{Ph})_2$ ), 4.23 (1H, app s, CH), 7.20-7.41 (10H, m, Ph);  $\delta_{\text{C}}$  (100 MHz,  $\text{CDCl}_3$ ) 21.6, 22.4, 24.9, 32.2 (C(4)-C(7)), 54.9 ( $\text{N}(\text{CH}_2\text{Ph})_2$ ), 56.8 (C(3)), 74.4, 75.2 (C(1), C(2)), 126.8 ( $p$ -Ph), 128.3, 128.5 ( $o$ -,  $m$ -Ph), 140.5 ( $i$ -Ph);  $m/z$  ( $\text{ESI}^+$ ) 326 ( $[\text{M}+\text{H}]^+$ , 100%); HRMS ( $\text{ESI}^+$ )  $\text{C}_{21}\text{H}_{28}\text{NO}_2^+$  ( $[\text{M}+\text{H}]^+$ ) requires 326.2115; found 326.2113. Further elution gave **58** as a yellow oil (137 mg, 24%, >99:1 dr).

### (1*RS*,2*RS*,3*SR*)-3-Aminocycloheptane-1,2-diol hydrochloride **59**

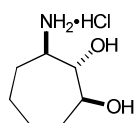

$\text{Pd}(\text{OH})_2/\text{C}$  (125 mg, 50% w/w) was added to a vigorously stirred solution of **54** (250 mg, 0.84 mmol) in degassed MeOH (5 mL) and the resultant suspension was stirred at rt under  $\text{H}_2$  (1 atm) for 4 h. The suspension was filtered through a pad of Celite<sup>®</sup> (eluent MeOH), the filtrate was acidified to pH 1 with conc. aq. HCl and concentrated *in vacuo* to give **59** as a white crystalline solid (129 mg, 93%, >99:1 dr); mp 168-171 °C;  $\nu_{\text{max}}$  (KBr) 3356 (O-H, N-H), 2938 (C-H);  $\delta_{\text{H}}$  (400 MHz,  $d_6$ -DMSO) 1.29-1.90 (8H, m,  $\text{CH}_2$ ), 2.85 (1H, app s, C(3) $H$ ), 3.22-3.31 (1H, m, C(2) $H$ ), 3.33-3.45 (1H, m, C(1) $H$ ), 4.94 (1H, d,  $J$  3.0, OH), 5.61 (1H, d,  $J$  4.3, OH), 7.96 (3H, br s,  $\text{NH}_3$ );  $\delta_{\text{C}}$  (100 MHz,  $\text{CDCl}_3$ ) 21.6, 24.2, 28.2, 31.7 (C(4)-C(7)), 55.0 (C(3)),

74.3 (C(1)), 78.3 (C(2));  $m/z$  (ESI<sup>+</sup>) 146 ([M-Cl]<sup>+</sup>, 100%); HRMS (ESI<sup>+</sup>) C<sub>7</sub>H<sub>16</sub>NO<sub>2</sub><sup>+</sup> ([M-Cl]<sup>+</sup>) requires 146.1176; found 146.1178.

**(1*RS*,2*SR*,3*RS*)-3-Aminocycloheptane-1,2-diol hydrochloride **60****

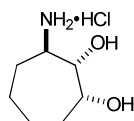

Pd(OH)<sub>2</sub>/C (61 mg, 50% w/w) was added to a vigorously stirred solution of **58** (123 mg, 0.38 mmol) in degassed MeOH (5 mL) and the resultant suspension was stirred at rt under H<sub>2</sub> (1 atm) for 4 h. The suspension was filtered through a pad of Celite<sup>®</sup> (eluent MeOH), the filtrate was acidified to pH 1 with conc. aq. HCl and concentrated *in vacuo* to give **60** as a yellow gum (69 mg, quant, >99:1 dr);  $\nu_{\max}$  (film) 3385 (O-H, N-H), 2933 (C-H);  $\delta_{\text{H}}$  (400 MHz, *d*<sub>6</sub>-DMSO) 1.31-1.92 (8H, m, CH<sub>2</sub>), 3.03-3.14 (1H, m, C(3)*H*), 3.48 (1H, app dd, *J* 9.1, 1.9, C(2)*H*), 3.92 (1H, app d, *J* 6.8, C(1)*H*), 3.92 (3H, br s, NH<sub>3</sub>);  $\delta_{\text{C}}$  (100 MHz, CDCl<sub>3</sub>) 22.9, 23.7, 29.2, 31.3 (C(4)-C(7)), 54.2 (C(3)), 72.0 (C(1)), 75.8 (C(2));  $m/z$  (ESI<sup>+</sup>) 146 ([M-Cl]<sup>+</sup>, 100%); HRMS (ESI<sup>+</sup>) C<sub>7</sub>H<sub>16</sub>NO<sub>2</sub><sup>+</sup> ([M-Cl]<sup>+</sup>) requires 146.1176; found 146.1178.

**(*RS*)-3-(Hydroxymethyl)cyclohex-1-ene **62****

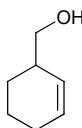

BuLi (1.6 M in hexanes, 200 mL, 320 mmol) was added to a degassed suspension of KO<sup>t</sup>Bu (33.9 g, 302 mmol) in cyclohexene **61** (270 mL, 2.7 mol) under an atmosphere of nitrogen. The reaction mixture was kept below 15 °C over a period of 2 h, and then allowed to warm to rt over 16 h. The resultant suspension was cooled to 0 °C and (CH<sub>2</sub>O)<sub>n</sub> (9.98 g, 332 mmol) was added (*Exothermic!*). The reaction mixture was heated to 60 °C for 3 h, then cooled to 0 °C and quenched with sat. aq. NaHCO<sub>3</sub> (200 mL). The mixture was extracted with CH<sub>2</sub>Cl<sub>2</sub> (3 × 200 mL). The combined organic extracts were washed sequentially with sat. aq. NaHCO<sub>3</sub> (200 mL) and brine (200 mL), dried and concentrated *in vacuo* to give **62** as a yellow oil (29.2 g, 86%) that was used without purification. Purification of an aliquot *via* flash column chromatography (gradient elution, 1%→70% Et<sub>2</sub>O in 30-40 °C petrol) gave an analytical sample;<sup>28</sup>  $\delta_{\text{H}}$  (400 MHz, CDCl<sub>3</sub>) 1.25-1.33 (1H, m, C(6)*H*<sub>A</sub>), 1.42-1.51 (1H, m, C(6)*H*<sub>B</sub>), 1.63-1.75 (2H, m, C(5)*H*<sub>2</sub>), 1.86-1.92 (2H, m,

<sup>28</sup> Clausen, R. P.; Bols, M. *J. Org. Chem.* **2000**, 65, 2797.

C(4) $H_2$ ), 2.20-2.21 (1H, m, C(3) $H$ ), 3.40 (2H, d,  $J$  6.4,  $CH_2OH$ ), 5.52-5.55 (1H, m,  $CH=CH$ ), 5.69-5.72 (1H, m,  $CH=CH$ ).

### (*RS*)-3-(Bromomethyl)cyclohex-1-ene **63**

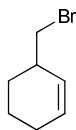

NBS (25.5 g, 143 mmol) was added to a stirred solution of **62** (11.1 g, 99 mmol) and  $PPh_3$  (36.3 g, 138 mmol) in  $CH_2Cl_2$  (150 mL) at 0 °C. The resultant mixture was stirred for 17 h at rt and then concentrated *in vacuo*. The residue was dissolved in 30-40 °C petrol/ $Et_2O$  (v:v 1:1) and filtered through a short plug of silica gel (eluent 30-40 °C petrol/ $Et_2O$ ) to give **63** as a colourless oil (13 g, 74%) that was used without purification;<sup>29</sup>  $\delta_H$  (400 MHz,  $CDCl_3$ ) 1.36-1.91 (6H, m, C(4) $H_2$ , C(5) $H_2$ , C(6) $H_2$ ), 2.44-2.57 (1H, m, C(3) $H$ ), 3.27-3.41 (2H, m,  $CH_2Br$ ), 5.56-5.64 (1H, m,  $CH=CH$ ), 5.78-5.87 (1H, m,  $CH=CH$ ).

### (*RS*)-3-(*N*-Benzylamino)methyl-cyclohex-1-ene **64**

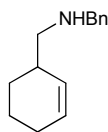

A stirred mixture of **63** (1.0 g, 5.71 mmol), benzylamine (5 mL, 45.7 mmol) and NaI (85 mg, 0.57 mmol) was heated at 50 °C for 20 h. The reaction mixture was cooled to rt and diluted with  $EtOAc$  (100 mL). The mixture was washed with 1 M aq. NaOH (100 mL) and the aqueous layer was extracted with  $EtOAc$  (2  $\times$  100 mL). The combined organic extracts were dried and concentrated *in vacuo*. Purification *via* flash column chromatography (eluent 30-40 °C petrol/ $Et_2O$ , 85:15) gave **64** as a yellow oil (700 mg, 61%);<sup>30</sup>  $\nu_{max}$  (film) 2931 (N-H), 1449 (C=C);  $\delta_H$  (400 MHz,  $CDCl_3$ ) 1.32-1.37 (1H, m, C(6) $H_A$ ), 1.52-1.58 (1H, m, C(5) $H_A$ ), 1.71-1.79 (1H, m, C(5) $H_B$ ), 1.80-1.86 (1H, m, C(6) $H_B$ ), 1.97-2.03 (2H, m, C(4) $H_2$ ), 2.30-2.36 (1H, m, C(3) $H$ ), 2.53-2.63 (2H, m, C(3) $CH_2N$ ), 3.79-3.86 (2H, m,  $NCH_2Ph$ ), 5.60-5.63 (1H, m,  $CH=CH$ ), 5.72-5.76 (1H, m,  $CH=CH$ ), 7.25-7.35 (5H, m,  $Ph$ );  $\delta_C$  (100 MHz,  $CDCl_3$ ) 21.2, 25.4, 27.2 (C(4), C(5), C(6)), 35.5 (C(3)), 54.0 (C(3) $CH_2N$ ), 54.6 ( $NCH_2Ph$ ), 126.9 (*p-Ph*), 128.1, 128.4, 128.5, 129.7 (C(1), C(2), *o-*, *m-Ph*), 140.3 (*i-Ph*);  $m/z$  (ESI<sup>+</sup>) 202 ( $[M+H]^+$ , 100%); HRMS (ESI<sup>+</sup>)  $C_{14}H_{20}N^+$  ( $[M+H]^+$ ) requires 202.1590; found 202.1596.

<sup>29</sup> Walton, J. C. *J. Chem. Soc., Perkin Trans. 2*, **1986**, 1641.

<sup>30</sup> Solé, D.; Cancho, Y.; Llebaria, A.; Moretó, J. M.; Delgado, A. *J. Org. Chem.* **1996**, 61, 5895.

## X-ray Crystal Structure Determination for **64•2,6-F<sub>2</sub>C<sub>6</sub>H<sub>3</sub>CO<sub>2</sub>H**

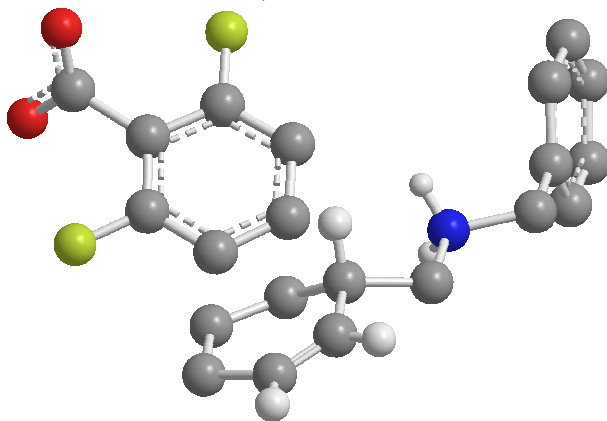

Data were collected using an Enraf-Nonius  $\kappa$ -CCD diffractometer with graphite monochromated Mo- $K\alpha$  radiation using standard procedures at 150 K. The structure was solved by direct methods (SIR92); all non-hydrogen atoms were refined with anisotropic thermal parameters. Hydrogen atoms were added at idealised positions. The structure was refined using CRYSTALS.<sup>31</sup>

X-ray crystal structure data for **64•2,6-F<sub>2</sub>C<sub>6</sub>H<sub>3</sub>CO<sub>2</sub>H** [C<sub>28</sub>H<sub>27</sub>F<sub>4</sub>NO<sub>4</sub>]:<sup>32</sup>  $M = 517.52$ , monoclinic, space group  $P\ 21/n$ ,  $a = 10.37900(10)\ \text{\AA}$ ,  $b = 13.8632(2)\ \text{\AA}$ ,  $c = 18.1137(2)\ \text{\AA}$ ,  $\beta = 102.1347(5)^\circ$ ,  $V = 2548.08(5)\ \text{\AA}^3$ ,  $Z = 4$ ,  $\mu = 0.109\ \text{mm}^{-1}$ , colourless plate, crystal dimensions =  $0.05 \times 0.2 \times 0.2\ \text{mm}^3$ . A total of 5832 unique reflections were measured for  $5 < \theta < 27$  and 3342 reflections were used in the refinement. The final parameters were  $wR_2 = 0.072$  and  $R_1 = 0.066$  [ $I > 3.0\sigma(I)$ ]. Crystallographic data (excluding structure factors) has been deposited with the Cambridge Crystallographic Data Centre as supplementary publication number CCDC 733900. Copies of the data can be obtained, free of charge, on application to CCDC, 12 Union Road, Cambridge CB2 1EZ, UK [fax: +44(0)-1223-336033 or e-mail: deposit@ccdc.cam.ac.uk].

## (*RS*)-3-(*N,N*-Dibenzylamino)methyl-cyclohex-1-ene **65**

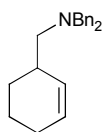

<sup>i</sup>Pr<sub>2</sub>NEt (1.1 mL, 6.26 mmol) and BnBr (0.74 mL, 6.26 mmol) were added sequentially to a stirred solution of **64** (840 mg, 4.17 mmol) in CH<sub>2</sub>Cl<sub>2</sub> (10 mL) at rt. The resultant solution was heated to 40 °C for 2 h and allowed to cool to rt. The reaction mixture was diluted with 2 M aq. KOH (20 mL) and extracted with Et<sub>2</sub>O (2 × 20 mL). The combined organic extracts were washed with brine (50 mL), dried and concentrated *in*

<sup>31</sup> Betteridge, P. W.; Carruthers, J. R.; Cooper, R. I.; Prout, C. K.; Watkin, D. J. CRYSTALS, 2001, Issue 11, Chemical Crystallography Laboratory, University of Oxford, UK.

<sup>32</sup> Compound **64•2,6-F<sub>2</sub>C<sub>6</sub>H<sub>3</sub>CO<sub>2</sub>H** co-crystallised with an additional molecule of 2,6-difluorobenzoic acid in the asymmetric unit.



*vacuo*. Purification *via* flash column chromatography (eluent 30-40 °C petrol/Et<sub>2</sub>O, 98:2) gave **65** as a colourless oil (1.05 g, 87%); Found C, 86.6; H, 8.7; N, 4.8%; C<sub>21</sub>H<sub>25</sub>N requires C, 86.55; H, 8.65; N, 4.8%;  $\nu_{\max}$  (film) 1451 (C=C);  $\delta_{\text{H}}$  (400 MHz, CDCl<sub>3</sub>) 1.28-1.35 (1H, m, C(6)*H*<sub>A</sub>), 1.48-1.61 (2H, m, C(5)*H*<sub>2</sub>), 1.86-1.90 (1H, m, C(6)*H*<sub>B</sub>), 1.93-1.99 (2H, m, C(4)*H*<sub>2</sub>), 2.32-2.37 (2H, m, C(3)*CH*<sub>2</sub>N), 2.40-2.45 (1H, m, C(3)*H*), 3.51 (2H, d, *J* 13.6, N(CH<sub>A</sub>H<sub>B</sub>Ph)<sub>2</sub>), 3.68 (2H, d, *J* 13.6, N(CH<sub>A</sub>H<sub>B</sub>Ph)<sub>2</sub>), 5.69-5.74 (2H, m, C(1)*H*, C(2)*H*), 7.24-7.43 (10H, m, *Ph*);  $\delta_{\text{C}}$  (100 MHz, CDCl<sub>3</sub>) 21.0 (C(6)), 25.5 (C(4)), 27.4 (C(5)), 33.4 (C(3)), 58.7 (N(CH<sub>2</sub>Ph)<sub>2</sub>), 59.3 (C(3)*CH*<sub>2</sub>N), 126.8 (*p-Ph*), 127.6 (CH=CH), 128.1, 128.9 (*o-*, *m-Ph*), 130.2 (CH=CH), 139.9 (*i-Ph*); *m/z* (ESI<sup>+</sup>) 292 ([M+H]<sup>+</sup>, 100%); HRMS (ESI<sup>+</sup>) C<sub>21</sub>H<sub>26</sub>N<sup>+</sup> ([M+H]<sup>+</sup>) requires 292.2060; found 292.2060.

**(1*RS*,2*SR*,3*RS*)- and (1*RS*,2*SR*,3*SR*)-1,2-Epoxy-3-hydroxymethyl-cyclohexane **66** and **67****

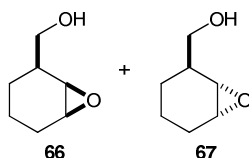

*m*CPBA (70%, 2.45 g, 9.94 mmol) was added to a stirred solution of **62** (744 mg, 6.63 mmol) in CH<sub>2</sub>Cl<sub>2</sub> (16 mL) at 0 °C. The reaction mixture was allowed to warm to rt over 1 h and then quenched with 10% aq. Na<sub>2</sub>SO<sub>3</sub> (10 mL) and sat. aq. NaHCO<sub>3</sub> (10 mL). The mixture was extracted with CH<sub>2</sub>Cl<sub>2</sub> (3 × 20 mL) and the combined organic extracts were washed sequentially with sat. aq. NaHCO<sub>3</sub> (50 mL) and brine (50 mL), dried and concentrated *in vacuo* to give a 76:24 mixture of **66**:**67**. Purification *via* flash column chromatography (gradient elution, 10%→90% Et<sub>2</sub>O in 30-40 °C petrol) gave a 76:24 mixture of **66**:**67** as a colourless oil (579 mg, 68%);  $\nu_{\max}$  (film) 3386 (N–H), 2935, 2864 (C–H), 1445, 1024; *m/z* (CI<sup>+</sup>) 129 ([M+H]<sup>+</sup>, 60%), 111 (100); C<sub>7</sub>H<sub>13</sub>O<sub>2</sub><sup>+</sup> ([M+H]<sup>+</sup>) requires 129.0910; found 129.0908.

Data for **66**:  $\delta_{\text{H}}$  (400 MHz, C<sub>6</sub>D<sub>6</sub>) 0.95-0.98 (1H, m, C(5)*H*<sub>A</sub>), 1.12-1.22 (2H, m, C(4)*H*<sub>2</sub>), 1.35-1.53 (2H, m, C(5)*H*<sub>B</sub>, C(6)*H*<sub>A</sub>), 1.70-1.76 (1H, m, C(6)*H*<sub>B</sub>), 1.83-1.86 (1H, m, C(3)*H*), 2.94 (1H, m, C(1)*H*), 3.16 (1H, m, C(2)*H*), 3.60-3.62 (1H, m, C(3)*CH*<sub>A</sub>H<sub>B</sub>OH), 3.75-3.80 (1H, m, C(3)*H*<sub>B</sub>H<sub>B</sub>OH);  $\delta_{\text{C}}$  (100 MHz, C<sub>6</sub>D<sub>6</sub>) 19.5, 21.9, 24.1 (C(4), C(5), C(6)), 37.6 (C(3)), 51.9 (C(1)), 53.4 (C(2)), 65.1 (C(3)*CH*<sub>2</sub>OH).

Data for **67**:  $\delta_{\text{H}}$  (400 MHz, C<sub>6</sub>D<sub>6</sub>) [selected peaks] 2.92-2.96 (1H, m, C(1)*H*), 3.30-3.49 (2H, m, C(3)*CH*<sub>2</sub>OH);  $\delta_{\text{C}}$  (100 MHz, C<sub>6</sub>D<sub>6</sub>) 17.5, 24.1, 30.1 (C(4), C(5), C(6)), 37.9 (C(3)), 52.3 (C(1)), 53.9 (C(2)), 65.0 (C(3)*CH*<sub>2</sub>OH).

### (*RS*)-3-(Methoxymethyl)cyclohex-1-ene **68**

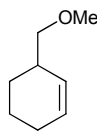

NaH (60% dispersion in mineral oil, 803 mg, 20.1 mmol) was added to a stirred solution of **62** (1.0 g, 8.92 mmol) in THF/DMF (v:v 4:1, 12.5 mL) at 0 °C. After 30 min, the reaction mixture was diluted with THF/DMF (v:v 11 mL/4.5 mL) and MeI (1.24 mL, 19.9 mmol) was added dropwise. The mixture was allowed to warm to rt and stirred for 48 h. The reaction was cooled to 0 °C, quenched with 2 M aq. KOH (20 mL) and allowed to warm to rt over 3 h. The mixture was extracted with Et<sub>2</sub>O (2 × 50 mL), and the combined organic extracts were washed sequentially with H<sub>2</sub>O (2 × 100 mL) and brine (50 mL), dried and concentrated *in vacuo*. Purification *via* flash column chromatography (gradient elution, 2%→50% Et<sub>2</sub>O in 30-40 °C petrol) gave **68** as a colourless oil (942 mg, 84%);  $\nu_{\text{max}}$  (film) 3019, 2979, 2862 (C–H), 1449 (C=C);  $\delta_{\text{H}}$  (400 MHz, CDCl<sub>3</sub>) 1.31-1.37 (1H, m, C(4)*H*<sub>A</sub>), 1.50-1.56 (1H, m, C(5)*H*<sub>A</sub>), 1.70-1.79 (2H, m, C(4)*H*<sub>B</sub>, C(5)*H*<sub>B</sub>), 1.93-1.99 (2H, m, C(6)*H*<sub>2</sub>), 2.36-2.39 (1H, m, C(3)*H*), 3.25-3.27 (2H, m, C(3)CH<sub>2</sub>O), 3.35 (3H, s, *OMe*), 5.56-5.63 (1H, m, CH=CH), 5.73-5.77 (1H, m, CH=CH);  $\delta_{\text{C}}$  (100 MHz, CDCl<sub>3</sub>) 20.1 (C(5)), 25.3 (C(6)), 25.9 (C(4)), 35.7 (C(3)), 58.8 (*OMe*), 77.1 (C(3)CH<sub>2</sub>O), 128.3, 128.6 (C(1), C(2)).<sup>33</sup>

### (1*RS*,2*SR*,3*RS*)- and (1*RS*,2*SR*,3*SR*)-1,2-Epoxy-3-methoxymethyl-cyclohexane **69** and **70**

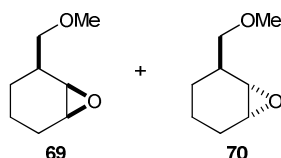

From a 76:24 mixture of **66:67**: NaH (60% dispersion in mineral oil, 356 mg, 8.9 mmol) was added to a stirred solution of a 76:24 mixture of **66:67** (571 mg, 4.45 mmol) in THF/DMF (v:v 3:1, 20 mL) at 0 °C. After 30 min, MeI (0.64 mL, 10.3 mmol) was added dropwise. The mixture was allowed to warm to rt and stirred for 48 h. The reaction was cooled to 0 °C, quenched with 2 M aq. KOH (6 mL) and allowed to warm to rt over 3 h. The mixture was extracted with Et<sub>2</sub>O (3 × 50 mL), and the combined organic extracts were washed sequentially with H<sub>2</sub>O (2 × 100 mL) and brine (50 mL), dried and concentrated *in vacuo* to give a 76:24 mixture of **69:70**. Purification *via* flash column chromatography (gradient elution, 2%→50% Et<sub>2</sub>O in 30-40 °C petrol) gave a 76:24 mixture of **69:70** as a colourless oil (591 mg, 93%);  $\nu_{\text{max}}$  (film) 2981, 2934, 2865 (C–H), 872 (C–O, epoxide), 771 (C–O epoxide);  $m/z$  (CI<sup>+</sup>) 143 ([M+H]<sup>+</sup>, 100%); HRMS (ESI<sup>+</sup>) C<sub>8</sub>H<sub>15</sub>O<sub>2</sub><sup>+</sup> ([M+H]<sup>+</sup>) requires 143.1067; found 143.1069.

<sup>33</sup> Compound **68** did not yield to analysis by mass spectrometry under a range of ionisation conditions.

Data for **69**:  $\delta_{\text{H}}$  (400 MHz,  $\text{C}_6\text{D}_6$ ) [selected peaks] 2.00-2.09 (1H, m, C(3)*H*), 2.92-2.95 (1H, m, C(1)*H*), 3.16-3.21 (1H, m, C(2)*H*), 3.24 (3H, s, *OMe*), 3.25-3.31 (1H, m, C(3)*CH*<sub>A</sub>*H*<sub>B</sub>O), 3.49-3.55 (1H, m, C(3)*CH*<sub>A</sub>*H*<sub>B</sub>O);  $\delta_{\text{C}}$  (100 MHz,  $\text{C}_6\text{D}_6$ ) 19.6, 22.2, 24.2 (C(4), C(5), C(6)), 35.9 (C(3)), 51.7, 53.0 (C(1), C(2)), 58.6 (*OMe*), 75.2 (C(3)*CH*<sub>2</sub>O).

Data for **70**:  $\delta_{\text{H}}$  (400 MHz,  $\text{C}_6\text{D}_6$ ) [selected peaks] 2.14-2.24 (1H, m, C(3)*H*), 2.98-3.01 (1H, m, C(1)*H*), 3.07-3.14 (3H, m, C(2)*H*, C(3)*CH*<sub>2</sub>O), 3.15 (3H, s, *OMe*);  $\delta_{\text{C}}$  (100 MHz,  $\text{C}_6\text{D}_6$ ) 17.5, 24.4, 25.2 (C(4), C(5), C(6)), 35.5 (C(3)), 52.0, 53.9 (C(1), C(2)), 58.5 (*OMe*), 75.1 (C(3)*CH*<sub>2</sub>O).

From **68**: *m*CPBA (72%, 413 mg, 1.72 mmol) was added to a stirred solution of **68** (145 mg, 1.15 mmol) in  $\text{CH}_2\text{Cl}_2$  (3.2 mL) at 0 °C. The reaction mixture was allowed to warm to rt over 2.5 h and then quenched with 10% aq.  $\text{Na}_2\text{SO}_3$  (5 mL) and sat. aq.  $\text{NaHCO}_3$  (5 mL). The mixture was extracted with  $\text{CH}_2\text{Cl}_2$  (3 × 5 mL) and the combined organic extracts were washed sequentially with sat. aq.  $\text{NaHCO}_3$  (2 × 10 mL) and brine (10 mL), dried and concentrated *in vacuo* to give a 58:42 mixture of **69:70**. Purification *via* flash column chromatography (gradient elution, 2%→50%  $\text{Et}_2\text{O}$  in 30-40 °C petrol) gave a 58:42 mixture of **69:70** as a colourless oil (66 mg, 40%).

#### (1*RS*,2*RS*,3*SR*)-3-(*N*-Benzylamino)methyl-cyclohexane-1,2-diol **71**

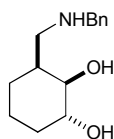

$\text{Cl}_3\text{CCO}_2\text{H}$  (486 mg, 2.98 mmol) was added to a stirred solution of **64** (150 mg, 0.75 mmol) in  $\text{CH}_2\text{Cl}_2$  (2.1 mL) and the resultant mixture was stirred at rt for 5 min. *m*CPBA (74%, 486 mg, 2.98 mmol) was then added in one portion and the reaction mixture was stirred at rt for 21 h. The mixture was then diluted with  $\text{CH}_2\text{Cl}_2$  (10 mL) and sat. aq.  $\text{Na}_2\text{SO}_3$  was added until starch-iodide paper indicated no remaining peracid. Sat. aq.  $\text{NaHCO}_3$  (10 mL) was then added and the layers were separated. The organic extracts were washed with sat. aq.  $\text{NaHCO}_3$  (2 × 10 mL), dried and concentrated *in vacuo*. Following the *General Procedure*, transesterification with  $\text{K}_2\text{CO}_3$  (1.02 g, 7.4 mmol) in MeOH (5 mL) gave **71** (95:5 dr) as a yellow oil;  $\nu_{\text{max}}$  (film) 3373 (O–H, N–H), 2931 (C–H), 1657, 1452, 1149;  $\delta_{\text{H}}$  (500 MHz,  $\text{CDCl}_3$ ) 1.22-1.40 (2H, m, C(4)*H*<sub>A</sub>, C(5)*H*<sub>A</sub>), 1.47-1.50 (1H, m, C(6)*H*<sub>A</sub>), 1.55-1.57 (2H, m, C(5)*H*<sub>B</sub>, C(6)*H*<sub>B</sub>), 1.95-1.98 (1H, m, C(4)*H*<sub>B</sub>), 2.23-2.27 (1H, m, C(1)*H*), 2.75 (1H, dd, *J* 14.5, 1.5, C(3)*CH*<sub>A</sub>*H*<sub>B</sub>N), 3.02 (1H, dd, *J* 14.5, 11.5, C(3)*CH*<sub>A</sub>*H*<sub>B</sub>N), 3.52 (1H, dd, *J* 8.2, 4.4, C(2)*H*), 3.64-3.68 (1H, m, C(3)*H*), 3.66 (1H, d, *J* 13.1, *NCH*<sub>A</sub>*H*<sub>B</sub>Ph), 3.81 (1H, d, *J* 13.1, *NCH*<sub>A</sub>*H*<sub>B</sub>), 7.25-7.35 (5H, m, *Ph*);  $\delta_{\text{C}}$  (125 MHz,  $\text{CDCl}_3$ ) 20.0 (C(5)), 27.6 (C(6)), 31.1 (C(4)), 37.0 (C(1)), 51.4 (C(3)*CH*<sub>2</sub>N), 53.9 (*NCH*<sub>2</sub>Ph), 71.1 (C(3)), 77.9 (C(2)), 127.4 (*p*-*Ph*), 128.2, 128.6 (*o*-, *m*-*Ph*),

138.8 (*i*-Ph);  $m/z$  (ESI<sup>+</sup>) 236 ([M+H]<sup>+</sup>, 100%); HRMS (CI<sup>+</sup>) C<sub>14</sub>H<sub>22</sub>NO<sub>2</sub><sup>+</sup> ([M+H]<sup>+</sup>) requires 236.1645; found 236.1646.

**(1*RS*,2*RS*,3*SR*)-3-(*N,N*-Dibenzylamino)methyl-cyclohexane-1,2-diol **75****

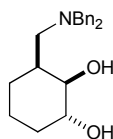

*Dihydroxylation of 65*: Cl<sub>3</sub>CCO<sub>2</sub>H (4.20 g, 25.7 mmol) was added to a stirred solution of **65** (1.5 g, 5.15 mmol) in CH<sub>2</sub>Cl<sub>2</sub> (14 mL) and the resultant mixture was stirred at rt for 30 min. *m*CPBA (70%, 1.90 g, 7.71 mmol) was then added in one portion and the reaction mixture was stirred at rt for 21 h. The mixture was then diluted with CH<sub>2</sub>Cl<sub>2</sub> (20 mL) and sat. aq. Na<sub>2</sub>SO<sub>3</sub> was added until starch-iodide paper indicated no remaining peracid. Sat. aq. NaHCO<sub>3</sub> (150 mL) was then added and the layers were separated. The organic layer was washed with sat. aq. NaHCO<sub>3</sub> (2 × 100 mL), dried and concentrated *in vacuo*. Following the *General Procedure*, transesterification with K<sub>2</sub>CO<sub>3</sub> (3.55 g, 25.7 mmol) in MeOH (80 mL) gave **75** in 90:10 dr. Purification *via* exhaustive flash column chromatography (gradient elution, 7%→60% EtOAc in 30-40 °C petrol) gave **75** as a white solid (916 mg, 55%, >99:1 dr) and a sample of **76** contaminated with trace amounts (<5%) of unknown impurities (63 mg, ~4%).

Data for **75**: mp 83-85 °C;  $\nu_{\max}$  (film) 3356 (O-H);  $\delta_{\text{H}}$  (400 MHz, CDCl<sub>3</sub>) 1.09-1.14 (2H, m, C(5)*H*<sub>2</sub>), 1.26-1.29 (1H, m, C(6)*H*<sub>A</sub>), 1.43-1.49 (2H, m, C(4)*H*<sub>2</sub>), 1.71-1.78 (1H, m, C(6)*H*<sub>B</sub>), 2.20-2.24 (1H, m, C(3)*H*), 2.55-2.60 (1H, br s, *OH*), 2.60-2.70 (2H, m, C(3)*CH*<sub>2</sub>N), 3.07-3.15 (3H, m, C(1)*H*, N(*CH*<sub>A</sub>*H*<sub>B</sub>Ph)<sub>2</sub>), 3.36-3.39 (1H, m, C(2)*H*), 4.05-4.09 (2H, m, N(*CH*<sub>A</sub>*H*<sub>B</sub>Ph)<sub>2</sub>), 6.78-6.99 (1H, br s, *OH*), 7.27-7.42 (10H, m, *Ph*);  $\delta_{\text{C}}$  (100 MHz, CDCl<sub>3</sub>) 19.9 (C(5)), 28.5 (C(4)), 31.7 (C(6)), 33.7 (C(3)), 54.7 (C(3)*CH*<sub>2</sub>N), 58.9 (N(*CH*<sub>2</sub>Ph)<sub>2</sub>), 70.6 (C(1)), 76.7 (C(2)), 127.7 (*p*-Ph), 128.6, 129.6 (*o*-, *m*-Ph), 137.4 (*i*-Ph);  $m/z$  (ESI<sup>+</sup>) 326 ([M+H]<sup>+</sup>, 100%); HRMS (ESI<sup>+</sup>) C<sub>21</sub>H<sub>28</sub>NO<sub>2</sub><sup>+</sup> ([M+H]<sup>+</sup>) requires 326.2115; found 326.2114.

## X-ray Crystal Structure Determination for **75**

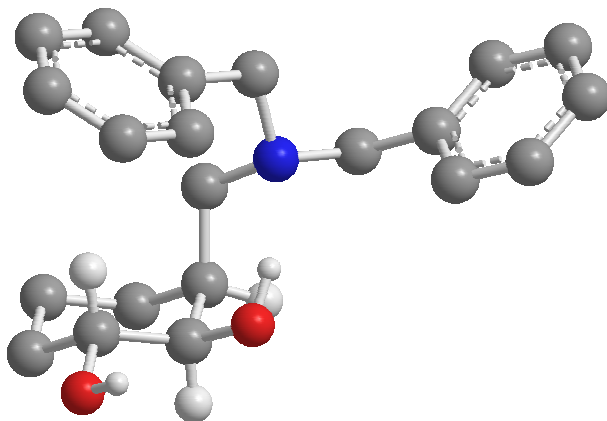

Data were collected using an Enraf-Nonius  $\kappa$ -CCD diffractometer with graphite monochromated Mo- $K\alpha$  radiation using standard procedures at 150 K. The structure was solved by direct methods (SIR92); all non-hydrogen atoms were refined with anisotropic thermal parameters. Hydrogen atoms were added at idealised positions. The structure was refined using CRYSTALS.<sup>34</sup>

X-ray crystal structure data for **75** [C<sub>21</sub>H<sub>27</sub>NO<sub>2</sub>]:  $M = 325.45$ , monoclinic, space group  $P 2_1/n$ ,  $a = 10.9893(3) \text{ \AA}$ ,  $b = 13.7910(3) \text{ \AA}$ ,  $c = 12.2178(4) \text{ \AA}$ ,  $\beta = 102.4024(11)^\circ$ ,  $V = 1808.44(9) \text{ \AA}^3$ ,  $Z = 4$ ,  $\mu = 0.076 \text{ mm}^{-1}$ , colourless block, crystal dimensions =  $0.3 \times 0.3 \times 0.3 \text{ mm}^3$ . A total of 4097 unique reflections were measured for  $5 < \theta < 27$  and 2235 reflections were used in the refinement. The final parameters were  $wR_2 = 0.037$  and  $R_1 = 0.038$  [ $I > 3.0\sigma(I)$ ]. Crystallographic data (excluding structure factors) has been deposited with the Cambridge Crystallographic Data Centre as supplementary publication number CCDC 733901. Copies of the data can be obtained, free of charge, on application to CCDC, 12 Union Road, Cambridge, CB2 1EZ, UK [fax: +44(0)-1223-336033 or e-mail: deposit@ccdc.cam.ac.uk].

## (1*RS*,2*SR*,3*RS*)-1,2-Epoxy-3-(*N,N*-dibenzylamino)methyl-cyclohexane **79**

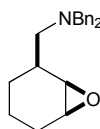

Anhydrous TsOH (8.95 g, 52 mmol) was added to a stirred solution of **65** (5.05 g, 17.3 mmol) in CH<sub>2</sub>Cl<sub>2</sub> (48 mL) at rt and stirred for 30 min. *m*CPBA (72%, 6.65 g, 27.7 mmol) was added in one portion and the reaction mixture was stirred at rt for a further 22 h. The reaction was quenched with 10% aq. Na<sub>2</sub>SO<sub>3</sub> (50 mL) and sat. aq. NaHCO<sub>3</sub> (100 mL). The mixture was extracted with CH<sub>2</sub>Cl<sub>2</sub> (3  $\times$  100 mL) and the combined organic extracts were washed sequentially with sat. aq. NaHCO<sub>3</sub> (300 mL) and brine (300 mL), dried, and concentrated *in vacuo* to give a 10:75:15 mixture of **75**:**77**:**78** as an oil (6.46 g) which was used

<sup>34</sup> Betteridge, P. W.; Carruthers, J. R.; Cooper, R. I.; Prout, C. K.; Watkin, D. J. CRYSTALS, 2001, Issue 11, Chemical Crystallography Laboratory, University of Oxford, UK.

without purification. The 10:75:15 mixture of **75:77:78** (6.46 g) was dissolved in CH<sub>2</sub>Cl<sub>2</sub> (100 mL) and the solution was cooled to 0 °C. DBU (2.9 mL, 19.4 mmol) was added and the reaction mixture was stirred for 15 h. The reaction was quenched with 10% aq. CuSO<sub>4</sub> (100 mL). The mixture was extracted with CH<sub>2</sub>Cl<sub>2</sub> (3 × 50 mL) and the combined organic extracts were washed sequentially with 10% aq. CuSO<sub>4</sub> (200 mL) and brine (200 mL), dried, and concentrated *in vacuo* to give a 10:4:75:11 mixture of **75:78:79:80**. Purification *via* exhaustive flash column chromatography (gradient eluent, 1%→10% Et<sub>2</sub>O in 30-40 °C petrol) gave **79** as a white solid (877 mg, 17%, >99:1 dr) and an 86:14 mixture of **79:80** as a white solid (1.67 g, 31%).

Data for **79**: Found C, 81.8; H, 8.2; N, 4.6%; C<sub>21</sub>H<sub>25</sub>NO requires C, 82.0; H, 8.2; N, 4.6%; mp 43-45 °C;  $\nu_{\max}$  (KBr) 912, 746 (C–O);  $\delta_{\text{H}}$  (400 MHz, CDCl<sub>3</sub>) 1.09-1.15 (2H, m, C(5)*H*<sub>2</sub>), 1.39-1.44 (2H, m, C(4)*H*<sub>2</sub>), 1.78-1.88 (2H, m, C(6)*H*<sub>2</sub>), 2.06-2.09 (1H, m, C(3)*H*), 2.46-2.50 (1H, m, C(3)*CH*<sub>A</sub>*H*<sub>B</sub>N), 2.65-2.69 (1H, m, C(3)*CH*<sub>A</sub>*H*<sub>B</sub>N), 3.17-3.18 (1H, m, C(1)*H*), 3.26-3.28 (1H, m, C(2)*H*), 3.62-3.69 (4H, m, N(CH<sub>2</sub>Ph)<sub>2</sub>), 7.25-7.42 (10H, m, *Ph*);  $\delta_{\text{C}}$  (100 MHz, CDCl<sub>3</sub>) 19.7 (C(5)), 23.4 (C(4)), 24.0 (C(6)), 33.7 (C(3)), 52.7 (C(1)), 54.9 (C(2)), 57.1 (C(3)CH<sub>2</sub>N), 59.0 (N(CH<sub>2</sub>Ph)<sub>2</sub>), 126.9 (*p-Ph*), 128.2, 128.8 (*o-*, *m-Ph*), 139.5 (*i-Ph*); *m/z* (ESI<sup>+</sup>) 308 ([M+H]<sup>+</sup>, 100%); HRMS (ESI<sup>+</sup>) C<sub>21</sub>H<sub>26</sub>NO<sup>+</sup> ([M+H]<sup>+</sup>) requires 308.2009; found 308.2013.

*Ring-opening of 79 with Cl<sub>3</sub>CCO<sub>2</sub>H*: Anhydrous Cl<sub>3</sub>CCO<sub>2</sub>H (265 mg, 1.63 mmol) was added to a stirred solution of **79** (100 mg, 0.33 mmol) in CH<sub>2</sub>Cl<sub>2</sub> (1.5 mL) at rt and stirred for 2 h. The reaction was quenched with sat. aq. NaHCO<sub>3</sub> (1.5 mL) and the mixture was extracted with CH<sub>2</sub>Cl<sub>2</sub> (3 × 10 mL). The combined organic extracts were washed sequentially with sat. aq. NaHCO<sub>3</sub> (30 mL) and brine (30 mL), dried and concentrated *in vacuo*. Following the *General Procedure*, transesterification with K<sub>2</sub>CO<sub>3</sub> (225 mg, 1.63 mmol) in MeOH (4 mL) gave a 95:5 mixture of **75:76**. Purification *via* flash column chromatography (gradient elution, 20%→60% EtOAc in 30-40 °C petrol) gave a 95:5 mixture of **75:76** as a colourless oil (106 mg, quant).

*Ring-opening of 79 with TsOH*: Anhydrous TsOH (168 mg, 0.98 mmol) was added to a stirred solution of **79** (100 mg, 0.33 mmol) in CH<sub>2</sub>Cl<sub>2</sub> (1.5 mL) at rt and stirred for 3 h. The reaction was quenched with sat. aq. NaHCO<sub>3</sub> (1.5 mL) and the mixture was extracted with CH<sub>2</sub>Cl<sub>2</sub> (3 × 10 mL). The combined organic extracts were washed sequentially with sat. aq. NaHCO<sub>3</sub> (30 mL) and brine (30 mL), dried and concentrated *in vacuo* to give **77** in >99:1 dr. Purification *via* flash column chromatography (gradient elution, 5%→30% EtOAc in 30-40 °C petrol) gave **77** as a colourless oil (150 mg, 96%, >99:1 dr);  $\nu_{\max}$  (film) 3347 (O–H);  $\delta_{\text{H}}$  (400 MHz, CDCl<sub>3</sub>) 1.28-1.78 (4H, m, C(4)*H*<sub>2</sub>, C(5)*H*<sub>2</sub>), 2.11-2.15 (2H, m, C(3)CH<sub>2</sub>N), 2.26-2.33 (1H, m, C(6)*H*<sub>A</sub>), 2.43 (3H, s, *ArMe*), 2.56-2.64 (1H, m, C(6)*H*<sub>B</sub>), 3.12-4.11 (4H, m, N(CH<sub>2</sub>Ph)<sub>2</sub>), 3.20-3.27 (1H, m, C(3)*H*), 3.90-3.93 (1H, m, C(2)*H*), 4.48-4.51 (1H, m, C(1)*H*), 7.23-7.45 (14H, m, *Ph*, *Ar*);  $\delta_{\text{C}}$  (100 MHz, CDCl<sub>3</sub>) 19.5

(C(4)), 21.7 (ArMe), 27.0 (C(5)), 33.7 (C(6)), 52.7 (C(3)CH<sub>2</sub>N), 54.8 (N(CH<sub>2</sub>Ph)<sub>2</sub>), 58.7 (C(3)), 70.6 (C(2)), 80.7 (C(1)), 127.5, 127.8, 128.5, 129.1, 129.7, 134.3, 138.7, 144.4 (*Ph*, *Ar*); *m/z* (ESI<sup>+</sup>) 480 ([M+H]<sup>+</sup>, 100%); HRMS (ESI<sup>+</sup>) C<sub>28</sub>H<sub>34</sub>NO<sub>4</sub>S<sup>+</sup> ([M+H]<sup>+</sup>) requires 480.2203; found 480.2208.

**(1*RS*,2*RS*,3*SR*)-1-Acetoxy-2-hydroxy-3-(*N,N*-dibenzylamino)methyl-cyclohexane **81****

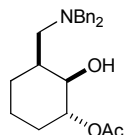

A solution of **79** (100 mg, 0.33 mmol) in AcOH (2 mL) was stirred at rt for 12 h. The reaction was quenched with sat. aq. NaHCO<sub>3</sub> (5 mL) and the mixture was extracted with CH<sub>2</sub>Cl<sub>2</sub> (3 × 10 mL). The combined organic extracts were washed sequentially with sat. aq. NaHCO<sub>3</sub> (30 mL) and brine (30 mL), dried and concentrated *in vacuo* to give **81** in 95:5 dr. Purification *via* flash column chromatography (eluent 30-40 °C petrol/EtOAc, 4:1) gave **81** as a white solid (108 mg, 90%, >99:1 dr); mp 77-80 °C; *v*<sub>max</sub> (film) 3409 (O–H), 1733 (C=O); δ<sub>H</sub> (400 MHz, CDCl<sub>3</sub>) 1.32-1.34 (2H, m, C(4)*H*<sub>2</sub>), 1.40-1.45 (2H, m, C(6)*H*<sub>2</sub>), 1.82-1.87 (2H, m, C(5)*H*<sub>2</sub>), 2.05 (3H, s, COMe), 2.25-2.30 (1H, m, C(3)CH<sub>A</sub>H<sub>B</sub>N), 2.34-2.37 (1H, m, C(3)*H*), 2.86-2.92 (1H, m, C(3)CH<sub>A</sub>H<sub>B</sub>N), 3.24-3.27 (2H, m, N(CH<sub>A</sub>H<sub>B</sub>Ph)<sub>2</sub>), 3.80-3.83 (1H, m, C(2)*H*), 3.87-3.90 (2H, m, N(CH<sub>A</sub>H<sub>B</sub>Ph)<sub>2</sub>), 4.54-4.59 (1H, m, C(1)*H*), 4.82-5.10 (1H, br s, OH), 7.27-7.37 (10H, m, *Ph*); δ<sub>C</sub> (100 MHz, CDCl<sub>3</sub>) 19.8 (C(4)), 21.4 (C(6)), 26.6 (COMe), 28.1 (C(5)), 34.7 (C(3)), 55.2 (C(3)CH<sub>2</sub>N), 58.9 (N(CH<sub>2</sub>Ph)<sub>2</sub>), 72.1 (C(2)), 73.4 (C(1)), 127.4 (*p-Ph*), 128.6, 129.2 (*o-*, *m-Ph*), 138.2 (*i-Ph*), 170.4 (COMe); *m/z* (ESI<sup>+</sup>) 368 ([M+H]<sup>+</sup>, 100%); HRMS (ESI<sup>+</sup>) C<sub>23</sub>H<sub>30</sub>NO<sub>3</sub><sup>+</sup> ([M+H]<sup>+</sup>) requires 368.2220; found 368.2226.

**X-ray Crystal Structure Determination for **81****

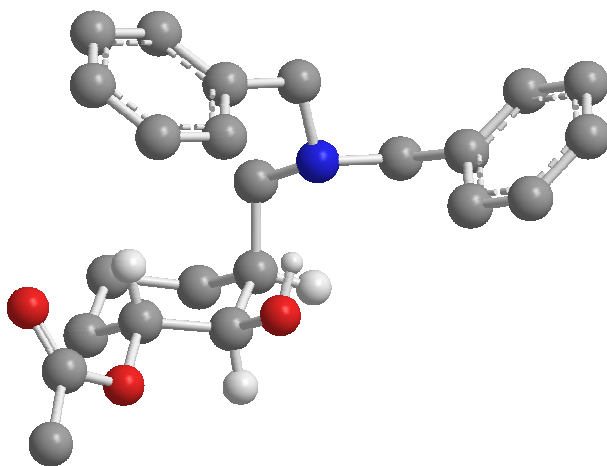

Data were collected using an Enraf-Nonius κ-CCD diffractometer with graphite monochromated Mo-*K*α radiation using standard procedures at 150 K. The structure was solved by direct methods (SIR92); all non-

hydrogen atoms were refined with anisotropic thermal parameters. Hydrogen atoms were added at idealised positions. The structure was refined using CRYSTALS.<sup>35</sup>

X-ray crystal structure data for **81** [C<sub>23</sub>H<sub>29</sub>NO<sub>3</sub>]:  $M = 367.49$ , triclinic, space group  $P-1$ ,  $a = 6.1629(4)$  Å,  $b = 10.0202(7)$  Å,  $c = 16.9326(13)$  Å,  $\alpha = 96.357(3)^\circ$ ,  $\beta = 93.842(2)^\circ$ ,  $\gamma = 103.221(3)^\circ$ ,  $V = 1007.06(12)$  Å<sup>3</sup>,  $Z = 2$ ,  $\mu = 0.079$  mm<sup>-1</sup>, colourless plate, crystal dimensions =  $0.05 \times 0.1 \times 0.3$  mm<sup>3</sup>. A total of 3963 unique reflections were measured for  $5 < \theta < 27$  and 2525 reflections were used in the refinement. The final parameters were  $wR_2 = 0.049$  and  $R_1 = 0.050$  [ $I > 2.0\sigma(I)$ ]. Crystallographic data (excluding structure factors) has been deposited with the Cambridge Crystallographic Data Centre as supplementary publication number CCDC 733902. Copies of the data can be obtained, free of charge, on application to CCDC, 12 Union Road, Cambridge, CB2 1EZ, UK [fax: +44(0)-1223-336033 or e-mail: deposit@ccdc.cam.ac.uk].

*Transesterification of 81*: Following the *General Procedure*, K<sub>2</sub>CO<sub>3</sub> (197 mg, 1.43 mmol) and **81** (105 mg, 0.29 mmol) in MeOH (2 mL) gave the crude reaction mixture. Purification *via* flash column chromatography (gradient elution, 7%→60% EtOAc in 30-40 °C petrol) gave **75** as a white solid (73 mg, 79%, >99:1 dr).

**(1*RS*,2*RS*,3*SR*)-1-Acetoxy-2-methanesulfonyloxy-3-(*N,N*-dibenzylamino)methyl-cyclohexane **82****

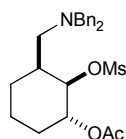

MsCl (0.1 mL, 1.29 mmol) was added to a stirred solution of **81** (319 mg, 0.87 mmol), Et<sub>3</sub>N (0.4 mL, 2.87 mmol) in CH<sub>2</sub>Cl<sub>2</sub> (5 mL) at 0 °C and the resultant solution was stirred for 1 h. The reaction was quenched with sat. aq. NaHCO<sub>3</sub> (5 mL) and the mixture was extracted with CH<sub>2</sub>Cl<sub>2</sub> (3 × 10 mL). The combined organic extracts were washed sequentially with sat. aq. NaHCO<sub>3</sub> (30 mL) and brine (30 mL), dried and concentrated *in vacuo*. Purification *via* flash column chromatography (gradient elution, 5%→40% EtOAc in 30-40 °C petrol) gave **82** as colourless oil (374 mg, 97%, >99:1 dr);  $\nu_{\max}$  (film) 1740 (C=O);  $\delta_{\text{H}}$  (400 MHz, CDCl<sub>3</sub>) 1.20-1.31 (1H, m, C(5)*H*<sub>A</sub>), 1.32-1.42 (1H, m, C(5)*H*<sub>B</sub>), 1.47-1.65 (3H, m, C(4)*H*<sub>2</sub>, C(6)*H*<sub>A</sub>), 1.78-1.89 (1H, m, C(6)*H*<sub>B</sub>), 2.04 (3H, s, COMe), 2.18-2.29 (1H, m, C(3)*H*), 2.49 (1H, dd,  $J$  12.7, 9.1, C(3)*CH*<sub>A</sub>*H*<sub>B</sub>N), 2.57 (1H, dd,  $J$  12.7, 5.3, C(3)*CH*<sub>A</sub>*H*<sub>B</sub>N), 2.88 (3H, s, SO<sub>2</sub>Me), 3.43 (2H, d,  $J$  13.6, N(*CH*<sub>A</sub>*H*<sub>B</sub>Ph)<sub>2</sub>), 3.74 (2H, d,  $J$  13.6, N(*CH*<sub>A</sub>*H*<sub>B</sub>Ph)<sub>2</sub>), 4.73 (1H, dd,  $J$  6.0, 3.4, C(2)*H*), 4.97-5.02 (1H, m, C(1)*H*), 7.23-7.40 (10H, m, *Ph*);  $\delta_{\text{C}}$  (100 MHz, CDCl<sub>3</sub>) 18.8 (C(5)), 21.2 (COMe), 24.6, 27.0 (C(4), C(6)), 35.8 (C(3)), 38.2 (SO<sub>2</sub>Me), 53.5 (C(3)*CH*<sub>2</sub>N), 59.0 (N(*CH*<sub>2</sub>Ph)<sub>2</sub>), 69.6 (C(1)), 80.0 (C(2)), 127.0 (*p-Ph*),

<sup>35</sup> Betteridge, P. W.; Carruthers, J. R.; Cooper, R. I.; Prout, C. K.; Watkin, D. J. CRYSTALS, 2001, Issue 11, Chemical Crystallography Laboratory, University of Oxford, UK.



128.3, 129.0 (*o*-, *m*-*Ph*), 139.4 (*i*-*Ph*), 169.8 (COMe);  $m/z$  (ESI<sup>+</sup>) 446 ([M+H]<sup>+</sup>, 100%); HRMS (ESI<sup>+</sup>) C<sub>24</sub>H<sub>32</sub>NO<sub>5</sub>S<sup>+</sup> ([M+H]<sup>+</sup>) requires 446.1996; found 446.2013.

**(1*RS*,2*SR*,3*SR*)-1,2-Epoxy-3-(*N,N*-dibenzylamino)methyl-cyclohexane **80****

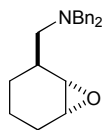

Following the *General Procedure*, K<sub>2</sub>CO<sub>3</sub> (1.54 g, 11.1 mmol) and **82** (1.66 g, 3.73 mmol) in MeOH (20 mL) gave **80** in >99:1 dr. Purification *via* flash column chromatography (gradient elution, 3%→40% Et<sub>2</sub>O in 30-40 °C petrol) gave **80** as a white solid (971 mg, 85%, >99:1 dr); mp 75-76 °C;  $\nu_{\max}$  (KBr) 873, 746 (C–O);  $\delta_{\text{H}}$  (400 MHz, CDCl<sub>3</sub>) 0.71-0.81 (1H, m, C(4)*H*<sub>A</sub>), 1.29-1.32 (2H, m, C(5)*H*<sub>2</sub>), 1.56-1.66 (2H, m, C(6)*H*<sub>A</sub>, C(4)*H*<sub>B</sub>), 2.02-2.06 (1H, m, C(6)*H*<sub>B</sub>), 2.13-2.21 (1H, m, C(3)*H*), 2.33-2.49 (2H, m, C(3)*CH*<sub>2</sub>N), 3.04-3.06 (2H, m, C(1)*H*, C(2)*H*), 3.50-3.69 (4H, m, N(CH<sub>2</sub>Ph)<sub>2</sub>), 7.24-7.39 (10H, m, *Ph*);  $\delta_{\text{C}}$  (100 MHz, CDCl<sub>3</sub>) 17.2 (C(5)), 24.9 (C(4)), 25.8 (C(6)), 32.6 (C(3)), 52.7 (C(1)), 54.9 (C(2)), 57.0 (C(3)*CH*<sub>2</sub>N), 58.6 (N(CH<sub>2</sub>Ph)<sub>2</sub>), 126.8 (*p*-*Ph*), 128.2, 129.0 (*o*-, *m*-*Ph*), 139.6 (*i*-*Ph*);  $m/z$  (ESI<sup>+</sup>) 308 ([M+H]<sup>+</sup>, 100%); HRMS (ESI<sup>+</sup>) C<sub>21</sub>H<sub>26</sub>NO<sup>+</sup> ([M+H]<sup>+</sup>) requires 308.2009; found 308.2014.

**(1*RS*,2*RS*,3*RS*)-1-(*p*-Toluenesulfonyloxy)-2-hydroxy-3-(*N,N*-dibenzylamino)methyl-cyclohexane **78****

**and (1*RS*,2*RS*,3*SR*)-1-hydroxy-2-(*p*-toluenesulfonyloxy)-3-(*N,N*-dibenzylamino)methyl-cyclohexane **83****

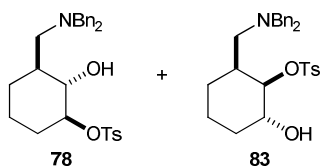

Anhydrous TsOH (123 mg, 0.71 mmol) was added to a stirred solution of **80** (73 mg, 0.24 mmol) in CH<sub>2</sub>Cl<sub>2</sub> (1 mL) at rt and the resultant solution was stirred for 2 h. The reaction was quenched with sat. aq. NaHCO<sub>3</sub> (1 mL) and the mixture was extracted with CH<sub>2</sub>Cl<sub>2</sub> (3 × 5 mL). The combined organic extracts were washed sequentially with sat. aq. NaHCO<sub>3</sub> (10 mL) and brine (10 mL), dried and concentrated *in vacuo* to give a 64:36 mixture of **78**:**83**. Purification *via* flash column chromatography (gradient elution, 3%→35% EtOAc in 30-40 °C petrol) gave **78** as a white solid (65 mg, 57%, >99:1 dr); mp 105-108 °C;  $\nu_{\max}$  (KBr) 3350 (O–H), 2934, 2860 (C–H), 1559, 1452, 1357, 1175, 939;  $\delta_{\text{H}}$  (400 MHz, CDCl<sub>3</sub>) 0.75-0.79 (1H, m, C(4)*H*<sub>A</sub>), 1.29-1.44 (3H, m, C(4)*H*<sub>B</sub>, C(5)*H*<sub>A</sub>, C(6)*H*<sub>A</sub>), 1.66-1.77 (2H, m, C(3)*H*, C(5)*H*<sub>B</sub>), 2.04-2.08 (1H, m, C(6)*H*<sub>B</sub>), 2.33 (1H, dd, *J* 12.7, 3.4, C(3)*CH*<sub>A</sub>*H*<sub>B</sub>N), 2.46 (3H, s, ArMe), 2.61 (1H, dd, C(3)*CH*<sub>A</sub>*H*<sub>B</sub>N), 3.21 (2H, d, *J* 12.7, N(CH<sub>A</sub>*H*<sub>B</sub>Ph)<sub>2</sub>), 3.22 (1H, t, *J* 9.3, C(2)*H*), 3.90 (2H, d, *J* 12.7, N(CH<sub>A</sub>*H*<sub>B</sub>Ph)<sub>2</sub>), 4.40-4.42 (1H, m,

C(1)*H*), 7.40-7.65 (12H, m, *Ar*, *Ph*), 6.31-6.55 (1H, br s, *OH*), 7.85-7.90 (2H, d, *J* 8.5, *Ar*);  $\delta_{\text{C}}$  (100 MHz,  $\text{CDCl}_3$ ) 21.7 (*ArMe*), 23.0 (*C*(5)), 27.8 (*C*(4)), 30.7 (*C*(6)), 39.1 (*C*(3)), 58.6 ( $\text{N}(\text{CH}_2\text{Ph})_2$ ), 59.7 (*C*(3) $\text{CH}_2\text{N}$ ), 77.8 (*C*(2)), 85.7 (*C*(1)), 127.4, 128.0, 128.5, 129.3, 129.4, 134.9, 137.3, 144.0 (*Ar*, *Ph*); *m/z* ( $\text{ESI}^+$ ) 480 ( $[\text{M}+\text{H}]^+$ , 100%); HRMS ( $\text{ESI}^+$ )  $\text{C}_{28}\text{H}_{33}\text{NNaO}_4\text{S}^+$  ( $[\text{M}+\text{Na}]^+$ ) requires 502.2023; found 502.2020. Further elution gave **83** as a white solid (31 mg, 27%, >99:1 dr); mp 116-118 °C;  $\nu_{\text{max}}$  (KBr) 3359 (O–H), 1568, 1494, 1356, 1188;  $\delta_{\text{H}}$  (400 MHz,  $\text{CDCl}_3$ ) 1.00-1.04 (1H, m, *C*(5)*H*<sub>A</sub>), 1.27-1.75 (5H, m, *C*(4)*H*<sub>2</sub>, *C*(5)*H*<sub>B</sub>, *C*(6)*H*<sub>2</sub>), 2.13-2.17 (1H, m, *C*(3)*CH*<sub>A</sub>*H*<sub>B</sub>*N*), 2.20-2.23 (1H, m, *C*(3)*H*), 2.31-2.36 (1H, m, *C*(3)*H*<sub>A</sub>*H*<sub>B</sub>*N*), 2.41 (3H, s, *ArMe*), 3.06 (2H, d, *J* 13.6,  $\text{N}(\text{CH}_A\text{H}_B\text{Ph})_2$ ), 3.68 (2H, d, *J* 13.6,  $\text{N}(\text{CH}_A\text{H}_B\text{Ph})_2$ ), 3.75-3.90 (1H, m, *C*(1)*H*), 4.45-4.55 (1H, m, *C*(2)*H*), 7.21-7.32 (12H, m, *Ar*, *Ph*), 7.75 (2H, d, *J* 8.4, *Ar*);  $\delta_{\text{C}}$  (100 MHz,  $\text{CDCl}_3$ ) 18.2 (*C*(5)), 21.6 (*ArMe*), 24.9 (*C*(4)), 30.0 (*C*(6)), 35.0 (*C*(3)), 52.7 (*C*(3) $\text{CH}_2\text{N}$ ), 58.7 ( $\text{N}(\text{CH}_2\text{Ph})_2$ ), 67.5 (*C*(1)), 85.1 (*C*(2)), 126.9, 127.7, 128.2, 128.9, 129.9, 134.0, 139.5, 144.8 (*Ar*, *Ph*); *m/z* ( $\text{ESI}^+$ ) 480 ( $[\text{M}+\text{H}]^+$ , 100%); HRMS ( $\text{ESI}^+$ )  $\text{C}_{28}\text{H}_{34}\text{NO}_4\text{S}^+$  ( $[\text{M}+\text{H}]^+$ ) requires 480.2203; found 480.2204.

**(1*RS*,2*RS*,3*RS*)-3-(*N,N*-Dibenzylamino)methyl-cyclohexane-1,2-diol **76****

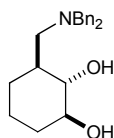

Anhydrous  $\text{Cl}_3\text{CCO}_2\text{H}$  (283 mg, 1.73 mmol) was added to a stirred solution of **80** (106 mg, 0.34 mmol) in  $\text{CH}_2\text{Cl}_2$  (1 mL) at rt and stirred for 14 h. The reaction was quenched with sat. aq.  $\text{NaHCO}_3$  (1 mL) and the mixture was extracted with  $\text{CH}_2\text{Cl}_2$  (3  $\times$  5 mL). The combined organic extracts were washed sequentially with sat. aq.  $\text{NaHCO}_3$  (10 mL) and brine (10 mL), dried and concentrated *in vacuo* to give a crude reaction mixture. Following the *General Procedure*, transesterification with  $\text{K}_2\text{CO}_3$  (239 mg, 1.73 mmol) in MeOH (4 mL) gave a 56:44 mixture of **76**:**75**. Purification *via* flash column chromatography (gradient elution, 7%→60% EtOAc in 30-40 °C petrol) gave **76** as a colourless oil (59 mg, 52%, >99:1 dr);  $\nu_{\text{max}}$  (film) 3406 (O–H);  $\delta_{\text{H}}$  (400 MHz,  $\text{CDCl}_3$ ) 1.02-1.20 (2H, m, *C*(5)*H*<sub>2</sub>), 1.32-1.53 (2H, m, *C*(4)*H*<sub>2</sub>), 1.67-1.83 (2H, m, *C*(6)*H*<sub>2</sub>), 1.90-1.94 (1H, m, *C*(3)*H*), 2.19-2.37 (2H, m, *C*(3) $\text{CH}_2\text{N}$ ), 2.85-2.90 (1H, br s, *OH*), 2.95-3.01 (1H, m, *C*(1)*H*), 3.06-3.16 (2H, m,  $\text{N}(\text{CH}_A\text{H}_B\text{Ph})_2$ ), 3.45-3.52 (1H, m, *C*(2)*H*), 4.05-4.09 (2H, m,  $\text{N}(\text{CH}_A\text{H}_B\text{Ph})_2$ ), 6.95-7.96 (1H, br s, *OH*), 7.27-7.39 (10H, m, *Ph*);  $\delta_{\text{C}}$  (100 MHz,  $\text{CDCl}_3$ ) 23.1 (*C*(4)), 28.5 (*C*(6)), 31.1 (*C*(5)), 37.9 (*C*(3)), 54.7 (*C*(3) $\text{CH}_2\text{N}$ ), 59.0 ( $\text{N}(\text{CH}_2\text{Ph})_2$ ), 74.8 (*C*(1)), 81.8 (*C*(2)), 127.5 (*p-Ph*), 128.6, 129.2 (*o-*, *m-Ph*), 137.4 (*i-Ph*); *m/z* ( $\text{ESI}^+$ ) 326 ( $[\text{M}+\text{H}]^+$ , 100%); HRMS ( $\text{ESI}^+$ )  $\text{C}_{21}\text{H}_{27}\text{NNaO}_2^+$  ( $[\text{M}+\text{Na}]^+$ ) requires 348.1934; found 348.1936. Further elution gave **75** as a colourless oil (43 mg, 38%, >99:1 dr).

**(1*RS*,2*RS*,3*RS*)-1-Acetoxy-2-hydroxy-3-(*N,N*-dibenzylamino)methyl-cyclohexane **84****

**and (1*RS*,2*RS*,3*SR*)-1-hydroxy-2-acetoxy-3-(*N,N*-dibenzylamino)methyl-cyclohexane **85****

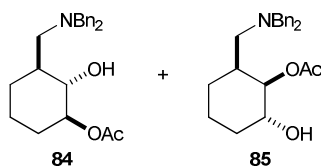

A solution of **80** (350 mg, 1.14 mmol) in AcOH (3 mL) was stirred at rt for 13 h. The reaction was quenched with sat. aq. NaHCO<sub>3</sub> (20 mL) and the mixture was extracted with CH<sub>2</sub>Cl<sub>2</sub> (3 × 10 mL). The combined organic extracts were washed sequentially with sat. aq. NaHCO<sub>3</sub> (30 mL) and brine (30 mL), dried and concentrated *in vacuo* to give an 18:24:58 mixture of **80**:**84**:**85**. Purification *via* exhaustive flash column chromatography (gradient elution, 5%→40% EtOAc in 30-40 °C petrol) gave **84** as a colourless oil (8.5 mg, 2%, >99:1 dr);  $\nu_{\max}$  (film) 3374 (O–H), 3028, 2935, 2860 (C–H), 1713 (C=O), 1452, 1248;  $\delta_{\text{H}}$  (400 MHz, CDCl<sub>3</sub>) 0.80-0.92 (1H, m, C(4)*H*<sub>A</sub>), 1.13-1.20 (1H, m, C(6)*H*<sub>A</sub>), 1.38-1.40 (1H, m, C(5)*H*<sub>A</sub>), 1.45-1.49 (1H, m, C(4)*H*<sub>B</sub>), 1.62-1.70 (1H, m, C(5)*H*<sub>B</sub>), 1.86-1.88 (1H, m, C(3)*H*), 2.00-2.05 (1H, m, C(6)*H*<sub>B</sub>), 2.12 (3H, s, COMe), 2.37 (1H, dd, *J* 11.4, 9.0, C(3)CH<sub>A</sub>H<sub>B</sub>N), 2.68 (1H, dd, *J* 11.4, 11.3, C(3)CH<sub>A</sub>H<sub>B</sub>N), 3.16 (2H, d, *J* 13.4, N(CH<sub>A</sub>H<sub>B</sub>Ph)<sub>2</sub>), 3.29 (1H, app t, *J* 9.0, C(2)*H*), 4.01 (2H, d, *J* 13.4, N(CH<sub>A</sub>H<sub>B</sub>Ph)<sub>2</sub>), 4.65-4.74 (1H, m, C(1)*H*), 6.88-6.95 (1H, br s, OH), 7.25-7.40 (10H, m, *Ph*);  $\delta_{\text{C}}$  (100 MHz, CDCl<sub>3</sub>) 21.6 (COMe), 23.0, 28.2, 29.5 (C(4), C(5), C(6)), 38.7 (C(3)), 58.8 (N(CH<sub>2</sub>Ph)<sub>2</sub>), 60.4 (C(3)CH<sub>2</sub>N), 77.1 (C(1)), 78.4 (C(2)), 127.5 (*p-Ph*), 128.5, 129.0 (*o-*, *m-Ph*), 137.2 (*i-Ph*); 171.1 (COMe); *m/z* (ESI<sup>+</sup>) 368 ([M+H]<sup>+</sup>, 100%); HRMS (ESI<sup>+</sup>) C<sub>23</sub>H<sub>29</sub>NNaO<sub>3</sub><sup>+</sup> ([M+Na]<sup>+</sup>) requires 390.2040; found 390.2038. Further elution gave **85** as a white solid (42 mg, 10%, >99:1 dr); mp 110-113 °C;  $\nu_{\max}$  (KBr) 3484 (O–H), 2935 (C–H), 1717 (C=O), 1452, 1243;  $\delta_{\text{H}}$  (400 MHz, CDCl<sub>3</sub>) 1.25-1.67 (6H, m, C(4)*H*<sub>2</sub>, C(5)*H*<sub>2</sub>, C(6)*H*<sub>2</sub>), 1.78 (3H, s, COMe), 2.02 (1H, br s, OH), 2.18 (1H, dd, *J* 12.2, 6.8, C(3)CH<sub>A</sub>H<sub>B</sub>N), 2.28-2.39 (1H, m, C(3)*H*), 2.46 (1H, dd, *J* 12.2, 7.8, C(3)CH<sub>A</sub>H<sub>B</sub>N), 3.41 (2H, d, *J* 13.4, N(CH<sub>A</sub>H<sub>B</sub>Ph)<sub>2</sub>), 3.60 (2H, d, *J* 13.4, N(CH<sub>A</sub>H<sub>B</sub>Ph)<sub>2</sub>), 3.85 (1H, app br s, C(1)*H*), 4.88-4.97 (1H, m, C(2)*H*), 7.22-7.42 (10H, m, *Ph*);  $\delta_{\text{C}}$  (100 MHz, CDCl<sub>3</sub>) 19.0 (CH<sub>2</sub>), 21.1 (COMe), 25.2, 29.0 (CH<sub>2</sub>), 32.9 (C(3)), 54.0 (C(3)CH<sub>2</sub>N), 59.1 (N(CH<sub>2</sub>Ph)<sub>2</sub>), 66.6 (C(1)), 74.0 (C(2)), 126.8 (*p-Ph*), 128.2, 129.0 (*o-*, *m-Ph*), 139.7 (*i-Ph*), 170.7 (COMe); *m/z* (ESI<sup>+</sup>) 368 ([M+H]<sup>+</sup>, 100%); HRMS (ESI<sup>+</sup>) C<sub>23</sub>H<sub>30</sub>NO<sub>3</sub><sup>+</sup> ([M+H]<sup>+</sup>) requires 368.2220; found 368.2225. A mixed fraction containing both **84** and **85** was also obtained (284 mg, 68%).

## X-ray Crystal Structure Determination for **85**

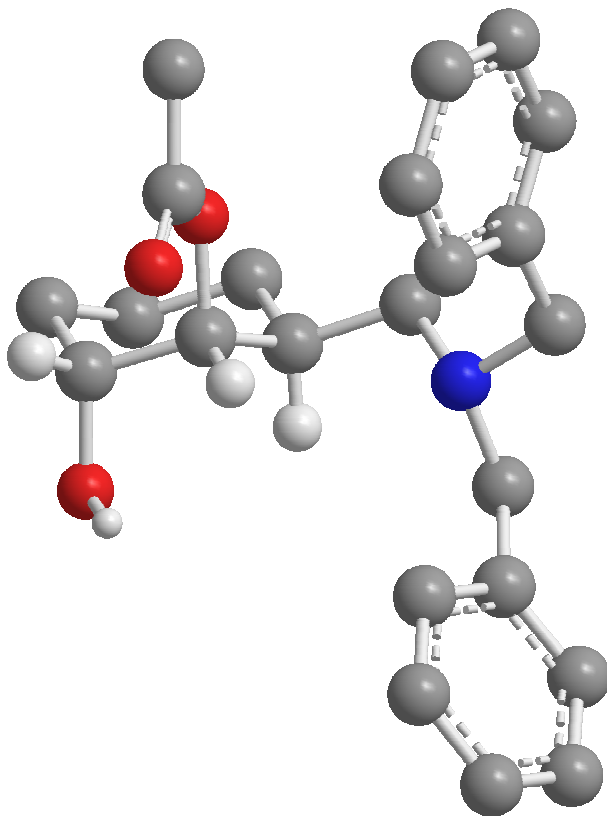

Data were collected using an Enraf-Nonius  $\kappa$ -CCD diffractometer with graphite monochromated Mo- $K\alpha$  radiation using standard procedures at 150 K. The structure was solved by direct methods (SIR92); all non-hydrogen atoms were refined with anisotropic thermal parameters. Hydrogen atoms were added at idealised positions. The structure was refined using CRYSTALS.<sup>36</sup>

X-ray crystal structure data for **85** [C<sub>23</sub>H<sub>29</sub>NO<sub>3</sub>]:  $M = 367.49$ , monoclinic, space group  $P 2_1/a$ ,  $a = 8.7731(2)$  Å,  $b = 22.3043(6)$  Å,  $c = 10.5826(3)$  Å,  $\beta = 98.2573(11)^\circ$ ,  $V = 2049.31(9)$  Å<sup>3</sup>,  $Z = 4$ ,  $\mu = 0.078$  mm<sup>-1</sup>, colourless plate, crystal dimensions =  $0.05 \times 0.2 \times 0.2$  mm<sup>3</sup>. A total of 4631 unique reflections were measured for  $5 < \theta < 27$  and 2475 reflections were used in the refinement. The final parameters were  $wR_2 = 0.048$  and  $R_1 = 0.045$  [ $I > 2.5\sigma(I)$ ]. Crystallographic data (excluding structure factors) has been deposited with the Cambridge Crystallographic Data Centre as supplementary publication number CCDC 733903. Copies of the data can be obtained, free of charge, on application to CCDC, 12 Union Road, Cambridge, CB2 1EZ, UK [fax: +44(0)-1223-336033 or e-mail: deposit@ccdc.cam.ac.uk].

<sup>36</sup> Betteridge, P. W.; Carruthers, J. R.; Cooper, R. I.; Prout, C. K.; Watkin, D. J. CRYSTALS, 2001, Issue 11, Chemical Crystallography Laboratory, University of Oxford, UK.

**(1*RS*,2*SR*,3*SR*)-3-(*N,N*-Dibenzylamino)methyl-cyclohexane-1,2-diol **88****

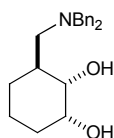

*From 82*: KOAc (122 mg, 1.24 mmol) was added to a stirred solution of **82** (370 mg, 0.83 mmol) in EtOH/H<sub>2</sub>O (v:v 6:1, 7 mL) and the resultant mixture was heated at 80 °C for 12 h. The reaction mixture was allowed to cool to rt then concentrated *in vacuo*. The residue was dissolved in CH<sub>2</sub>Cl<sub>2</sub> (10 mL) and the resultant solution was washed sequentially with sat. aq. NaHCO<sub>3</sub> (3 × 10 mL) and brine (10 mL), then dried and concentrated *in vacuo* to give a 75:25 mixture of **86:87**. Following the *General Procedure*, transesterification with K<sub>2</sub>CO<sub>3</sub> (574 mg, 4.15 mmol) in MeOH (3 mL) gave **88** in >99:1 dr. Purification *via* flash column chromatography (gradient elution, 7%→60% EtOAc in 30-40 °C petrol) gave **88** as a white solid (221 mg, 82%, >99:1 dr); mp 137-139 °C;  $\nu_{\max}$  (KBr) 3396 (O–H);  $\delta_{\text{H}}$  (400 MHz, CDCl<sub>3</sub>) 0.68-0.82 (1H, m, C(4)*H*<sub>A</sub>), 1.21-1.34 (1H, m, C(6)*H*<sub>A</sub>), 1.36-1.50 (2H, m, C(4)*H*<sub>B</sub>, C(5)*H*<sub>A</sub>), 1.60-1.73 (1H, m, C(5)*H*<sub>B</sub>), 1.88-1.98 (1H, m, C(6)*H*<sub>B</sub>), 2.08-2.20 (1H, m, C(3)*H*), 2.29-2.39 (1H, dd, *J* 12.5, 2.8 C(3)*CH*<sub>A</sub>*H*<sub>B</sub>N), 2.62 (1H, app t, *J* 6.3, C(3)*CH*<sub>A</sub>*H*<sub>B</sub>N), 3.09-3.20 (3H, m, C(2)*H*, N(*CH*<sub>A</sub>*H*<sub>B</sub>Ph)<sub>2</sub>), 3.86-3.91 (1H, m, C(1)*H*), 4.07 (2H, d, *J* 13.0, N(*CH*<sub>A</sub>*H*<sub>B</sub>Ph)<sub>2</sub>), 7.26-7.43 (10H, m, *Ph*);  $\delta_{\text{C}}$  (100 MHz, CDCl<sub>3</sub>) 19.1 (C(5)), 28.1 (C(4)), 29.3 (C(6)), 33.3 (C(3)), 59.0 (N(*CH*<sub>2</sub>Ph)<sub>2</sub>), 60.4 (C(3)*CH*<sub>2</sub>N), 68.4 (C(1)), 78.7 (C(2)), 127.5 (*p-Ph*), 128.6, 129.3 (*o-*, *m-Ph*), 137.4 (*i-Ph*); *m/z* (ESI<sup>+</sup>) 326 ([*M*+*H*]<sup>+</sup>, 100%); HRMS (ESI<sup>+</sup>) C<sub>21</sub>H<sub>28</sub>NO<sub>2</sub><sup>+</sup> ([*M*+*H*]<sup>+</sup>) requires 326.2115; found 326.2117.

*Dihydroxylation of 65*: A solution of OsO<sub>4</sub> (92 mg, 0.36 mmol) in CH<sub>2</sub>Cl<sub>2</sub> (1 mL) was added *via* syringe to a stirred solution of **65** (100 mg, 0.34 mmol) and TMEDA (0.1 mL, 0.38 mmol) in CH<sub>2</sub>Cl<sub>2</sub> (3 mL) at –78 °C. After 2 h the mixture was allowed to warm to rt and then concentrated *in vacuo*. The residue was dissolved in MeOH (10 mL) and conc. HCl (5 drops) was added. After stirring at rt for 24 h, sat. aq. NaHCO<sub>3</sub> (20 mL) was added and the mixture was extracted with CH<sub>2</sub>Cl<sub>2</sub> (3 × 25 mL). The combined organic extracts were washed with brine (50 mL), dried and concentrated *in vacuo*. Purification *via* flash column chromatography (eluent 30-40 °C petrol/EtOAc, 85:15) gave **88** as a white solid (93 mg, 83%, >99:1 dr).

## X-ray Crystal Structure Determination for **88**

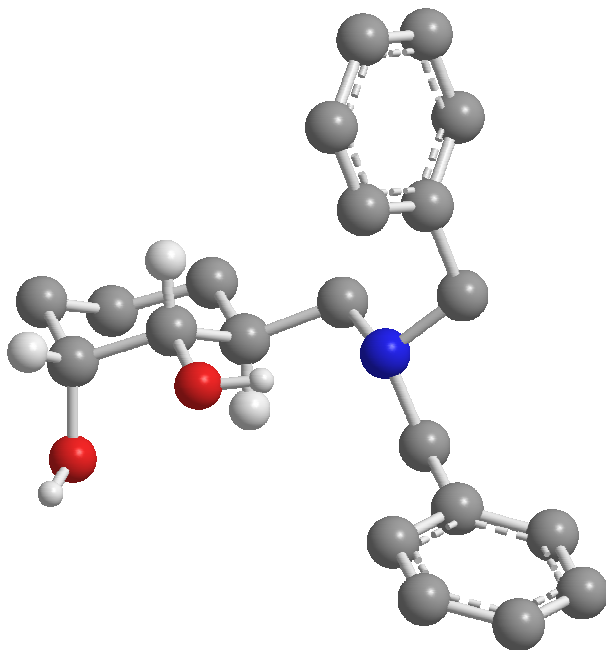

Data were collected using an Enraf-Nonius  $\kappa$ -CCD diffractometer with graphite monochromated Mo- $K\alpha$  radiation using standard procedures at 190 K. The structure was solved by direct methods (SIR92); all non-hydrogen atoms were refined with anisotropic thermal parameters. Hydrogen atoms were added at idealised positions. The structure was refined using CRYSTALS.<sup>37</sup>

X-ray crystal structure data for **88** [C<sub>21</sub>H<sub>27</sub>NO<sub>2</sub>]:  $M = 650.90$ , triclinic, space group  $P\bar{1}$ ,  $a = 9.80800(10)$  Å,  $b = 12.7341(2)$  Å,  $c = 15.9205(3)$  Å,  $\alpha = 100.7822(6)^\circ$ ,  $\beta = 93.3074(7)^\circ$ ,  $\gamma = 109.7640(10)^\circ$ ,  $V = 1822.44(5)$  Å<sup>3</sup>,  $Z = 4$ ,  $\mu = 0.075$  mm<sup>-1</sup>, colourless block, crystal dimensions =  $0.2 \times 0.2 \times 0.2$  mm<sup>3</sup>. A total of 8196 unique reflections were measured for  $5 < \theta < 27$  and 8195 reflections were used in the refinement. The final parameters were  $wR_2 = 0.114$  and  $R_1 = 0.079$  [ $I > 10.0\sigma(I)$ ]. Crystallographic data (excluding structure factors) has been deposited with the Cambridge Crystallographic Data Centre as supplementary publication number CCDC 733904. Copies of the data can be obtained, free of charge, on application to CCDC, 12 Union Road, Cambridge, CB2 1EZ, UK [fax: +44(0)-1223-336033 or e-mail: deposit@ccdc.cam.ac.uk].

## (1*RS*,2*RS*,3*SR*)-1-(*p*-Toluenesulfonyloxy)-2-acetoxy-3-(*N,N*-dibenzylamino)methyl-cyclohexane **89**

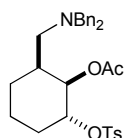

Ac<sub>2</sub>O (34  $\mu$ L, 0.3 mmol) was added to solution of **77** (114 mg, 0.24 mmol), pyridine (97  $\mu$ L, 1.26 mmol) and DMAP (6 mg) in CH<sub>2</sub>Cl<sub>2</sub> (2 mL), and the resultant mixture stirred at rt for 2 h. The reaction mixture was

<sup>37</sup> Betteridge, P. W.; Carruthers, J. R.; Cooper, R. I.; Prout, C. K.; Watkin, D. J. CRYSTALS, 2001, Issue 11, Chemical Crystallography Laboratory, University of Oxford, UK.

then diluted with CH<sub>2</sub>Cl<sub>2</sub> (5 mL) and washed sequentially with sat. aq. NaHCO<sub>3</sub> (3 × 5 mL) and sat. aq. CuSO<sub>4</sub> (3 × 5 mL). The organic layer was dried and concentrated *in vacuo*. Purification *via* flash column chromatography (gradient elution, 3%→30% EtOAc in 30-40 °C petrol) gave **89** as a colourless oil (74 mg, 60%, >99:1 dr);  $\nu_{\max}$  (film) 1732 (C=O);  $\delta_{\text{H}}$  (400 MHz, CDCl<sub>3</sub>) 1.19-1.30 (1H, m, C(4)*H*<sub>A</sub>), 1.40-1.51 (2H, m, C(4)*H*<sub>B</sub>, C(5)*H*<sub>A</sub>), 1.53-1.69 (2H, m, C(5)*H*<sub>B</sub>, C(6)*H*<sub>A</sub>) overlapping 1.64 (3H, s, COMe), 1.72-1.86 (1H, m, C(6)*H*<sub>B</sub>), 2.07 (1H, dd, *J* 12.2, 6.1, C(3)CH<sub>A</sub>H<sub>B</sub>N), 2.16-2.26 (1H, m, C(3)*H*), 2.40 (1H, dd, *J* 12.2, 8.8, C(3)CH<sub>A</sub>H<sub>B</sub>N), 2.45 (3H, s, ArMe), 3.23 (2H, d, *J* 13.4, N(CH<sub>A</sub>H<sub>B</sub>Ph)<sub>2</sub>), 3.62 (2H, d, *J* 13.4, N(CH<sub>A</sub>H<sub>B</sub>Ph)<sub>2</sub>), 4.65-4.70 (1H, m, C(1)*H*), 4.86-4.91 (1H, m, C(2)*H*), 7.20-7.34 (12H, m, Ar, Ph), 7.80 (2H, d, *J* 8.3, Ar);  $\delta_{\text{C}}$  (100 MHz, CDCl<sub>3</sub>) 19.0 (C(5)), 20.7 (COMe), 21.8 (ArMe), 24.2, 26.8 (C(4), C(6)), 32.8 (C(3)), 54.1 (C(3)CH<sub>2</sub>N), 58.8 (N(CH<sub>2</sub>Ph)<sub>2</sub>), 69.4 (C(2)), 76.2 (C(1)), 126.8, 127.7, 128.2, 128.9, 129.8, 133.9, 139.4, 144.6, (Ar, Ph), 169.7 (COMe); *m/z* (ESI<sup>+</sup>) 522 ([M+H]<sup>+</sup>, 100%); HRMS (ESI<sup>+</sup>) C<sub>30</sub>H<sub>36</sub>NO<sub>5</sub>S<sup>+</sup> ([M+H]<sup>+</sup>) requires 522.2309; found 522.2315.

**(1*RS*,2*SR*,3*RS*)-3-(*N,N*-Dibenzylamino)methyl-cyclohexane-1,2-diol **92****

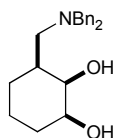

KOAc (218 mg, 2.22 mmol) was added to a stirred solution of **89** (772 mg, 1.48 mmol) in EtOH/H<sub>2</sub>O (v:v 6:1, 10 mL) and the resultant mixture was heated at 80 °C for 12 h. The reaction mixture was allowed to cool to rt then concentrated *in vacuo*. The residue was dissolved in CH<sub>2</sub>Cl<sub>2</sub> (10 mL) and the resultant solution was washed sequentially with sat. aq. NaHCO<sub>3</sub> (3 × 10 mL) and brine (10 mL), then dried and concentrated *in vacuo* to give a 55:45 mixture of **90:91**. Following the *General Procedure*, transesterification with K<sub>2</sub>CO<sub>3</sub> (2.05 g, 14.8 mmol) in MeOH (5 mL) gave **92** in >99:1 dr. Purification *via* flash column chromatography (gradient elution, 5%→60% EtOAc in 30-40 °C petrol) gave **92** as a colourless oil (135 mg, 28%, >99:1 dr);  $\nu_{\max}$  (film) 3378 (O–H);  $\delta_{\text{H}}$  (400 MHz, CDCl<sub>3</sub>) 1.14-1.35 (3H, m, C(4)*H*<sub>2</sub>, C(5)*H*<sub>A</sub>), 1.50-1.74 (4H, m, C(3)*H*, C(5)*H*<sub>B</sub>, C(6)*H*<sub>2</sub>), 2.32 (1H, dd, *J* 12.5, 4.8, C(3)CH<sub>A</sub>H<sub>B</sub>N), 2.50 (2H, br s, OH), 2.72 (1H, dd, *J* 12.5, 10.4, C(3)CH<sub>A</sub>H<sub>B</sub>N), 3.34 (2H, d, *J* 13.1, N(CH<sub>A</sub>H<sub>B</sub>Ph)<sub>2</sub>), 3.51 (1H, app dt, *J* 10.1, 3.5, C(1)*H*), 3.79 (2H, d, *J* 13.1, N(CH<sub>A</sub>H<sub>B</sub>Ph)<sub>2</sub>), 4.04 (1H, app br s, C(2)*H*), 7.20-7.41 (10H, m, Ph);  $\delta_{\text{C}}$  (100 MHz, CDCl<sub>3</sub>) 22.4 (C(5)), 24.4 (C(4)), 29.4 (C(6)), 38.2 (C(3)), 55.7 (C(3)CH<sub>2</sub>N), 59.2 (N(CH<sub>2</sub>Ph)<sub>2</sub>), 70.8 (C(2)), 71.8 (C(1)), 127.3 (*p*-Ph), 128.5, 129.1 (*o*-, *m*-Ph), 139.5 (*i*-Ph); *m/z* (ESI<sup>+</sup>) 326 ([M+H]<sup>+</sup>, 100%); HRMS (ESI<sup>+</sup>) C<sub>21</sub>H<sub>28</sub>NO<sub>2</sub><sup>+</sup> ([M+H]<sup>+</sup>) requires 326.2115; found 326.2120.

**(1*RS*,2*RS*,3*SR*)-3-Aminomethyl-cyclohexane-1,2-diol **93****

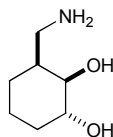

*From 71*: Pd(OH)<sub>2</sub>/C (75 mg, 50% w/w) was added to a vigorously stirred solution of **71** (150 mg, 0.64 mmol, 95:5 dr) in degassed MeOH (2 mL) and the resultant suspension was stirred at rt under H<sub>2</sub> (1 atm) for 6 h. The suspension was filtered through a pad of Celite<sup>®</sup> (eluent MeOH) and the filtrate was concentrated *in vacuo* to give **93** as a colourless oil (89 mg, 96%, 95:5 dr).

*From 75*: Pd(OH)<sub>2</sub>/C (40 mg, 50% w/w) was added to a vigorously stirred solution of **75** (80 mg, 0.24 mmol) in degassed MeOH (3 mL) and the resultant suspension was stirred at rt under H<sub>2</sub> (1 atm) for 6 h. The suspension was filtered through a pad of Celite<sup>®</sup> (eluent MeOH) and the filtrate was concentrated *in vacuo* to give **93** as a colourless oil (35 mg, 99%, >99:1 dr);  $\nu_{\max}$  (film) 3355 (O–H), 2932 (C–H);  $\delta_{\text{H}}$  (400 MHz, *d*<sub>4</sub>-MeOH) 1.45-1.55 (4H, m, C(4)*H*<sub>A</sub>, C(5)*H*<sub>2</sub>, C(6)*H*<sub>A</sub>), 1.61-1.65 (1H, m, C(4)*H*<sub>B</sub>), 1.80-1.95 (2H, m, C(3)*H*, C(6)*H*<sub>B</sub>), 2.63 (1H, dd, *J* 12.6, 6.6, C(3)*CH*<sub>A</sub>*H*<sub>B</sub>N), 2.83 (1H, dd, *J* 12.6, 6.8, C(3)*CH*<sub>A</sub>*H*<sub>B</sub>N), 3.65-3.69 (1H, m, C(2)*H*), 3.69-3.74 (1H, m, C(1)*H*);  $\delta_{\text{C}}$  (100 MHz, *d*<sub>4</sub>-MeOH) 19.5, 24.5, 28.7 (C(4), C(5), C(6)), 39.0 (C(3)), 42.9 (C(3)*CH*<sub>2</sub>N), 69.5 (C(1)), 72.2 (C(2)); *m/z* (ESI<sup>+</sup>) 146 ([M+H]<sup>+</sup>, 100%); HRMS (ESI<sup>+</sup>) C<sub>7</sub>H<sub>16</sub>NO<sub>2</sub><sup>+</sup> ([M+H]<sup>+</sup>) requires 146.1176; found 146.1174.

**(1*RS*,2*RS*,3*RS*)-3-Aminomethyl-cyclohexane-1,2-diol **94****

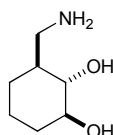

Pd(OH)<sub>2</sub>/C (24 mg, 50% w/w) was added to a vigorously stirred solution of **76** (48 mg, 0.15 mmol) in degassed MeOH (3 mL) and the resultant suspension was stirred at rt under H<sub>2</sub> (1 atm) for 6 h. The suspension was filtered through a pad of Celite<sup>®</sup> (eluent MeOH) and the filtrate was concentrated *in vacuo* to give **94** as a colourless oil (21 mg, 99%, >99:1 dr);  $\nu_{\max}$  (film) 3345 (O–H), 2961, 2930 (C–H);  $\delta_{\text{H}}$  (400 MHz, *d*<sub>4</sub>-MeOH) 0.98-1.23 (1H, m, C(4)*H*<sub>A</sub>), 1.25-1.47 (3H, m, C(3)*H*, C(4)*H*<sub>B</sub>, C(6)*H*<sub>A</sub>), 1.73-1.76 (2H, m, C(5)*H*<sub>2</sub>), 1.92-1.95 (1H, m, C(6)*H*<sub>B</sub>), 2.68 (1H, dd, *J* 12.6, 5.8, C(3)*CH*<sub>A</sub>*H*<sub>B</sub>N), 2.94 (1H, dd, *J* 12.6, 5.8, C(3)*CH*<sub>A</sub>*H*<sub>B</sub>N), 3.08 (1H, app t, *J* 9.4, C(2)*H*), 3.31-3.37 (1H, m, C(1)*H*);  $\delta_{\text{C}}$  (100 MHz, *d*<sub>4</sub>-MeOH) 23.3, 28.6, 33.1 (C(4), C(5), C(6)), 43.3 (C(3)), 45.1 (C(3)*CH*<sub>2</sub>N), 75.0 (C(1)), 78.9 (C(2)); *m/z* (ESI<sup>+</sup>) 146 ([M+H]<sup>+</sup>, 100%); HRMS (ESI<sup>+</sup>) C<sub>7</sub>H<sub>16</sub>NO<sub>2</sub><sup>+</sup> ([M+H]<sup>+</sup>) requires 146.1176; found 146.1177.



**(1*RS*,2*SR*,3*SR*)-3-Aminomethyl-cyclohexane-1,2-diol **95****

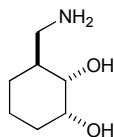

Pd(OH)<sub>2</sub>/C (36 mg, 50% w/w) was added to a vigorously stirred solution of **88** (72 mg, 0.23 mmol) in degassed MeOH (3 mL) and the resultant suspension was stirred at rt under H<sub>2</sub> (1 atm) for 6 h. The suspension was filtered through a pad of Celite<sup>®</sup> (eluent MeOH) and the filtrate was concentrated *in vacuo* to give **95** as a colourless oil (32 mg, 99%, >99:1 dr);  $\nu_{\max}$  (film) 3357 (O–H), 2931 (C–H), 1574, 1456, 1326, 1067;  $\delta_{\text{H}}$  (400 MHz, *d*<sub>4</sub>-MeOH) 0.94–1.07 (1H, m, C(4)*H*<sub>A</sub>), 1.39–1.51 (2H, m, C(5)*H*<sub>A</sub>, C(6)*H*<sub>A</sub>), 1.59–1.77 (2H, m, C(4)*H*<sub>B</sub>, C(5)*H*<sub>B</sub>), 1.77–1.88 (2H, m, C(3)*H*, C(6)*H*<sub>B</sub>), 2.63–2.74 (1H, m, C(3)*CH*<sub>A</sub>*H*<sub>B</sub>N), 2.89–2.92 (1H, m, C(3)*CH*<sub>A</sub>*H*<sub>B</sub>N), 3.30–3.37 (1H, m, C(2)*H*), 3.86–3.91 (1H, m, C(1)*H*);  $\delta_{\text{C}}$  (100 MHz, *d*<sub>4</sub>-MeOH) 19.1 (C(5)), 28.3 (C(4)), 33.1 (C(6)), 39.1 (C(3)), 45.3 (C(3)*CH*<sub>2</sub>N), 69.8 (C(1)), 76.6 (C(2)); HRMS (ESI<sup>+</sup>) C<sub>7</sub>H<sub>16</sub>NO<sub>2</sub><sup>+</sup> ([M+H]<sup>+</sup>) requires 146.1176; found 146.1172.

**(1*RS*,2*SR*,3*RS*)-3-Aminomethyl-cyclohexane-1,2-diol **96****

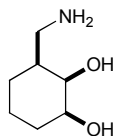

Pd(OH)<sub>2</sub>/C (44 mg, 50% w/w) was added to a vigorously stirred solution of **92** (88 mg, 0.28 mmol) in degassed MeOH (3 mL) and the resultant suspension was stirred at rt under H<sub>2</sub> (1 atm) for 6 h. The suspension was filtered through a pad of Celite<sup>®</sup> (eluent MeOH) and the filtrate was concentrated *in vacuo* to give **96** as a colourless oil (39 mg, 98%, >99:1 dr);  $\nu_{\max}$  (film) 3357 (O–H), 2933 (C–H), 1593, 1448;  $\delta_{\text{H}}$  (400 MHz, *d*<sub>4</sub>-MeOH) 1.22–1.42 (3H, m, C(4)*H*<sub>2</sub>, C(5)*H*<sub>A</sub>), 1.43–1.53 (1H, m, C(3)*H*), 1.57–1.67 (2H, m, C(6)*H*<sub>2</sub>), 1.78–1.80 (1H, m, C(5)*H*<sub>B</sub>), 2.64 (1H, dd, *J* 7.6, 12.6, C(3)*CH*<sub>A</sub>*H*<sub>B</sub>N), 2.78 (1H, dd, *J* 5.8, 12.6, C(3)*CH*<sub>A</sub>*H*<sub>B</sub>N), 3.44–3.53 (1H, m, C(1)*H*), 3.88–3.93 (1H, m, C(2)*H*);  $\delta_{\text{C}}$  (100 MHz, *d*<sub>4</sub>-MeOH) 23.1 (C(4)), 23.5 (C(5)), 28.1 (C(6)), 43.0 (C(3)), 43.7 (C(3)*CH*<sub>2</sub>N), 69.5 (C(2)), 72.5 (C(1)); HRMS (ESI<sup>+</sup>) C<sub>7</sub>H<sub>16</sub>NO<sub>2</sub><sup>+</sup> ([M+H]<sup>+</sup>) requires 146.1176; found 146.1175.

## 2. Copies of $^1\text{H}$ and $^{13}\text{C}$ Spectra

### Cycloheptene 9 (400 MHz $^1\text{H}$ , $\text{CDCl}_3$ )

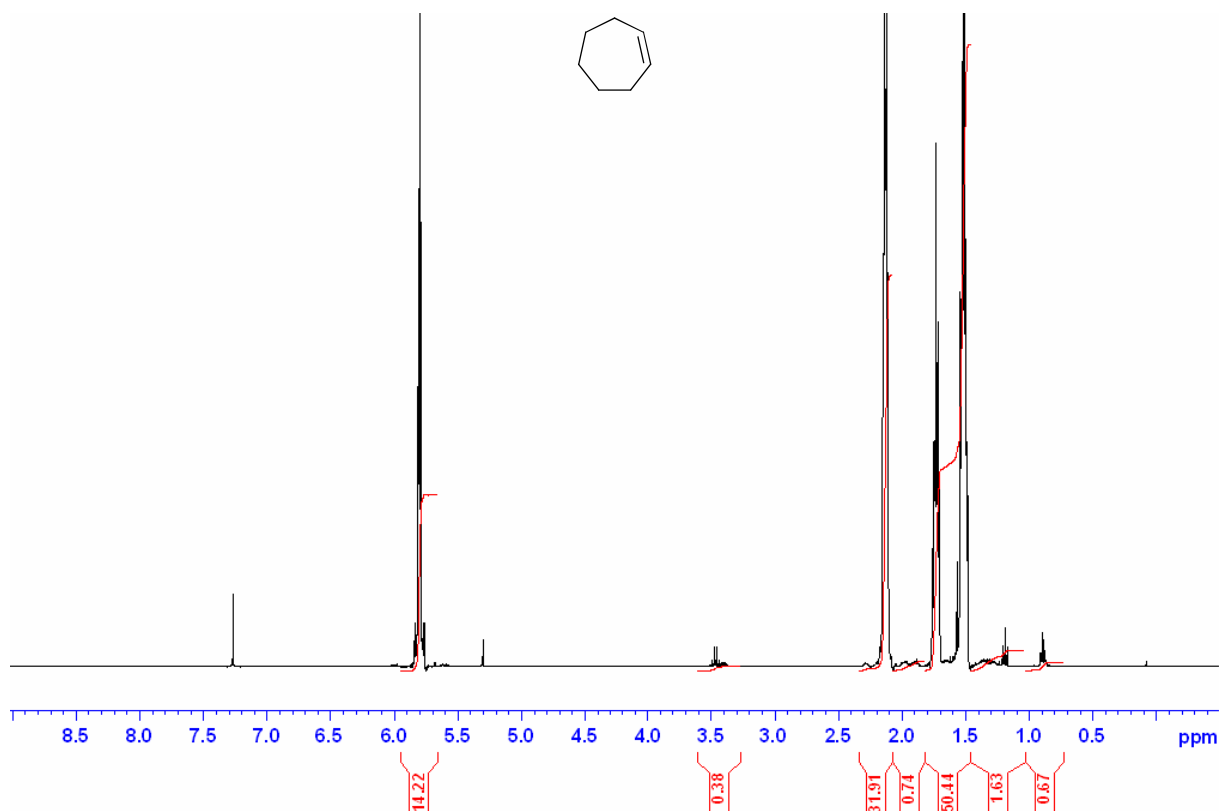

### (*RS*)-3-Bromocyclohept-1-ene 12 (400 MHz $^1\text{H}$ , $\text{CDCl}_3$ )

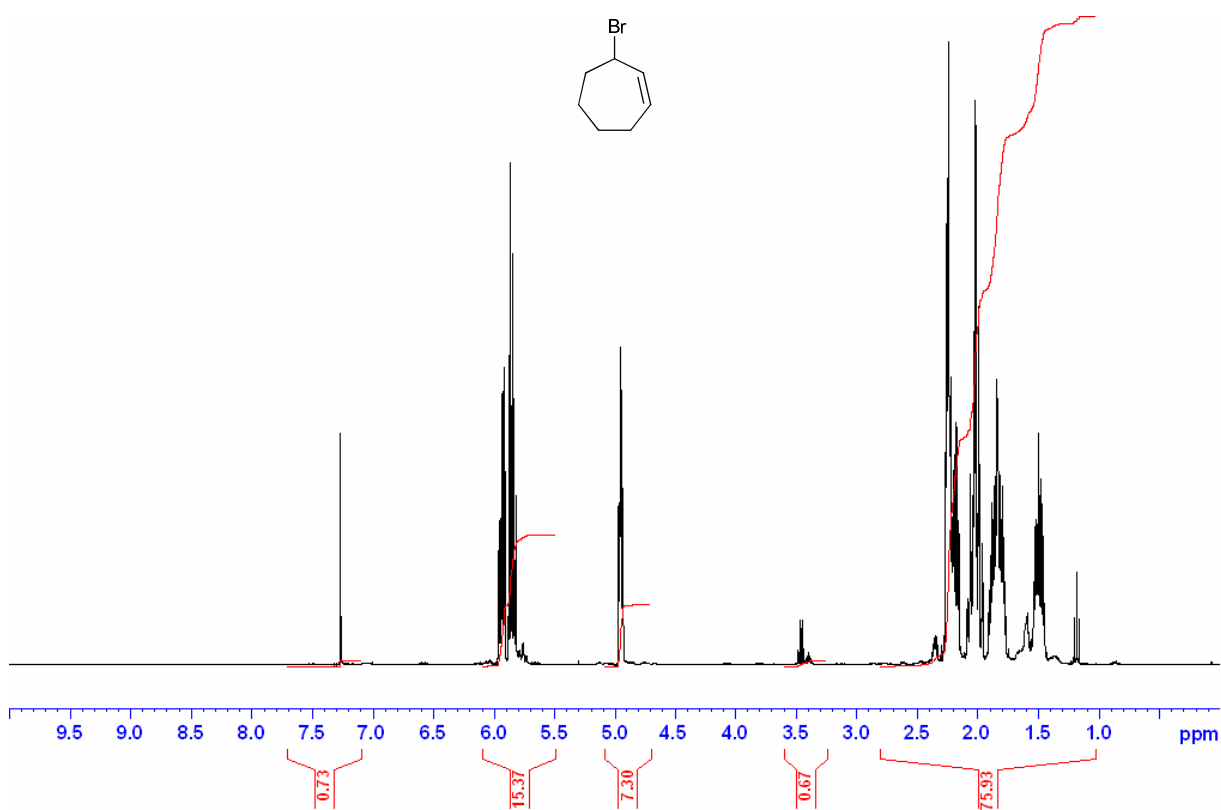

**(*RS,Z*)-3-Bromocyclooct-1-ene 13 (400 MHz  $^1\text{H}$ ,  $\text{CDCl}_3$ )**

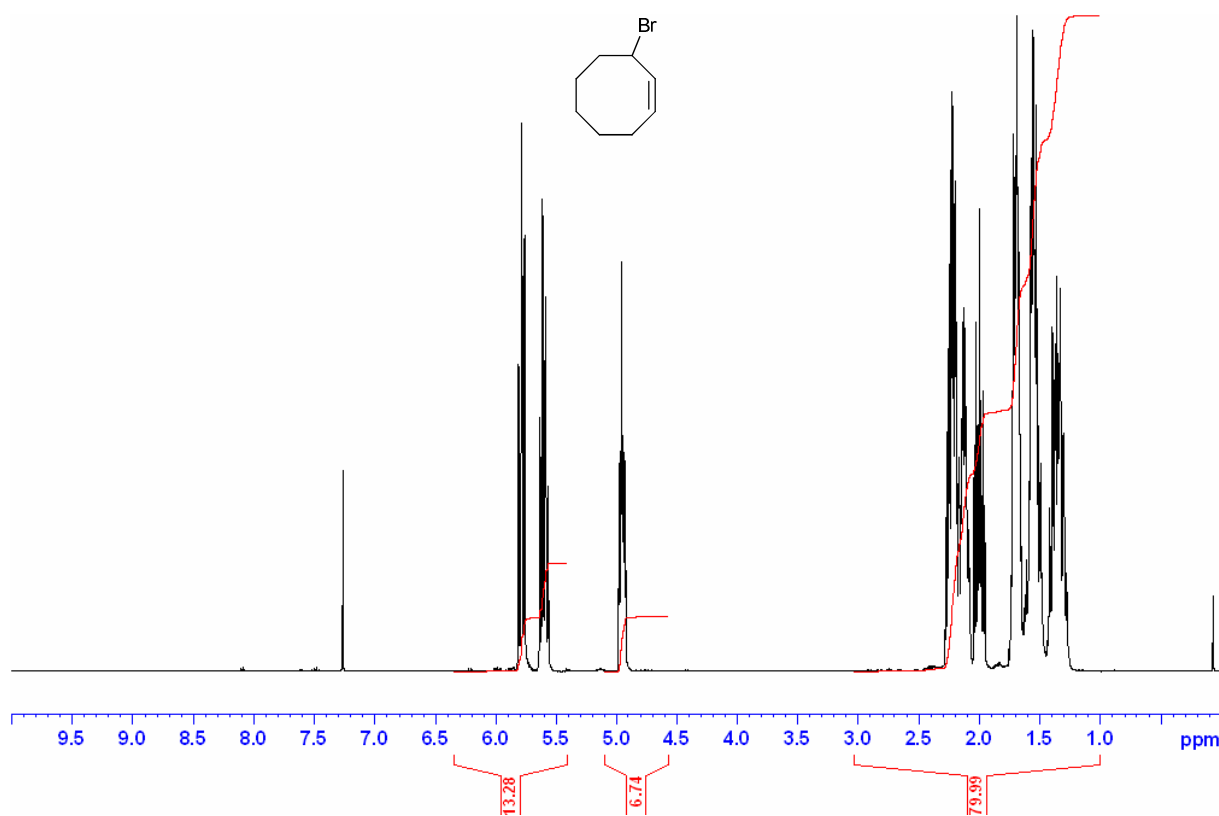

**(*RS*)-3-(*N,N*-Dibenzylamino)cyclopent-1-ene 14 (400 MHz  $^1\text{H}$ ,  $\text{CDCl}_3$ )**

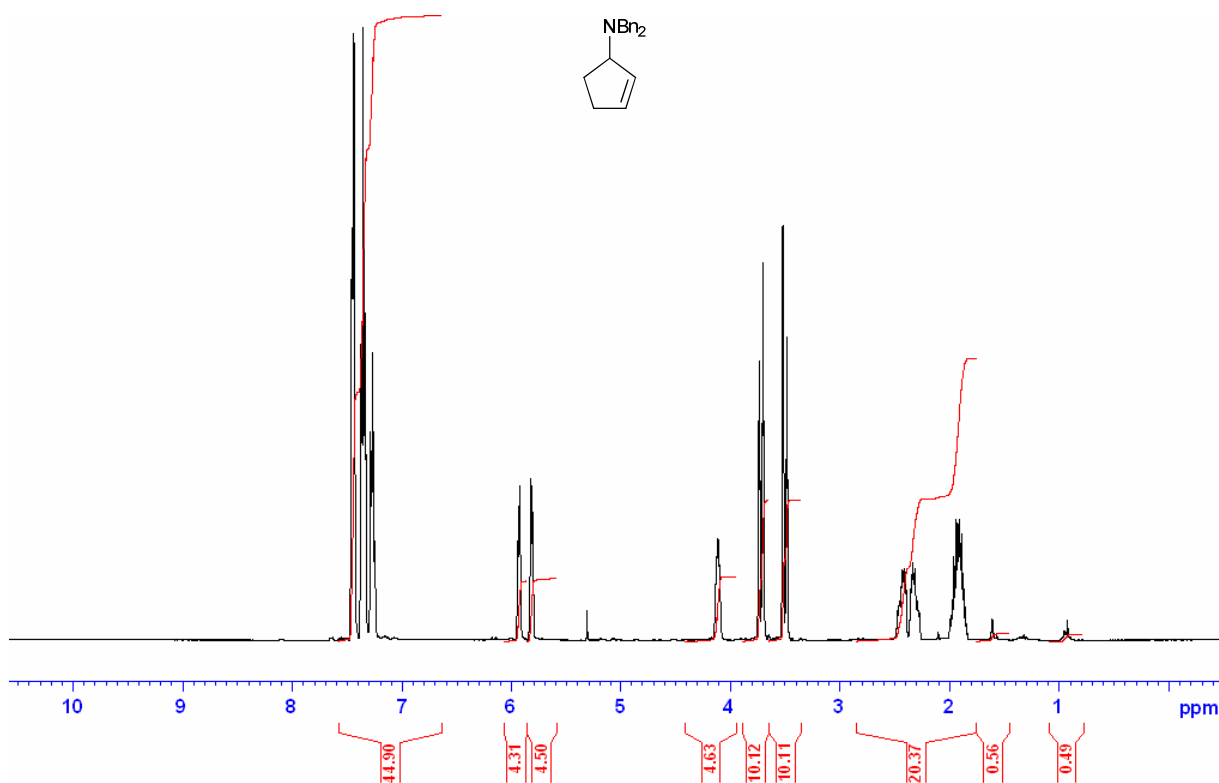

**(*RS*)-3-(*N,N*-Dibenzylamino)cyclopent-1-ene 14 (100 MHz  $^{13}\text{C}$ ,  $\text{CDCl}_3$ )**

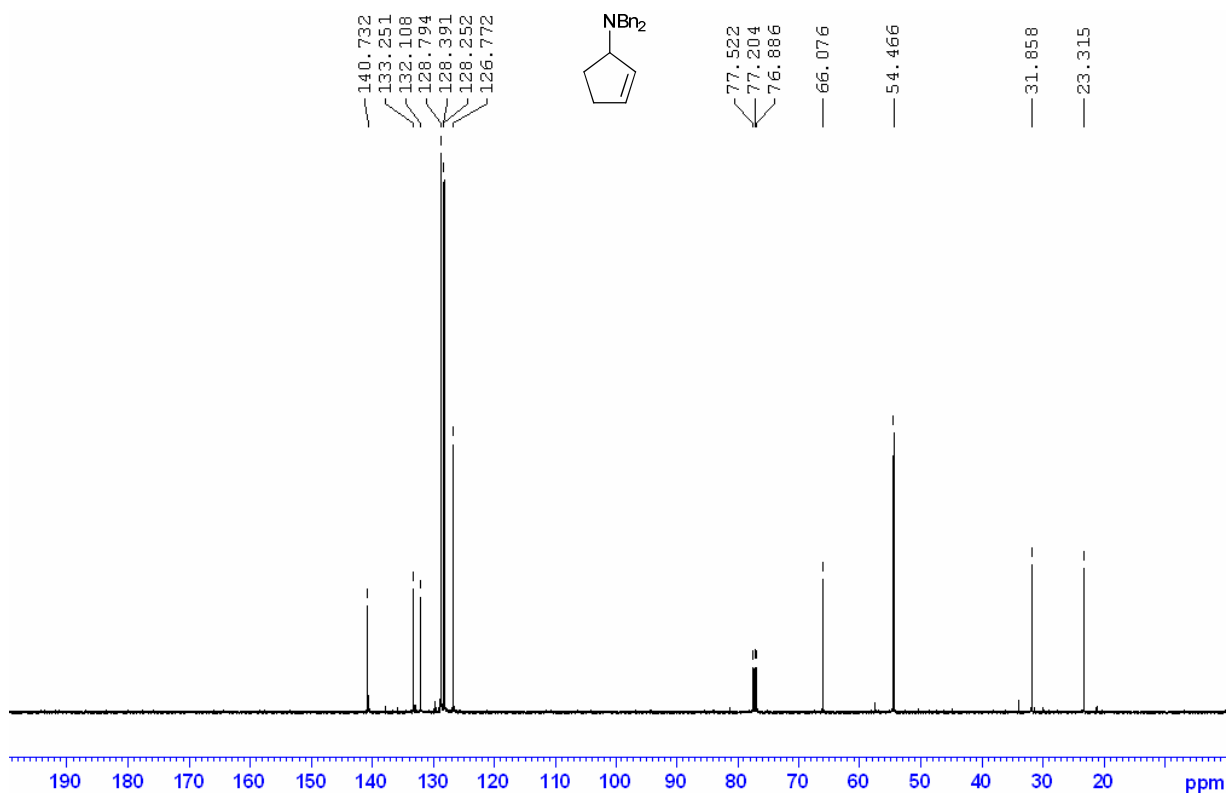

**(*RS*)-3-(*N,N*-Dibenzylamino)cyclohept-1-ene 15 (400 MHz  $^1\text{H}$ ,  $\text{CDCl}_3$ )**

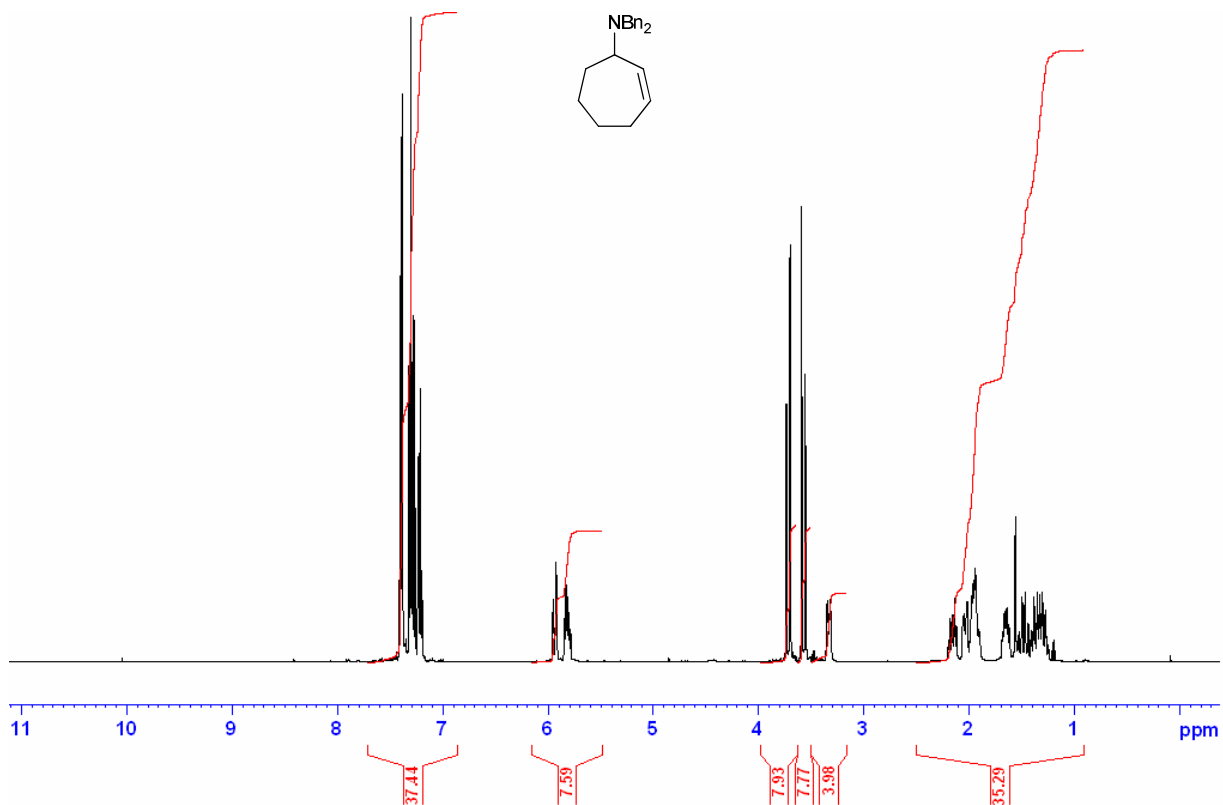

**(*RS*)-3-(*N,N*-Dibenzylamino)cyclohept-1-ene 15 (100 MHz  $^{13}\text{C}$ ,  $\text{CDCl}_3$ )**

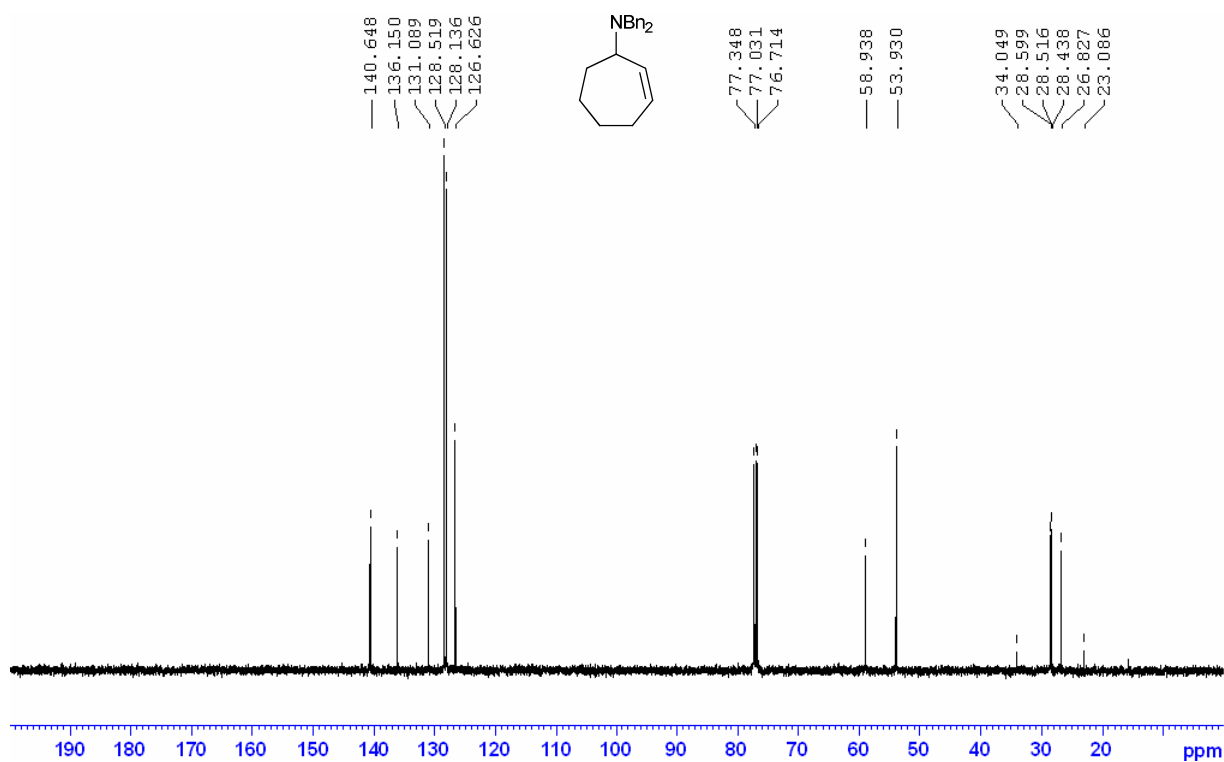

**(*RS,Z*)-3-(*N,N*-Dibenzylamino)cyclooct-1-ene 16 (400 MHz  $^1\text{H}$ ,  $\text{CDCl}_3$ )**

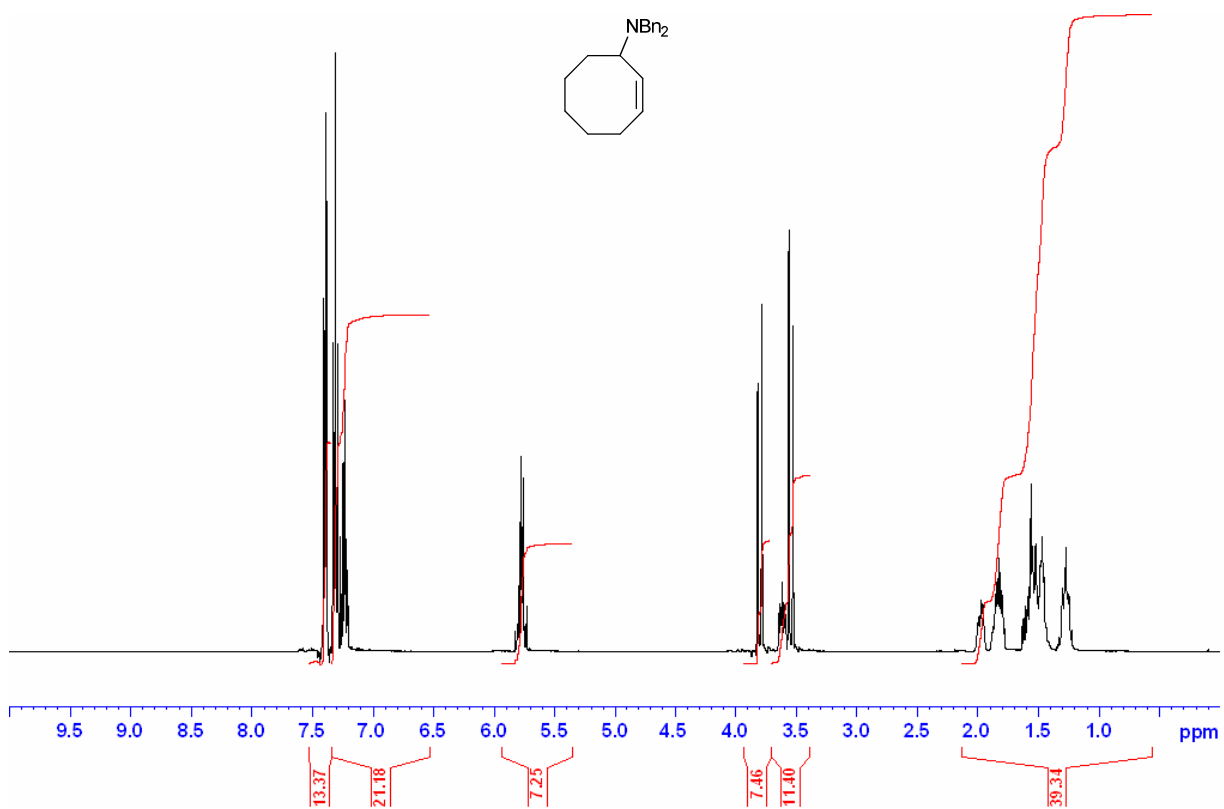

**(*RS,Z*)-3-(*N,N*-Dibenzylamino)cyclooct-1-ene 16 (100 MHz  $^{13}\text{C}$ ,  $\text{CDCl}_3$ )**

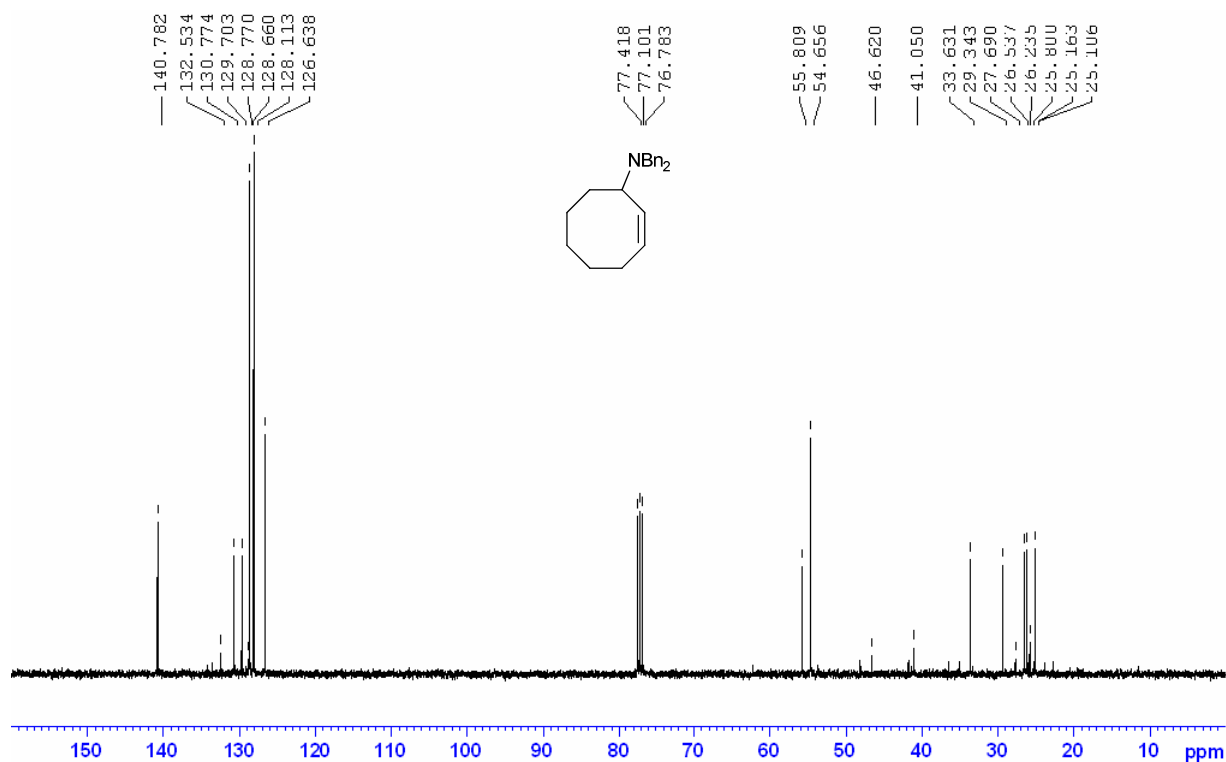

**(1*RS*,2*SR*,3*SR*)-1,2-Epoxy-3-(*N,N*-dibenzylamino)cyclopentane 20 (400 MHz  $^1\text{H}$ ,  $\text{CDCl}_3$ )**

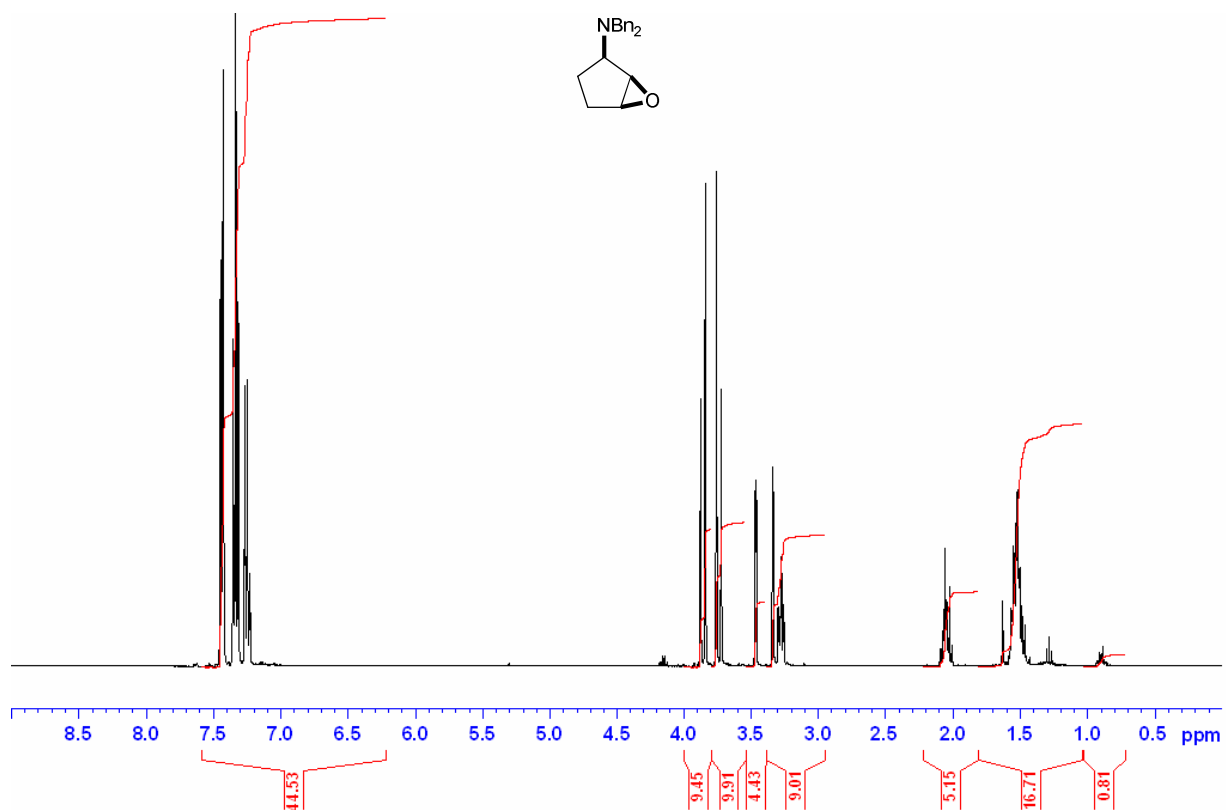

**(1*RS*,2*SR*,3*SR*)-1,2-Epoxy-3-(*N,N*-dibenzylamino)cyclopentane 20 (100 MHz  $^{13}\text{C}$ ,  $\text{CDCl}_3$ )**

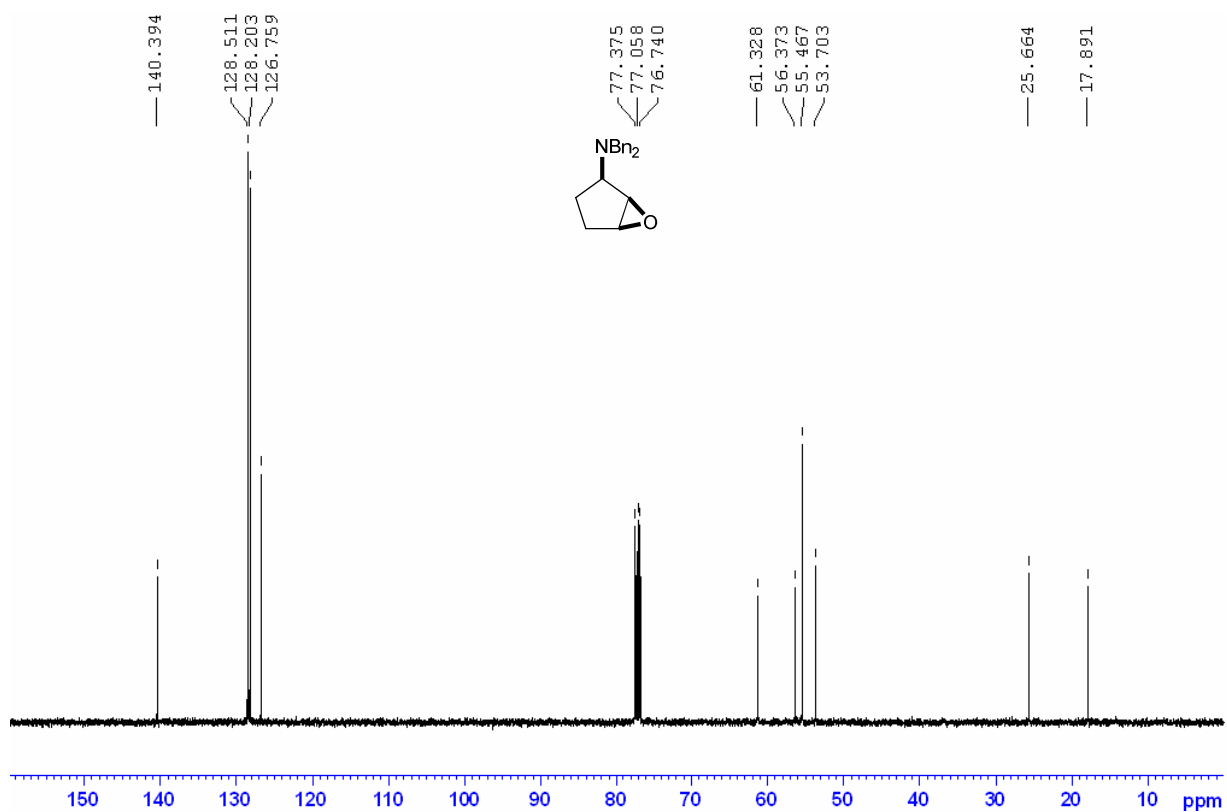

**(1*RS*,2*RS*,3*RS*)-1-Trichloroacetoxy-2-hydroxy-3-(*N,N*-dibenzylamino)cyclopentane 21**

(400 MHz  $^1\text{H}$ ,  $\text{CDCl}_3$ )

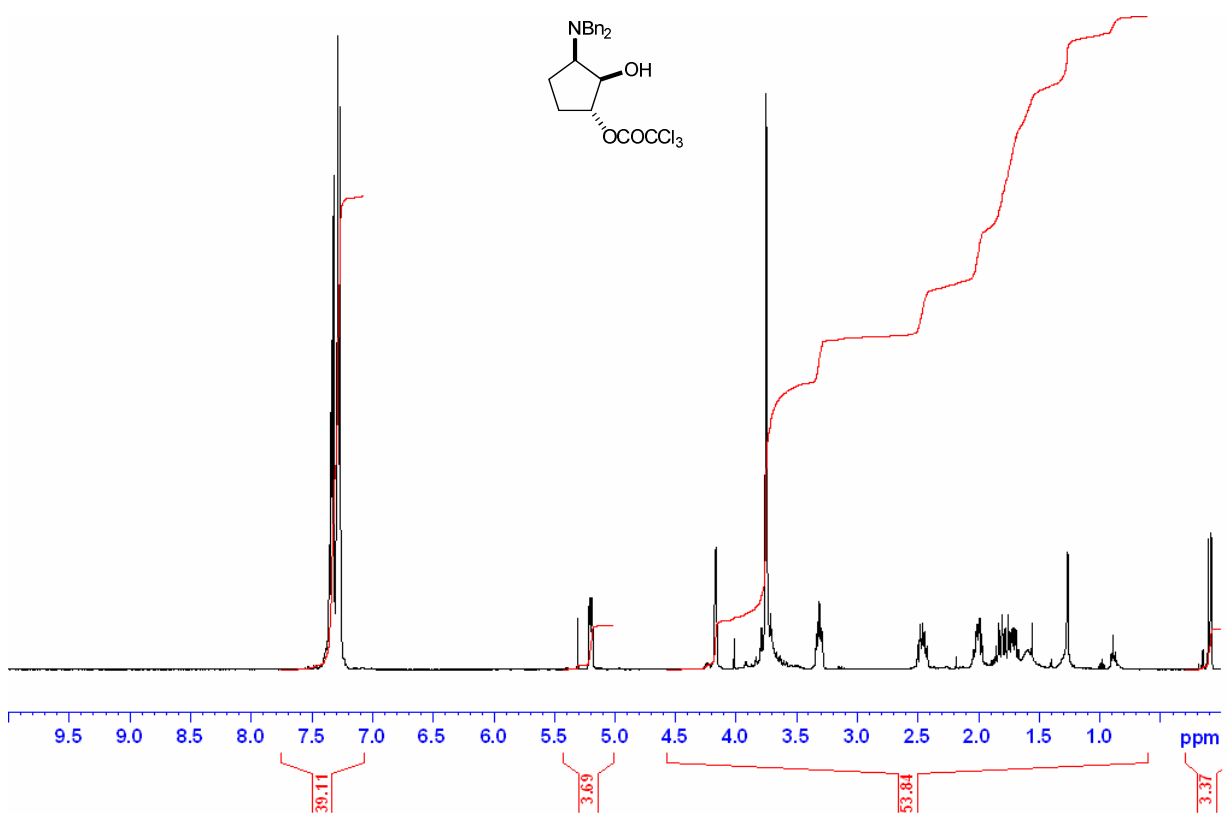

**(1*RS*,2*RS*,3*RS*)-1-Trichloroacetoxy-2-hydroxy-3-(*N,N*-dibenzylamino)cyclopentane 21**

**(100 MHz  $^{13}\text{C}$ ,  $\text{CDCl}_3$ )**

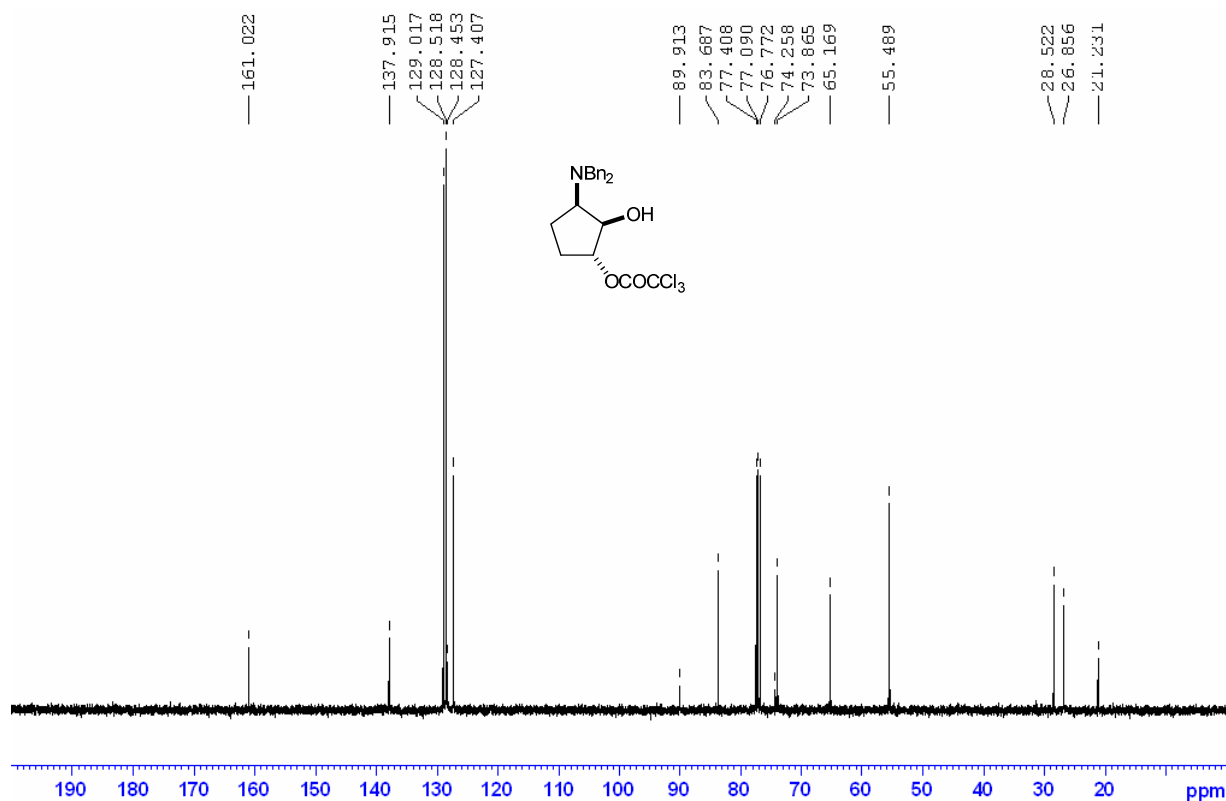

**(1*RS*,2*RS*,3*RS*)-1-Acetoxy-2-hydroxy-3-(*N,N*-dibenzylamino)cyclopentane 22 (400 MHz  $^1\text{H}$ ,  $\text{CDCl}_3$ )**

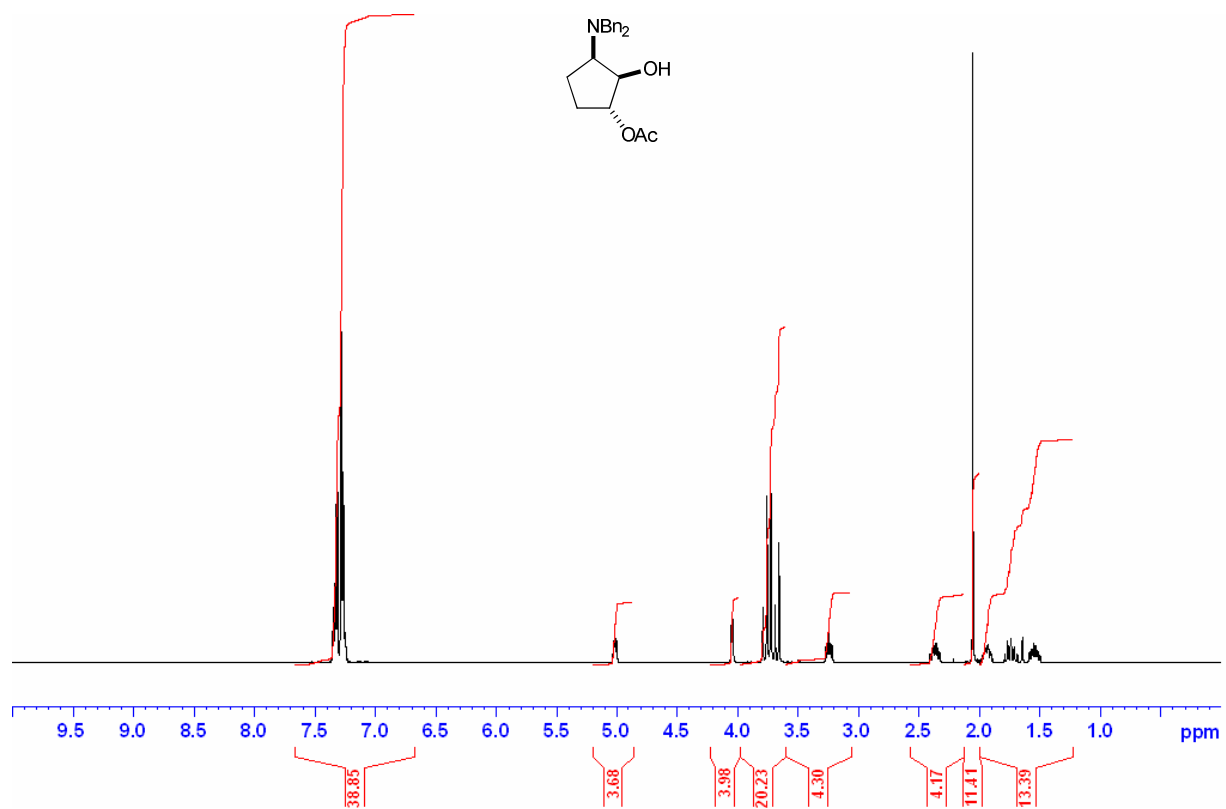



**(1*RS*,2*RS*,3*RS*)-1-Acetoxy-2-hydroxy-3-(*N,N*-dibenzylamino)cyclopentane 22 (100 MHz  $^{13}\text{C}$ ,  $\text{CDCl}_3$ )**

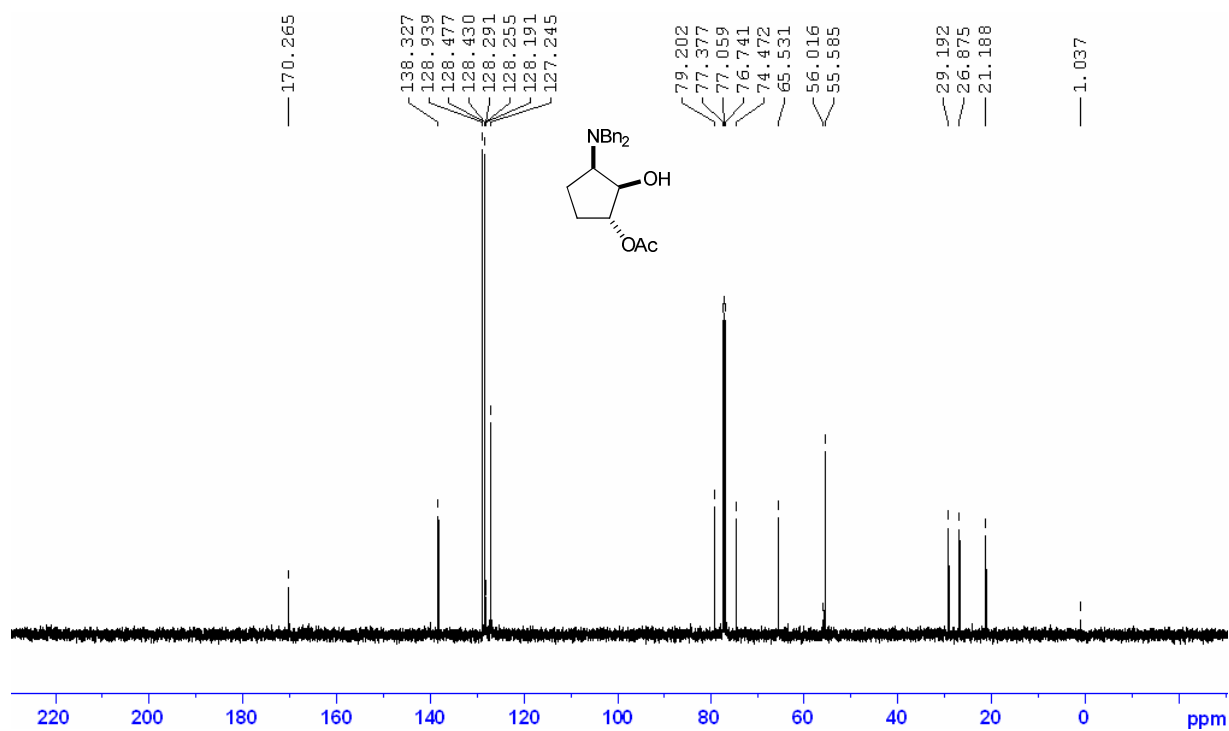

**(1*RS*,2*RS*,3*RS*)-1-*p*-Toluenesulfonyloxy-2-hydroxy-3-(*N,N*-dibenzylamino)cyclopentane 23**

**(400 MHz  $^1\text{H}$ ,  $\text{CDCl}_3$ )**

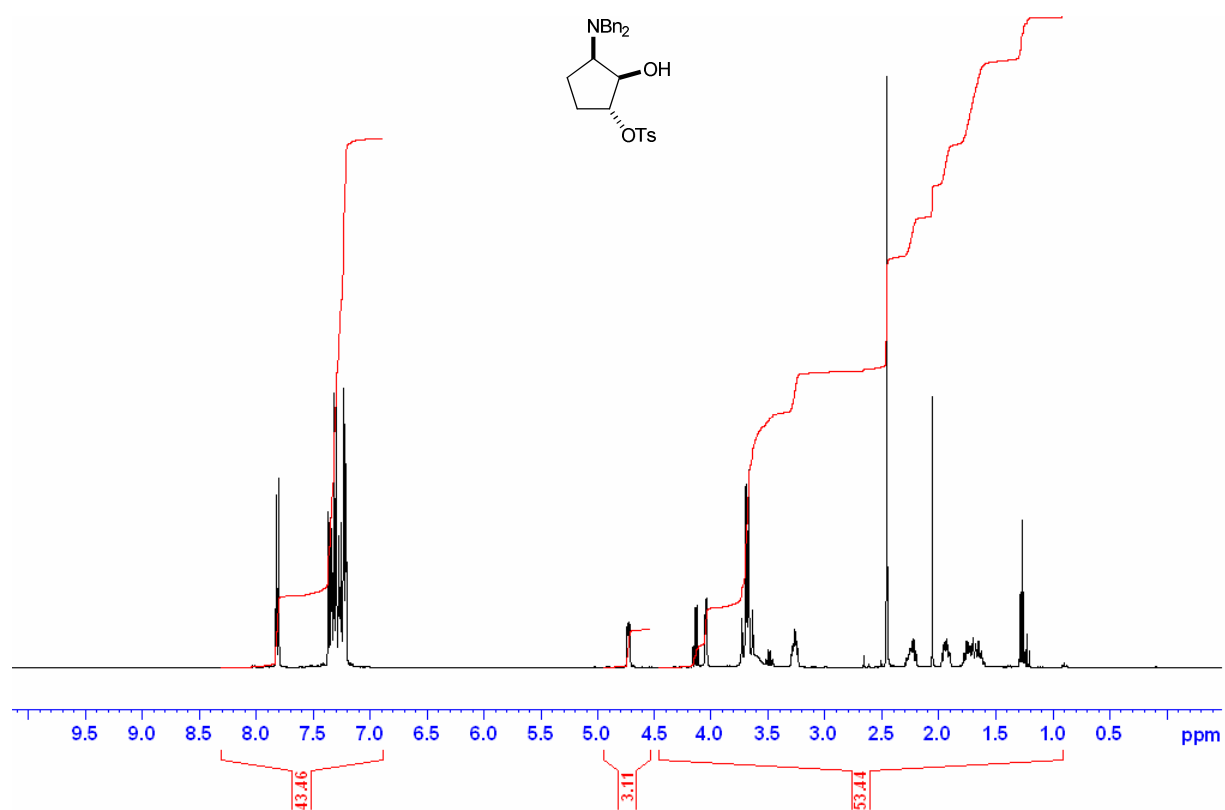

**(1*RS*,2*RS*,3*RS*)-1-*p*-Toluenesulfonyloxy-2-hydroxy-3-(*N,N*-dibenzylamino)cyclopentane 23**

**(100 MHz  $^{13}\text{C}$ ,  $\text{CDCl}_3$ )**

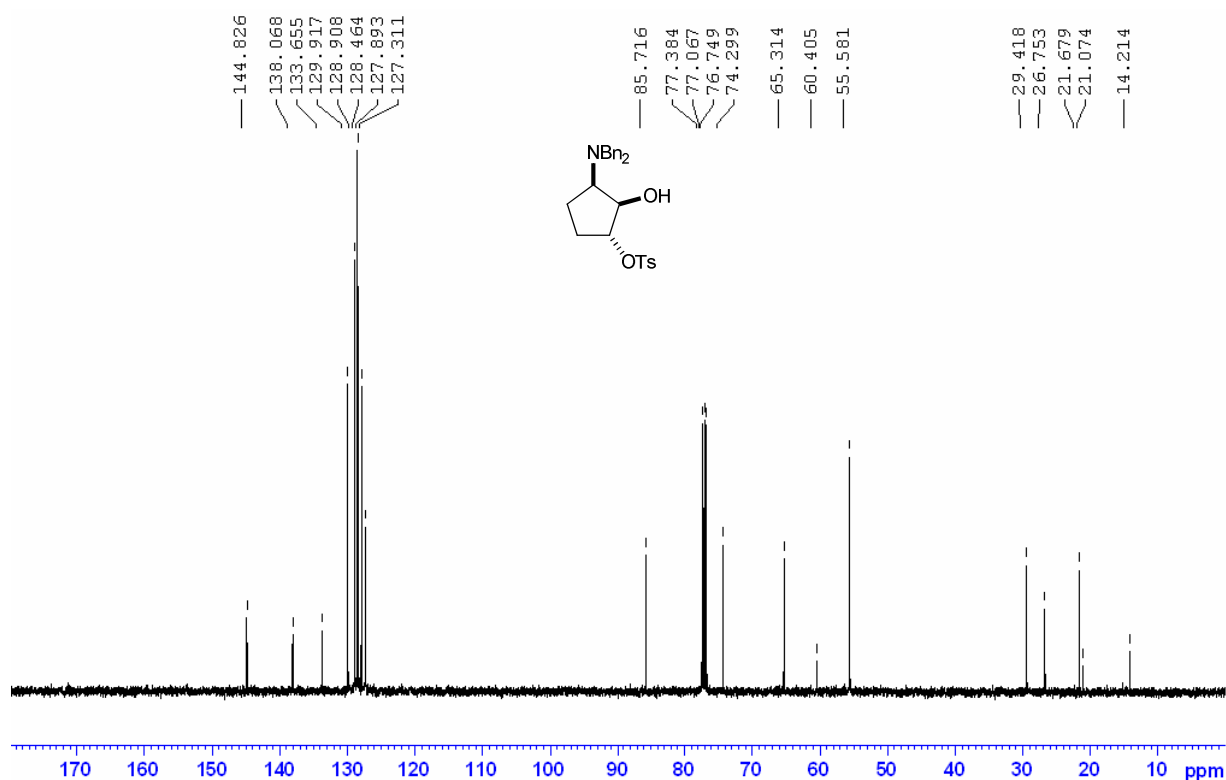

**(1*RS*,2*RS*,3*RS*)-3-(*N,N*-Dibenzylamino)cyclopentane-1,2-diol 24 (100 MHz  $^{13}\text{C}$ ,  $\text{CDCl}_3$ )**

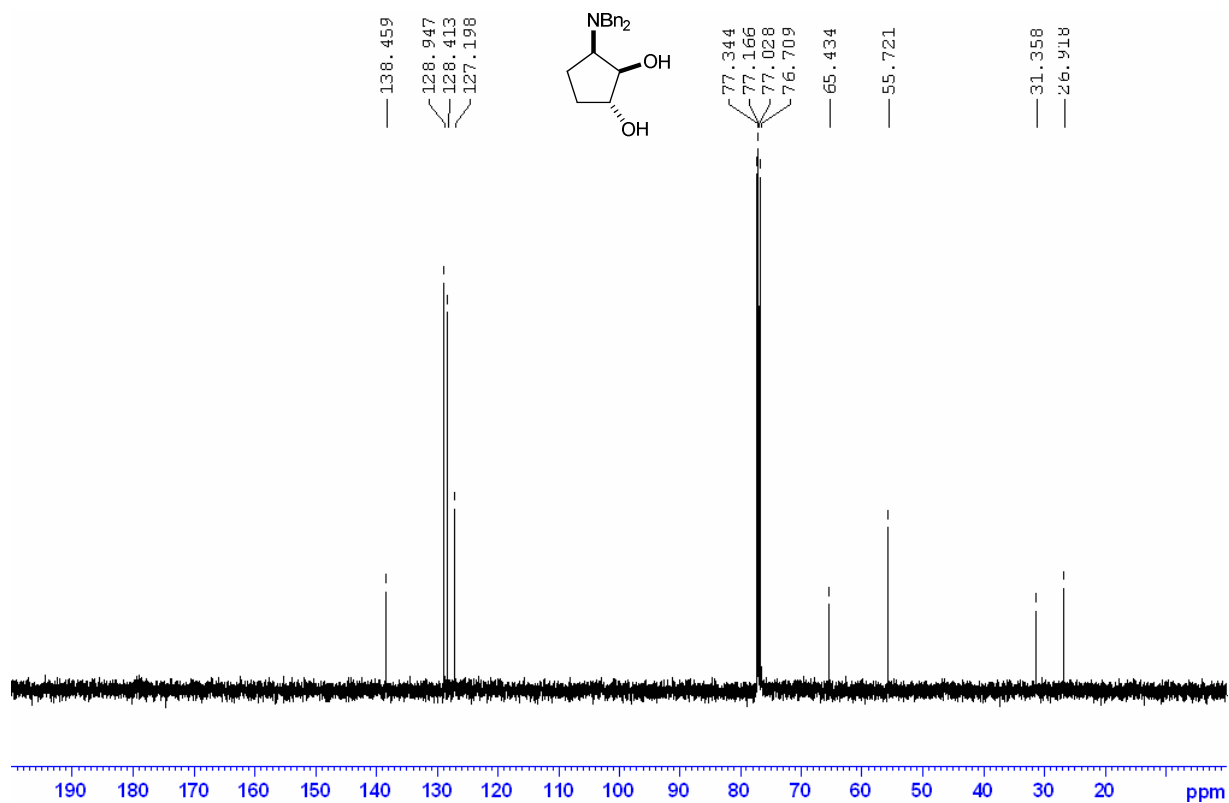

**(1*RS*,2*SR*,3*RS*)-1,2-Epoxy-3-(*N,N*-dibenzylamino)cyclooctane 25 (400 MHz  $^1\text{H}$ ,  $\text{CDCl}_3$ )**

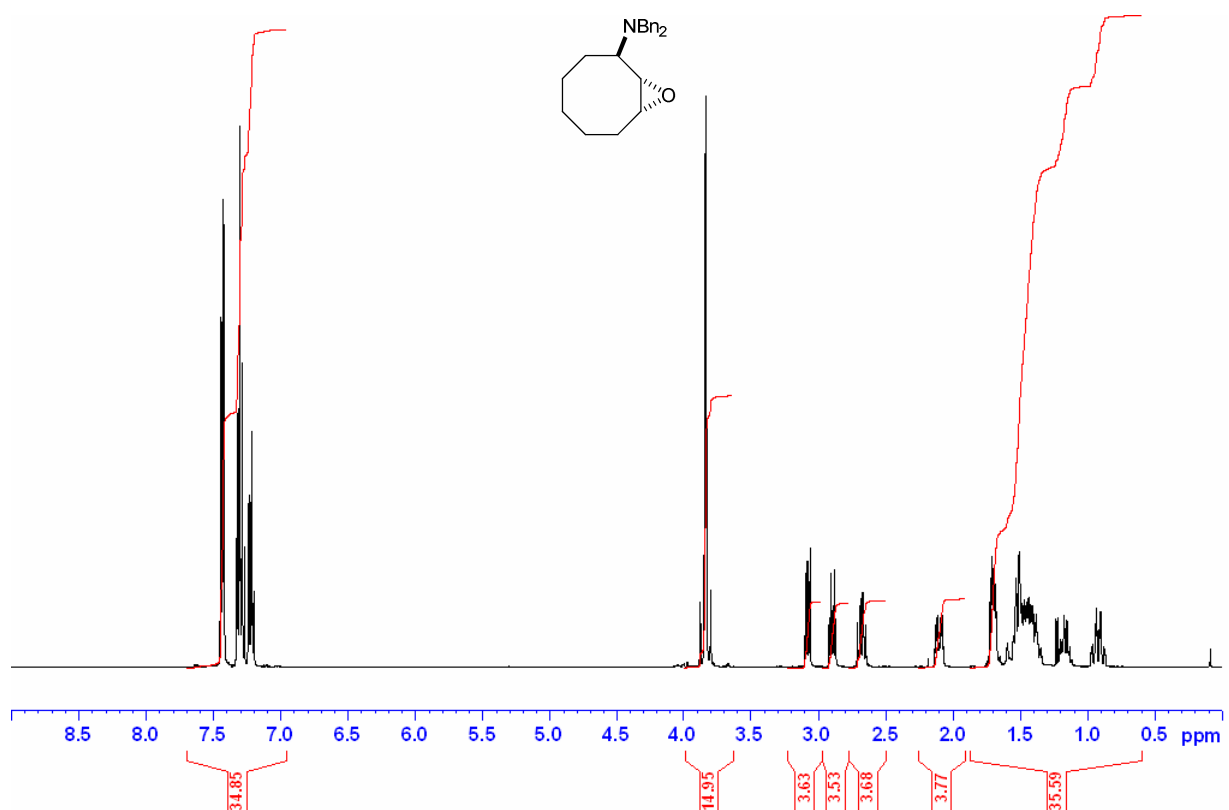

**(1*RS*,2*SR*,3*RS*)-1,2-Epoxy-3-(*N,N*-dibenzylamino)cyclooctane 25 (100 MHz  $^{13}\text{C}$ ,  $\text{CDCl}_3$ )**

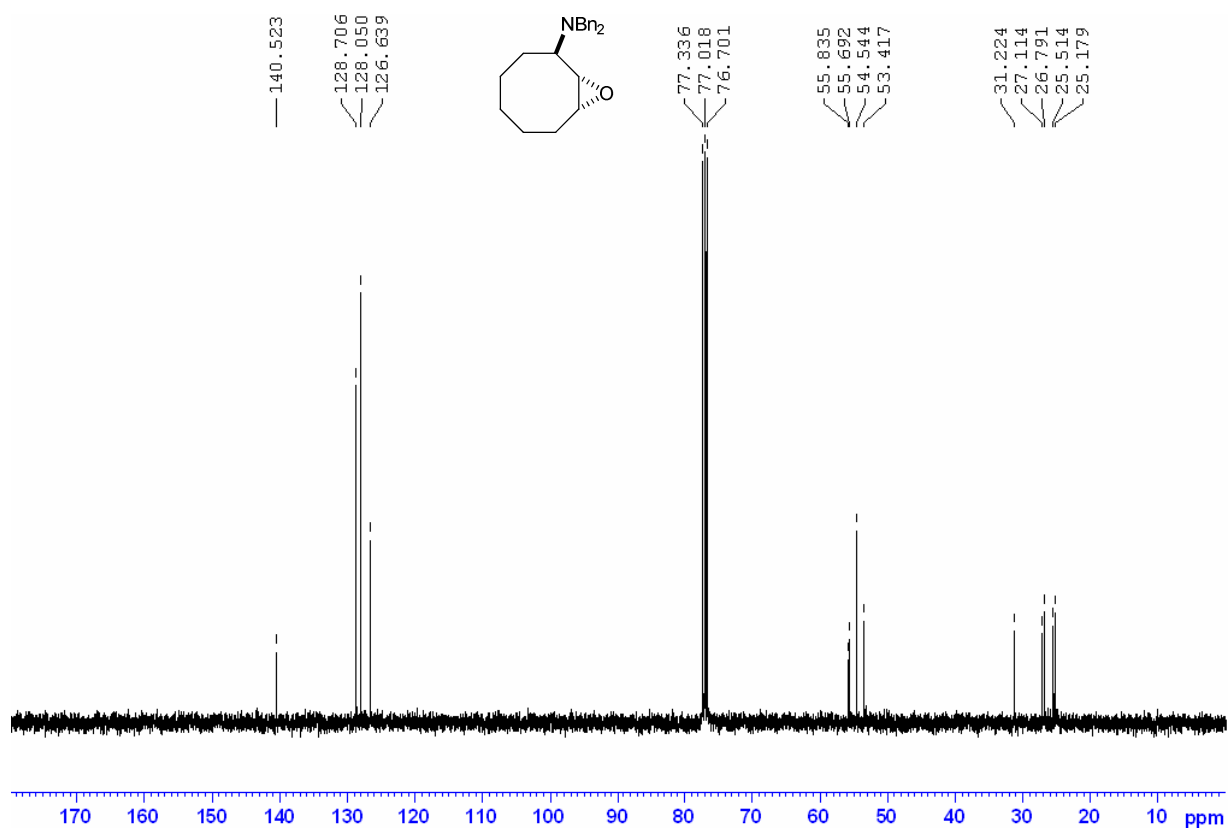

**(*RS,Z*)-3-(*N,N*-Dibenzyl-*N*-methyllummonio)cyclooct-1-ene trifluoromethanesulfonate 26**

**(400 MHz  $^1\text{H}$ ,  $\text{CDCl}_3$ )**

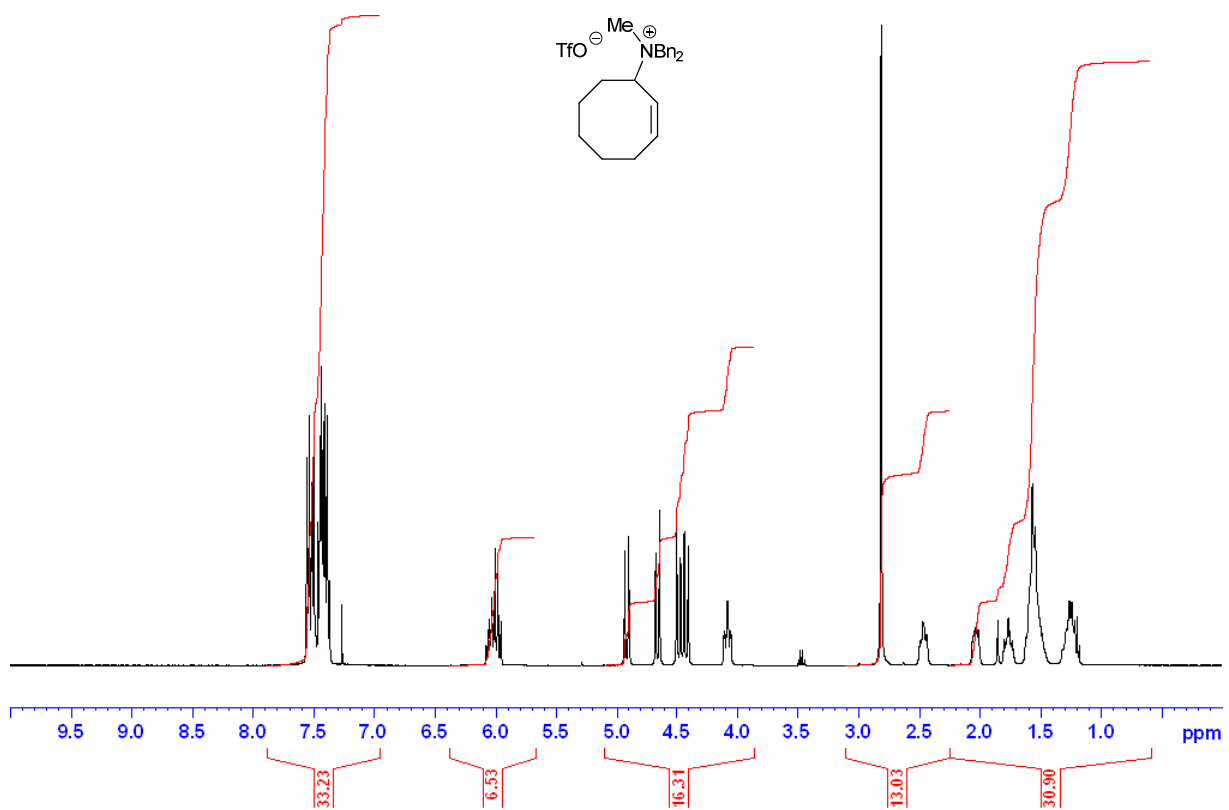

**(*RS,Z*)-3-(*N,N*-Dibenzyl-*N*-methylammonio)cyclooct-1-ene trifluoromethanesulfonate 26**

**(100 MHz  $^{13}\text{C}$ ,  $\text{CDCl}_3$ )**

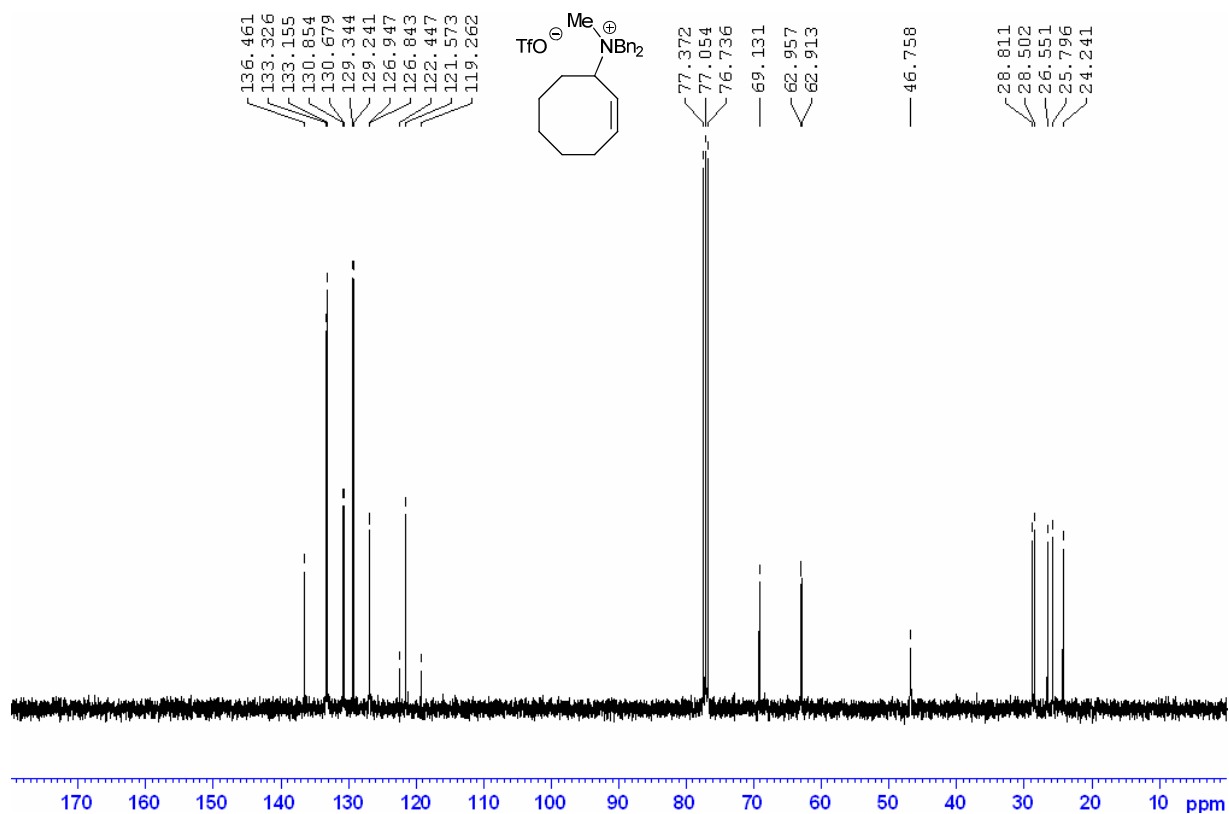

**(1*RS*,2*SR*,3*RS*)-1,2-Epoxy-3-(*N,N*-dibenzyl-*N*-methylammonio)cyclooctane**

**trifluoromethanesulfonate 27 (400 MHz  $^1\text{H}$ ,  $\text{CDCl}_3$ )**

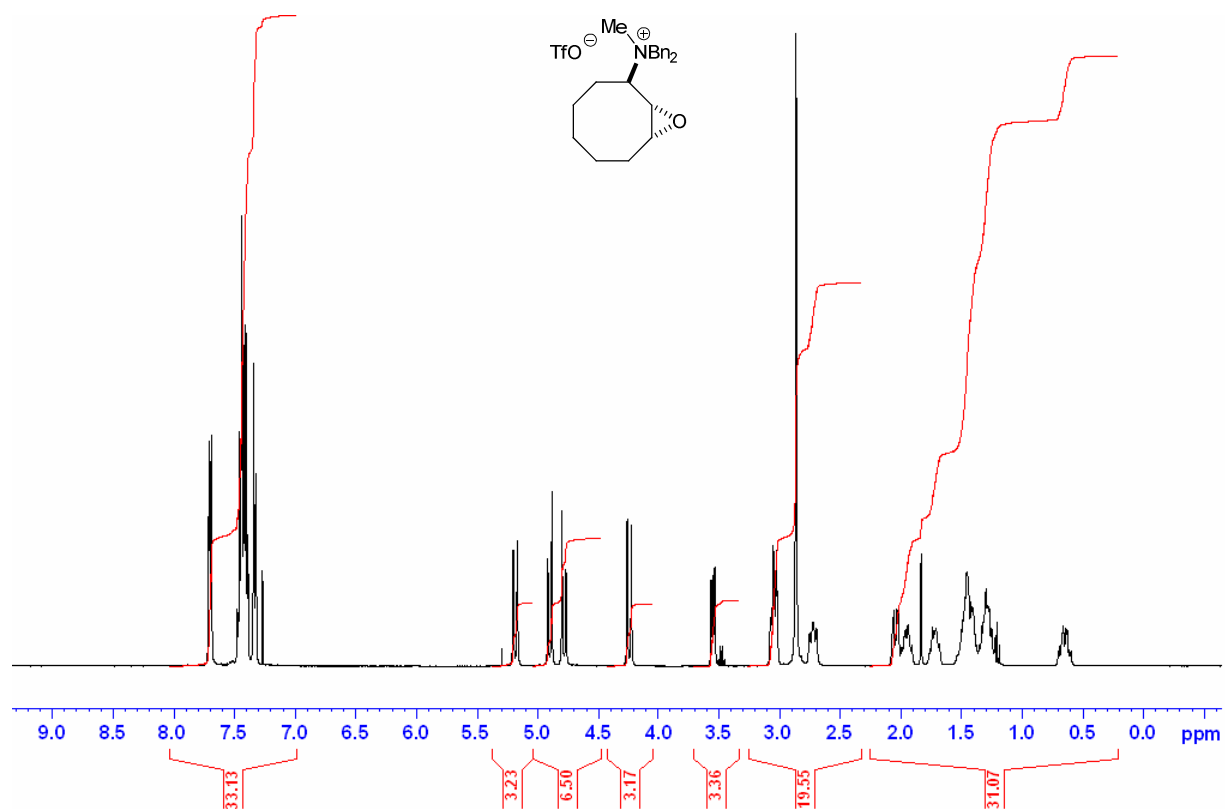

**(1*RS*,2*SR*,3*RS*)-1,2-Epoxy-3-(*N,N*-dibenzyl-*N*-methylammonio)cyclooctane**

**trifluoromethanesulfonate 27 (100 MHz  $^{13}\text{C}$ ,  $\text{CDCl}_3$ )**

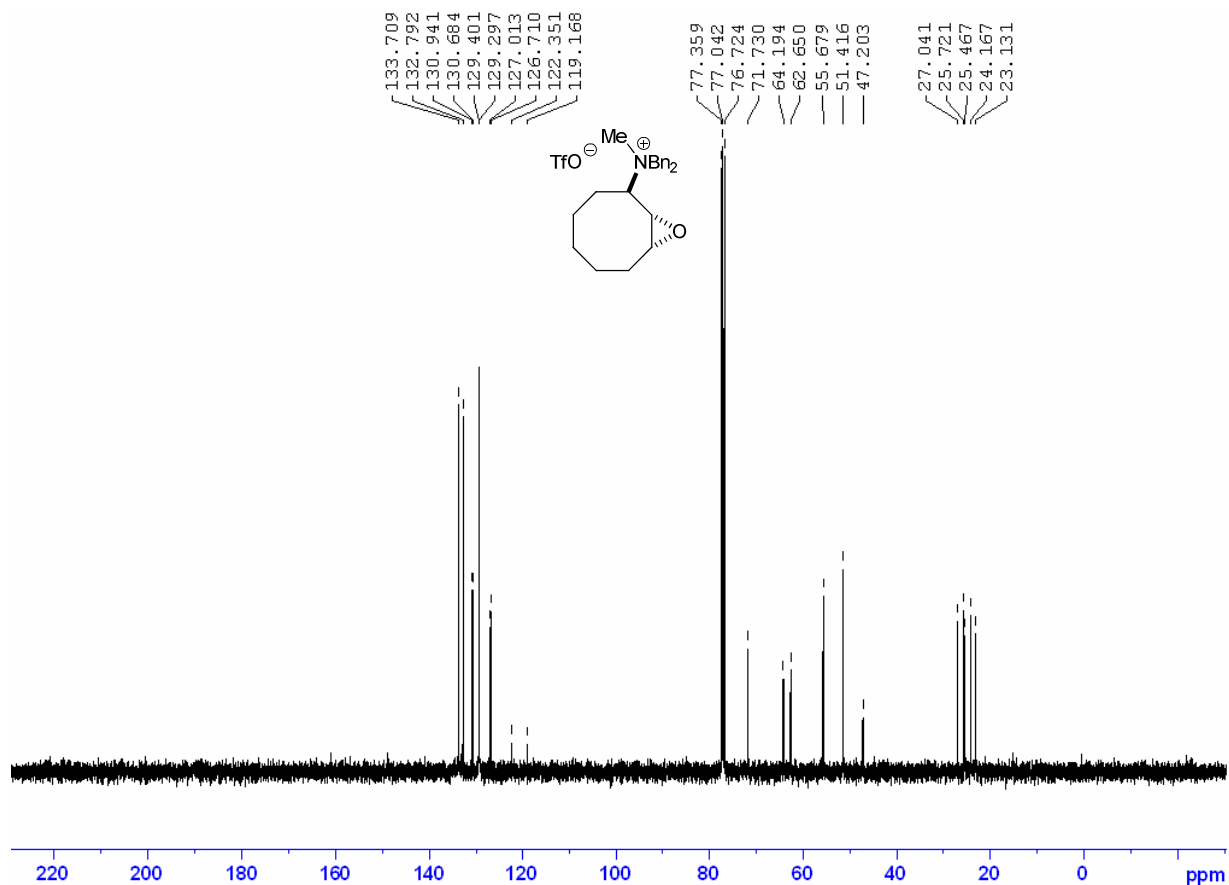

**(1*RS*,2*SR*,3*RS*)-1,2-Epoxy-3-(*N,N*-dibenzylamino)cycloheptane 28 (400 MHz  $^1\text{H}$ ,  $\text{CDCl}_3$ )**

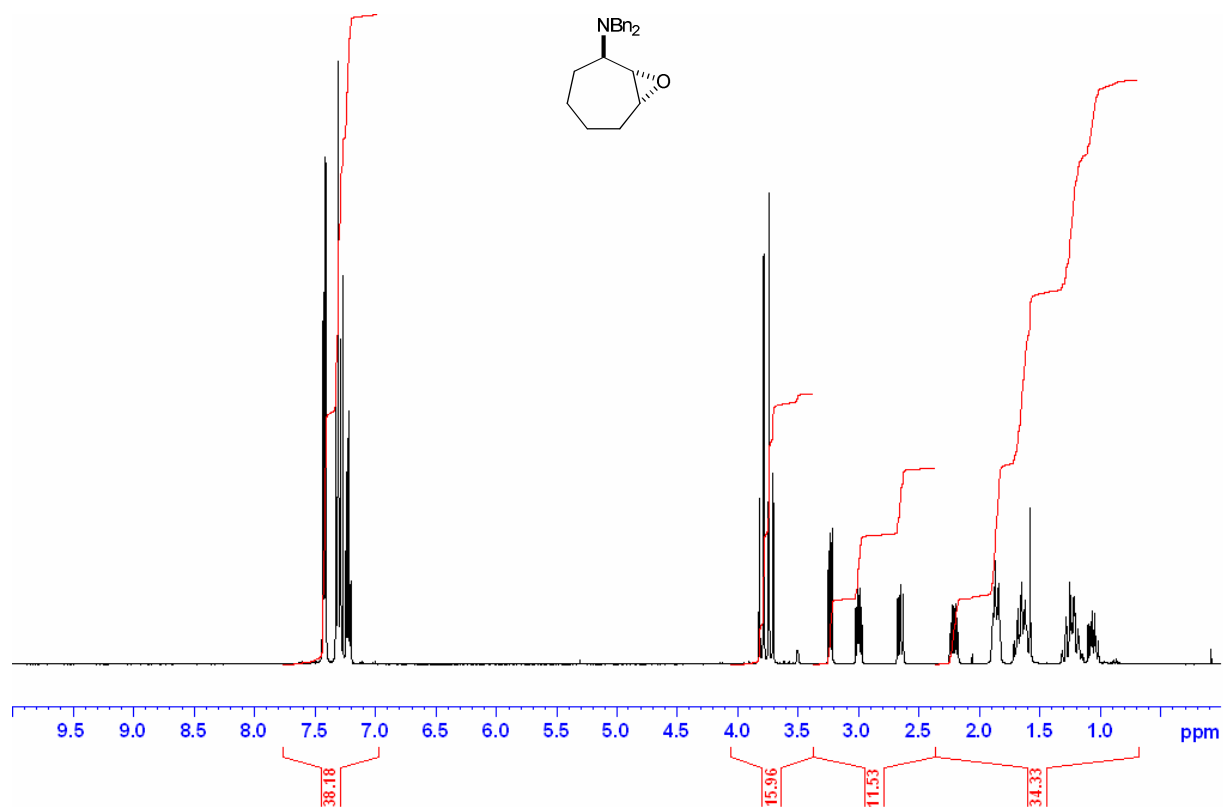

**(1*RS*,2*SR*,3*RS*)-1,2-Epoxy-3-(*N,N*-dibenzylamino)cycloheptane 28 (100 MHz  $^{13}\text{C}$ ,  $\text{CDCl}_3$ )**

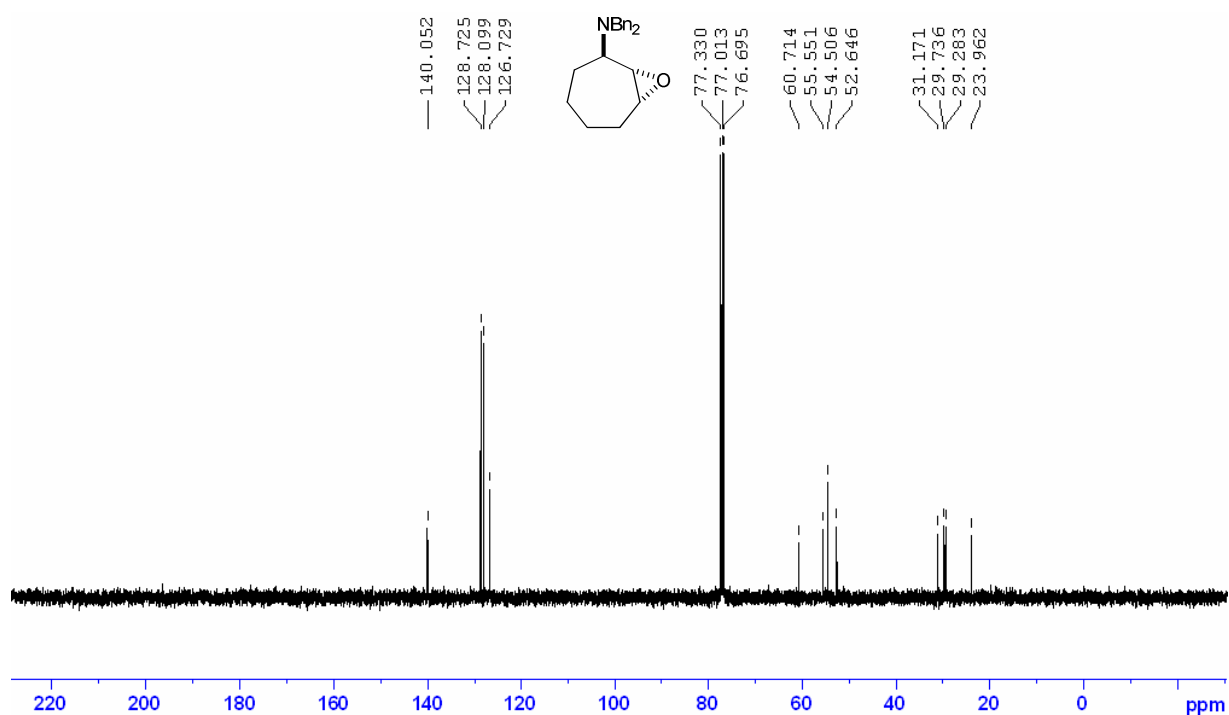

**(1*RS*,2*SR*,3*SR*)-1,2-Epoxy-3-(*N,N*-dibenzylamino)cycloheptane 29 (400 MHz  $^1\text{H}$ ,  $\text{CDCl}_3$ )**

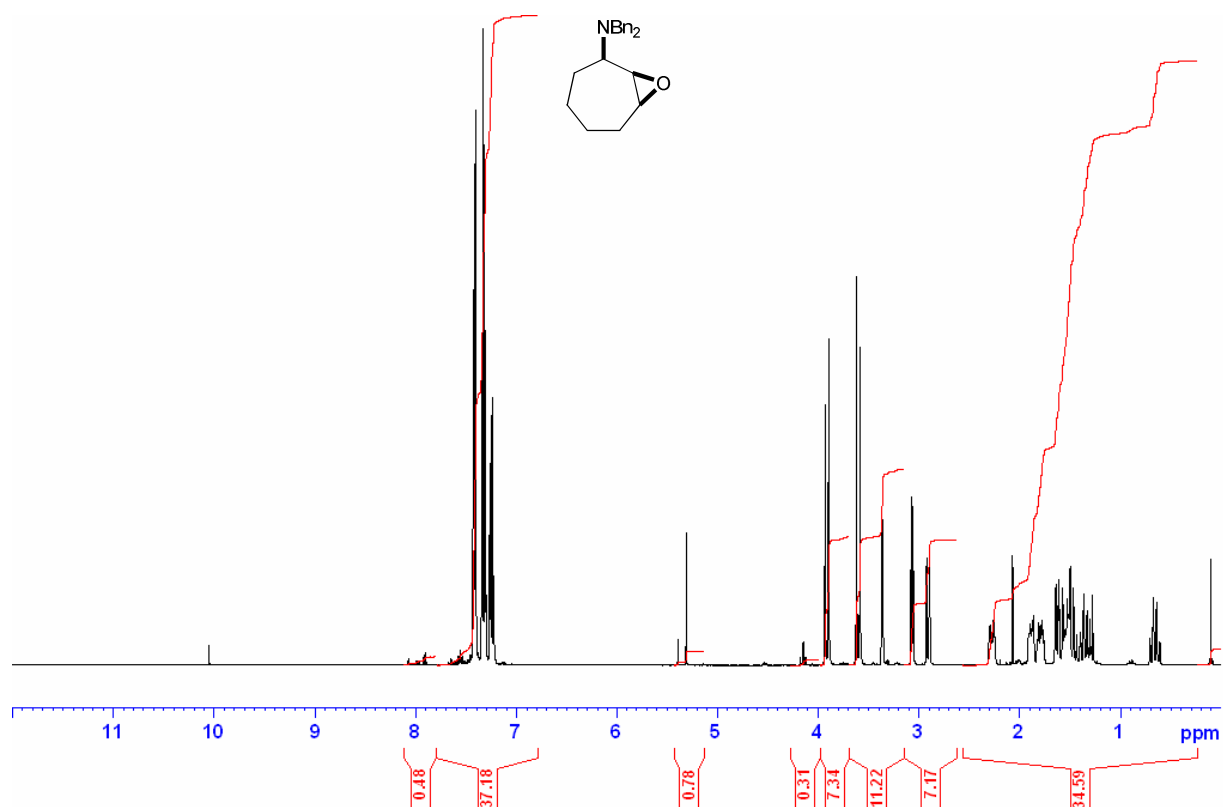

**(1*RS*,2*SR*,3*SR*)-1,2-Epoxy-3-(*N,N*-dibenzylamino)cycloheptane 29 (100 MHz  $^{13}\text{C}$ ,  $\text{CDCl}_3$ )**

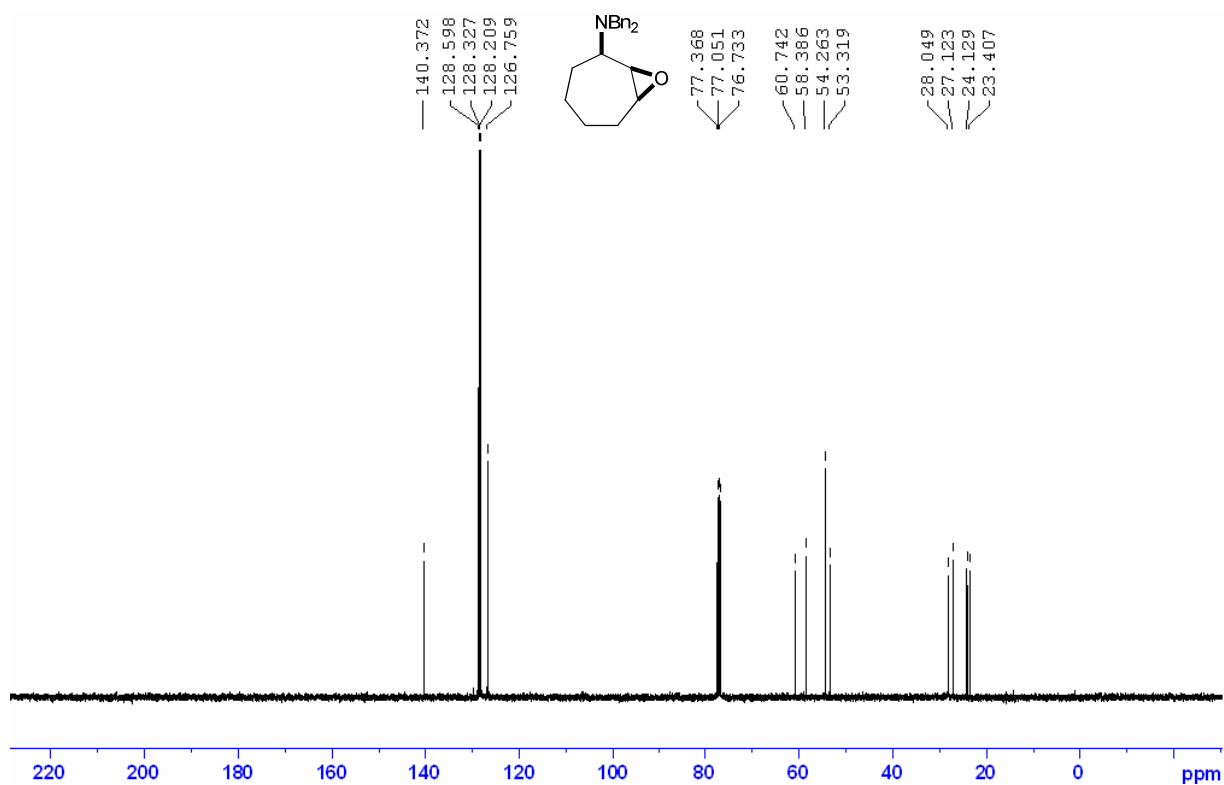

**(*RS*)-3-(*N,N*-Dibenzyl-*N*-methyllummonio)cyclohept-1-ene trifluoromethanesulfonate 30**

**(400 MHz  $^1\text{H}$ ,  $\text{CDCl}_3$ )**

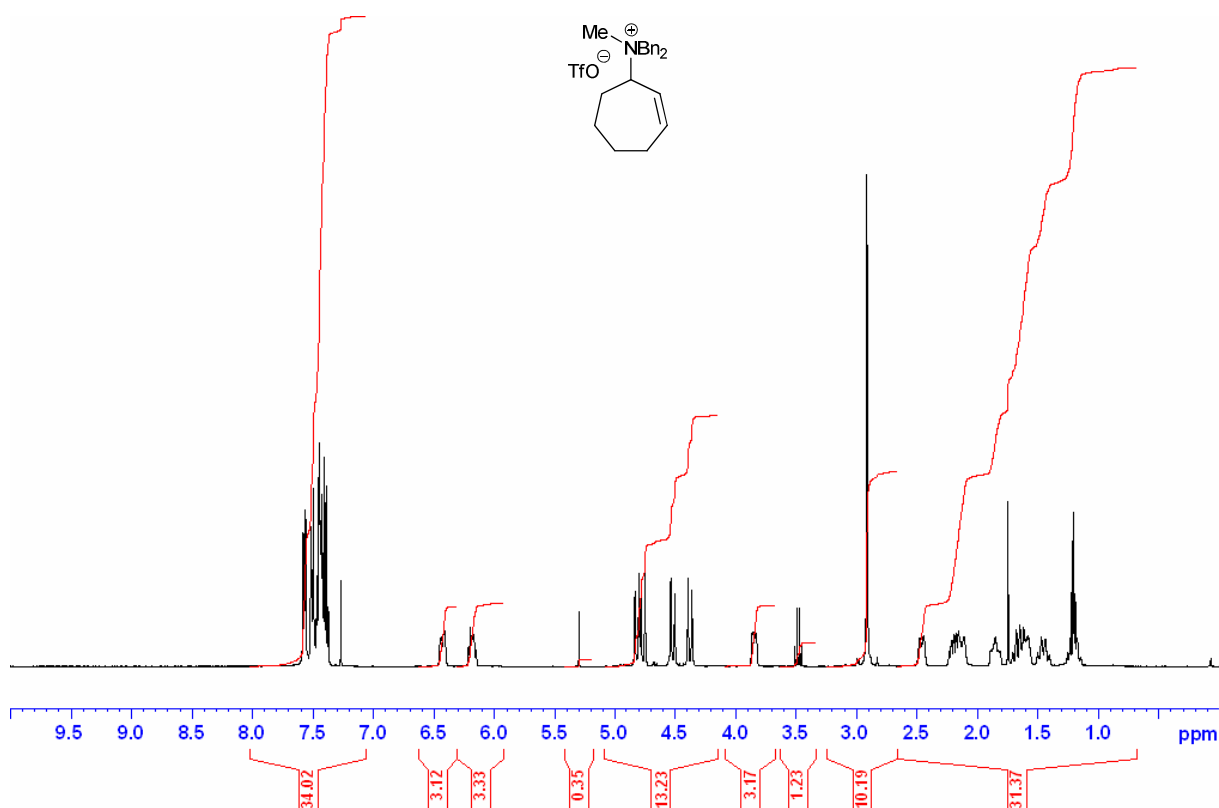



**(*RS*)-3-(*N,N*-Dibenzyl-*N*-methylammonio)cyclohept-1-ene trifluoromethanesulfonate 30**

**(100 MHz  $^{13}\text{C}$ ,  $\text{CDCl}_3$ )**

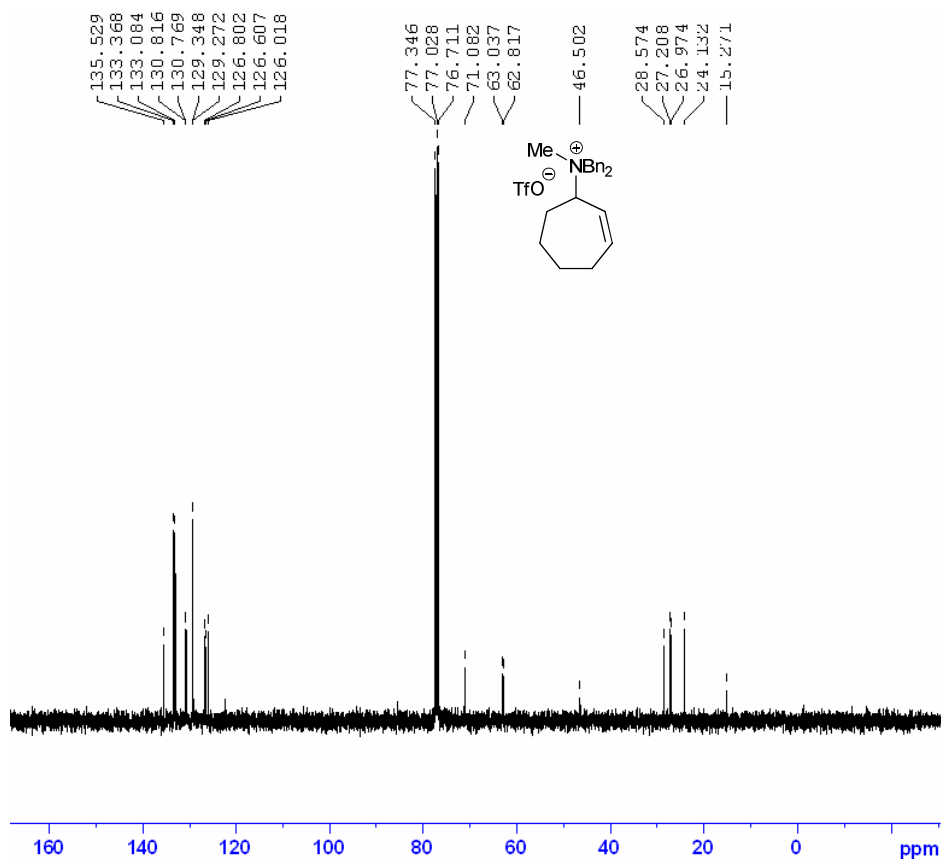

**(1*RS*,2*SR*,3*RS*)-1,2-Epoxy-3-(*N,N*-dibenzyl-*N*-methylammonio)cycloheptane**

**trifluoromethanesulfonate 31 (400 MHz  $^1\text{H}$ ,  $\text{CDCl}_3$ )**

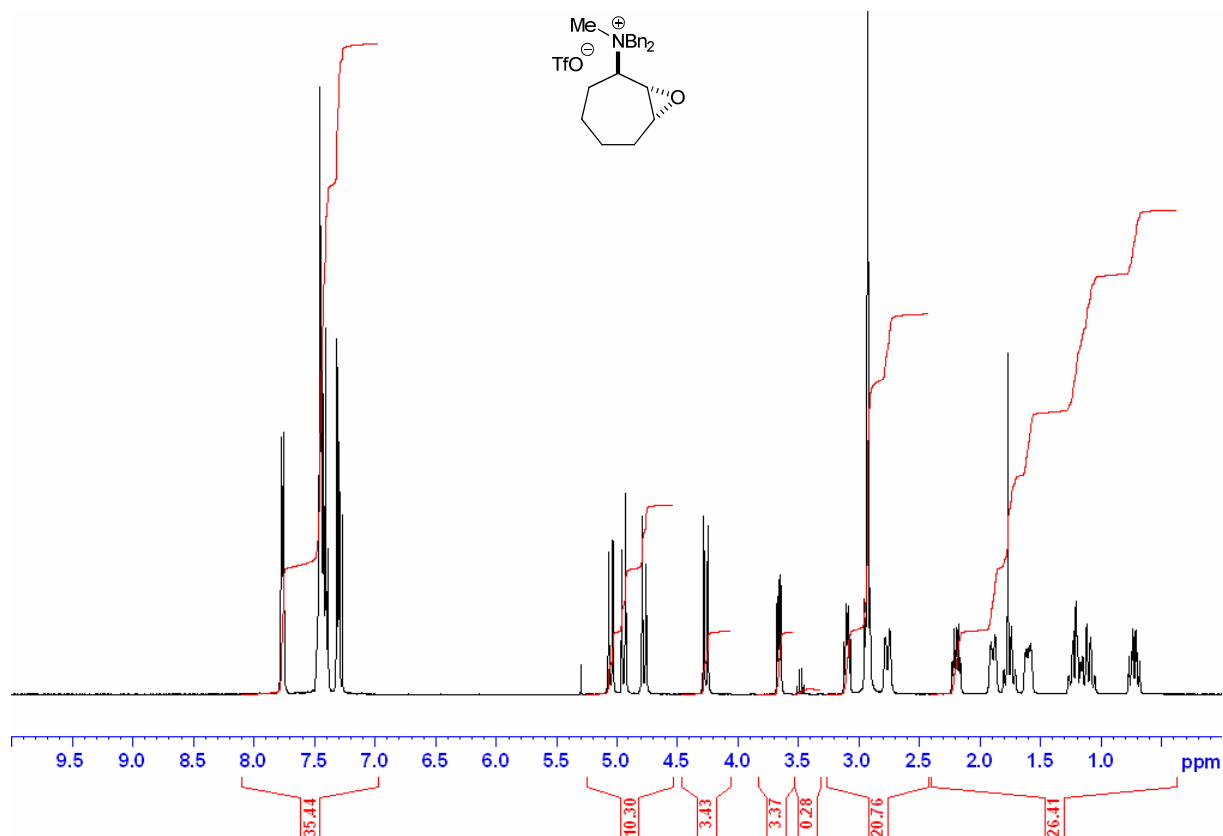

**(1*RS*,2*SR*,3*RS*)-1,2-Epoxy-3-(*N,N*-dibenzyl-*N*-methyllummonio)cycloheptane**

**trifluoromethanesulfonate 31 (100 MHz  $^{13}\text{C}$ ,  $\text{CDCl}_3$ )**

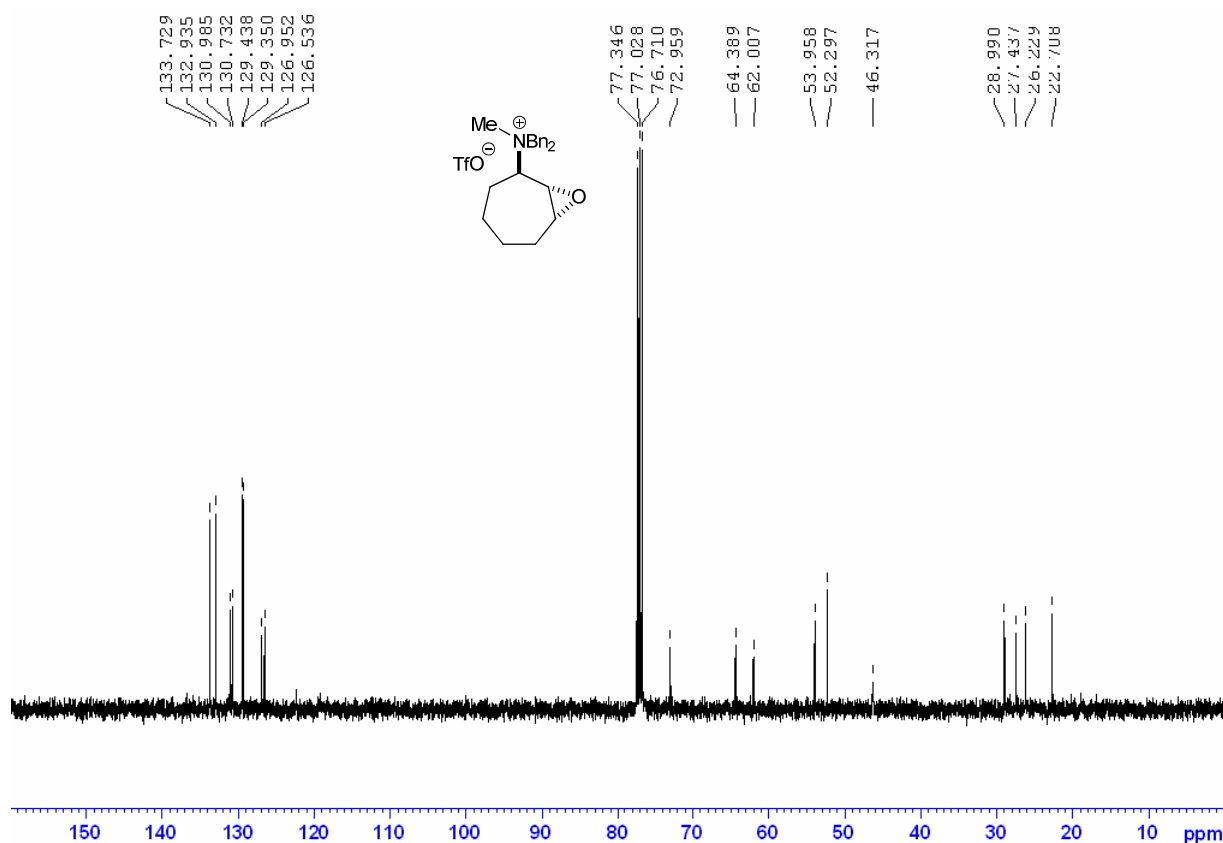

**(1*RS*,2*RS*,3*RS*)-1-Acetoxy-2-methanesulfonyloxy-3-(*N,N*-dibenzylamino)cyclopentane 33**

**(400 MHz  $^1\text{H}$ ,  $\text{CDCl}_3$ )**

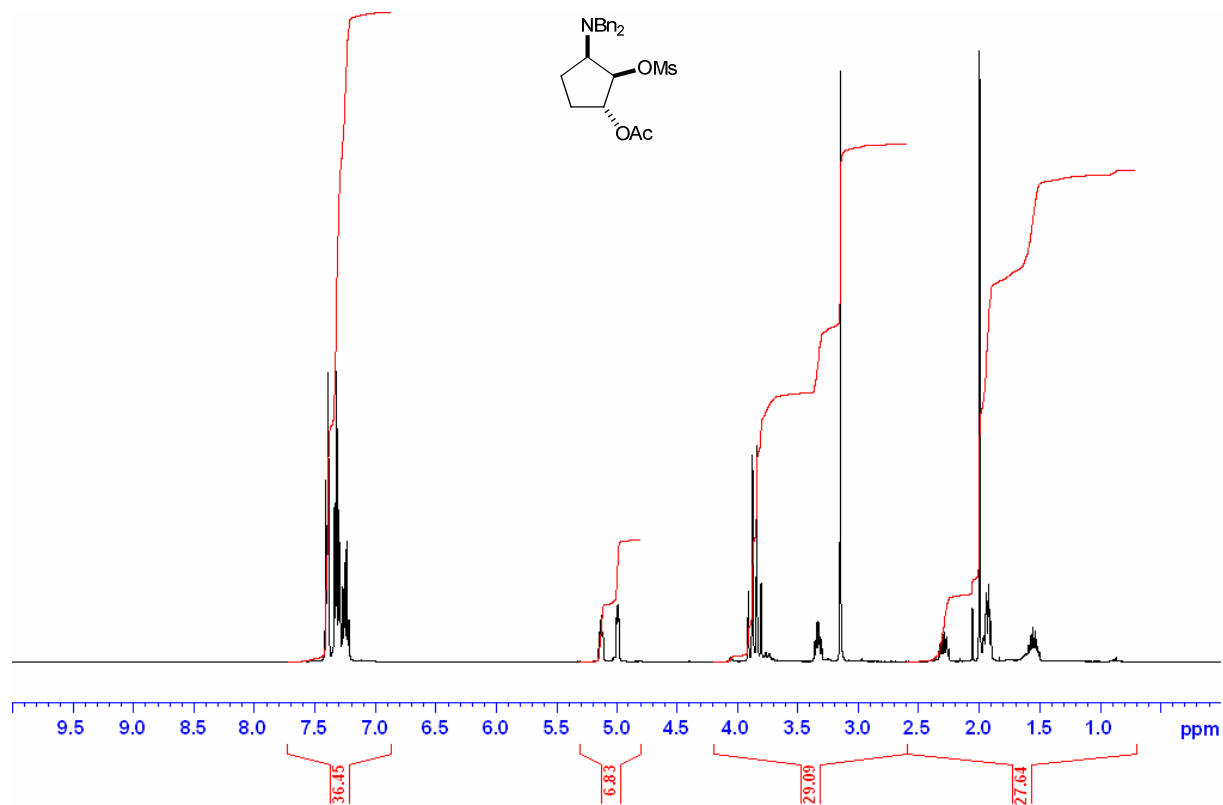

**(1*RS*,2*RS*,3*RS*)-1-Acetoxy-2-methanesulfonyloxy-3-(*N,N*-dibenzylamino)cyclopentane 33**

**(100 MHz  $^{13}\text{C}$ ,  $\text{CDCl}_3$ )**

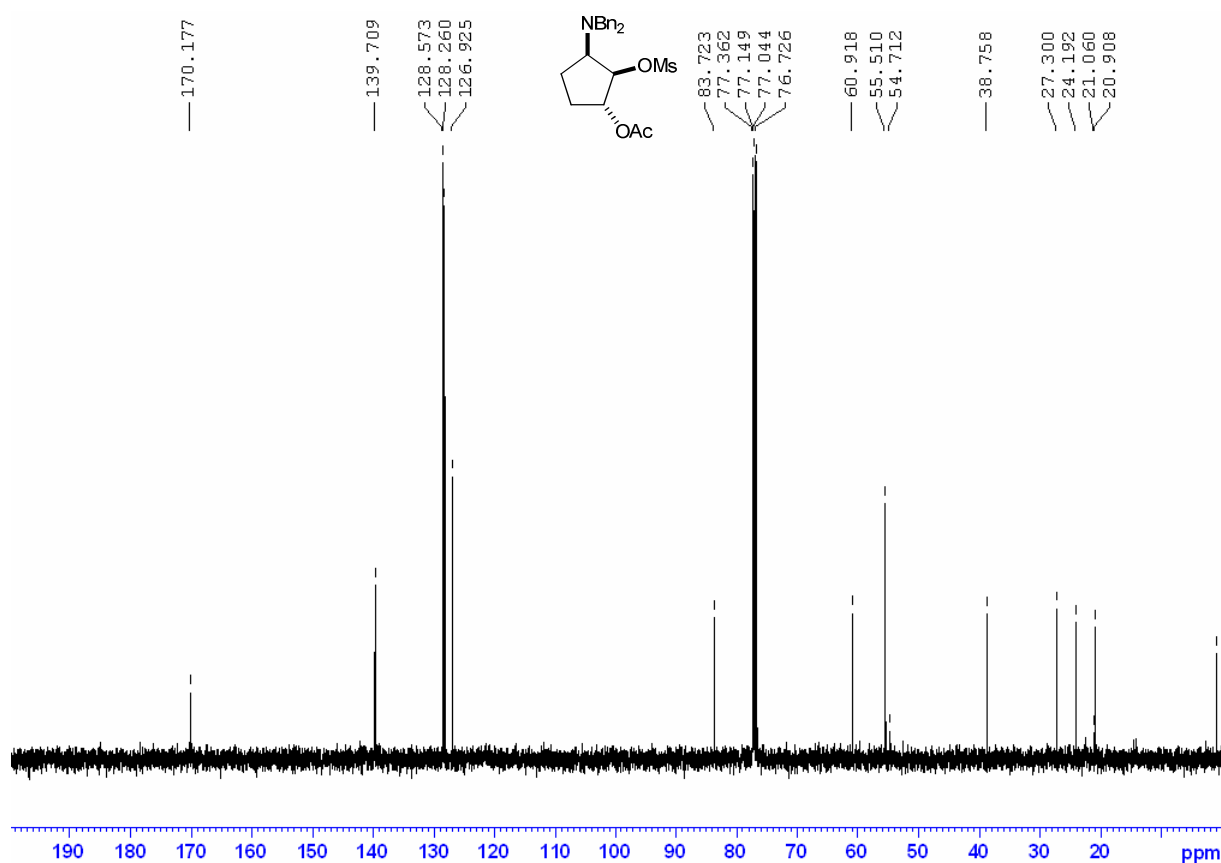

**(1*RS*,2*SR*,3*RS*)-1,2-Epoxy-3-(*N,N*-dibenzylamino)cyclopentane 34 (400 MHz  $^1\text{H}$ ,  $\text{CDCl}_3$ )**

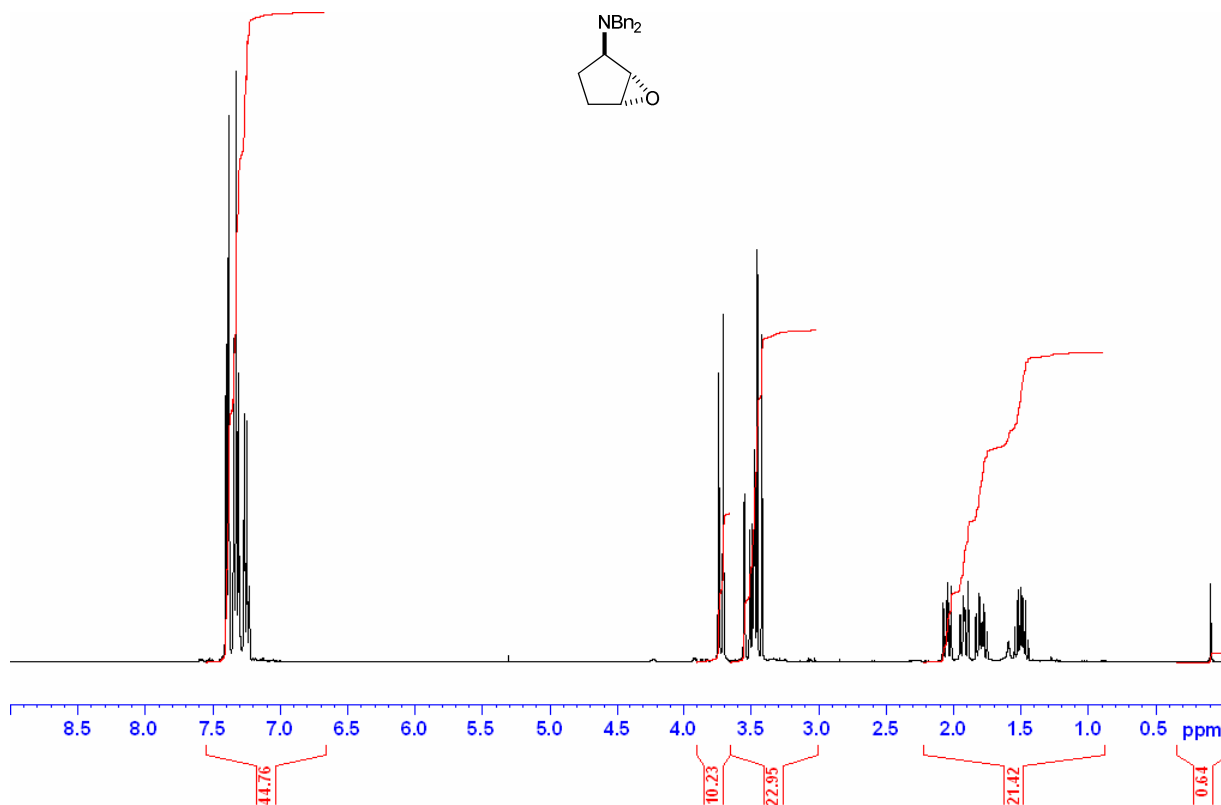

**(1*RS*,2*SR*,3*RS*)-1,2-Epoxy-3-(*N,N*-dibenzylamino)cyclopentane 34 (100 MHz  $^{13}\text{C}$ ,  $\text{CDCl}_3$ )**

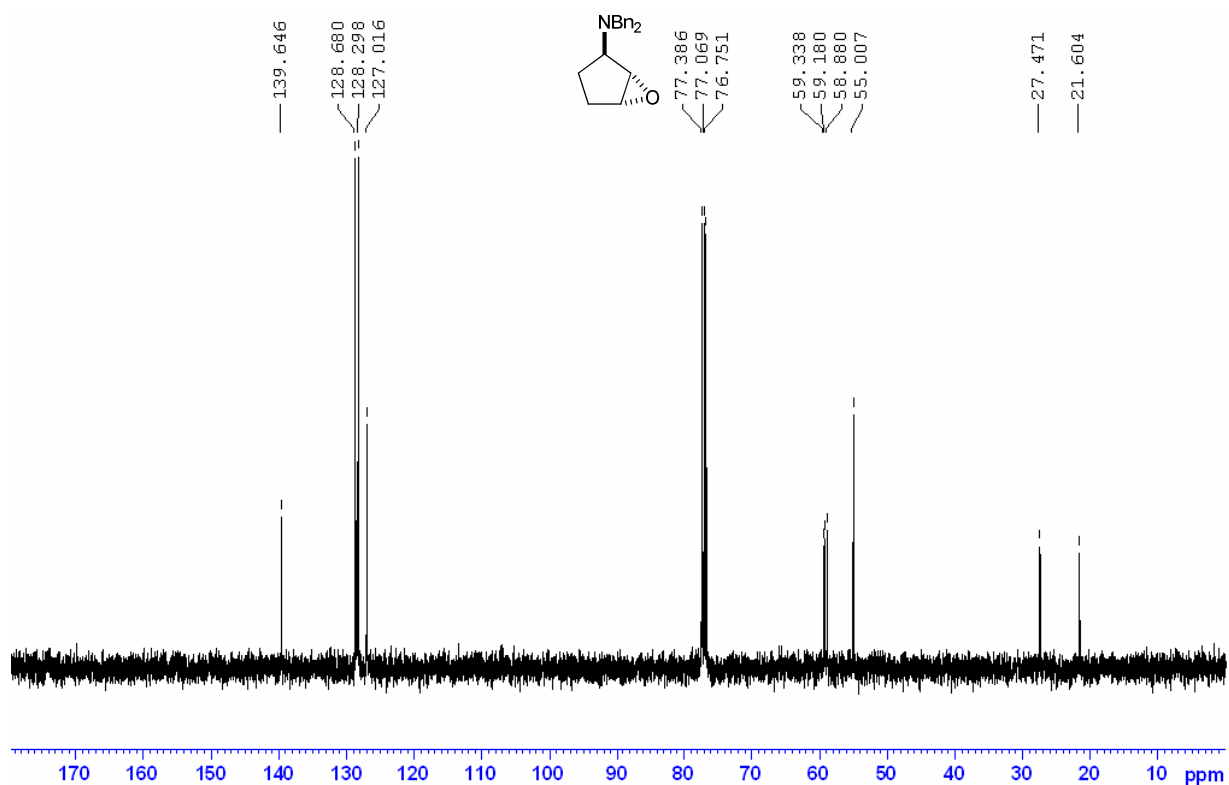

**(1*RS*,2*RS*,3*SR*)-3-(*N,N*-Dibenzylamino)cyclopentane-1,2-diol 35 (400 MHz  $^1\text{H}$ ,  $\text{CDCl}_3$ )**

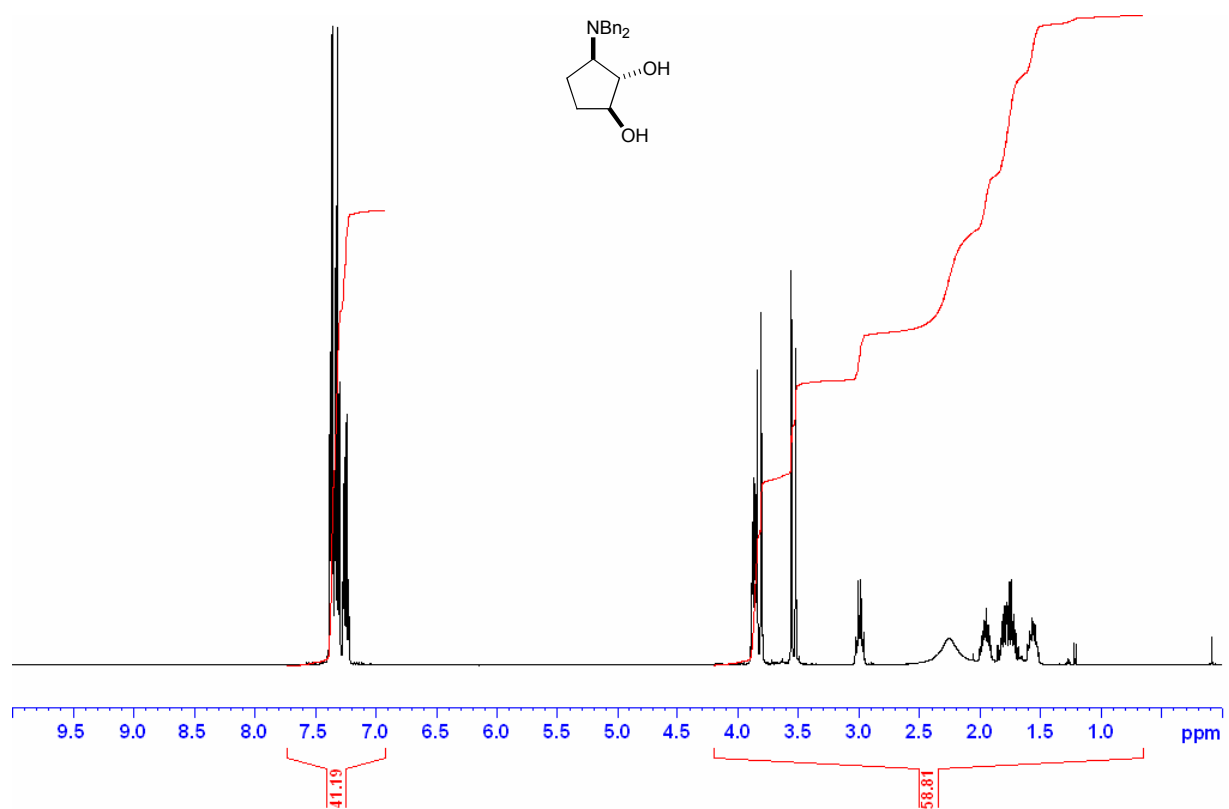

**(1*RS*,2*RS*,3*SR*)-3-(*N,N*-Dibenzylamino)cyclopentane-1,2-diol 35 (100 MHz  $^{13}\text{C}$ ,  $\text{CDCl}_3$ )**

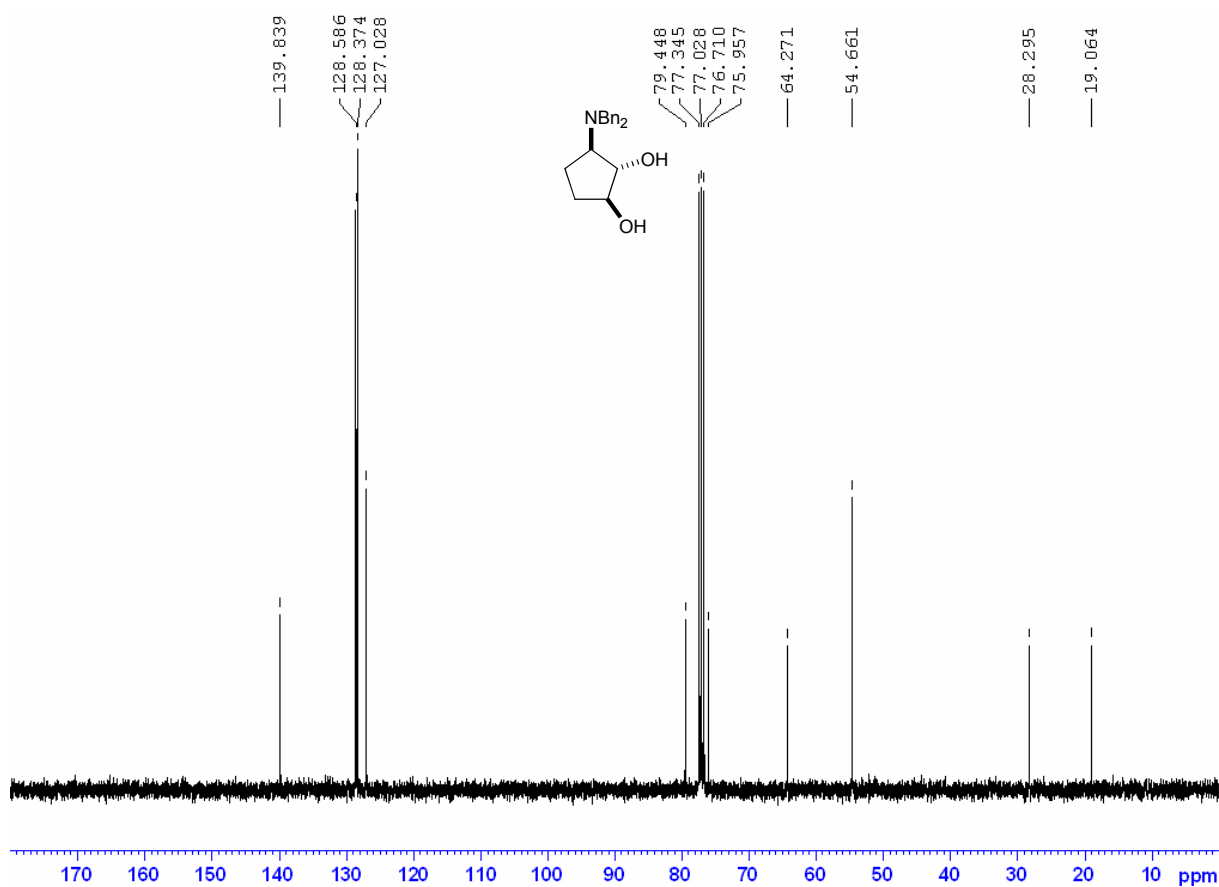

**(1*RS*,2*SR*,3*RS*)-3-(*N,N*-Dibenzylamino)cyclopentane-1,2-diol 39 (400 MHz  $^1\text{H}$ ,  $\text{CDCl}_3$ )**

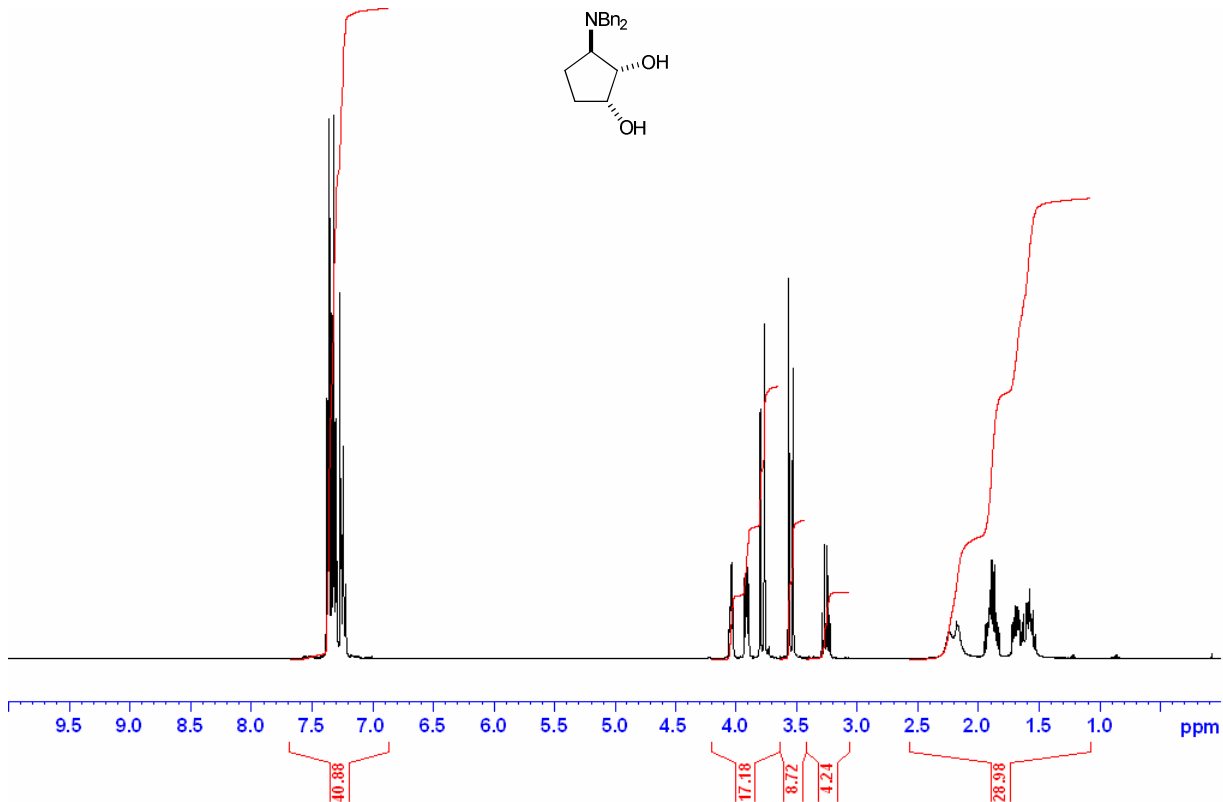

**(1*RS*,2*SR*,3*RS*)-3-(*N,N*-Dibenzylamino)cyclopentane-1,2-diol 39 (100 MHz  $^{13}\text{C}$ ,  $\text{CDCl}_3$ )**

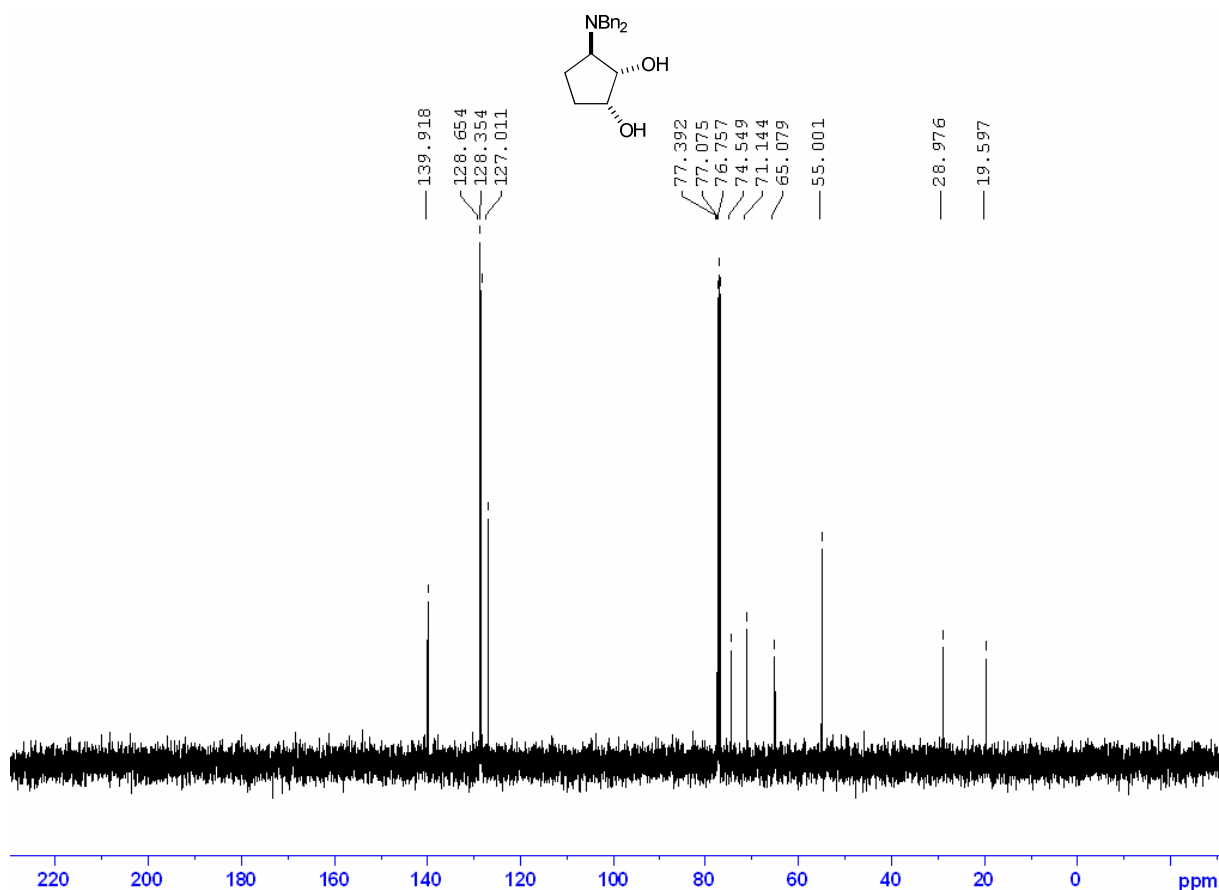

**(1*RS*,2*RS*,3*RS*)-1-*p*-Toluenesulfonyloxy-2-acetoxy-3-(*N,N*-dibenzylamino)cyclopentane 44**

**(400 MHz  $^1\text{H}$ ,  $\text{CDCl}_3$ )**

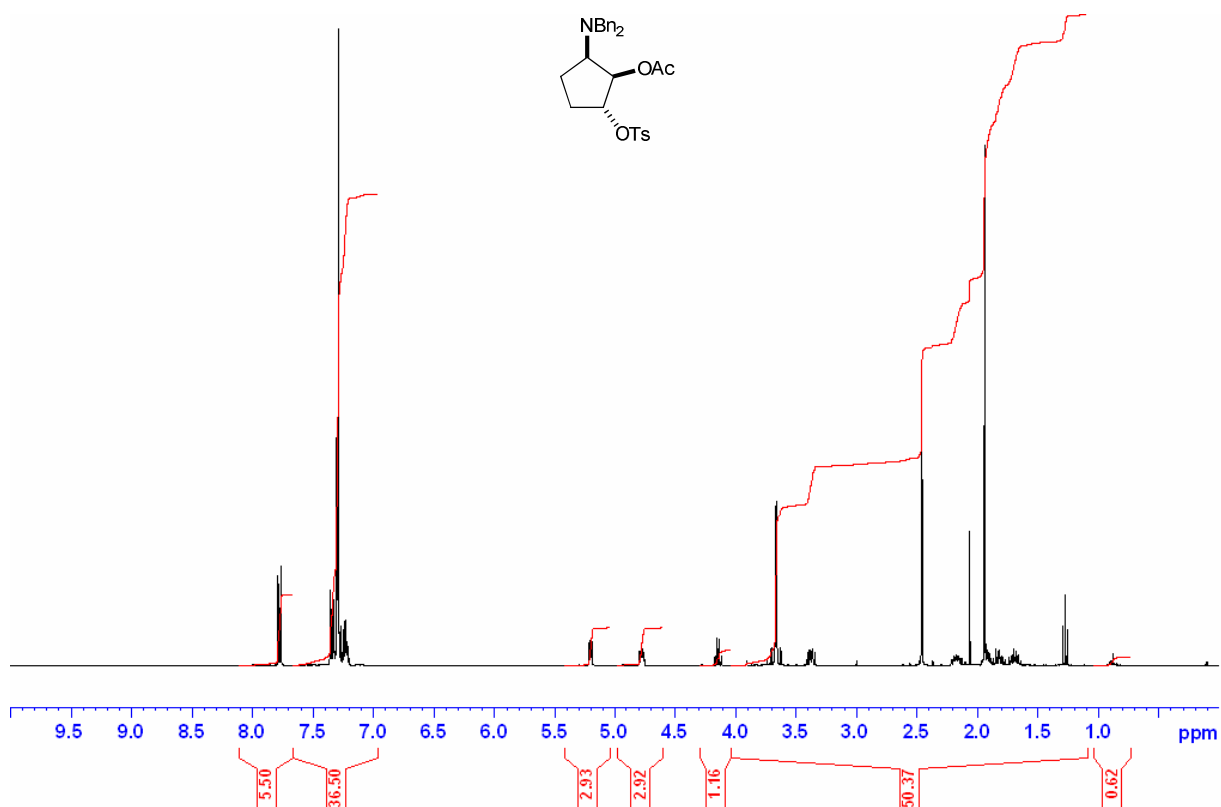

**(1*RS*,2*RS*,3*RS*)-1-*p*-Toluenesulfonyloxy-2-acetoxy-3-(*N,N*-dibenzylamino)cyclopentane 44**

**(100 MHz  $^{13}\text{C}$ ,  $\text{CDCl}_3$ )**

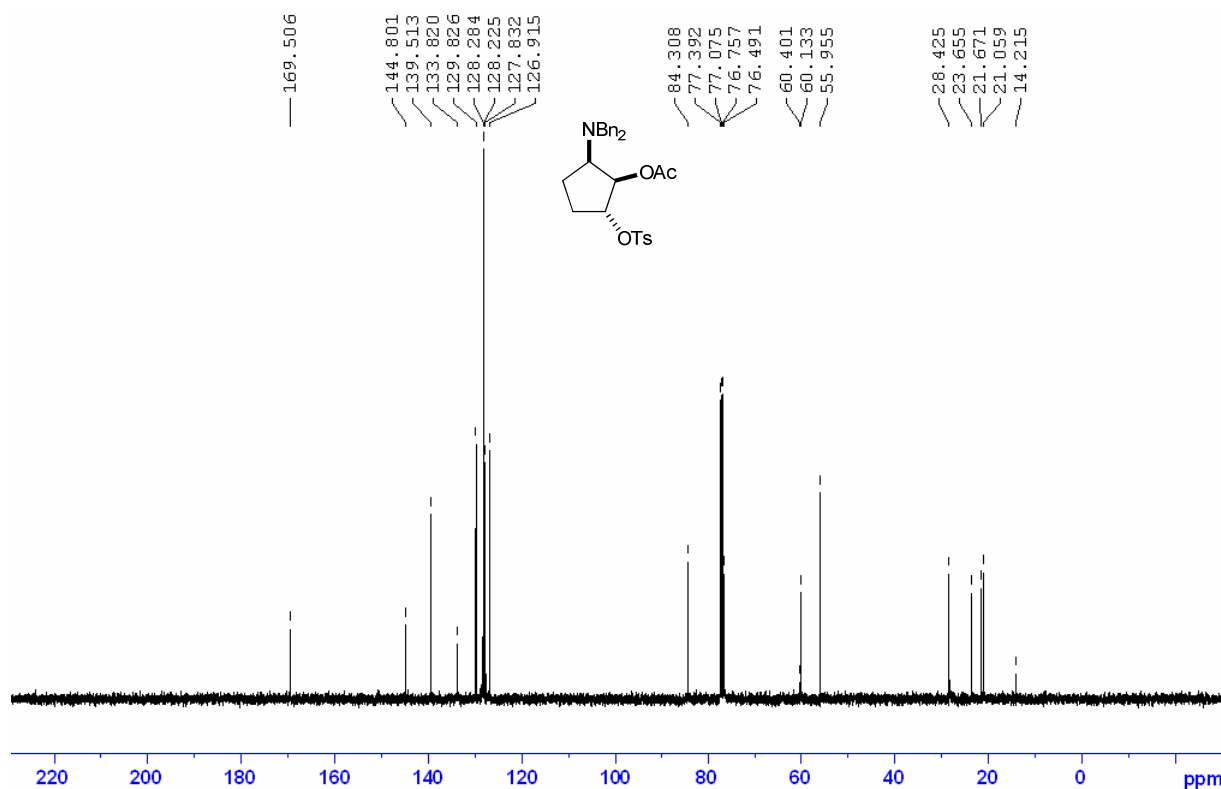

**(1*RS*,2*SR*,3*SR*)-3-(*N,N*-Dibenzylamino)cyclopentane-1,2-diol 47 (400 MHz  $^1\text{H}$ ,  $\text{CDCl}_3$ )**

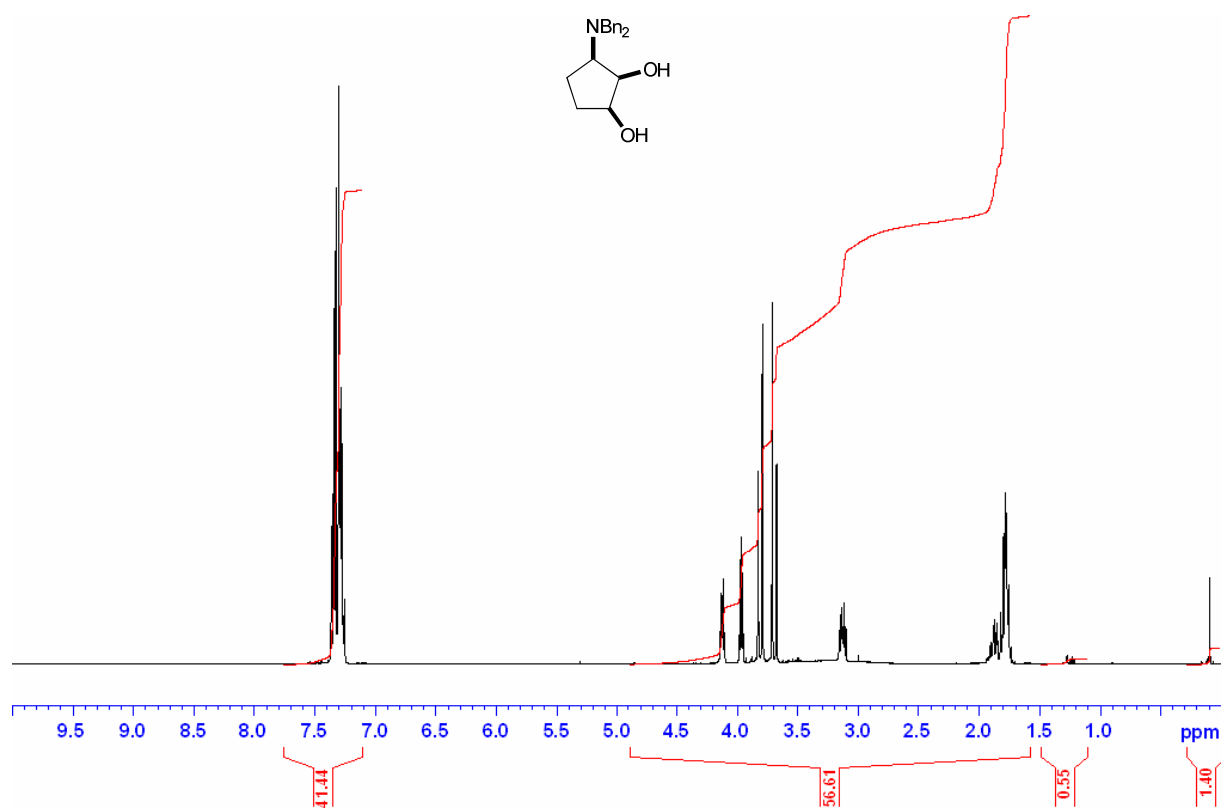

**(1*RS*,2*SR*,3*SR*)-3-(*N,N*-Dibenzylamino)cyclopentane-1,2-diol 47 (100 MHz  $^{13}\text{C}$ ,  $\text{CDCl}_3$ )**

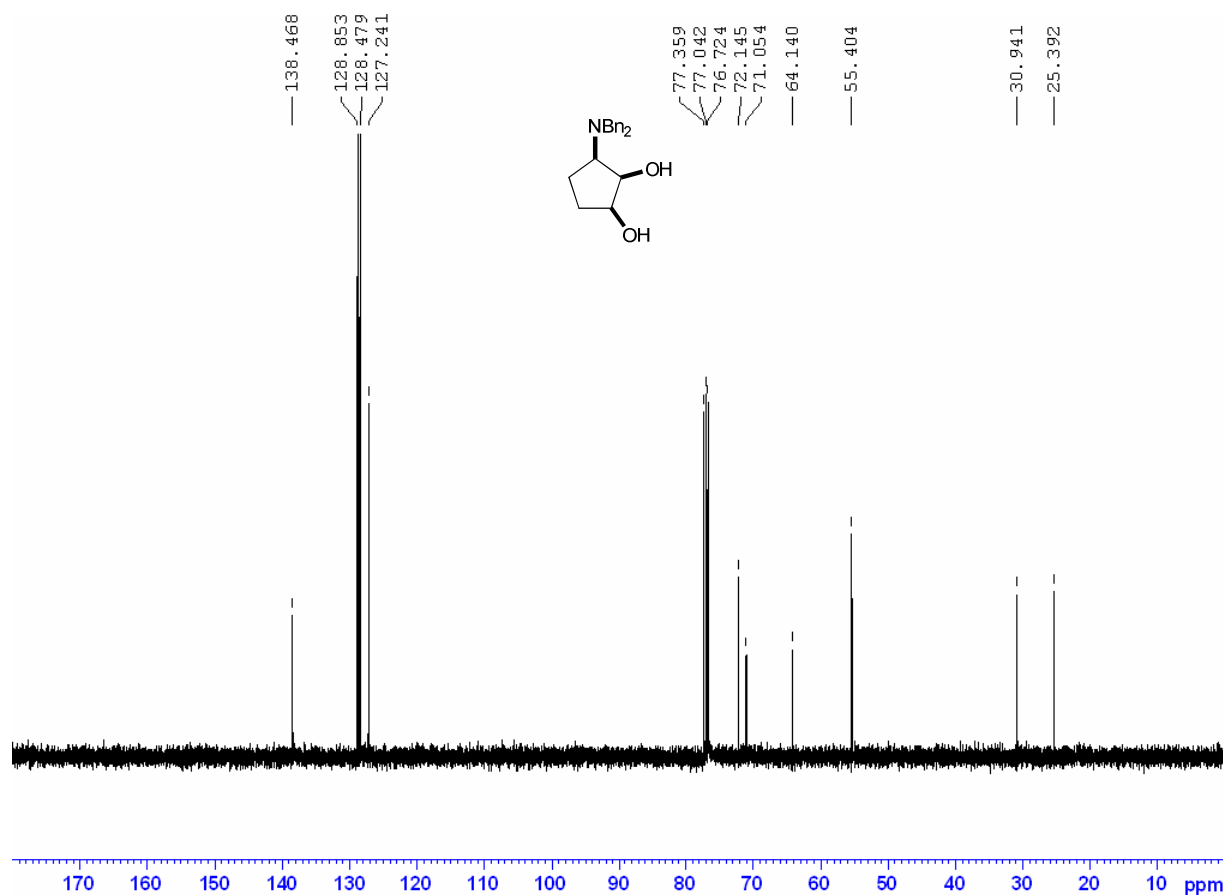

**(1*RS*,2*RS*,3*RS*)-3-Aminocyclopentane-1,2-diol hydrochloride 48 (400 MHz  $^1\text{H}$ ,  $d_6$ -DMSO)**

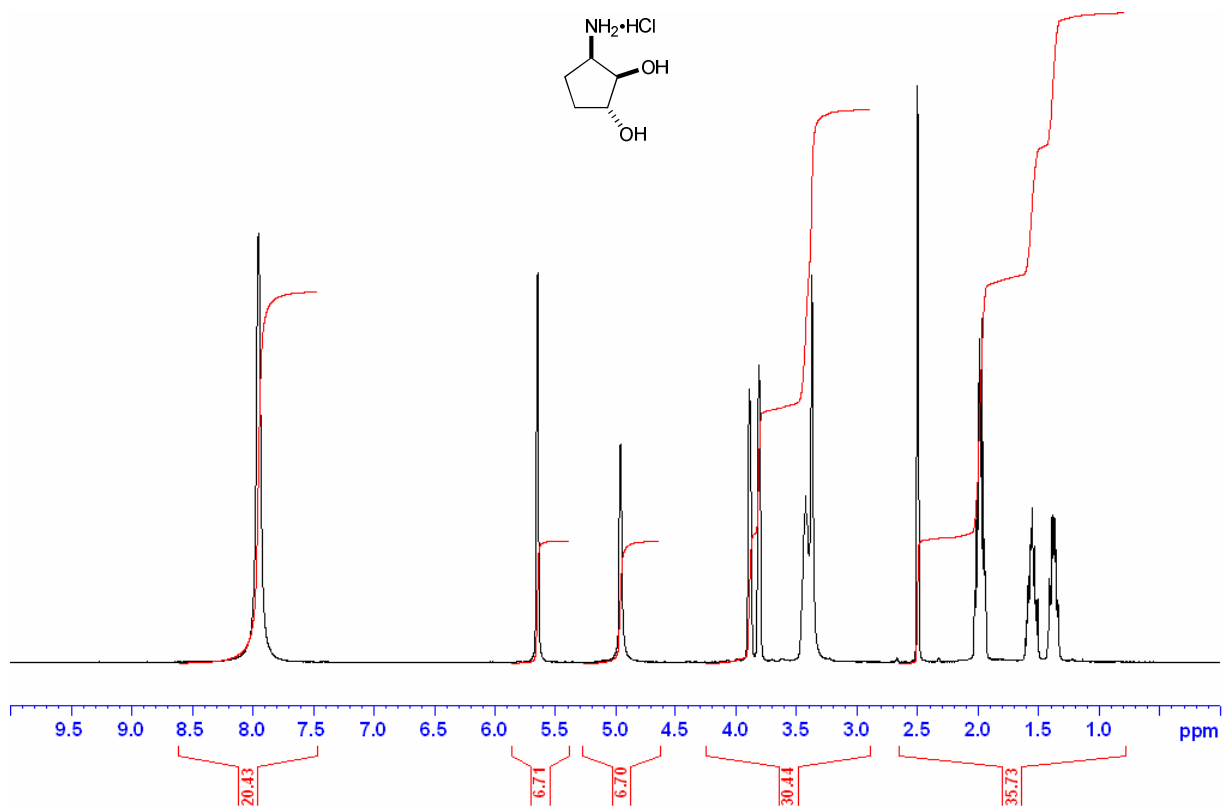



**(1*RS*,2*RS*,3*RS*)-3-Aminocyclopentane-1,2-diol hydrochloride 48 (100 MHz  $^{13}\text{C}$ ,  $\text{CDCl}_3$ )**

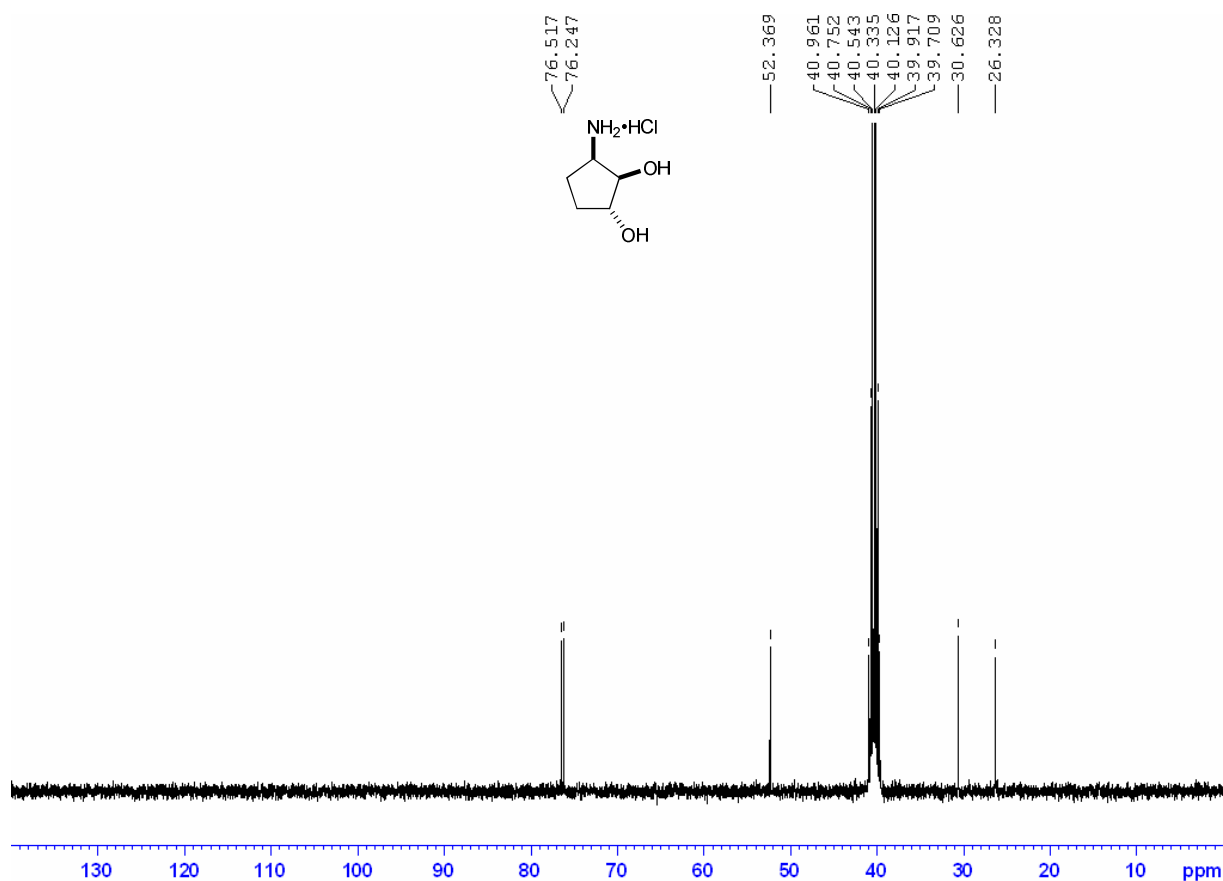

**(1*RS*,2*RS*,3*SR*)-3-Aminocyclopentane-1,2-diol hydrochloride 49 (400 MHz  $^1\text{H}$ ,  $d_6$ -DMSO)**

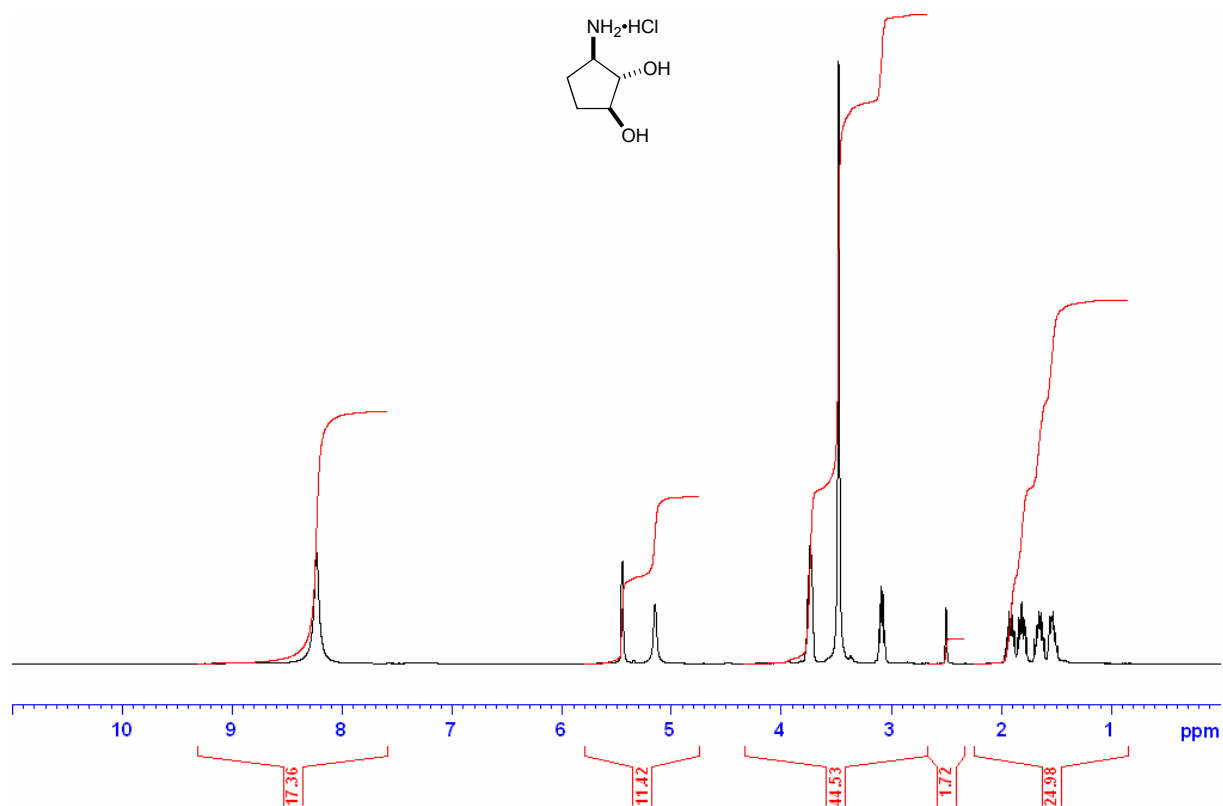

**(1*RS*,2*RS*,3*SR*)-3-Aminocyclopentane-1,2-diol hydrochloride 49 (100 MHz  $^{13}\text{C}$ ,  $\text{CDCl}_3$ )**

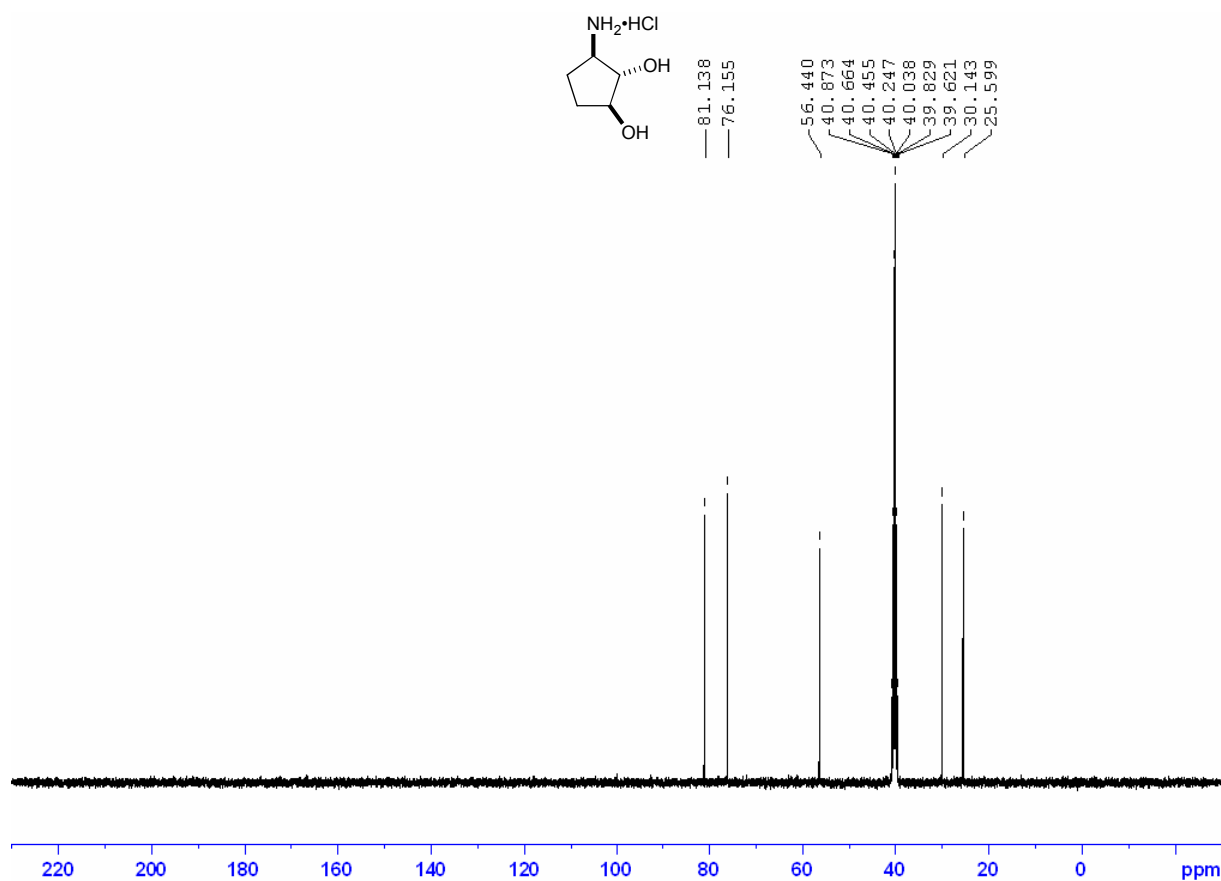

**(1*RS*,2*SR*,3*RS*)-3-Aminocyclopentane-1,2-diol hydrochloride 50 (400 MHz  $^1\text{H}$ ,  $d_6$ -DMSO)**

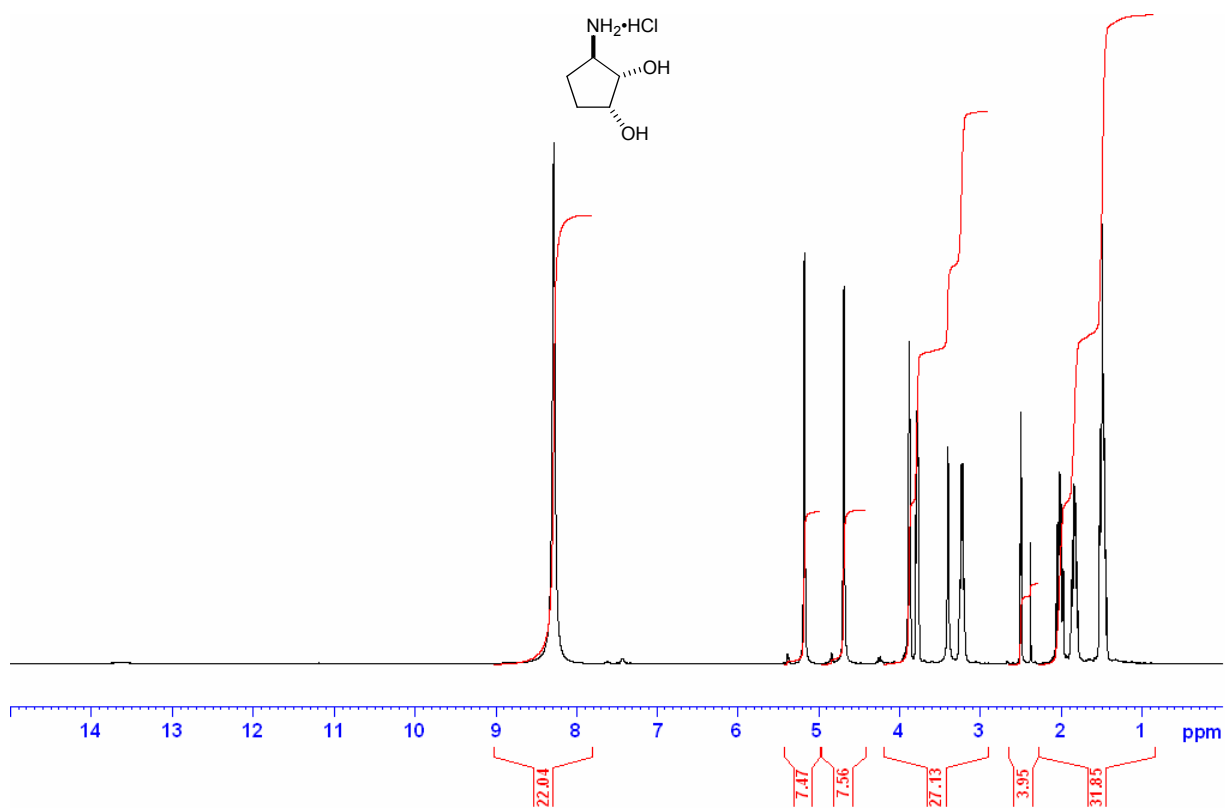

**(1*RS*,2*SR*,3*RS*)-3-Aminocyclopentane-1,2-diol hydrochloride 50 (100 MHz  $^{13}\text{C}$ ,  $\text{CDCl}_3$ )**

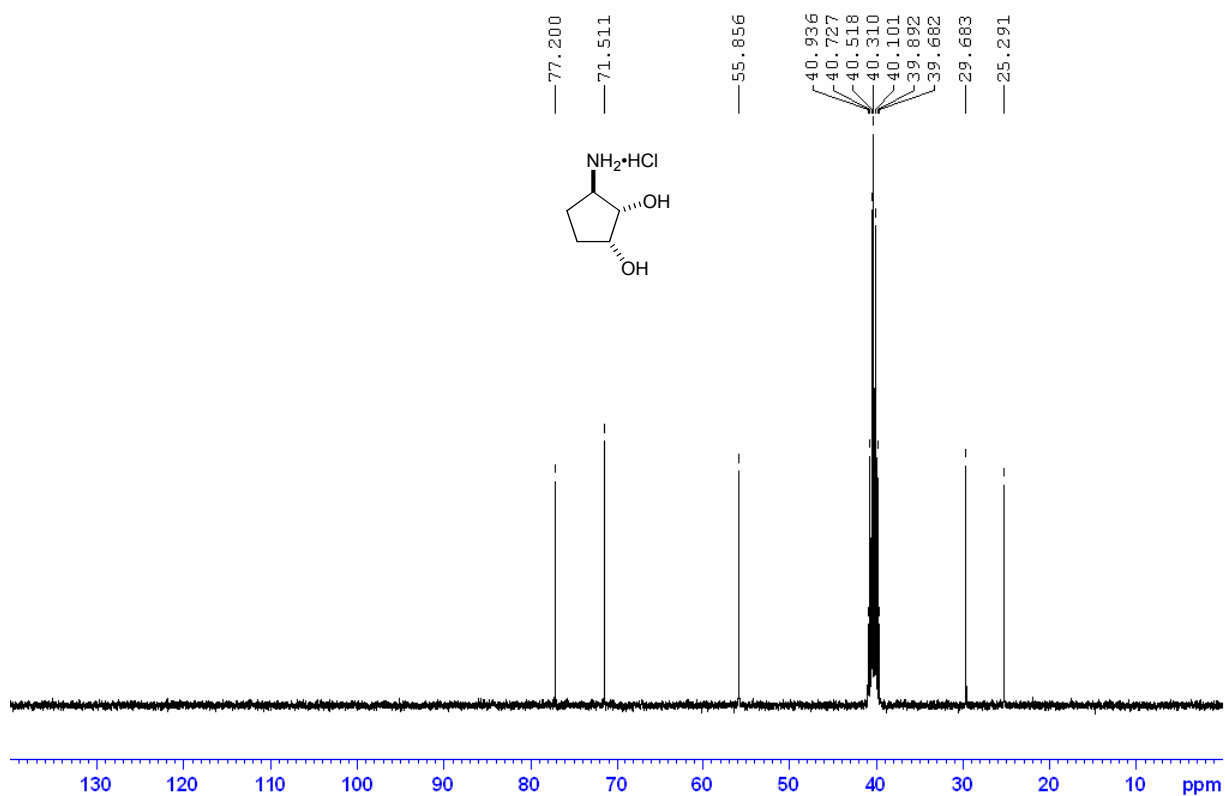

**(1*RS*,2*SR*,3*SR*)-3-Aminocyclopentane-1,2-diol hydrochloride 51 (400 MHz  $^1\text{H}$ ,  $d_6$ -DMSO)**

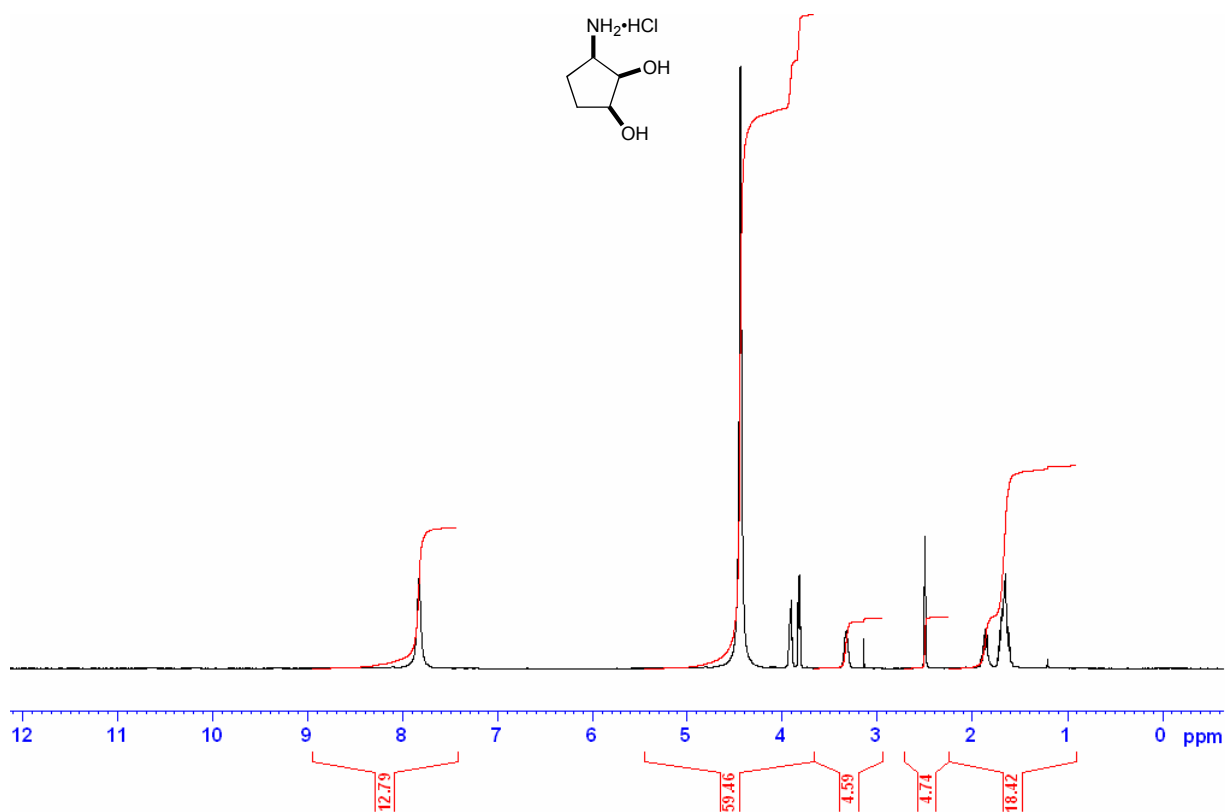

**(1*RS*,2*SR*,3*SR*)-3-Aminocyclopentane-1,2-diol hydrochloride 51 (100 MHz  $^{13}\text{C}$ ,  $\text{CDCl}_3$ )**

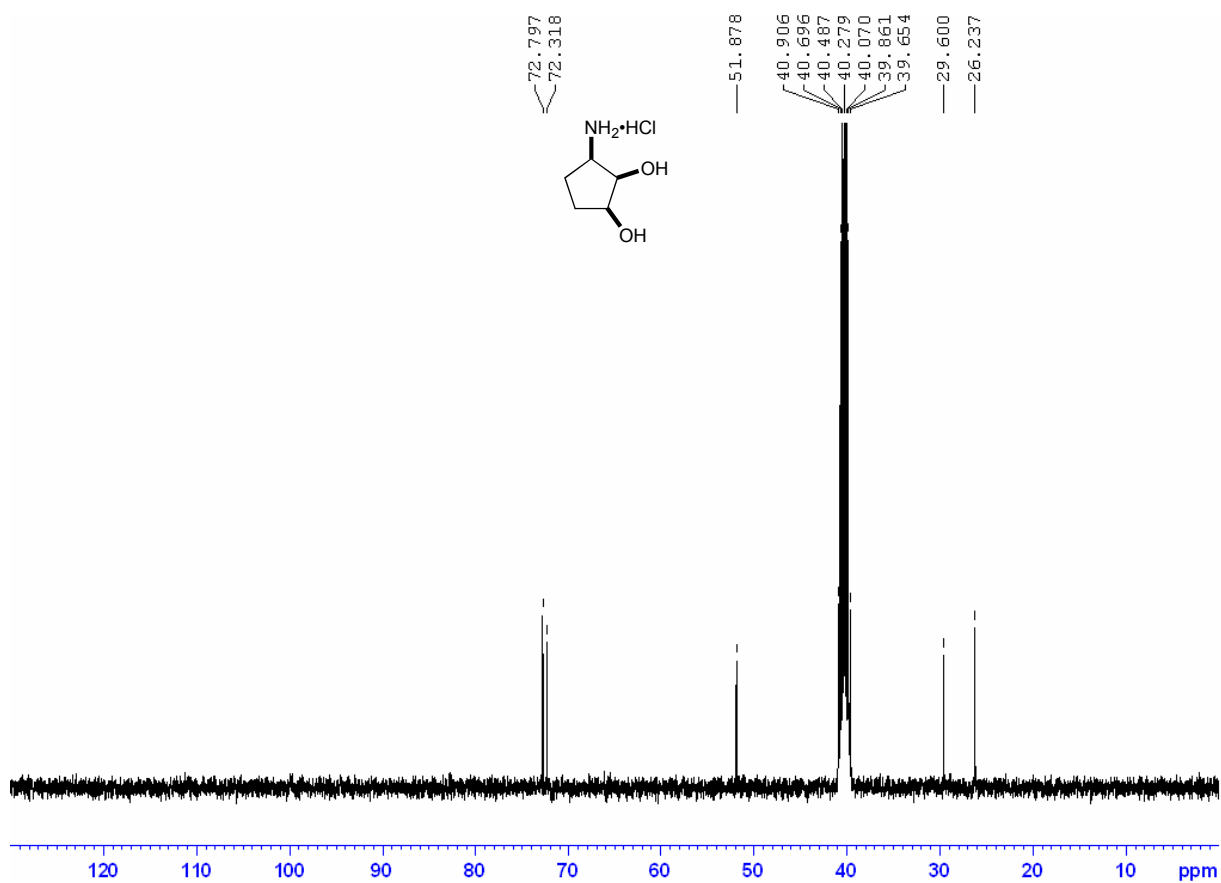

**(1*RS*,2*RS*,3*SR*)-1-*p*-Toluenesulfonyloxy-2-hydroxy-3-(*N,N*-dibenzylamino)cycloheptane 52**

**(400 MHz  $^1\text{H}$ ,  $\text{CDCl}_3$ )**

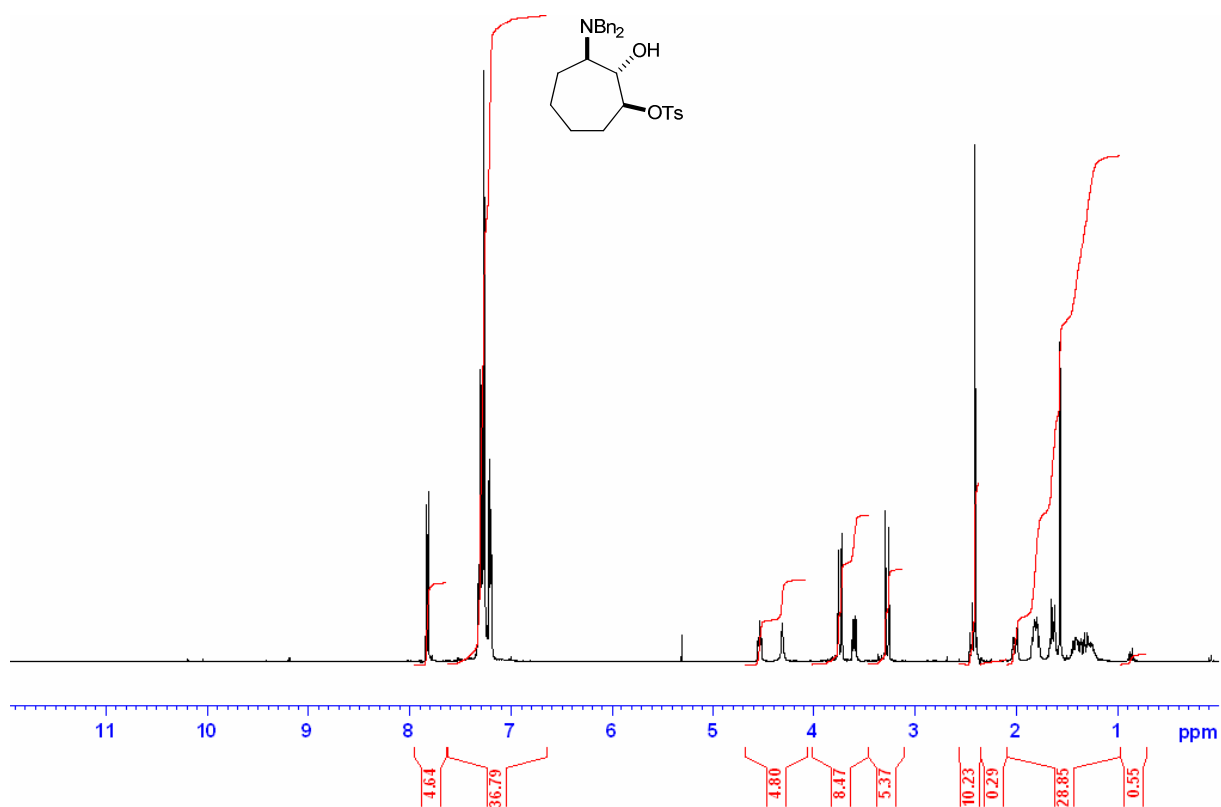

(100 MHz  $^{13}\text{C}$ ,  $\text{CDCl}_3$ )

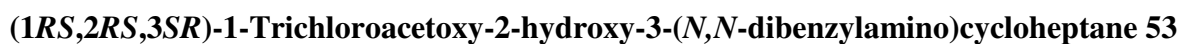

(400 MHz  $^1\text{H}$ ,  $\text{CDCl}_3$ )

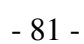

**(1*RS*,2*RS*,3*SR*)-1-Trichloroacetoxy-2-hydroxy-3-(*N,N*-dibenzylamino)cycloheptane 53**

**(100 MHz  $^{13}\text{C}$ ,  $\text{CDCl}_3$ )**

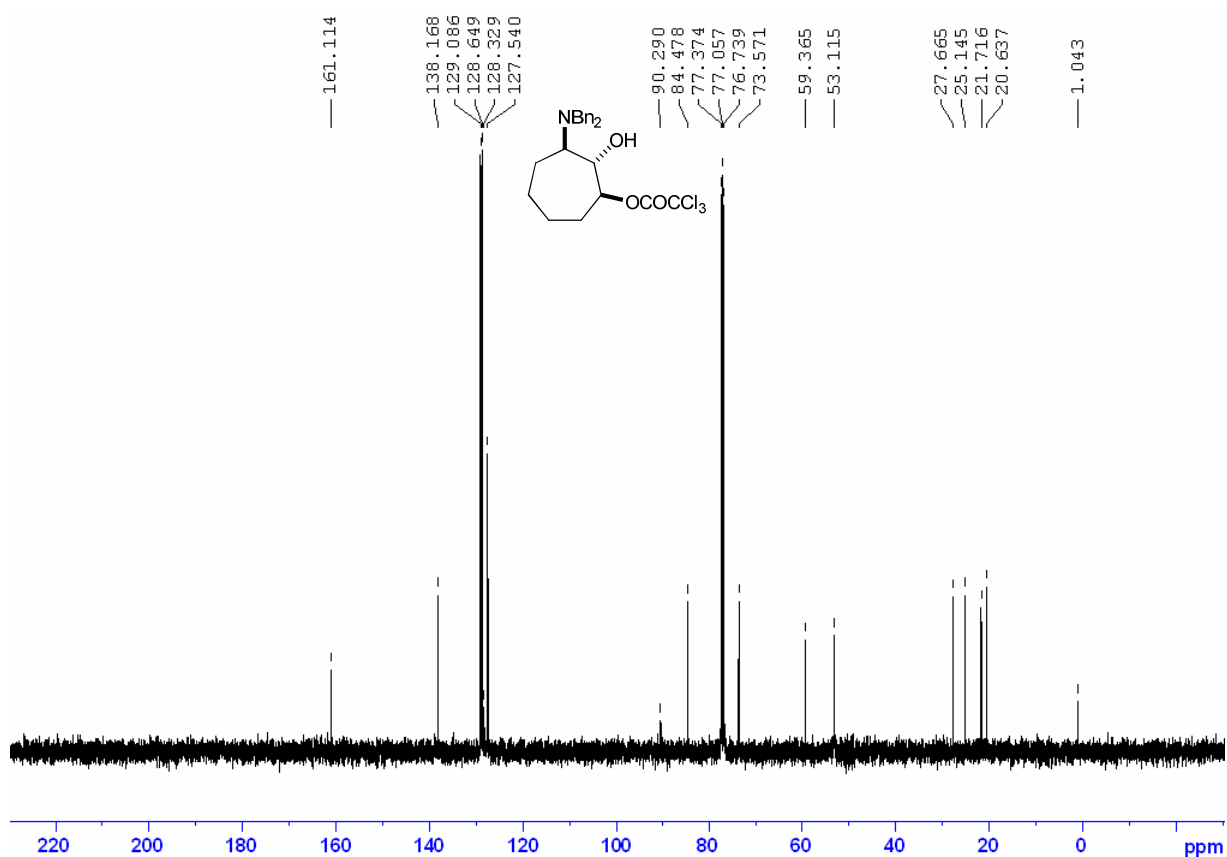

**(1*RS*,2*RS*,3*SR*)-3-(*N,N*-Dibenzylamino)cycloheptane-1,2-diol 54 (400 MHz  $^1\text{H}$ ,  $\text{CDCl}_3$ )**

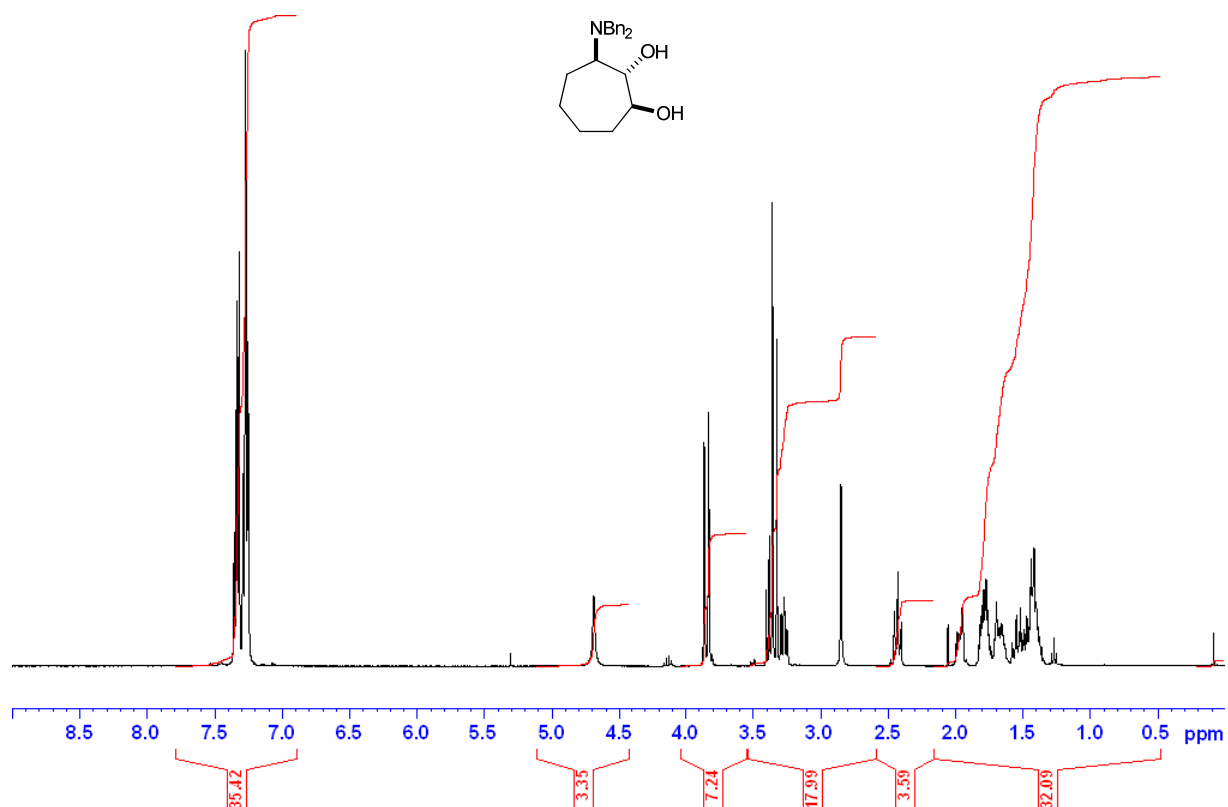

**(1*RS*,2*RS*,3*SR*)-3-(*N,N*-Dibenzylamino)cycloheptane-1,2-diol **54** (100 MHz  $^{13}\text{C}$ ,  $\text{CDCl}_3$ )**

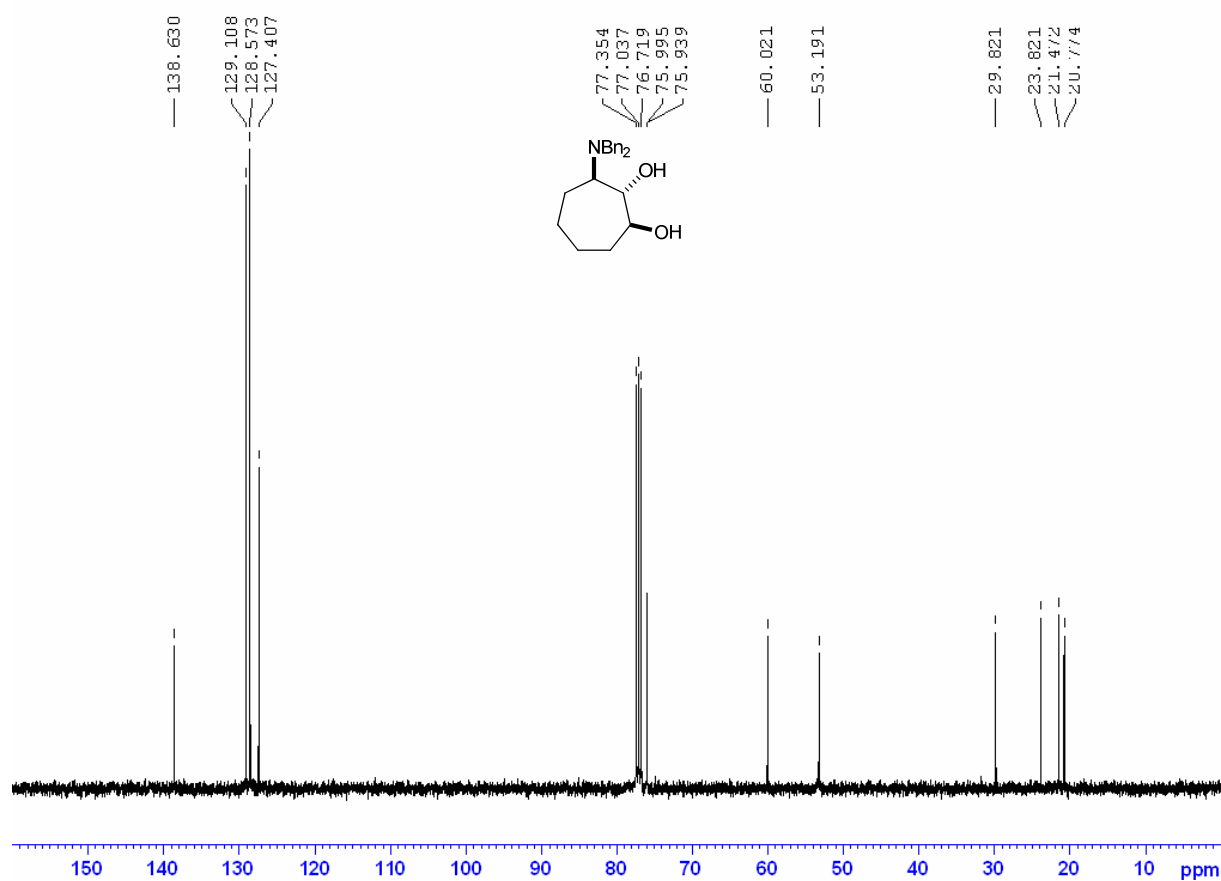

**(1*RS*,2*RS*,3*SR*)-1-*p*-Toluenesulfonyloxy-2-acetoxy-3-(*N,N*-dibenzylamino)cycloheptane **55****

**(400 MHz  $^1\text{H}$ ,  $\text{CDCl}_3$ )**

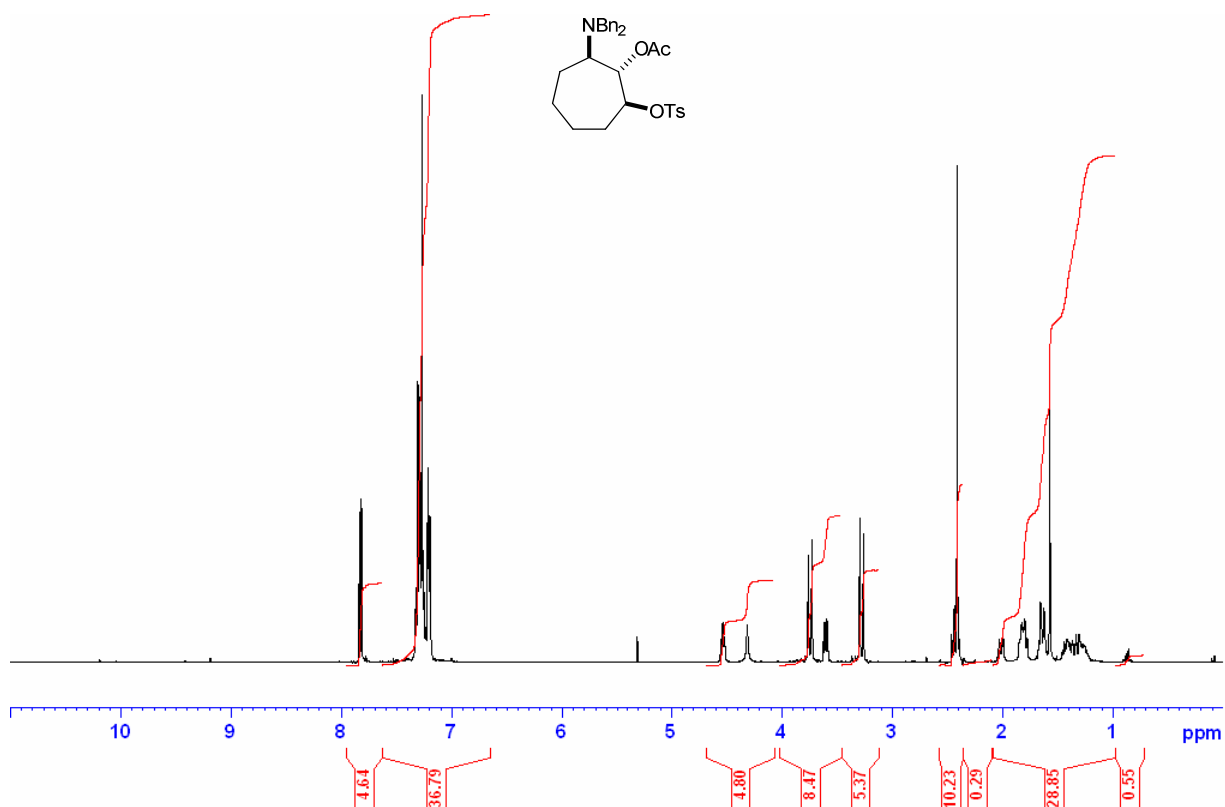

**(1*RS*,2*RS*,3*SR*)-1-*p*-Toluenesulfonyloxy-2-acetoxy-3-(*N,N*-dibenzylamino)cycloheptane 55**

**(100 MHz  $^{13}\text{C}$ ,  $\text{CDCl}_3$ )**

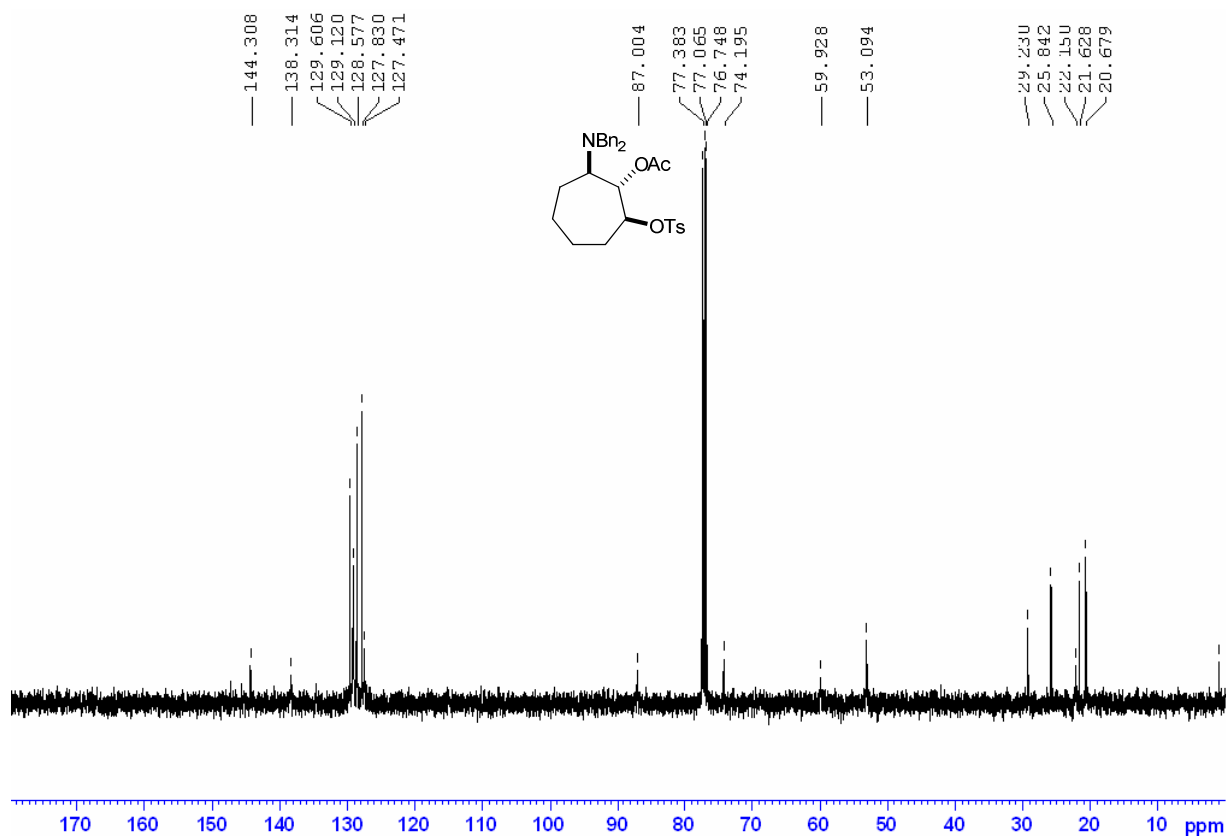

**(1*RS*,2*SR*,3*RS*)-3-(*N,N*-Dibenzylamino)cycloheptane-1,2-diol 58 (400 MHz  $^1\text{H}$ ,  $\text{CDCl}_3$ )**

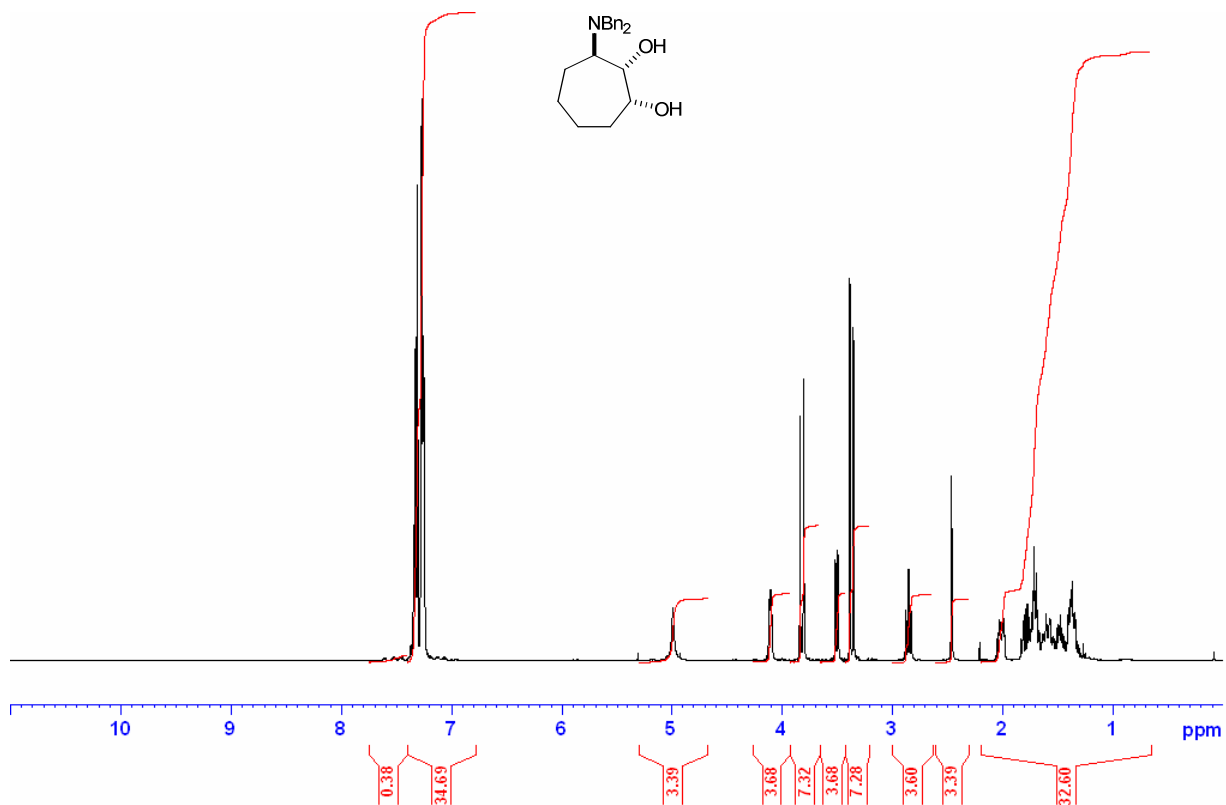



**(1*RS*,2*SR*,3*RS*)-3-(*N,N*-Dibenzylamino)cycloheptane-1,2-diol 58 (100 MHz  $^{13}\text{C}$ ,  $\text{CDCl}_3$ )**

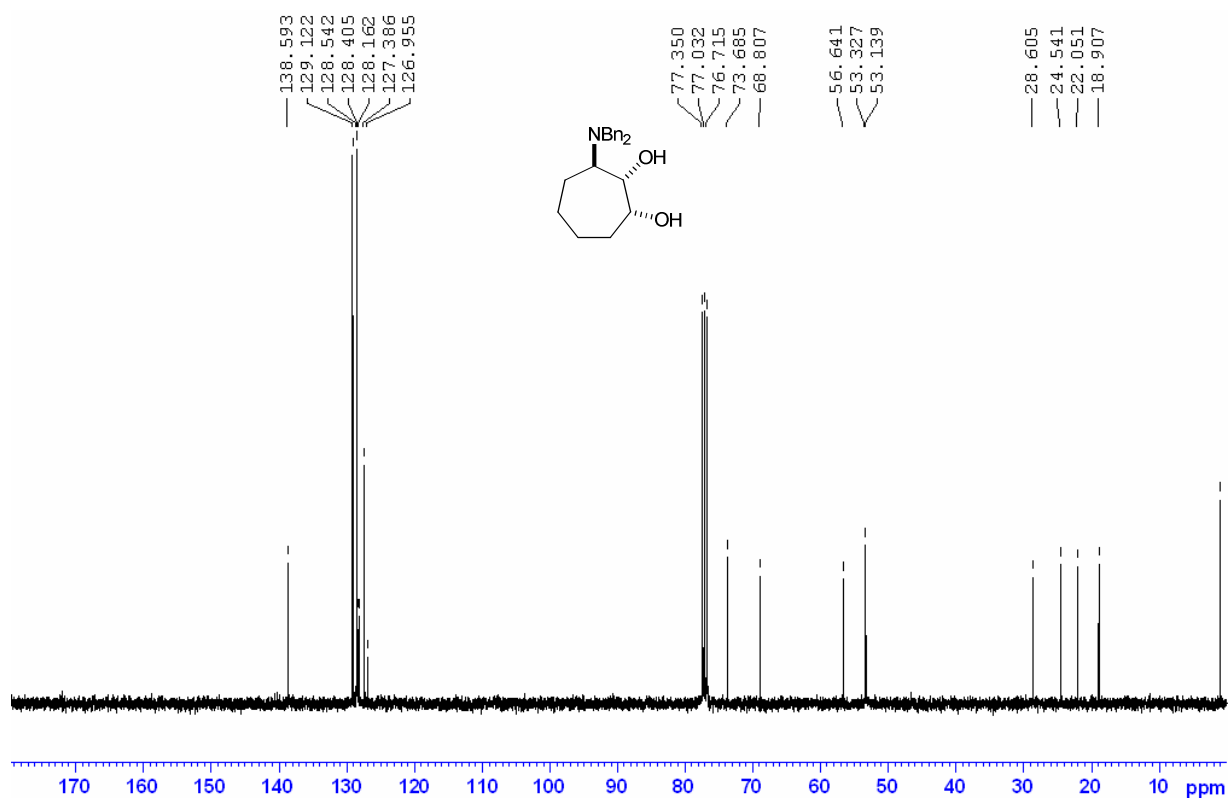

**(1*RS*,2*RS*,3*SR*)-3-Aminocycloheptane-1,2-diol hydrochloride 59 (400 MHz  $^1\text{H}$ ,  $d_6$ -DMSO)**

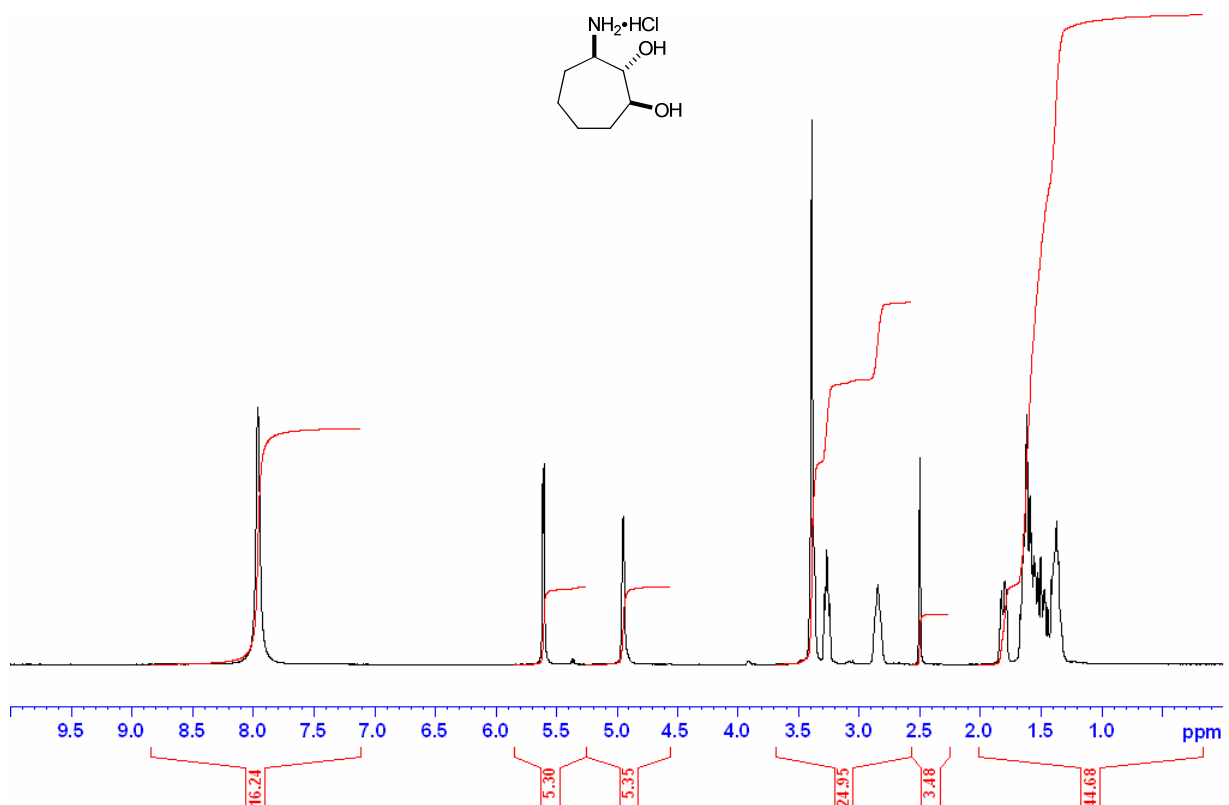

**(1*RS*,2*RS*,3*SR*)-3-Aminocycloheptane-1,2-diol hydrochloride 59 (100 MHz  $^{13}\text{C}$ ,  $\text{CDCl}_3$ )**

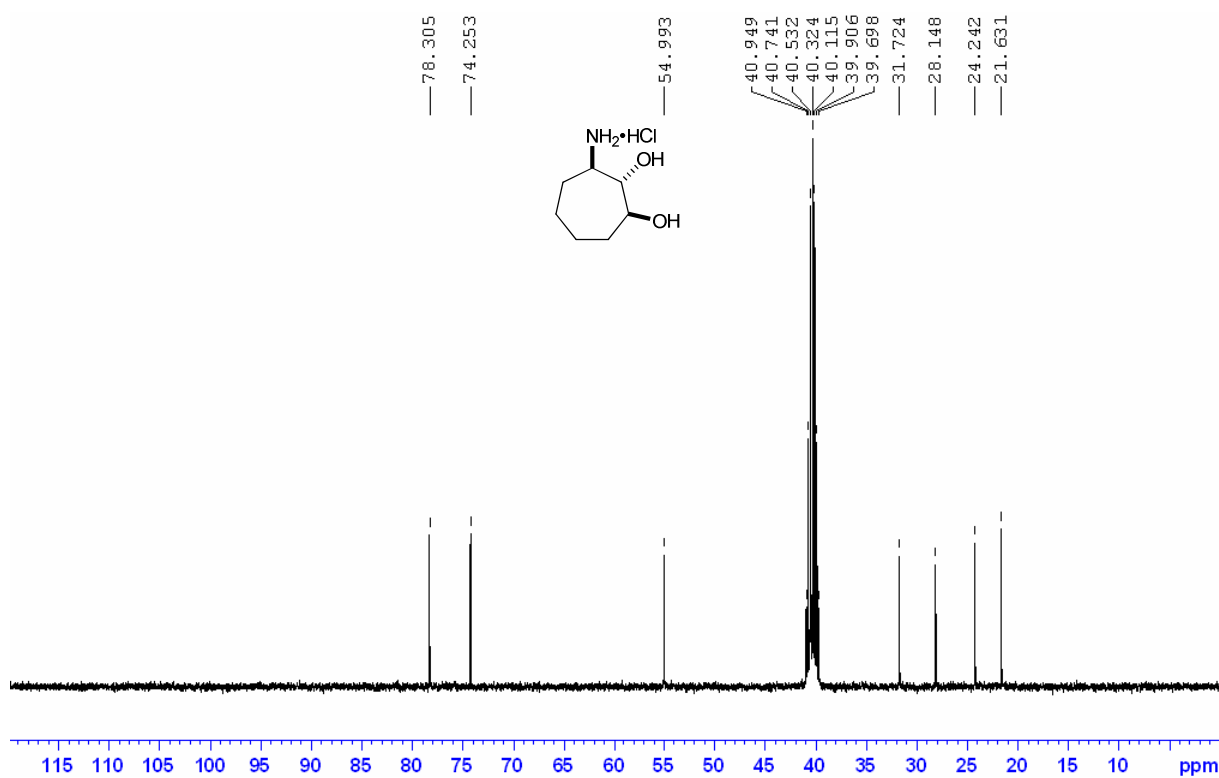

**(1*RS*,2*SR*,3*RS*)-3-Aminocycloheptane-1,2-diol hydrochloride 60 (400 MHz  $^1\text{H}$ ,  $d_6$ -DMSO)**

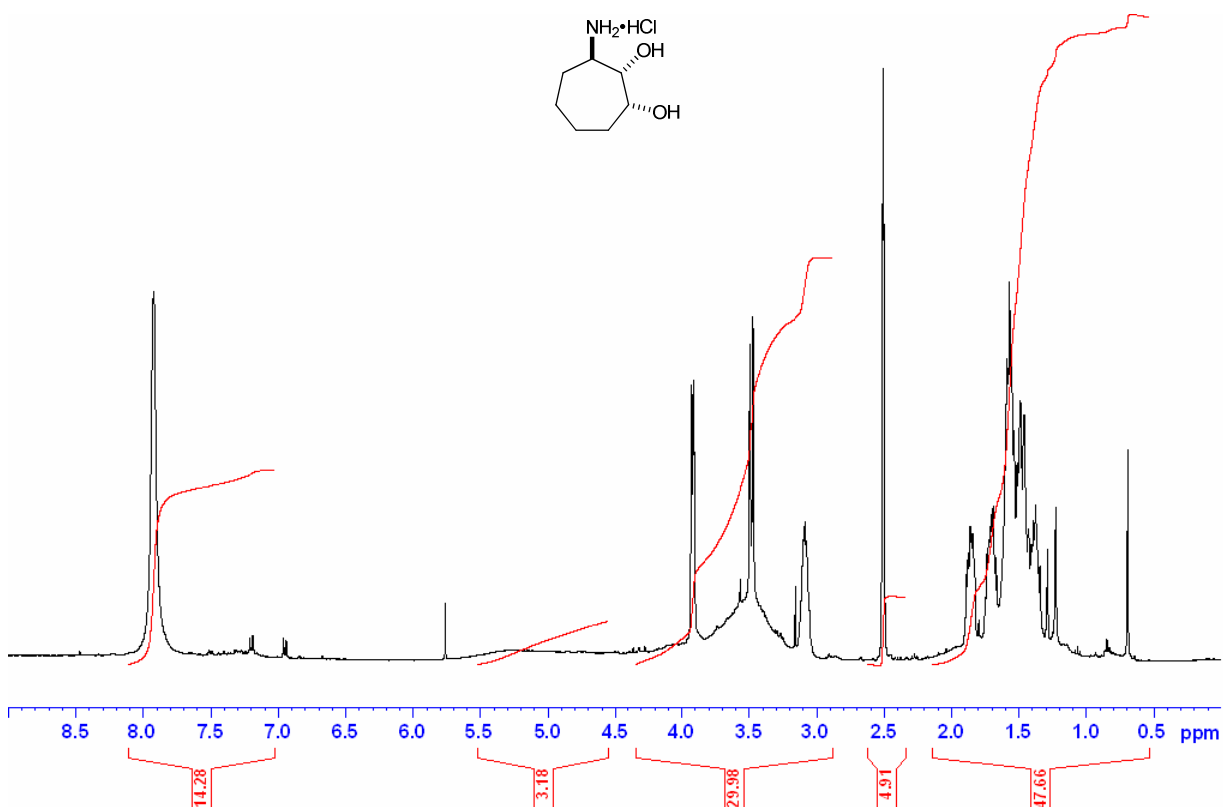

**(1*RS*,2*SR*,3*RS*)-3-Aminocycloheptane-1,2-diol hydrochloride 60 (100 MHz  $^{13}\text{C}$ ,  $\text{CDCl}_3$ )**

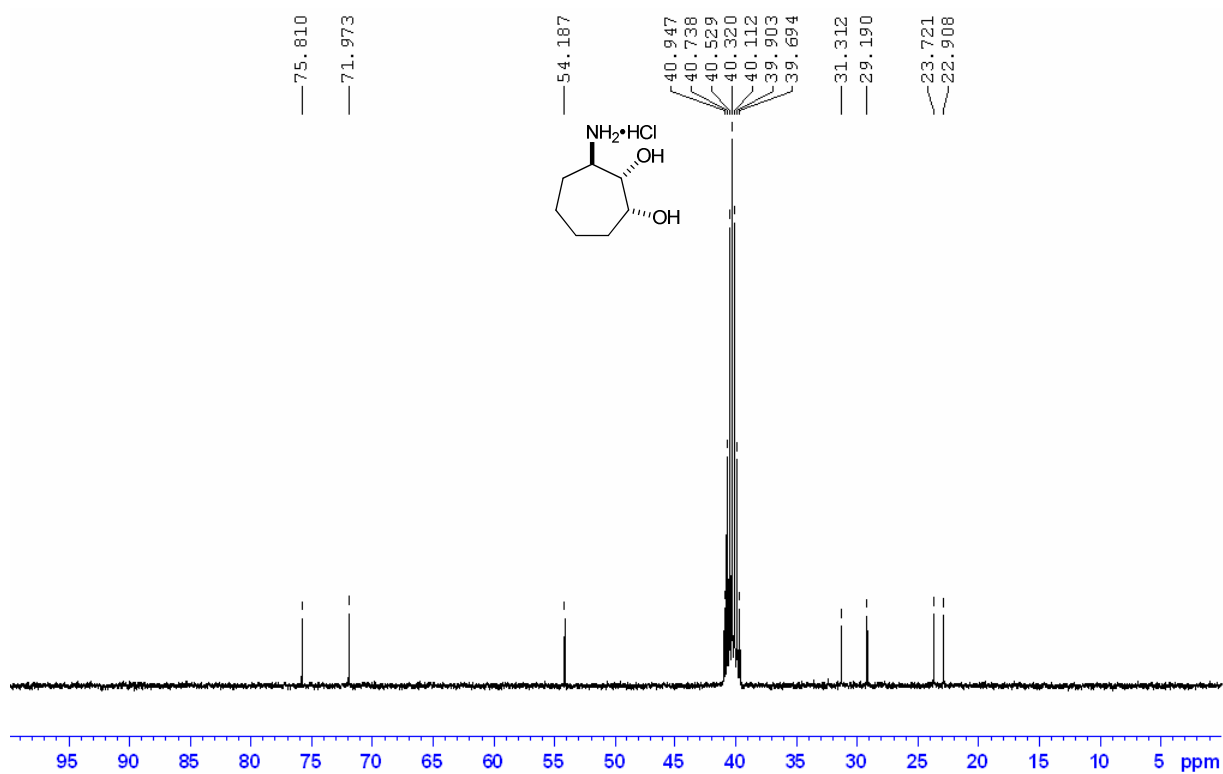

**(*RS*)-3-(Hydroxymethyl)cyclohex-1-ene 62 (400 MHz  $^1\text{H}$ ,  $\text{CDCl}_3$ )**

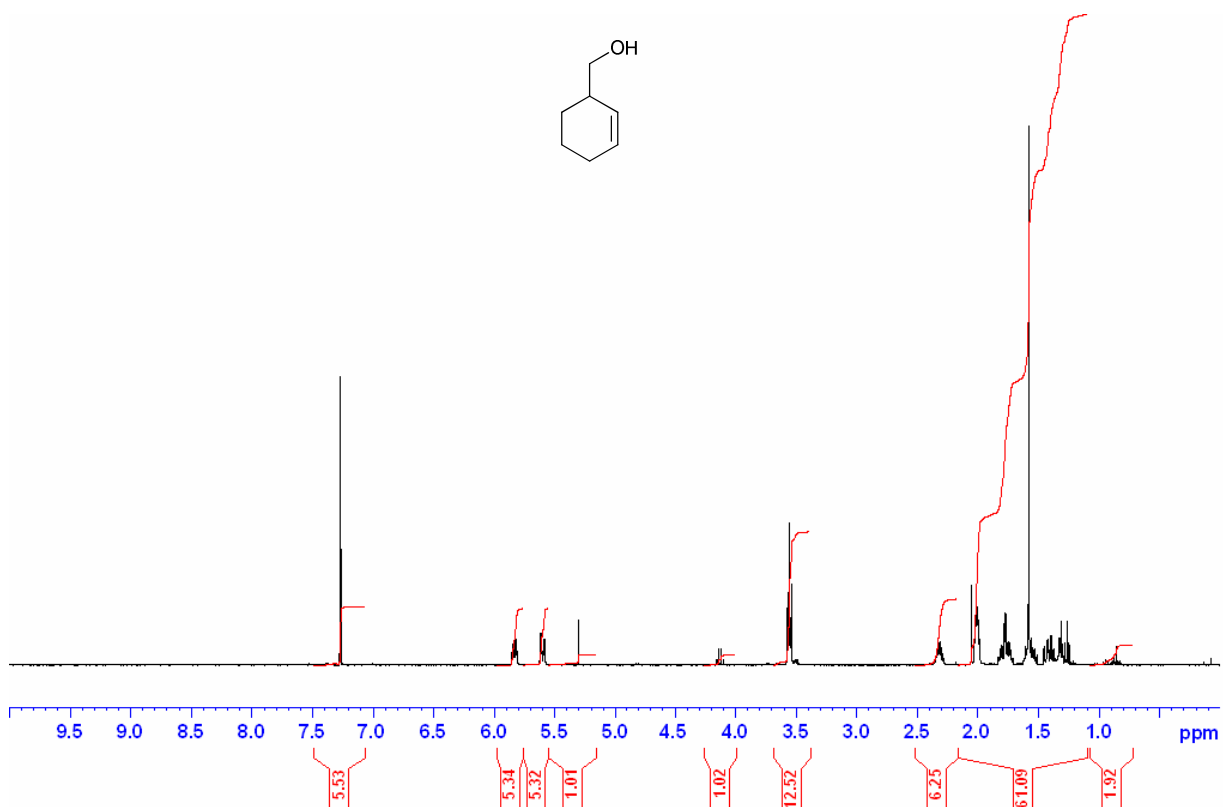

**(*RS*)-3-(Bromomethyl)cyclohex-1-ene 63 (400 MHz  $^1\text{H}$ ,  $\text{CDCl}_3$ )**

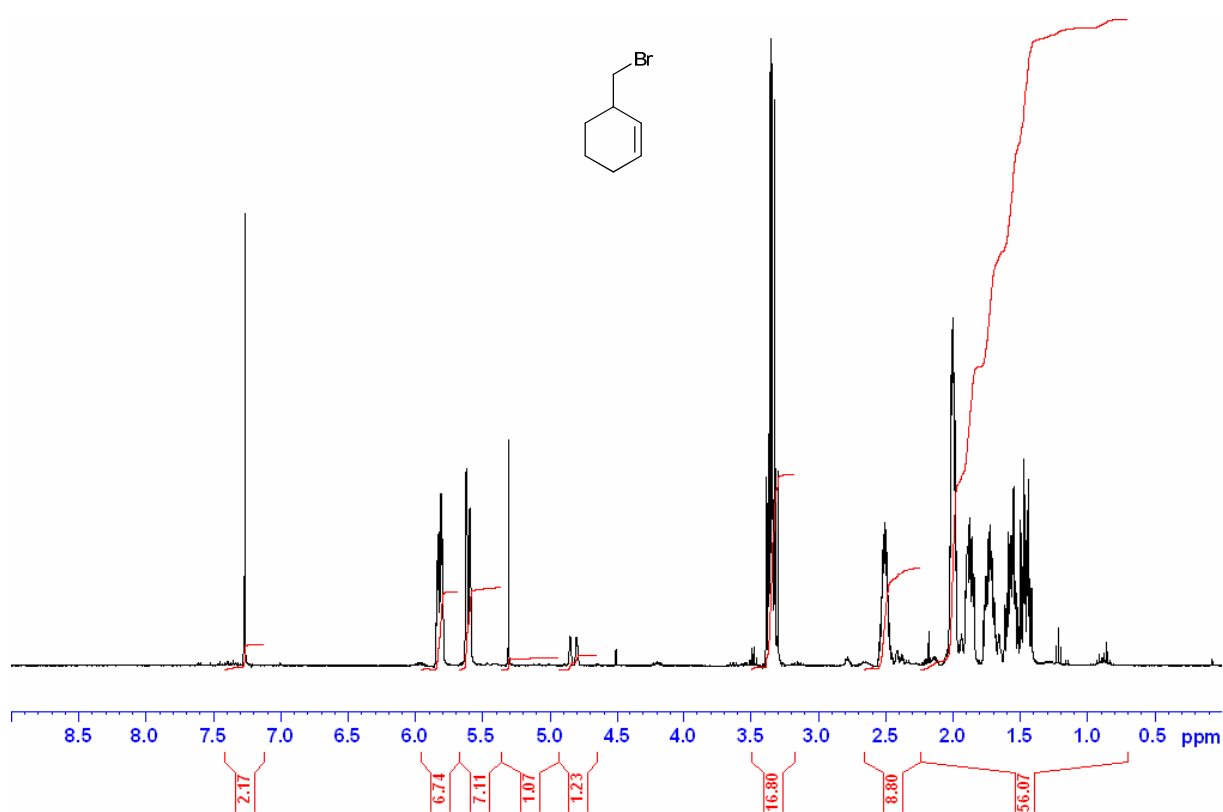

**(*RS*)-3-(*N*-Benzylamino)methyl-cyclohex-1-ene 64 (400 MHz  $^1\text{H}$ ,  $\text{CDCl}_3$ )**

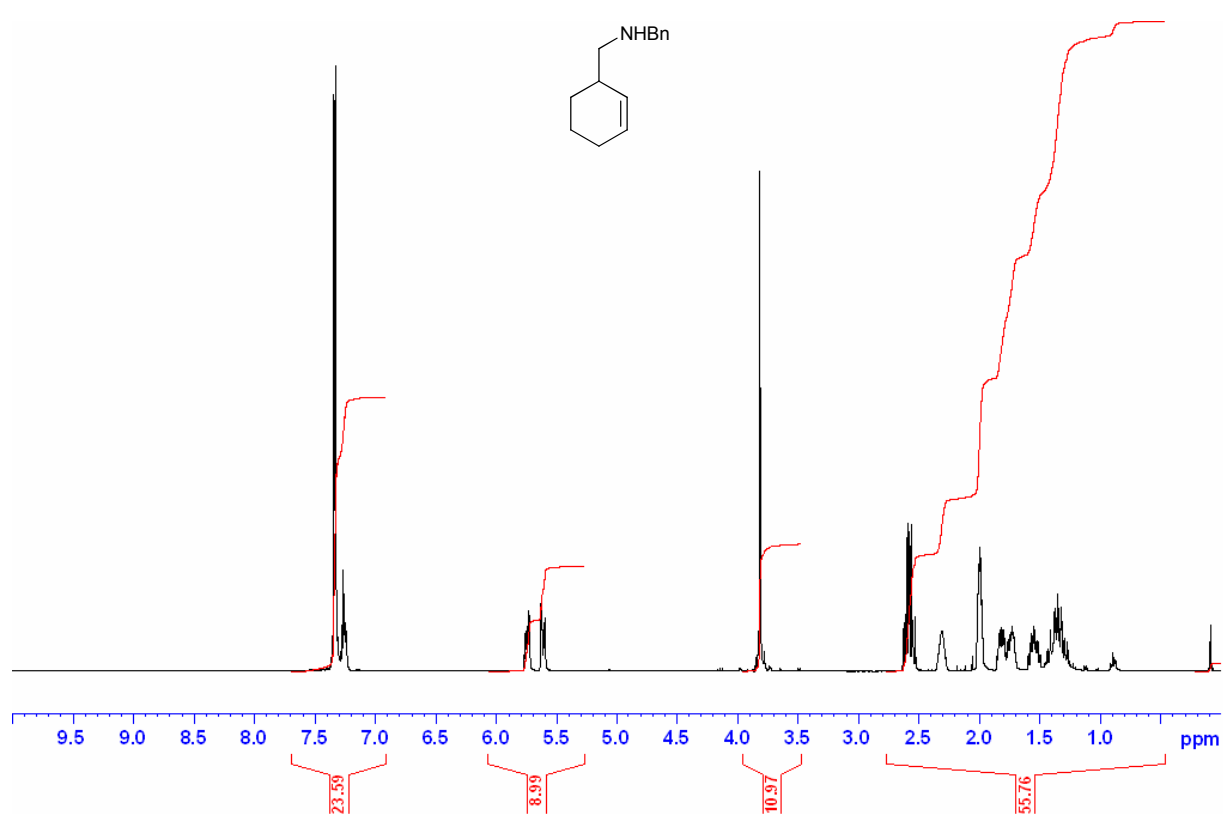

**(*RS*)-3-(*N,N*-Dibenzylamino)methyl-cyclohex-1-ene 65 (400 MHz  $^1\text{H}$ ,  $\text{CDCl}_3$ )**

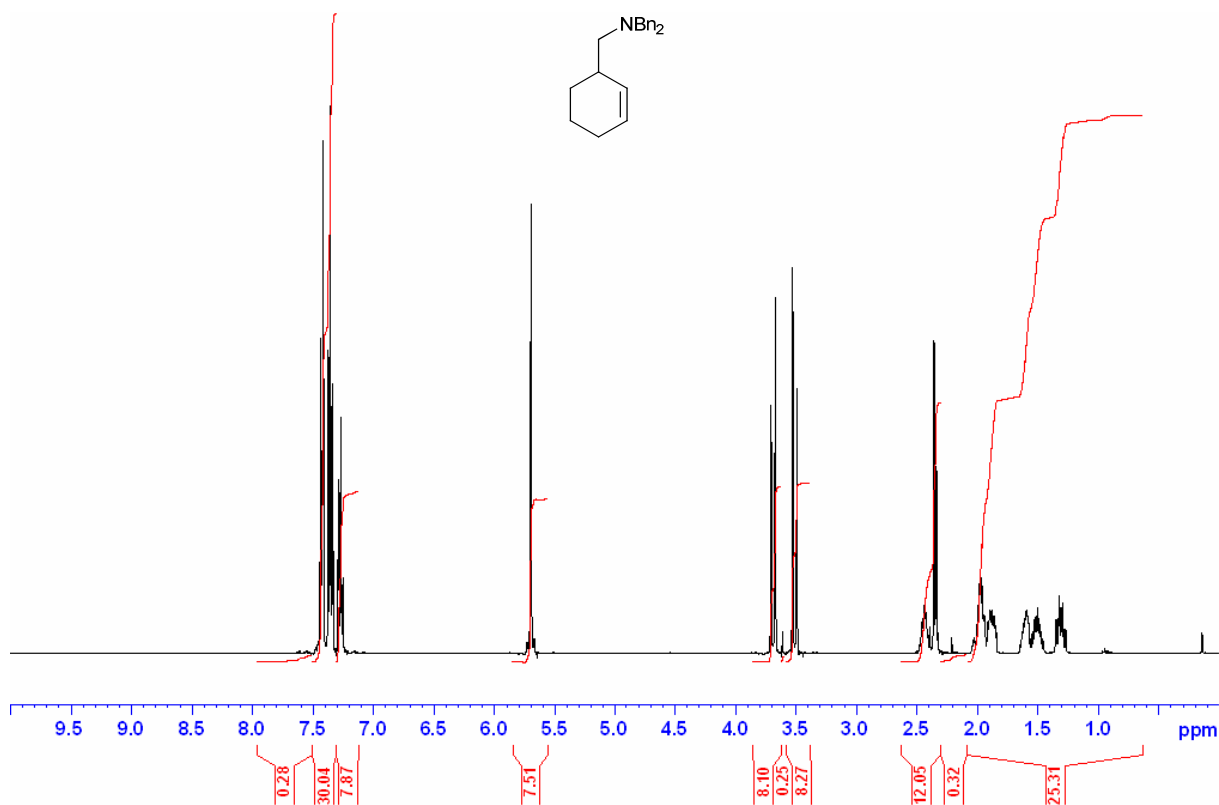

**(*RS*)-3-(*N,N*-Dibenzylamino)methyl-cyclohex-1-ene 65 (100 MHz  $^{13}\text{C}$ ,  $\text{CDCl}_3$ )**

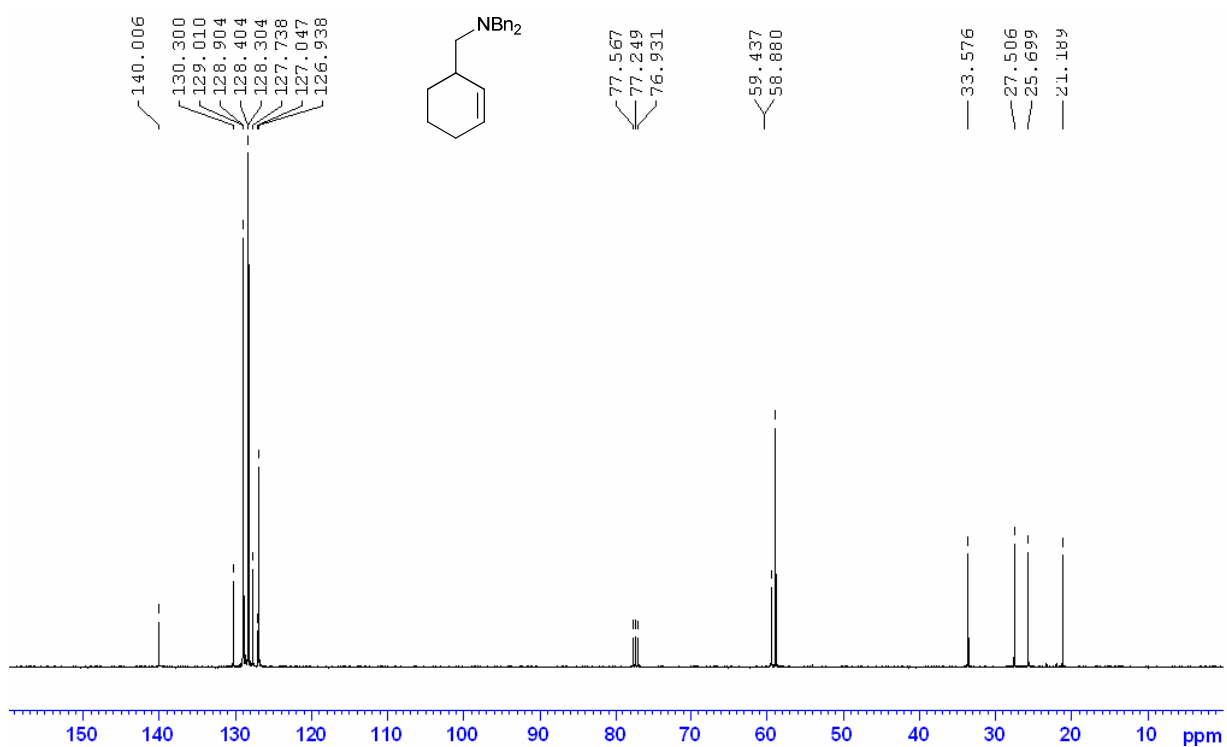

(1*RS*,2*SR*,3*RS*)- and (1*RS*,2*SR*,3*SR*)-1,2-Epoxy-3-hydroxymethyl-cyclohexane **66** and **67** (400 MHz  $^1\text{H}$ ,  $\text{CDCl}_3$ )

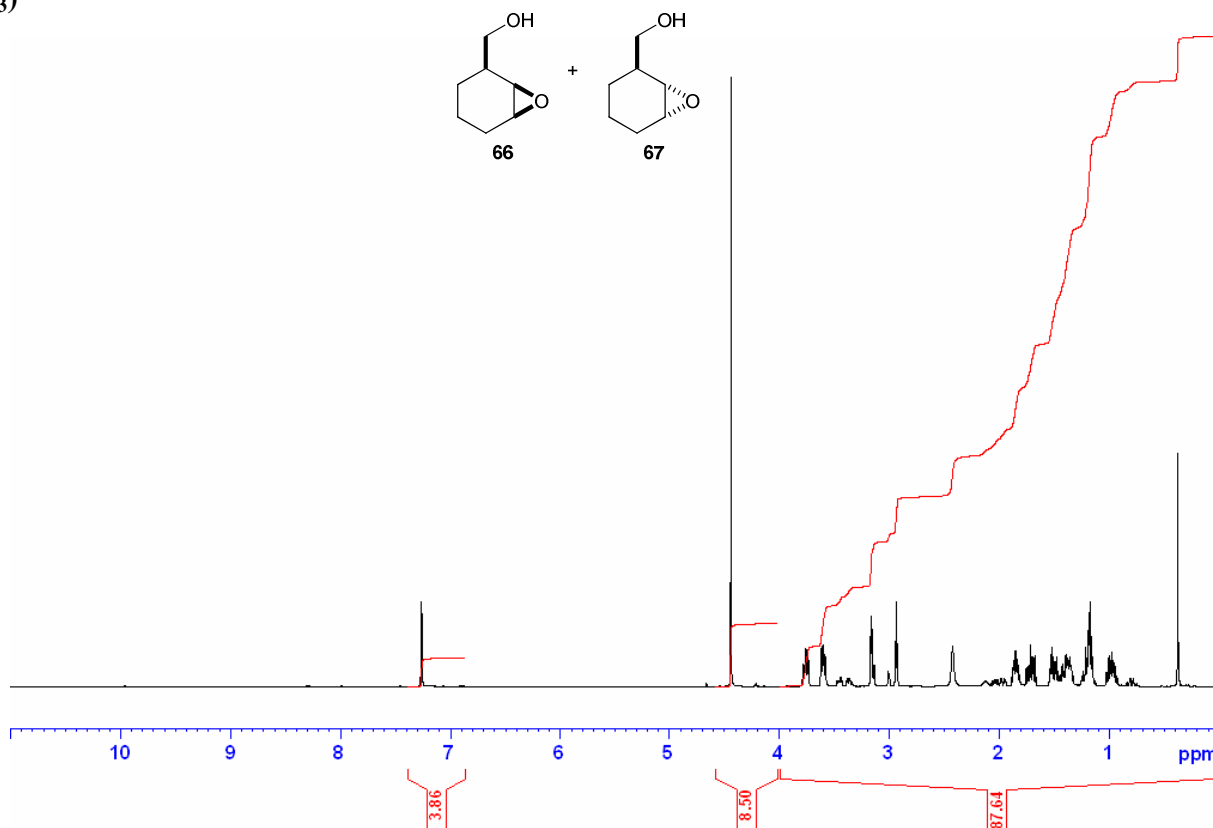

(1*RS*,2*SR*,3*RS*)- and (1*RS*,2*SR*,3*SR*)-1,2-Epoxy-3-hydroxymethyl-cyclohexane **66** and **67** (100 MHz  $^{13}\text{C}$ ,  $\text{CDCl}_3$ )

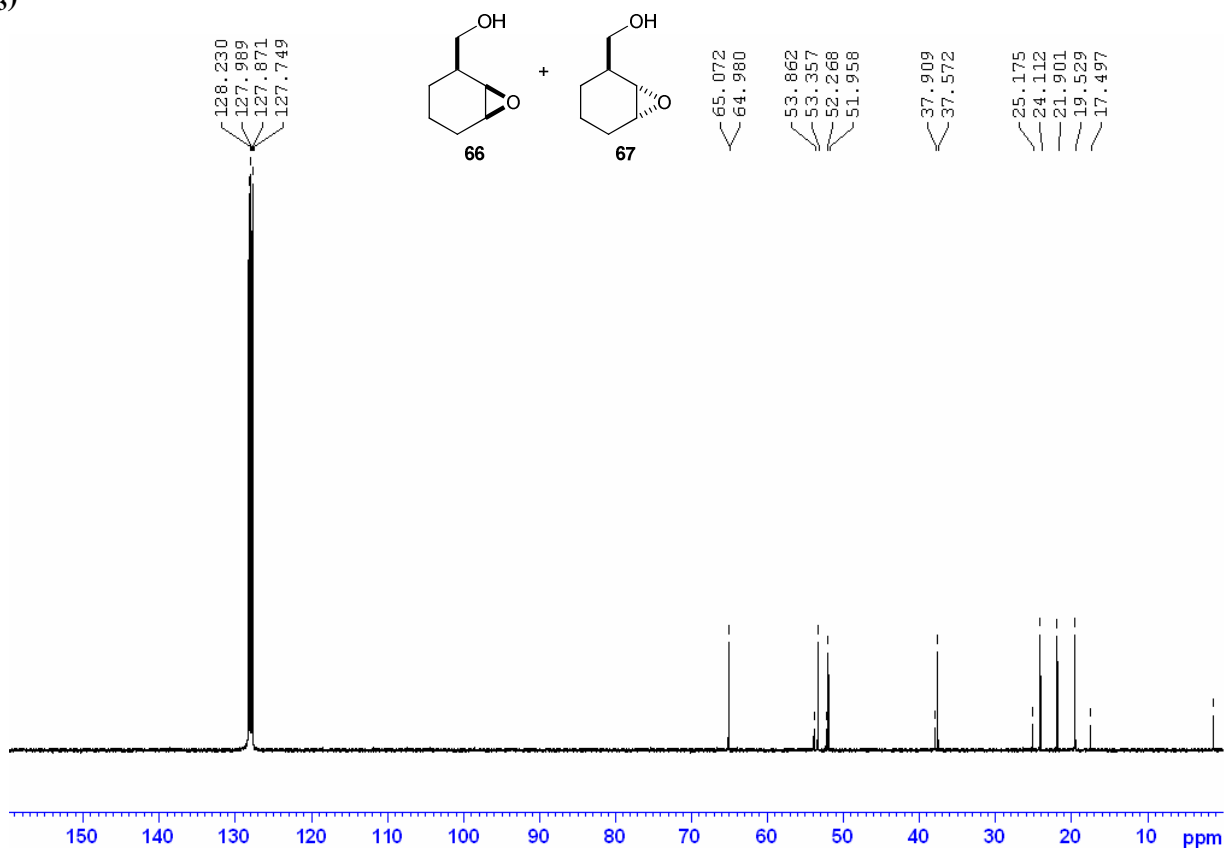

**(*RS*)-3-(Methoxymethyl)cyclohex-1-ene 68 (400 MHz  $^1\text{H}$ ,  $\text{CDCl}_3$ )**

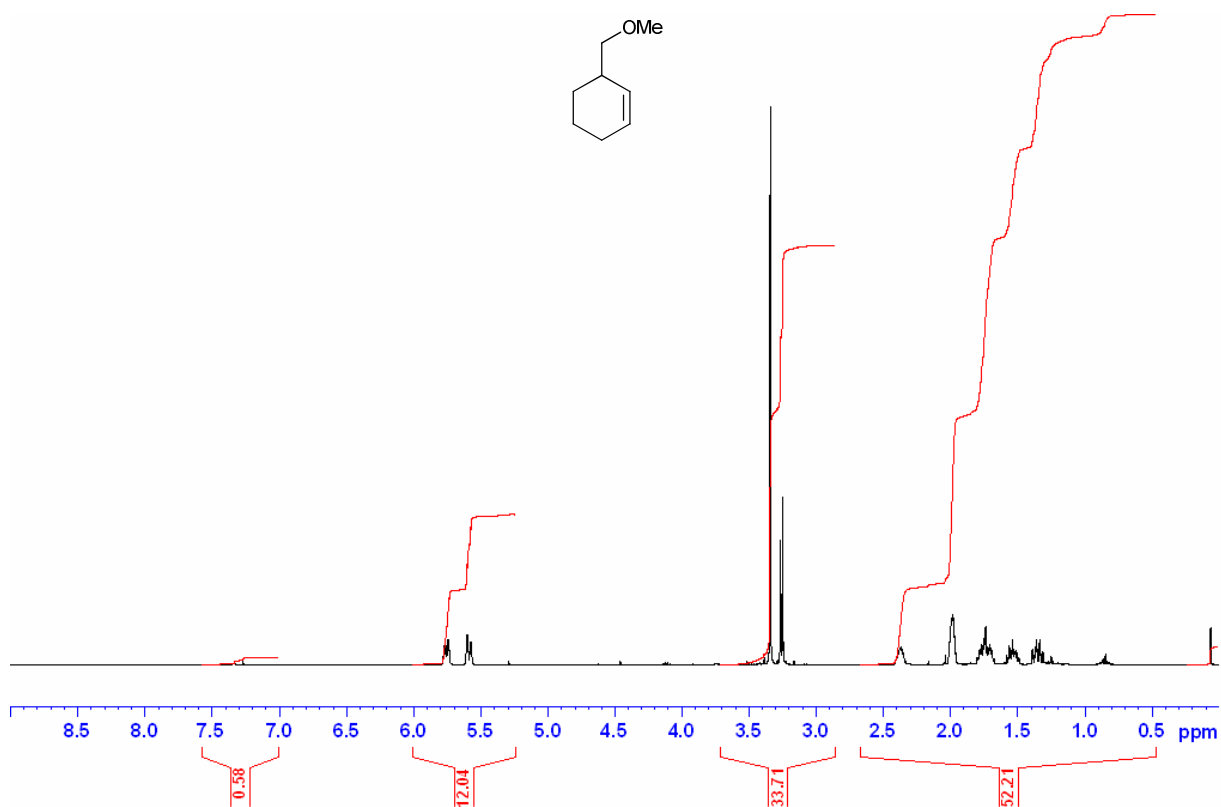

**(*RS*)-3-(Methoxymethyl)cyclohex-1-ene 68 (100 MHz  $^{13}\text{C}$ ,  $\text{CDCl}_3$ )**

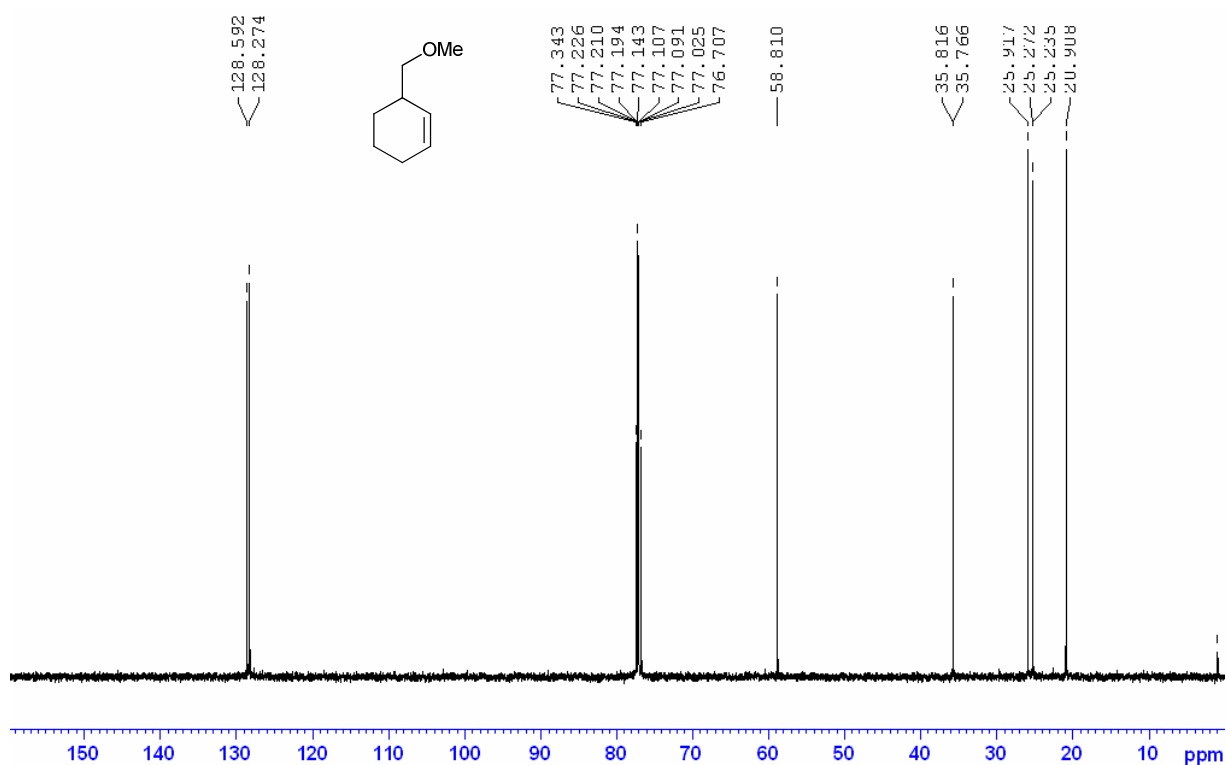

**(1*RS*,2*SR*,3*RS*)- and (1*RS*,2*SR*,3*SR*)-1,2-Epoxy-3-methoxymethyl-cyclohexane 69 and 70**

**(400 MHz,  $^1\text{H}$ ,  $\text{CDCl}_3$ )**

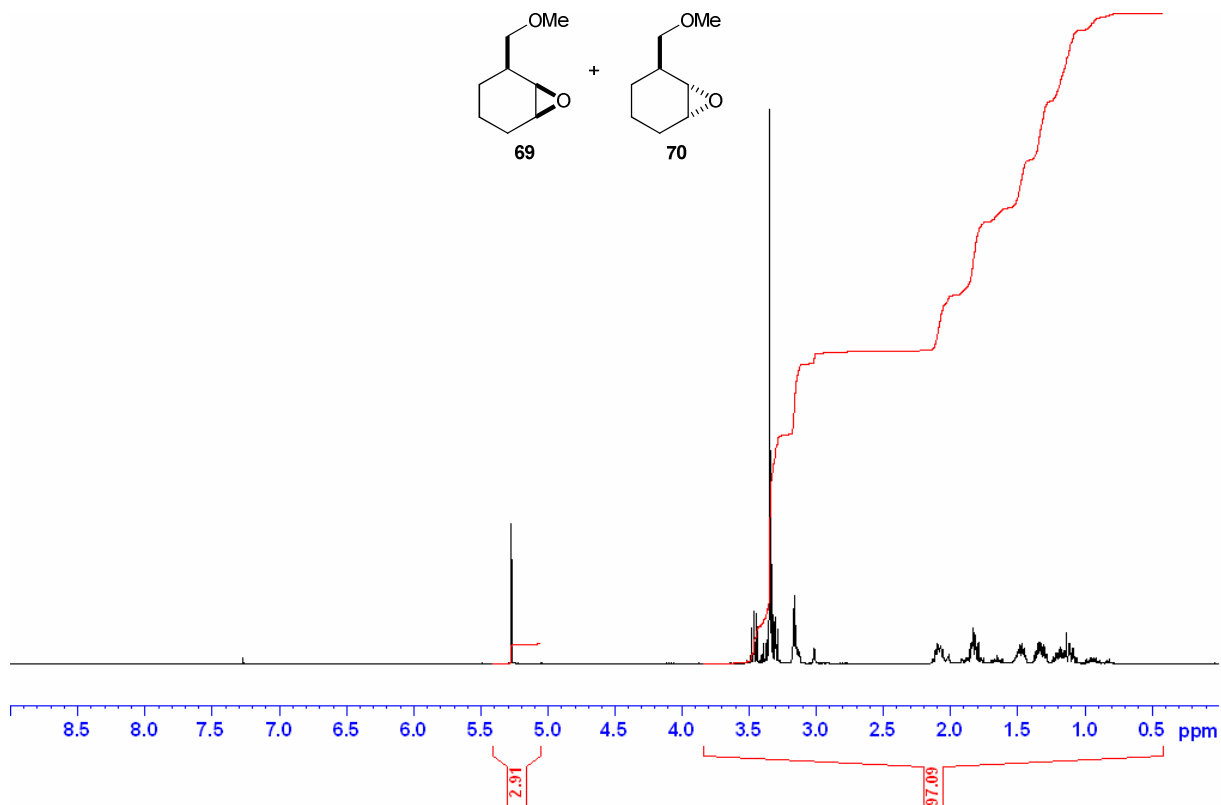

**(1*RS*,2*SR*,3*RS*)- and (1*RS*,2*SR*,3*SR*)-1,2-Epoxy-3-methoxymethyl-cyclohexane 69 and 70**

**(100 MHz,  $^{13}\text{C}$ ,  $\text{CDCl}_3$ )**

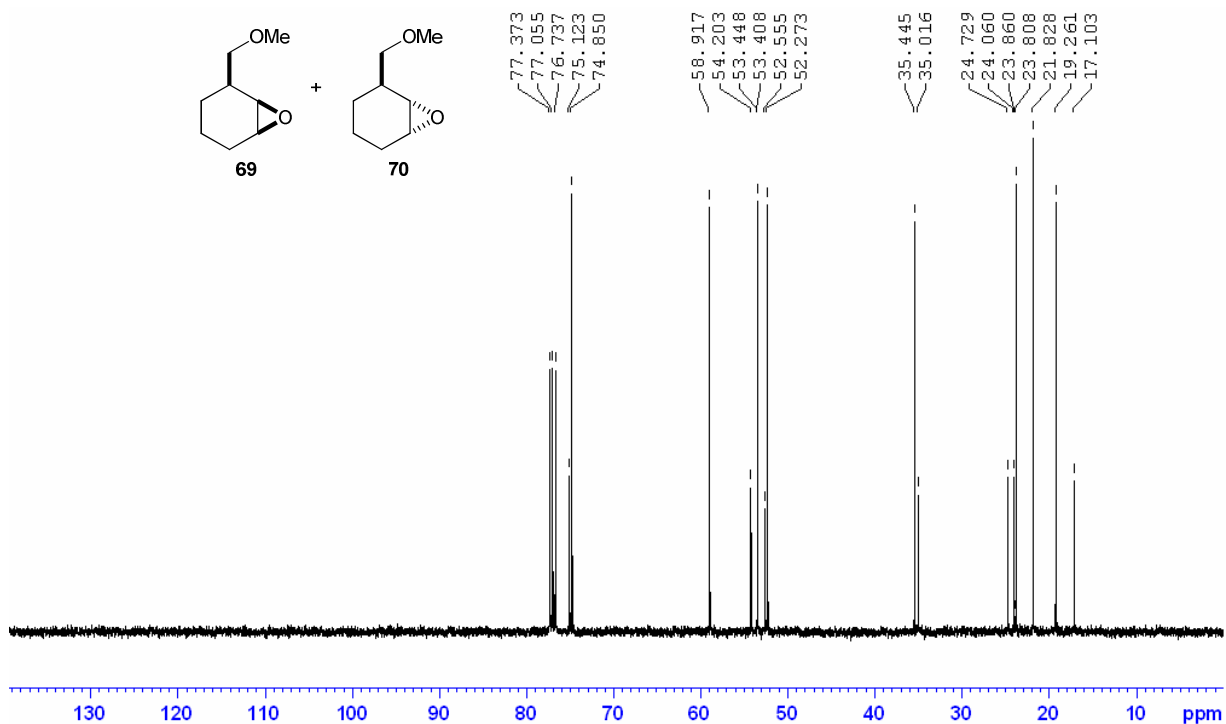



**(1*RS*,2*RS*,3*SR*)-3-(*N*-Benzylamino)methyl-cyclohexane-1,2-diol 71 (400 MHz,  $^1\text{H}$ ,  $\text{CDCl}_3$ )**

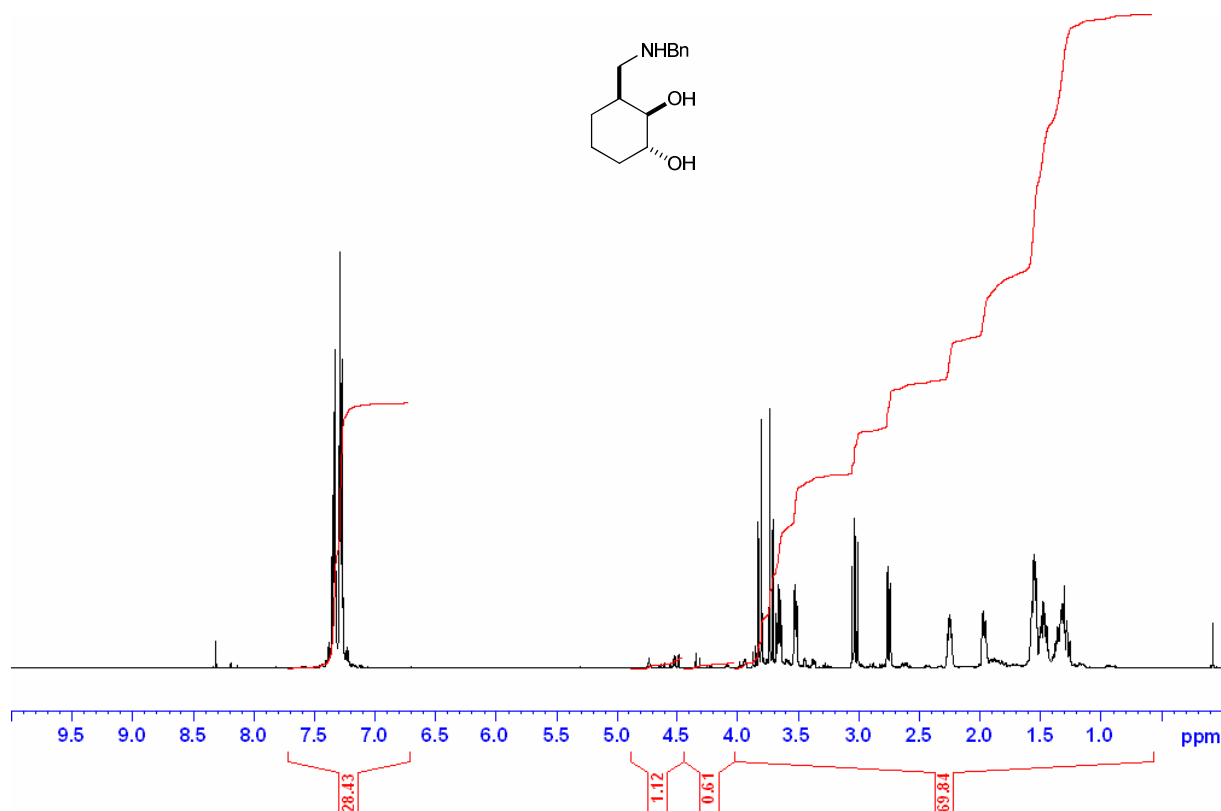

**(1*RS*,2*RS*,3*SR*)-3-(*N*-Benzylamino)methyl-cyclohexane-1,2-diol 71 (100 MHz,  $^{13}\text{C}$ ,  $\text{CDCl}_3$ )**

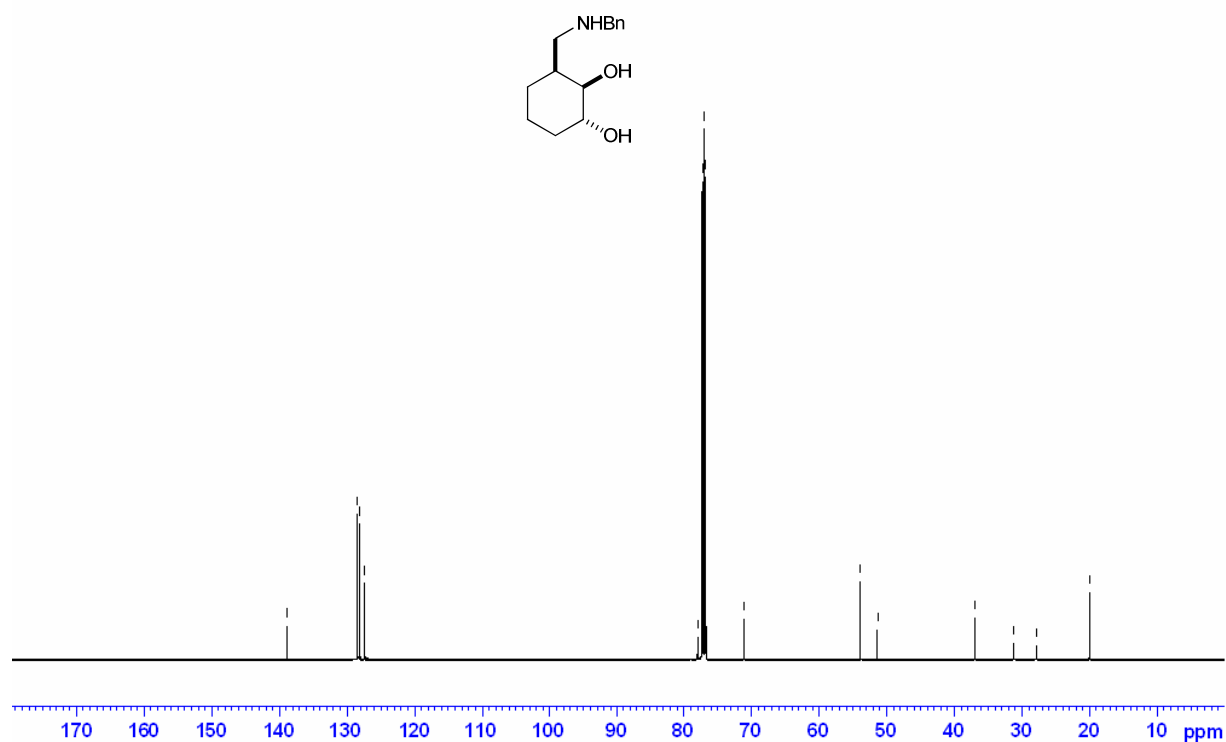

**(1*RS*,2*RS*,3*SR*)-3-(*N,N*-Dibenzylamino)methyl-cyclohexane-1,2-diol 75 (400 MHz  $^1\text{H}$ ,  $\text{CDCl}_3$ )**

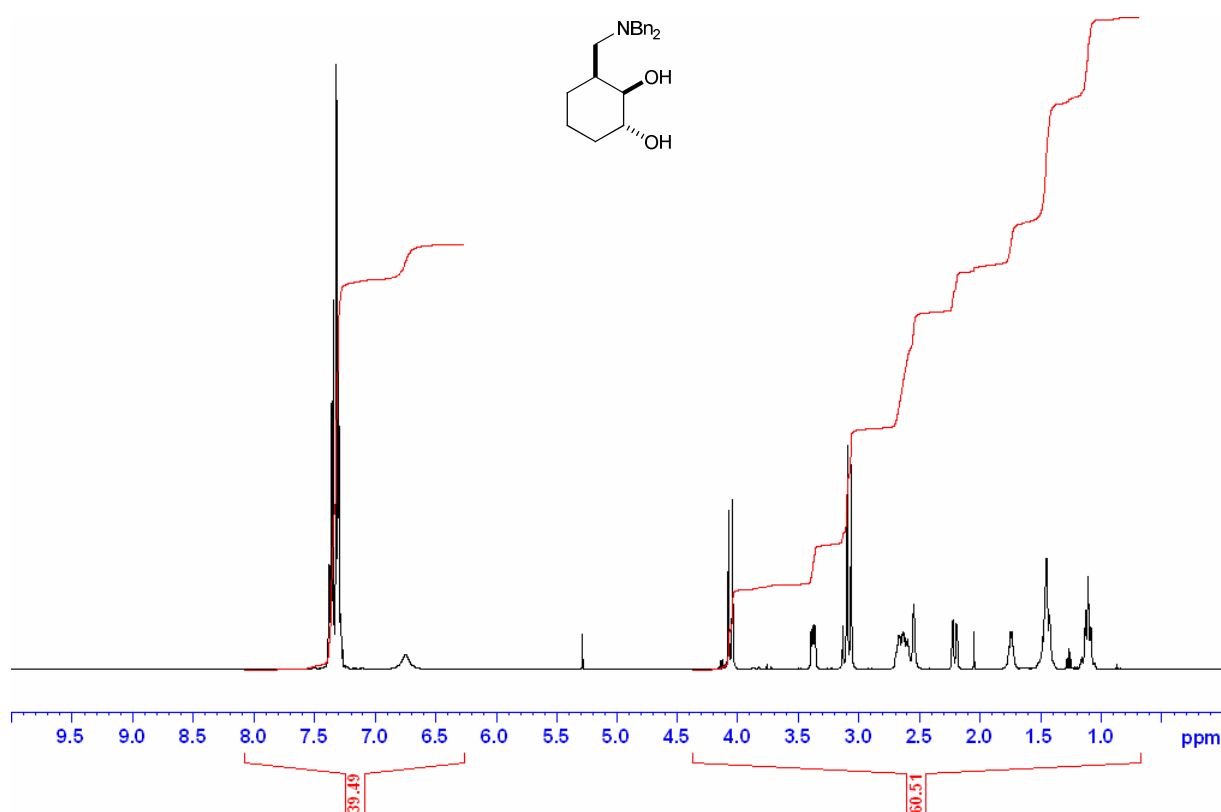

**(1*RS*,2*RS*,3*SR*)-3-(*N,N*-Dibenzylamino)methyl-cyclohexane-1,2-diol 75 (100 MHz  $^{13}\text{C}$ ,  $\text{CDCl}_3$ )**

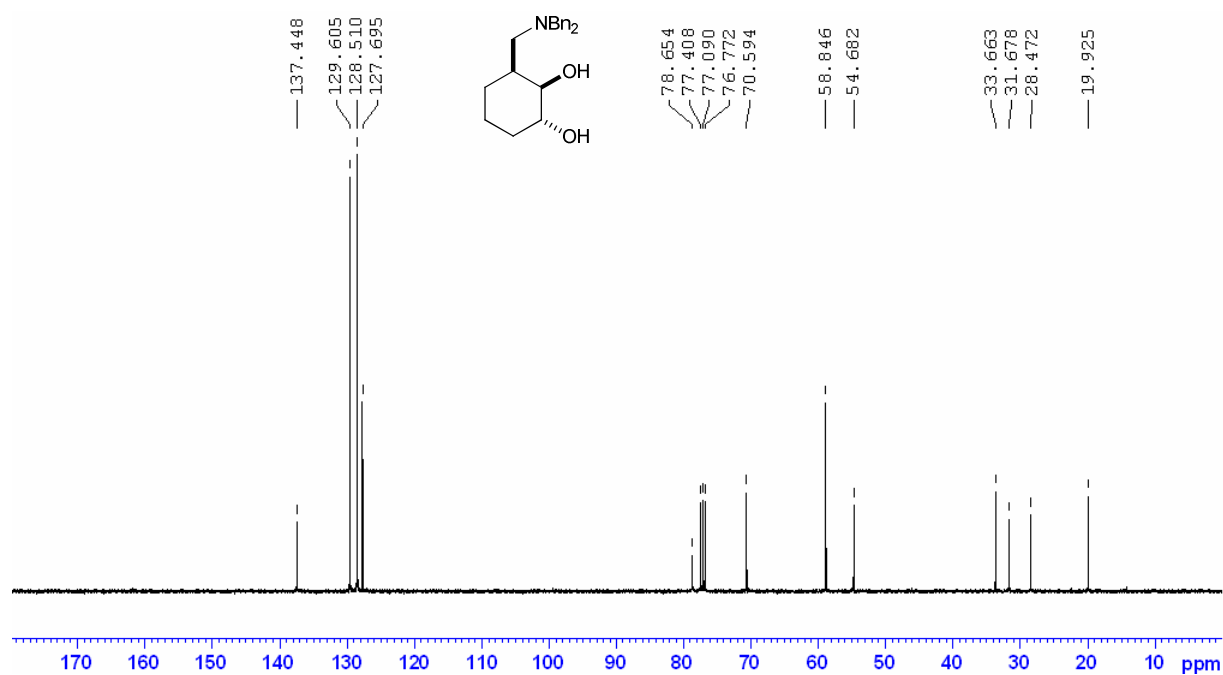

**(1*RS*,2*RS*,3*RS*)-3-(*N,N*-Dibenzylamino)methyl-cyclohexane-1,2-diol 76 (400 MHz  $^1\text{H}$ ,  $\text{CDCl}_3$ )**

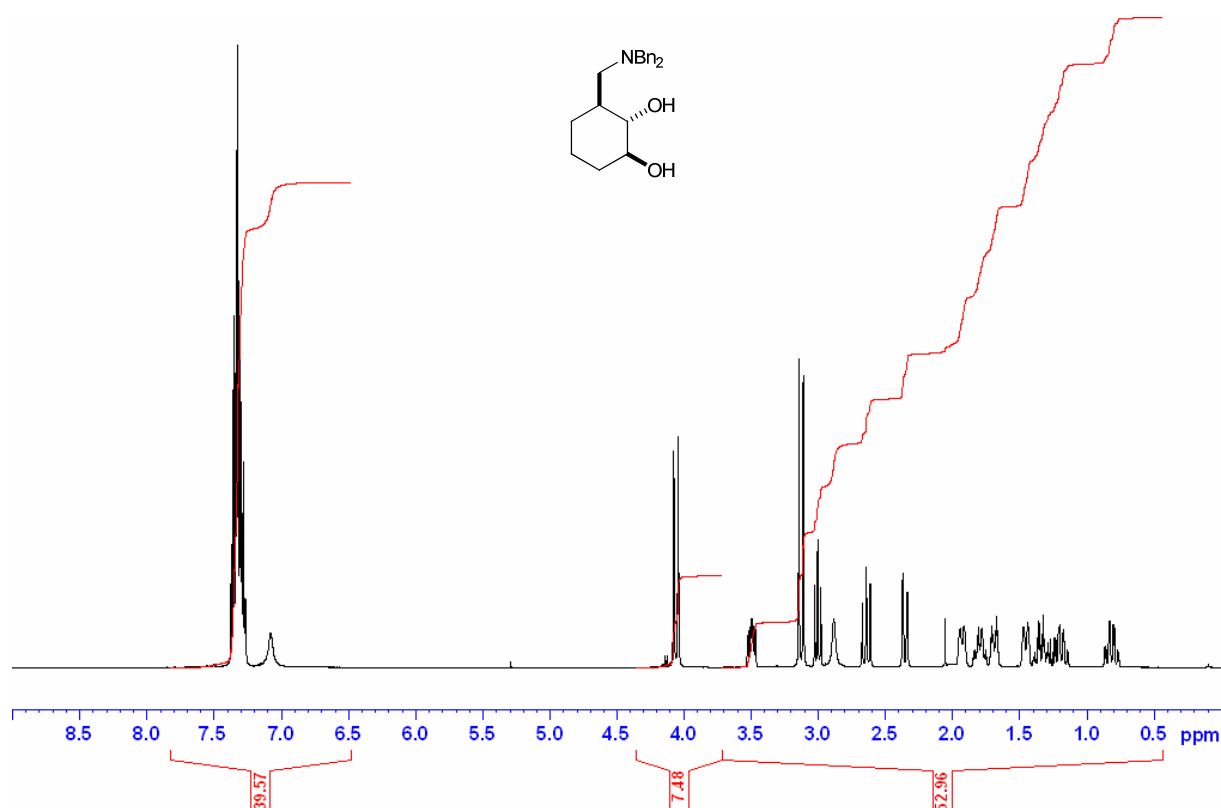

**(1*RS*,2*RS*,3*RS*)-3-(*N,N*-Dibenzylamino)methyl-cyclohexane-1,2-diol 76 (100 MHz  $^{13}\text{C}$ ,  $\text{CDCl}_3$ )**

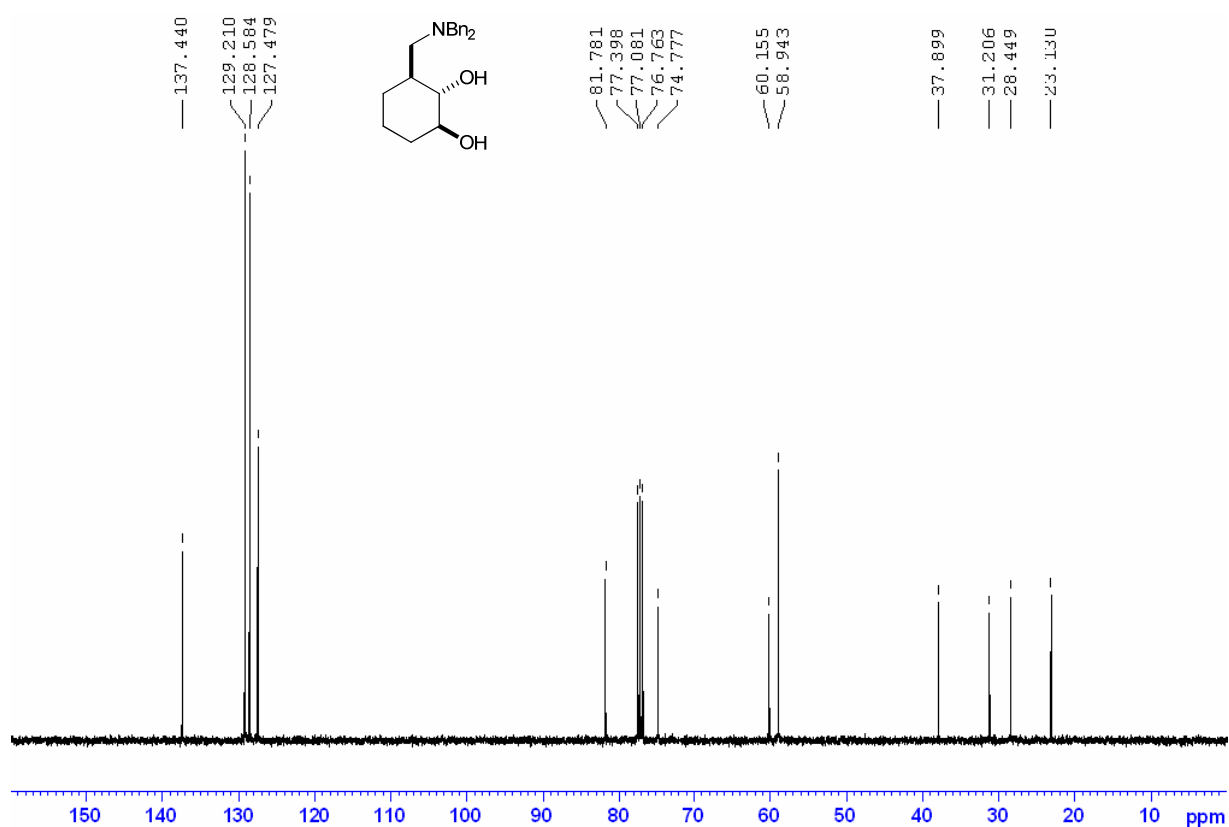

**(1*RS*,2*RS*,3*SR*)-1-(*p*-Toluenesulfonyloxy)-2-hydroxy-3-(*N,N*-dibenzylamino)methyl-cyclohexane 77**

**(400 MHz  $^1\text{H}$ ,  $\text{CDCl}_3$ )**

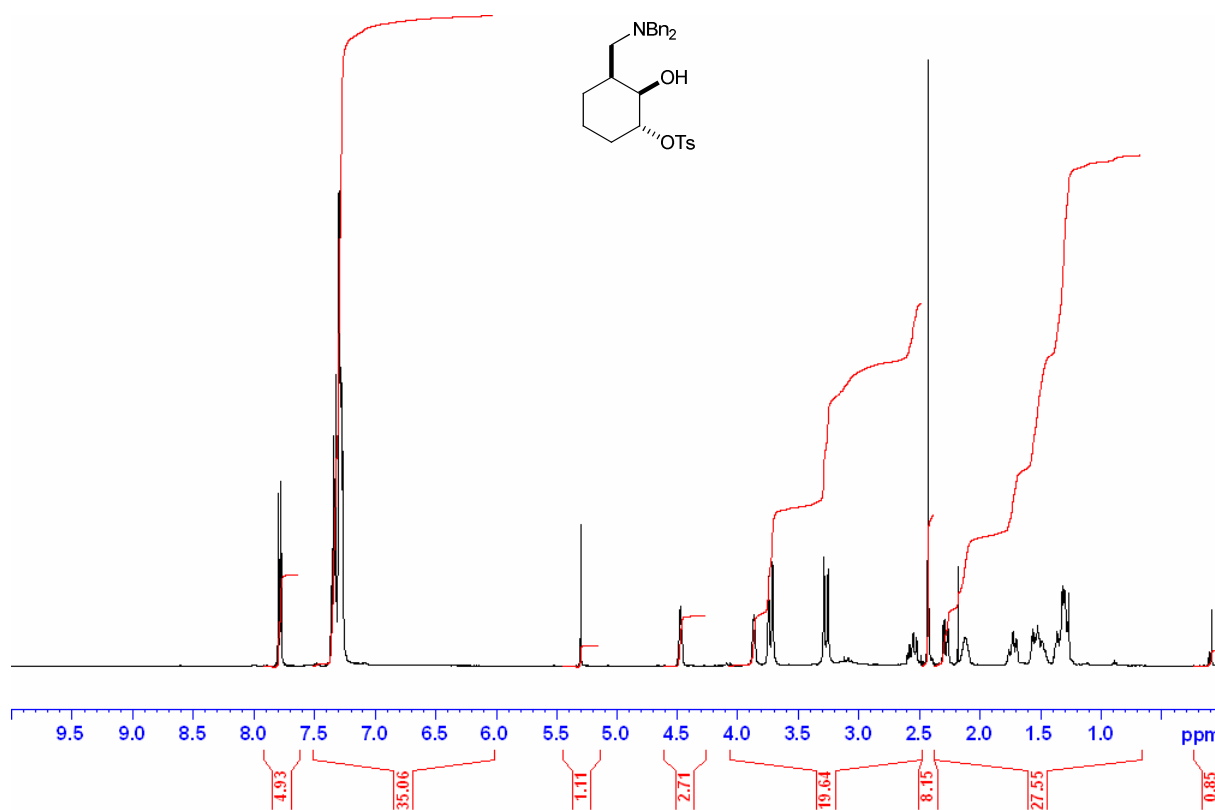

**(1*RS*,2*RS*,3*SR*)-1-(*p*-Toluenesulfonyloxy)-2-hydroxy-3-(*N,N*-dibenzylamino)methyl-cyclohexane 77**

**(100 MHz  $^{13}\text{C}$ ,  $\text{CDCl}_3$ )**

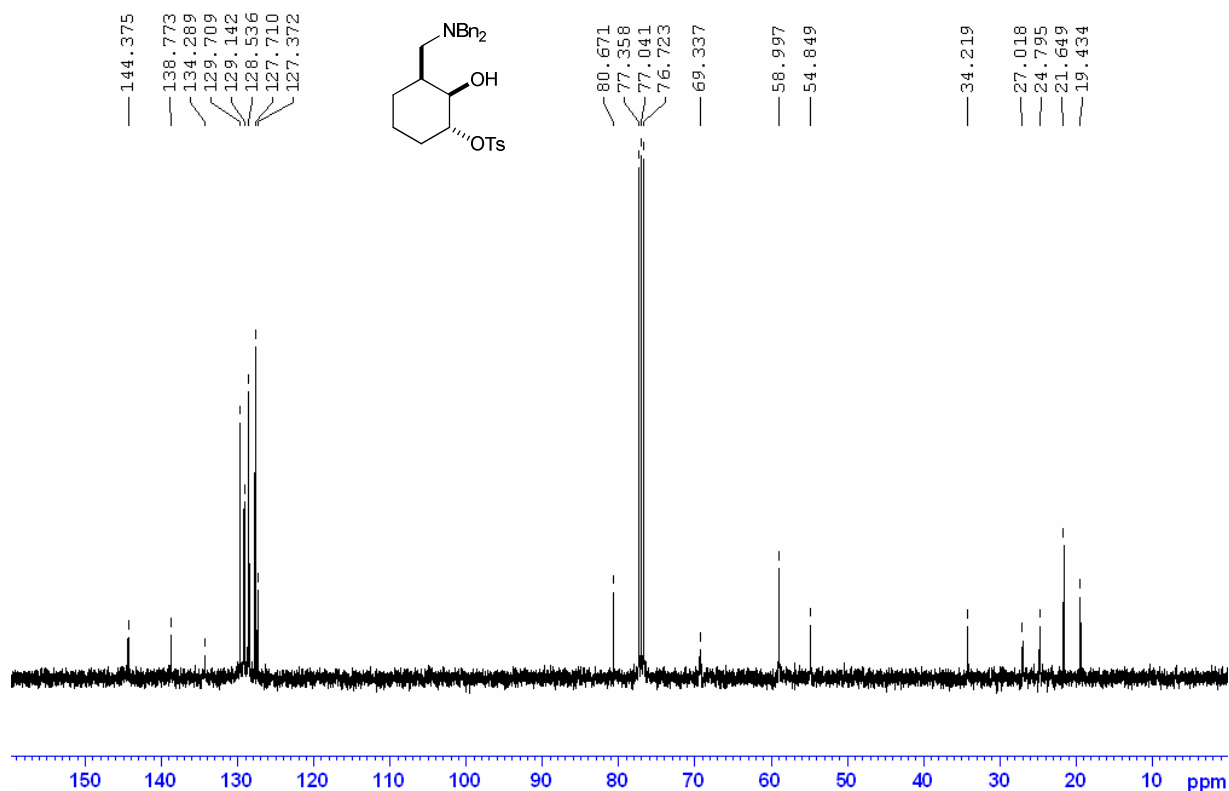

**(1*RS*,2*RS*,3*RS*)-1-(*p*-Toluenesulfonyloxy)-2-hydroxy-3-(*N,N*-dibenzylamino)methyl-cyclohexane 78**

**(400 MHz  $^1\text{H}$ ,  $\text{CDCl}_3$ )**

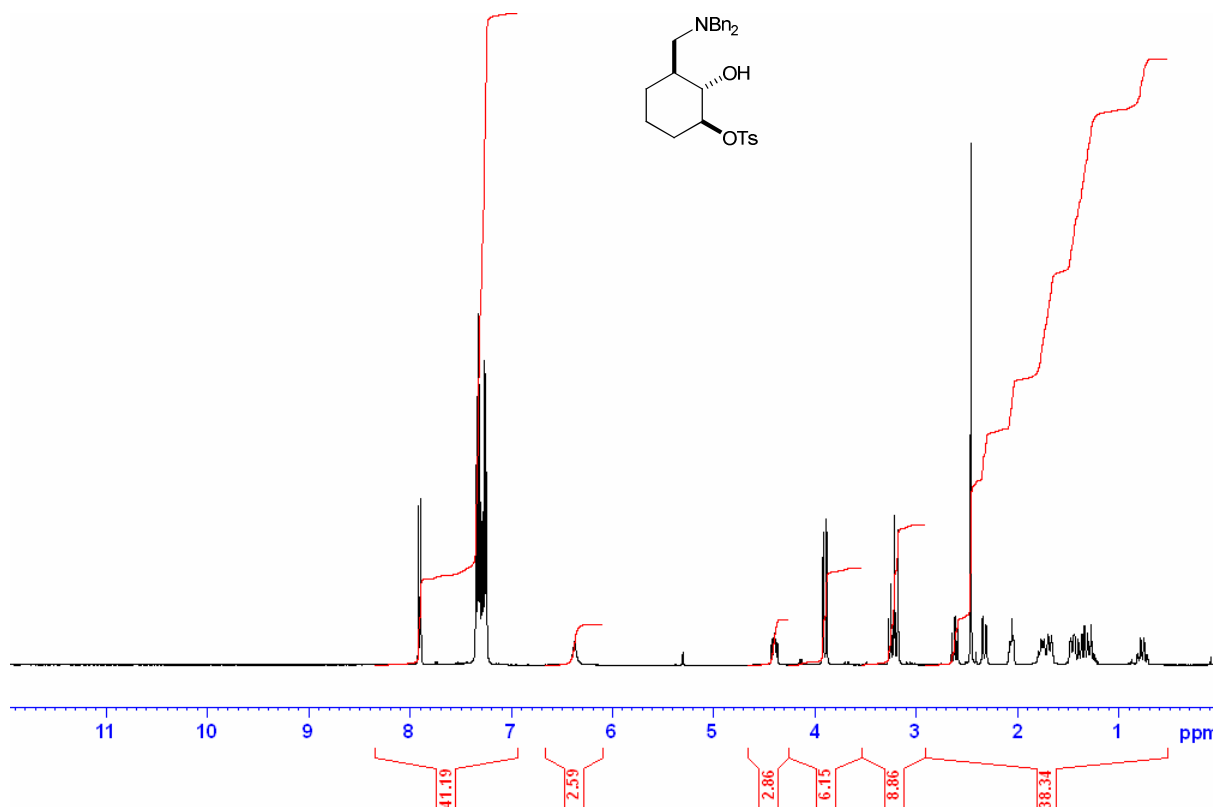

**(1*RS*,2*RS*,3*RS*)-1-(*p*-Toluenesulfonyloxy)-2-hydroxy-3-(*N,N*-dibenzylamino)methyl-cyclohexane 78**

**(100 MHz  $^{13}\text{C}$ ,  $\text{CDCl}_3$ )**

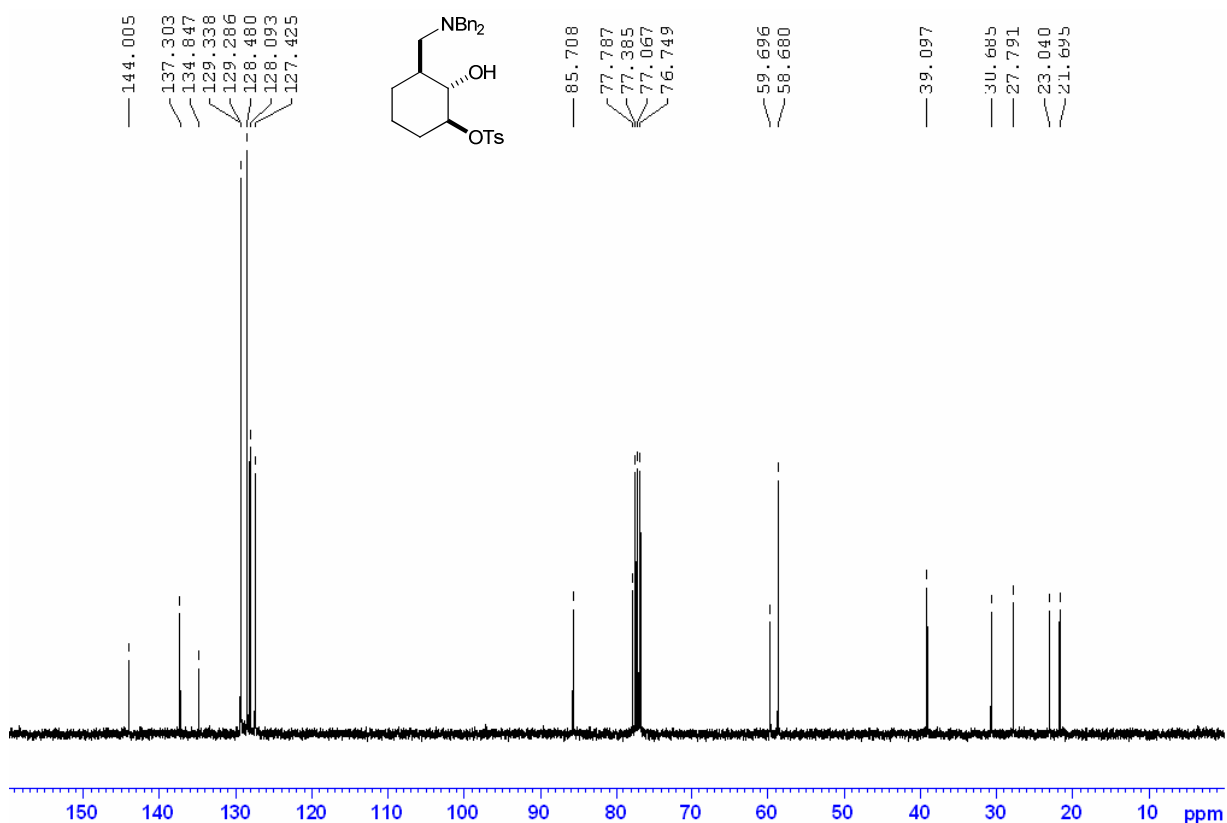

**(1*RS*,2*SR*,3*RS*)-1,2-Epoxy-3-(*N,N*-dibenzylamino)methyl-cyclohexane 79 (400 MHz  $^1\text{H}$ ,  $\text{CDCl}_3$ )**

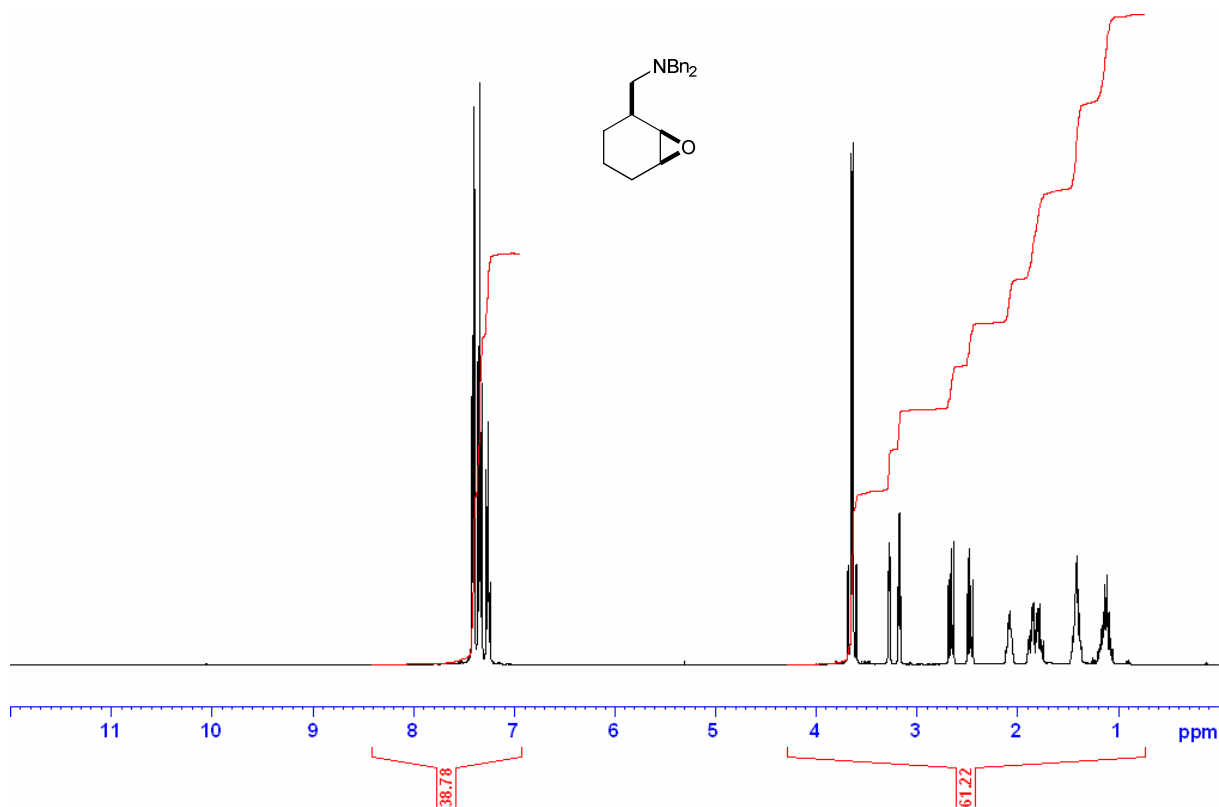

**(1*RS*,2*SR*,3*RS*)-1,2-Epoxy-3-(*N,N*-dibenzylamino)methyl-cyclohexane 79 (100 MHz  $^{13}\text{C}$ ,  $\text{CDCl}_3$ )**

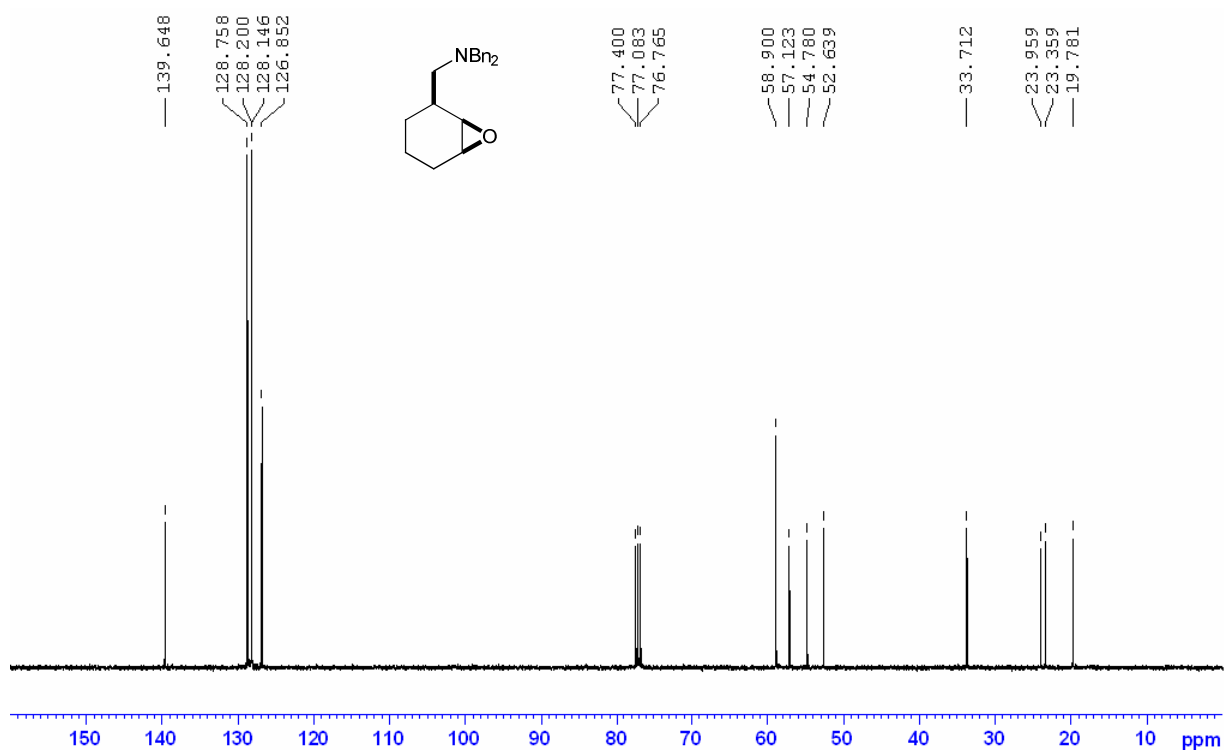

**(1*RS*,2*SR*,3*SR*)-1,2-Epoxy-3-(*N,N*-dibenzylamino)methyl-cyclohexane 80 (400 MHz  $^1\text{H}$ ,  $\text{CDCl}_3$ )**

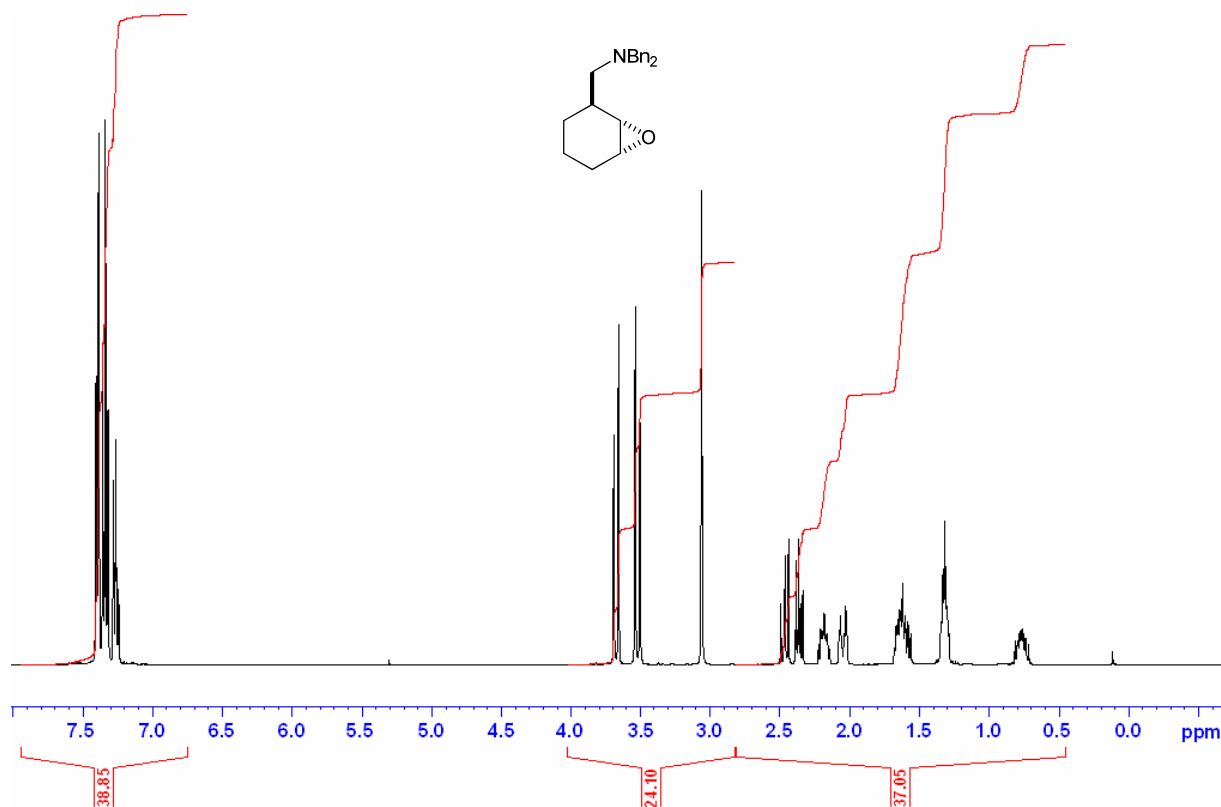

**(1*RS*,2*SR*,3*SR*)-1,2-Epoxy-3-(*N,N*-dibenzylamino)methyl-cyclohexane 80 (100 MHz  $^{13}\text{C}$ ,  $\text{CDCl}_3$ )**

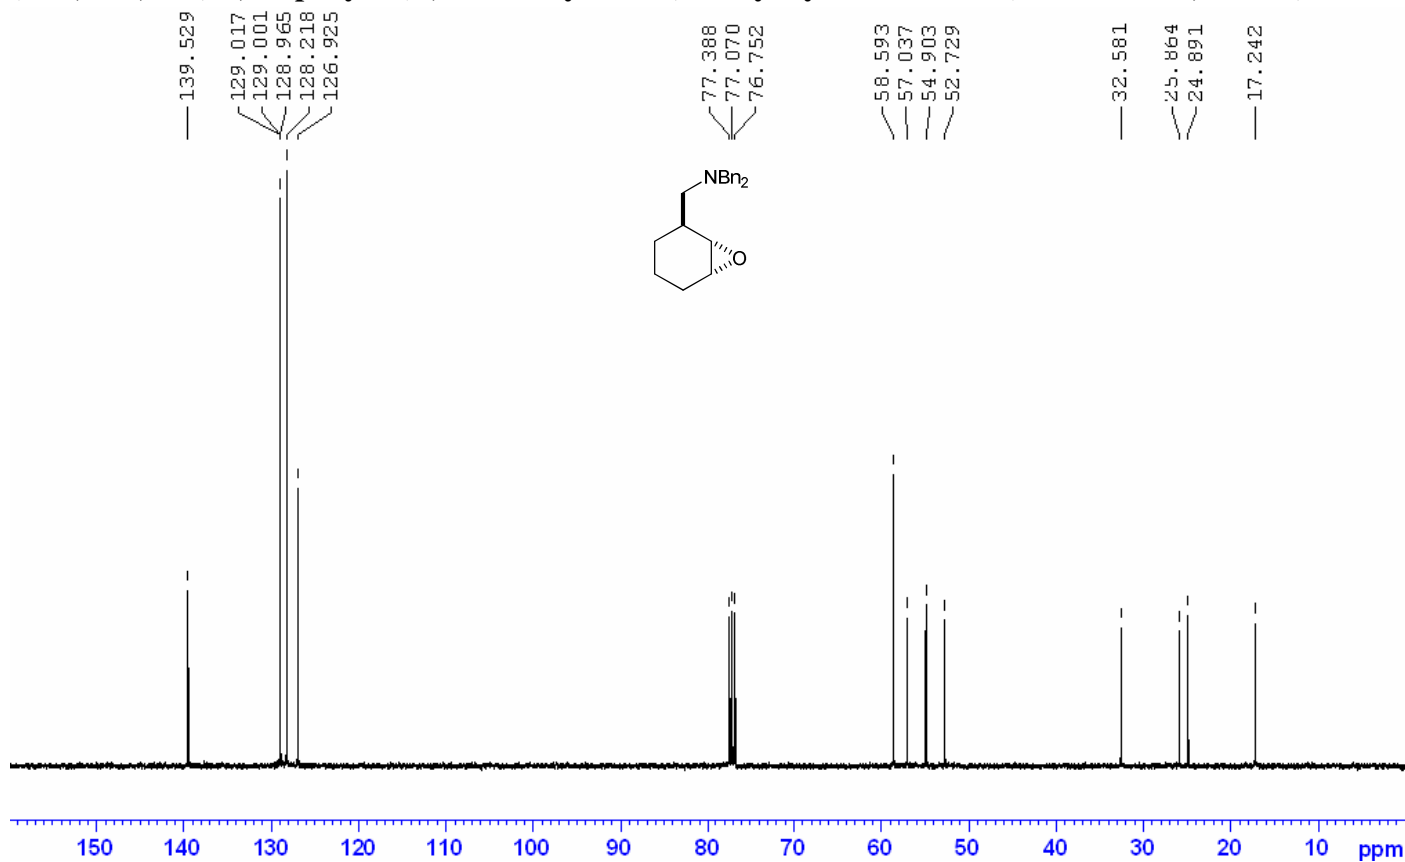

**(1*RS*,2*RS*,3*SR*)-1-Acetoxy-2-hydroxy-3-(*N,N*-dibenzylamino)methyl-cyclohexane 81**

**(400 MHz  $^1\text{H}$ ,  $\text{CDCl}_3$ )**

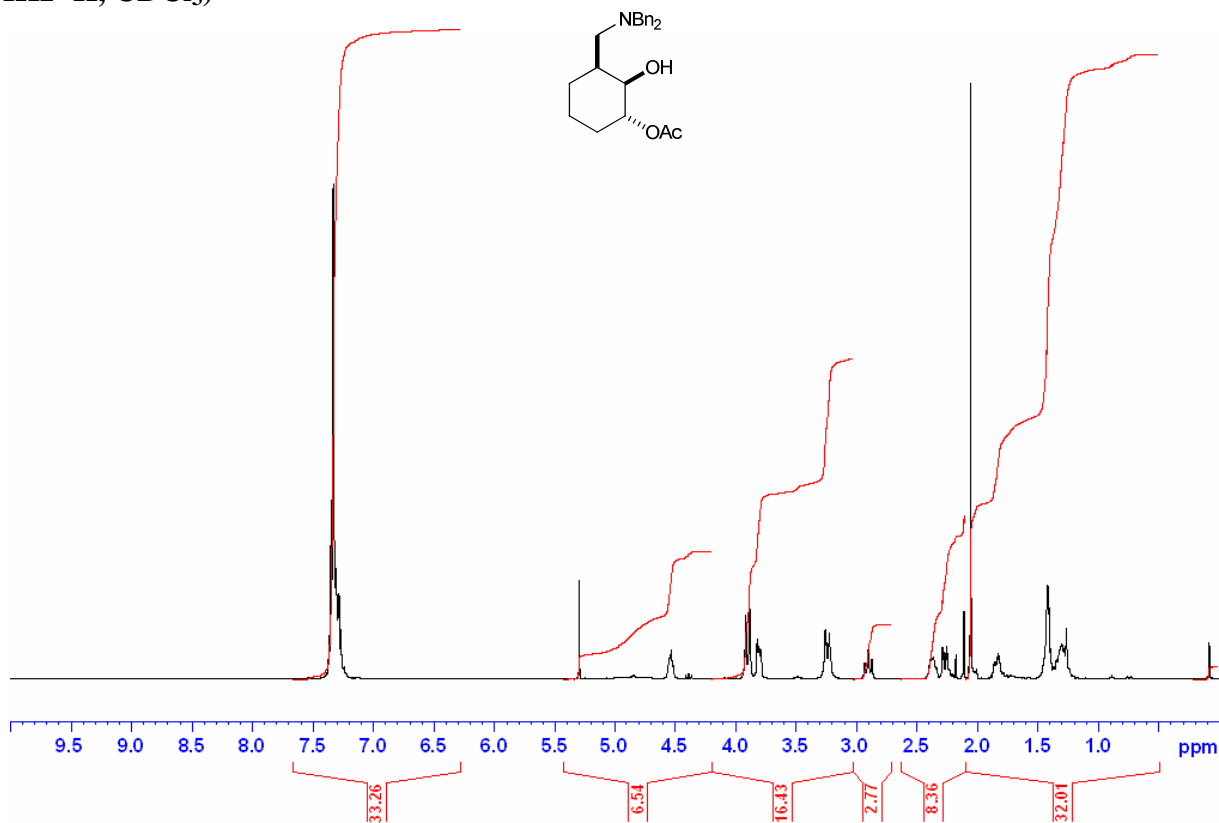

**(1*RS*,2*RS*,3*SR*)-1-Acetoxy-2-hydroxy-3-(*N,N*-dibenzylamino)methyl-cyclohexane 81**

**(100 MHz  $^{13}\text{C}$ ,  $\text{CDCl}_3$ )**

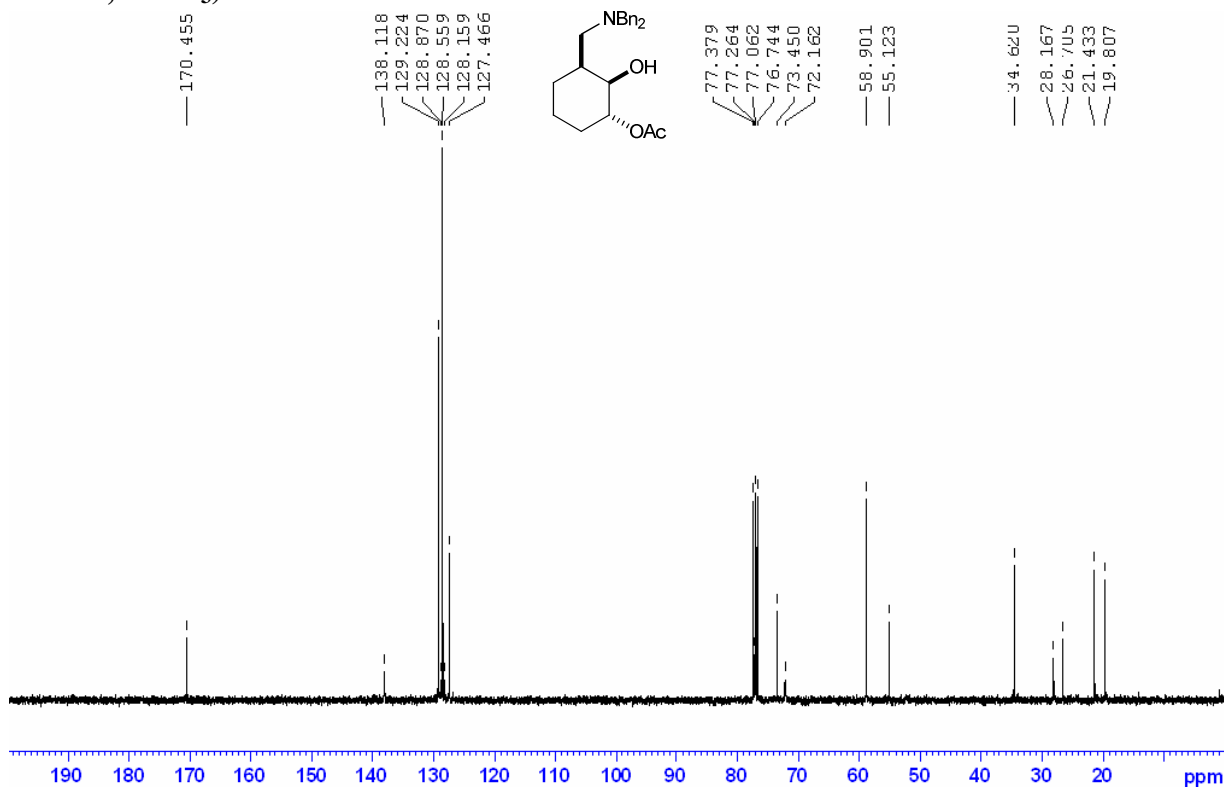



**(1*RS*,2*RS*,3*SR*)-1-Acetoxy-2-methanesulfonyloxy-3-(*N,N*-dibenzylamino)methyl-cyclohexane 82**

**(400 MHz,  $^1\text{H}$ ,  $\text{CDCl}_3$ )**

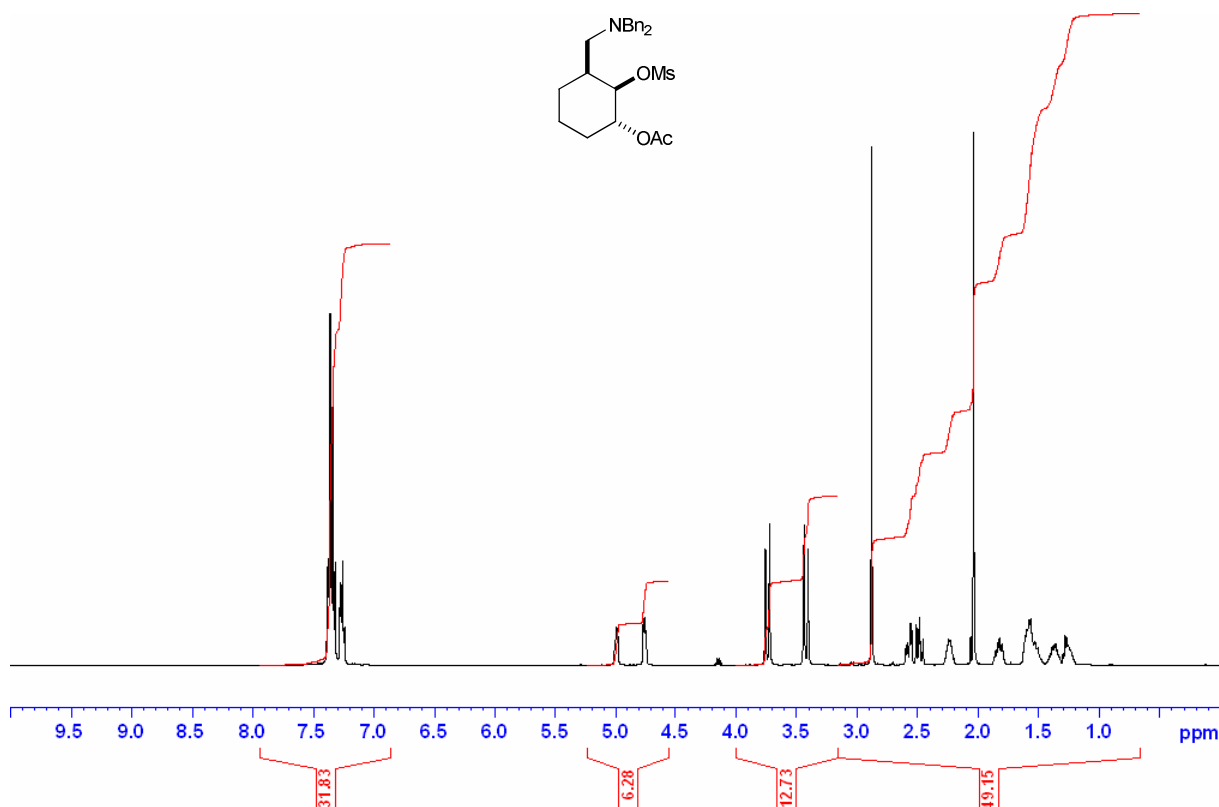

**(1*RS*,2*RS*,3*SR*)-1-Acetoxy-2-methanesulfonyloxy-3-(*N,N*-dibenzylamino)methyl-cyclohexane 82**

**(100 MHz,  $^{13}\text{C}$ ,  $\text{CDCl}_3$ )**

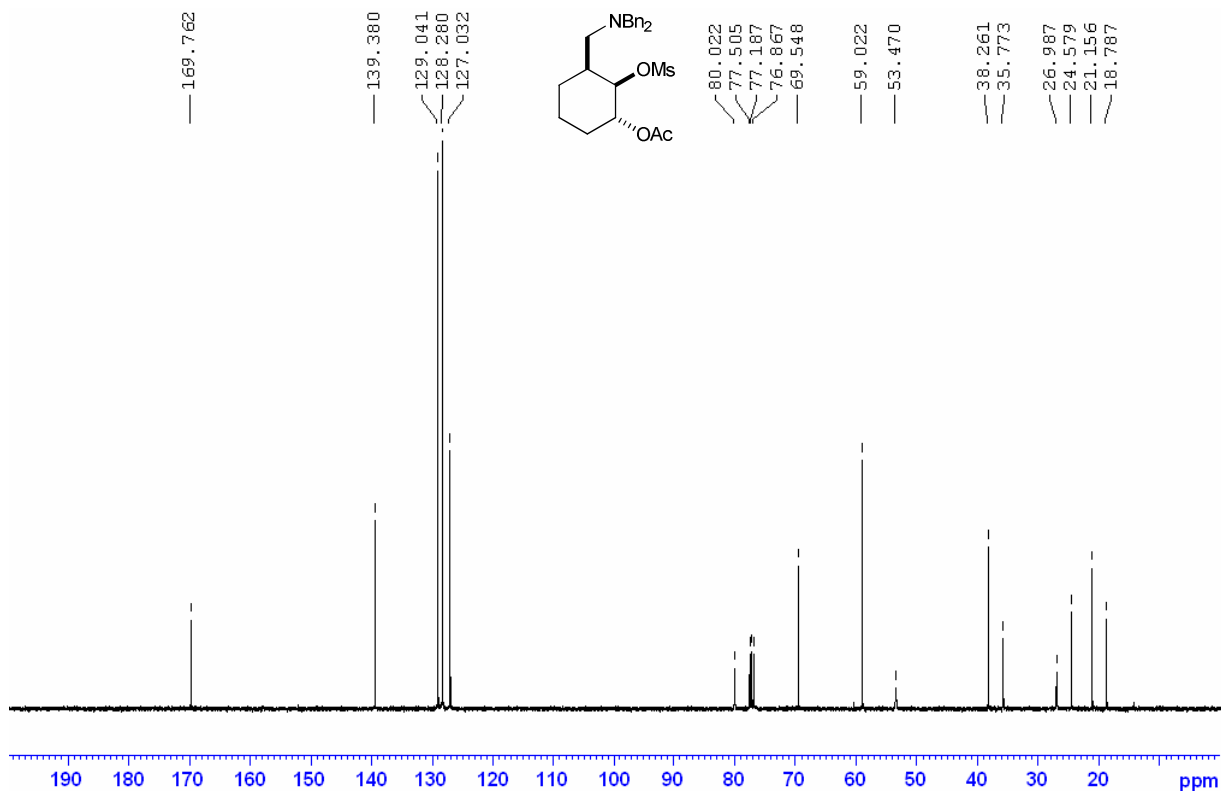

**(1*RS*,2*RS*,3*SR*)-1-Hydroxy-2-(*p*-toluenesulfonyloxy)-3-(*N,N*-dibenzylamino)methyl-cyclohexane 83**

**(400 MHz,  $^1\text{H}$ ,  $\text{CDCl}_3$ )**

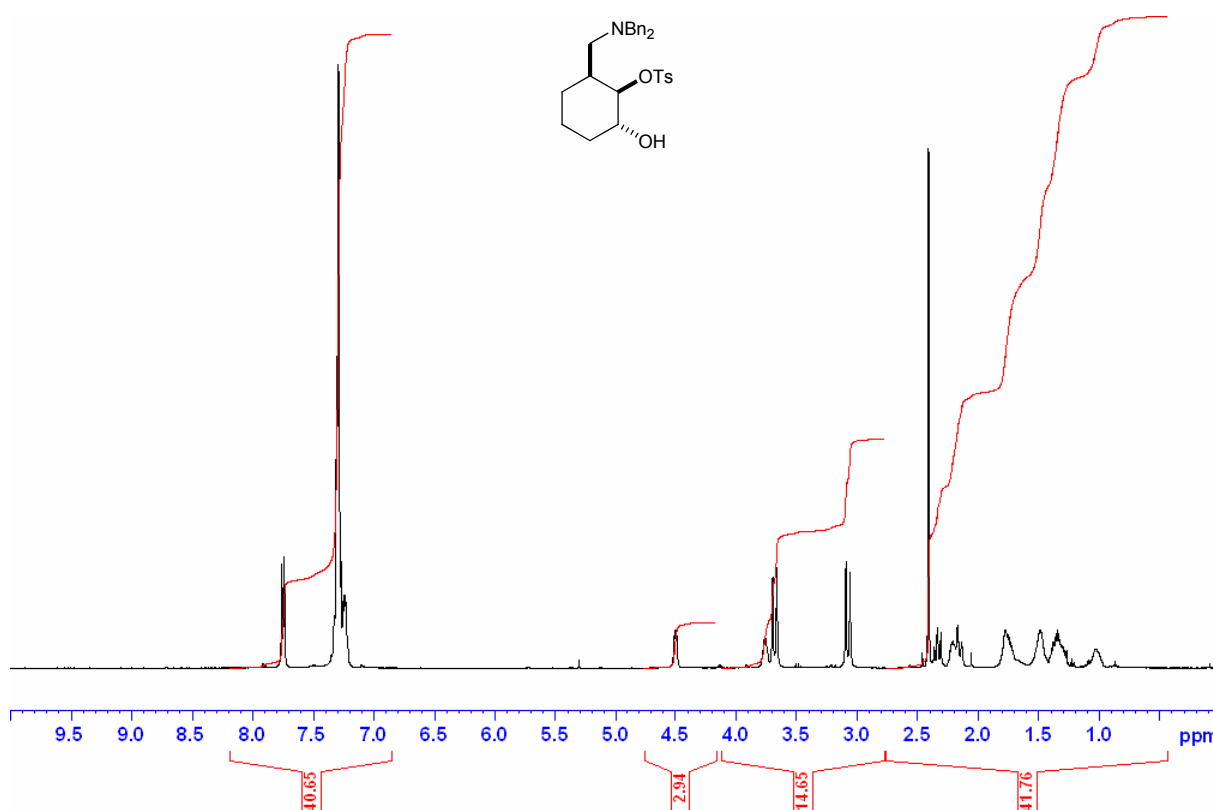

**(1*RS*,2*RS*,3*SR*)-1-Hydroxy-2-(*p*-toluenesulfonyloxy)-3-(*N,N*-dibenzylamino)methyl-cyclohexane 83**

**(100 MHz,  $^{13}\text{C}$ ,  $\text{CDCl}_3$ )**

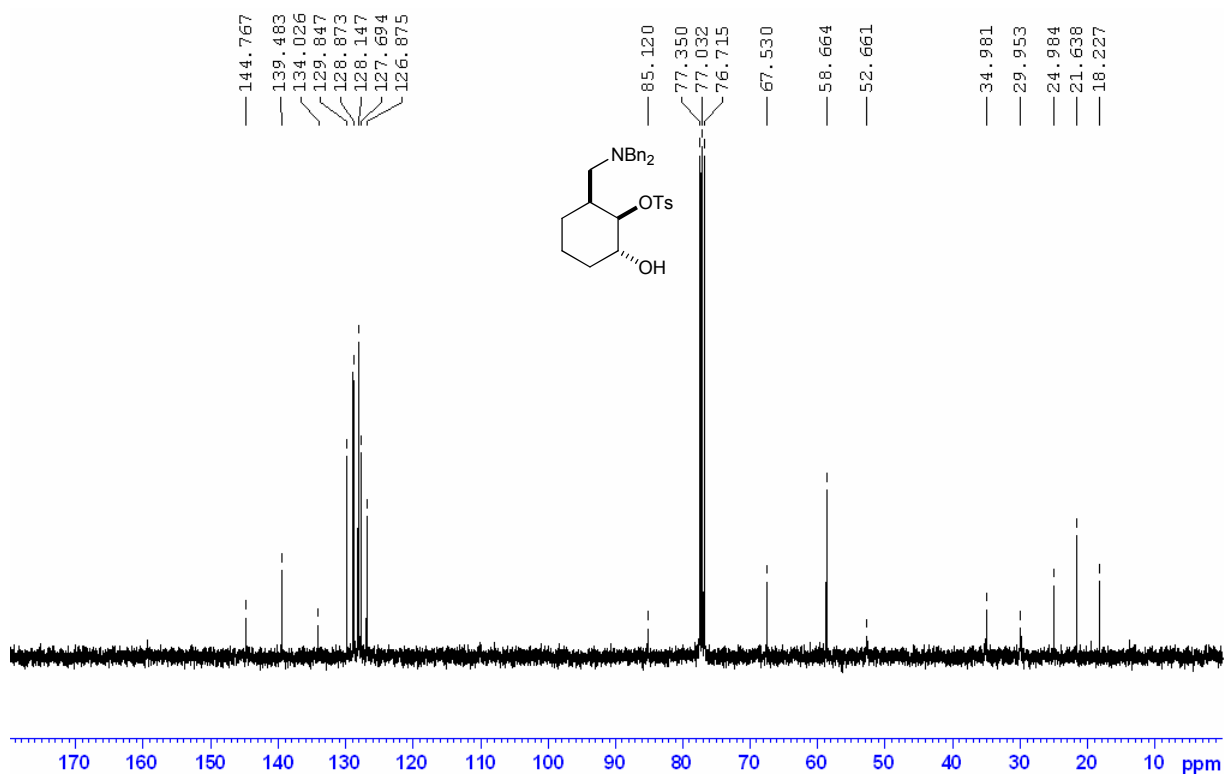

**(1*RS*,2*RS*,3*RS*)-1-Acetoxy-2-hydroxy-3-(*N,N*-dibenzylamino)methyl-cyclohexane 84**

**(400 MHz,  $^1\text{H}$ ,  $\text{CDCl}_3$ )**

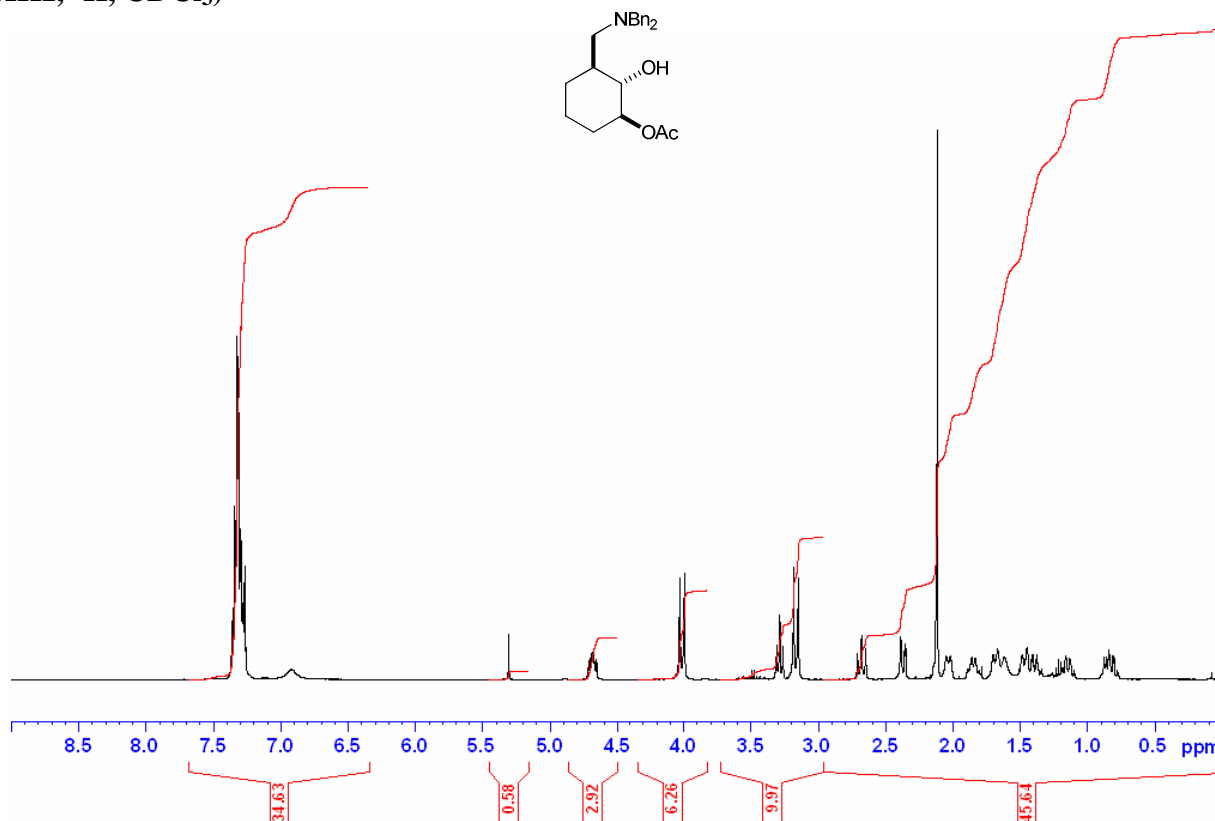

**(1*RS*,2*RS*,3*RS*)-1-Acetoxy-2-hydroxy-3-(*N,N*-dibenzylamino)methyl-cyclohexane 84**

**(100 MHz,  $^{13}\text{C}$ ,  $\text{CDCl}_3$ )**

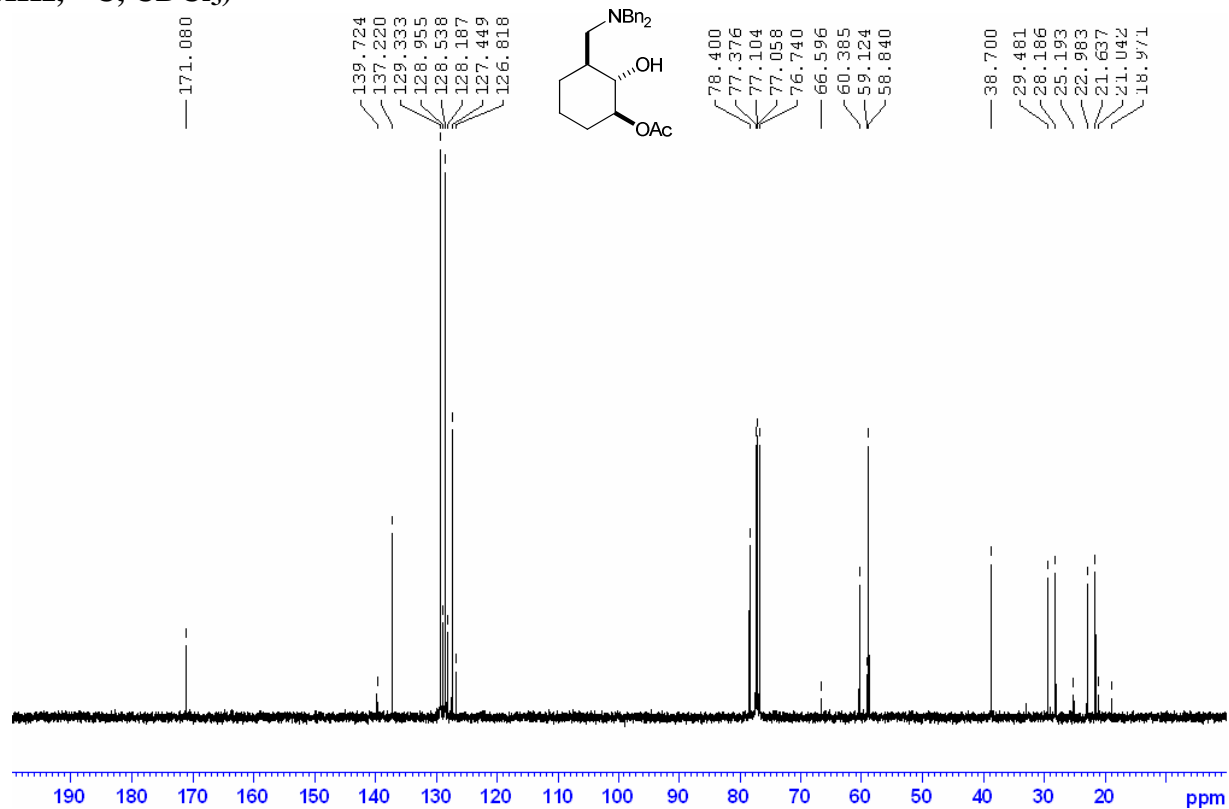

**(1*RS*,2*RS*,3*SR*)-1-hydroxy-2-acetoxy-3-(*N,N*-dibenzylamino)methyl-cyclohexane 85**

**(400 MHz,  $^1\text{H}$ ,  $\text{CDCl}_3$ )**

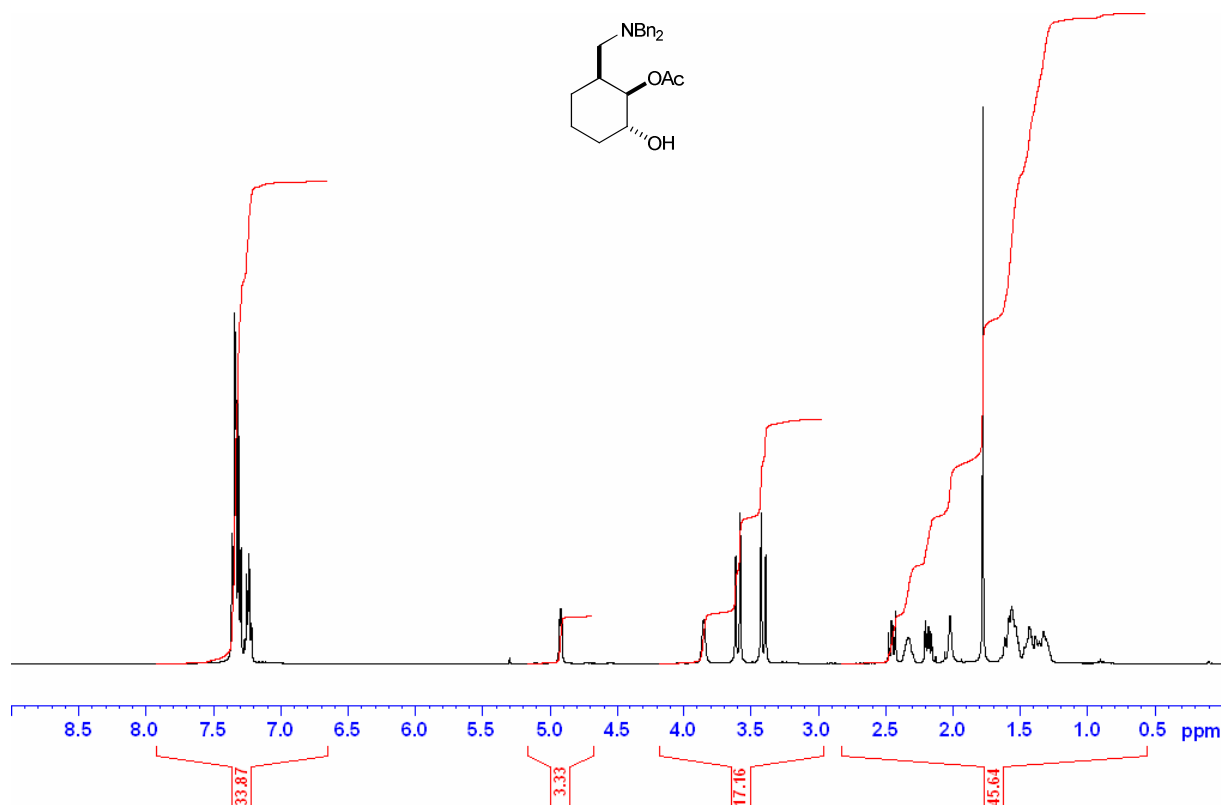

**(1*RS*,2*RS*,3*SR*)-1-hydroxy-2-acetoxy-3-(*N,N*-dibenzylamino)methyl-cyclohexane 85**

**(100 MHz,  $^{13}\text{C}$ ,  $\text{CDCl}_3$ )**

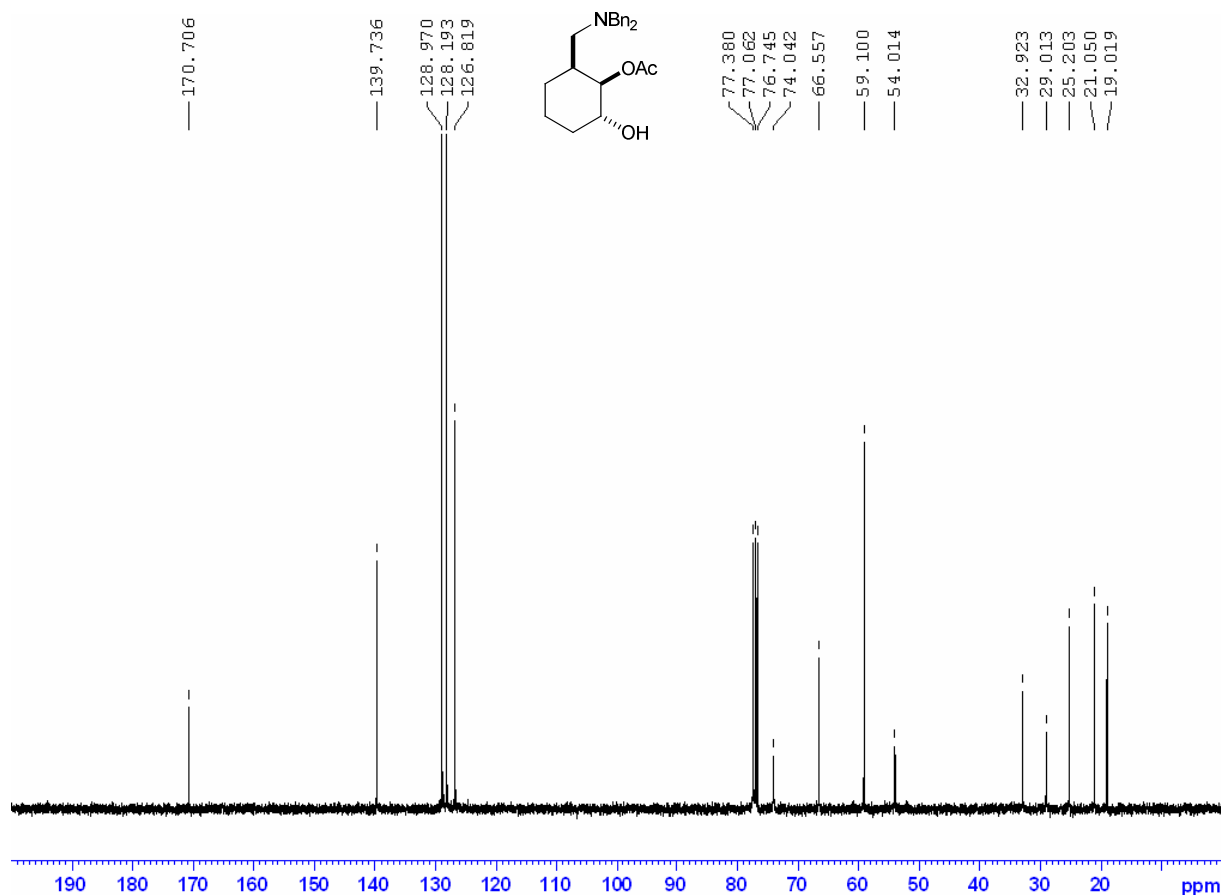

**(1*RS*,2*SR*,3*SR*)-3-(*N,N*-Dibenzylamino)methyl-cyclohexane-1,2-diol 88 (400 MHz,  $^1\text{H}$ ,  $\text{CDCl}_3$ )**

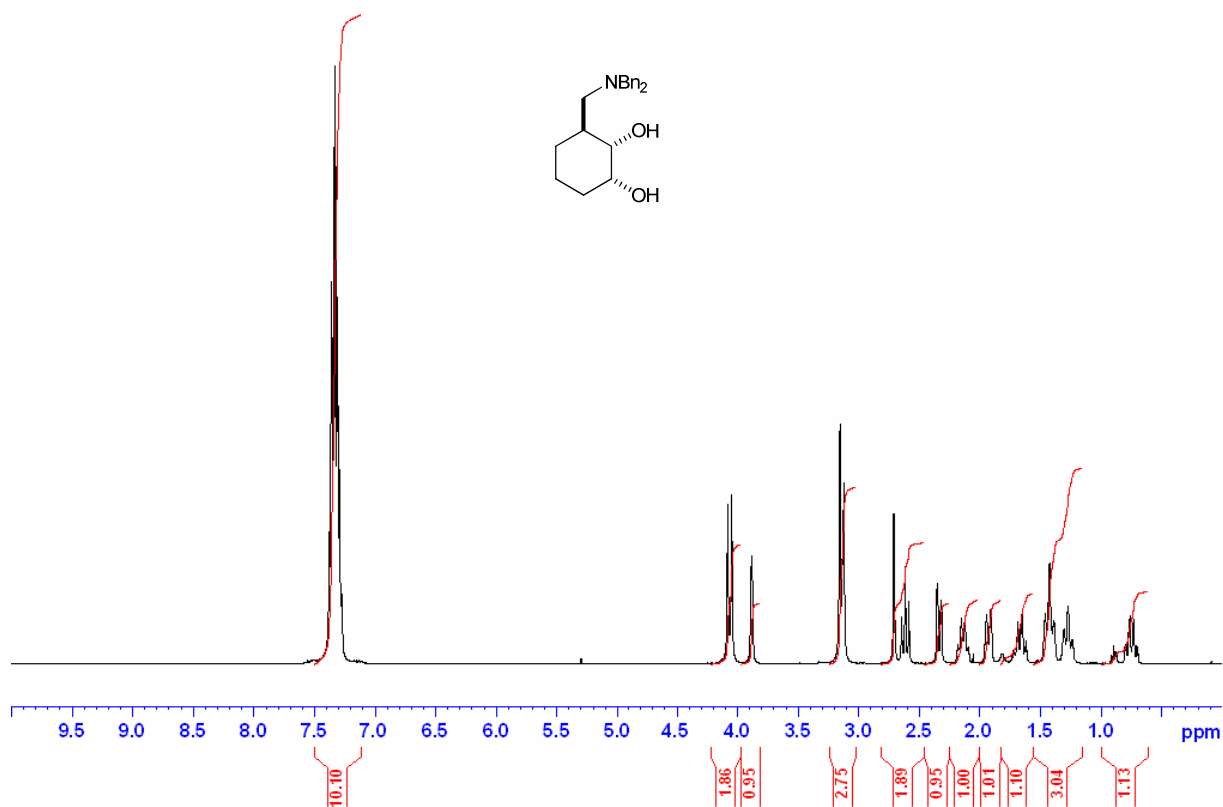

**(1*RS*,2*SR*,3*SR*)-3-(*N,N*-Dibenzylamino)methyl-cyclohexane-1,2-diol 88 (100 MHz,  $^{13}\text{C}$ ,  $\text{CDCl}_3$ )**

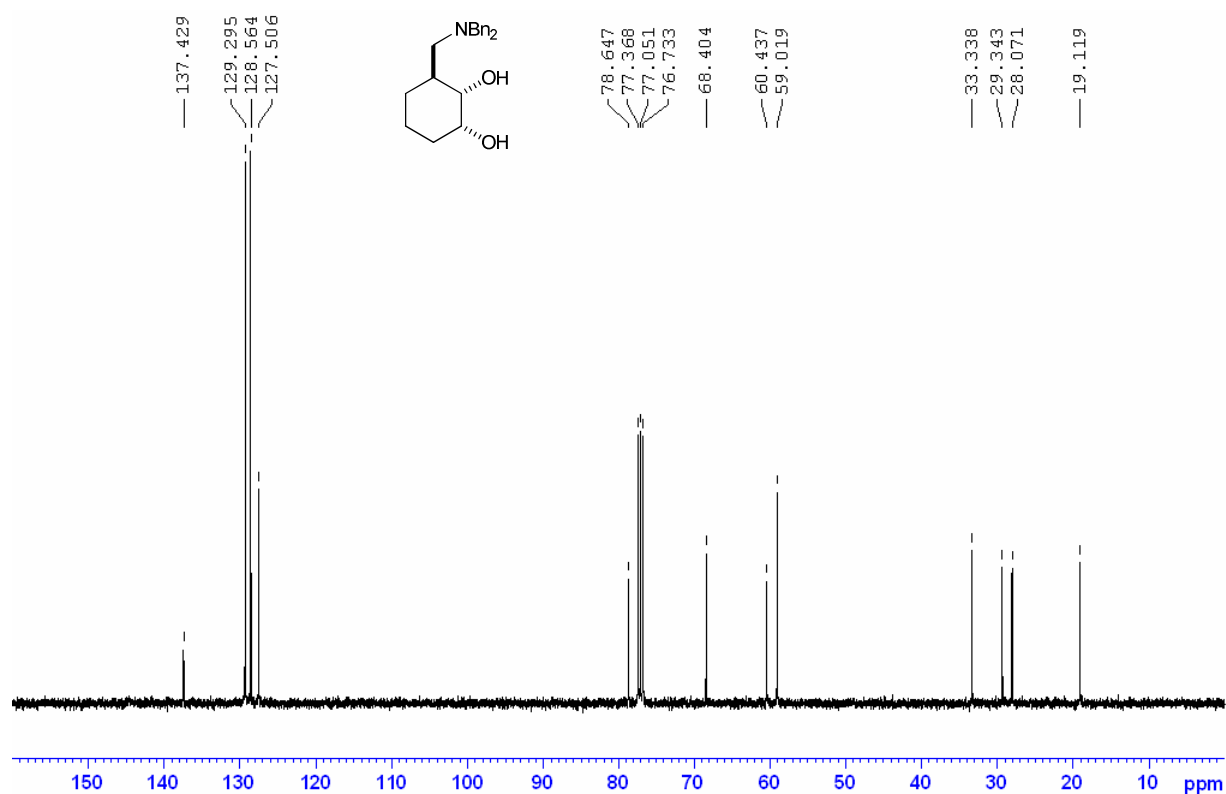

**(1*RS*,2*RS*,3*SR*)-1-(*p*-Toluenesulfonyloxy)-2-acetoxy-3-(*N,N*-dibenzylamino)methyl-cyclohexane 89**

**(400 MHz,  $^1\text{H}$ ,  $\text{CDCl}_3$ )**

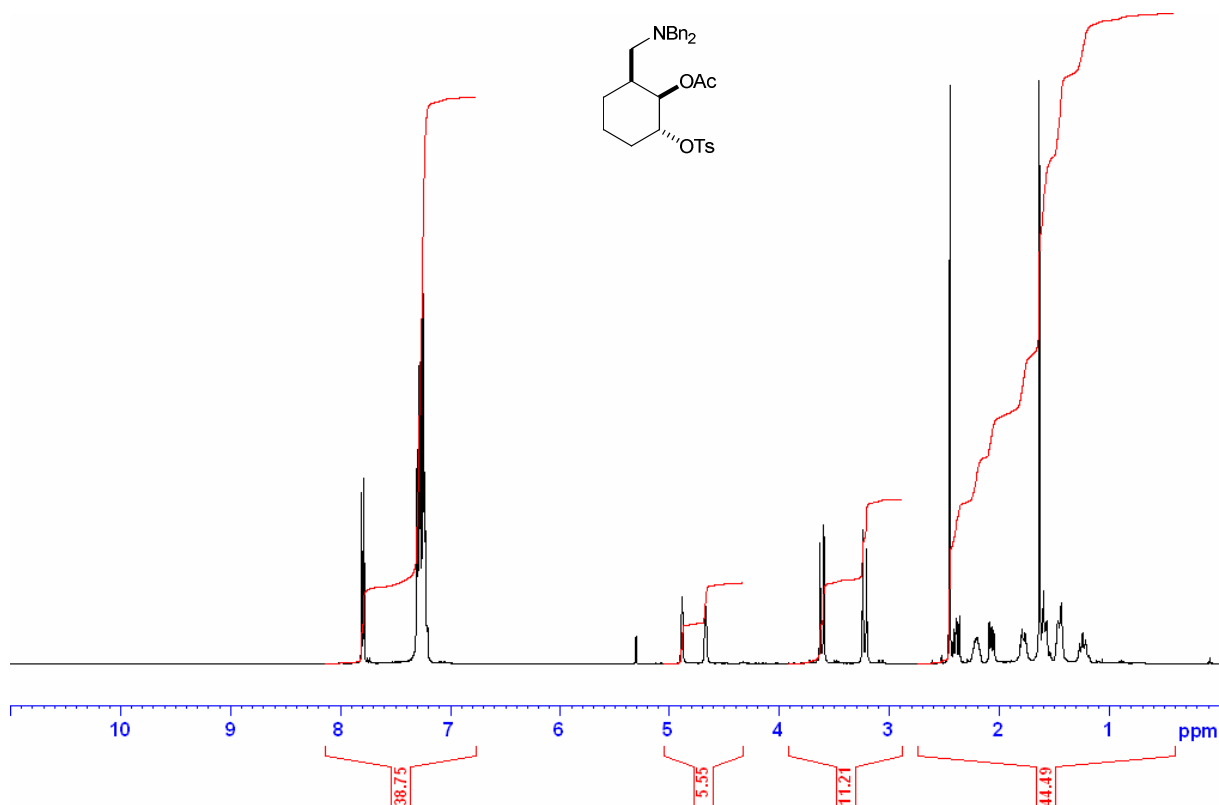

**(1*RS*,2*RS*,3*SR*)-1-(*p*-Toluenesulfonyloxy)-2-acetoxy-3-(*N,N*-dibenzylamino)methyl-cyclohexane 89**

**(100 MHz,  $^{13}\text{C}$ ,  $\text{CDCl}_3$ )**

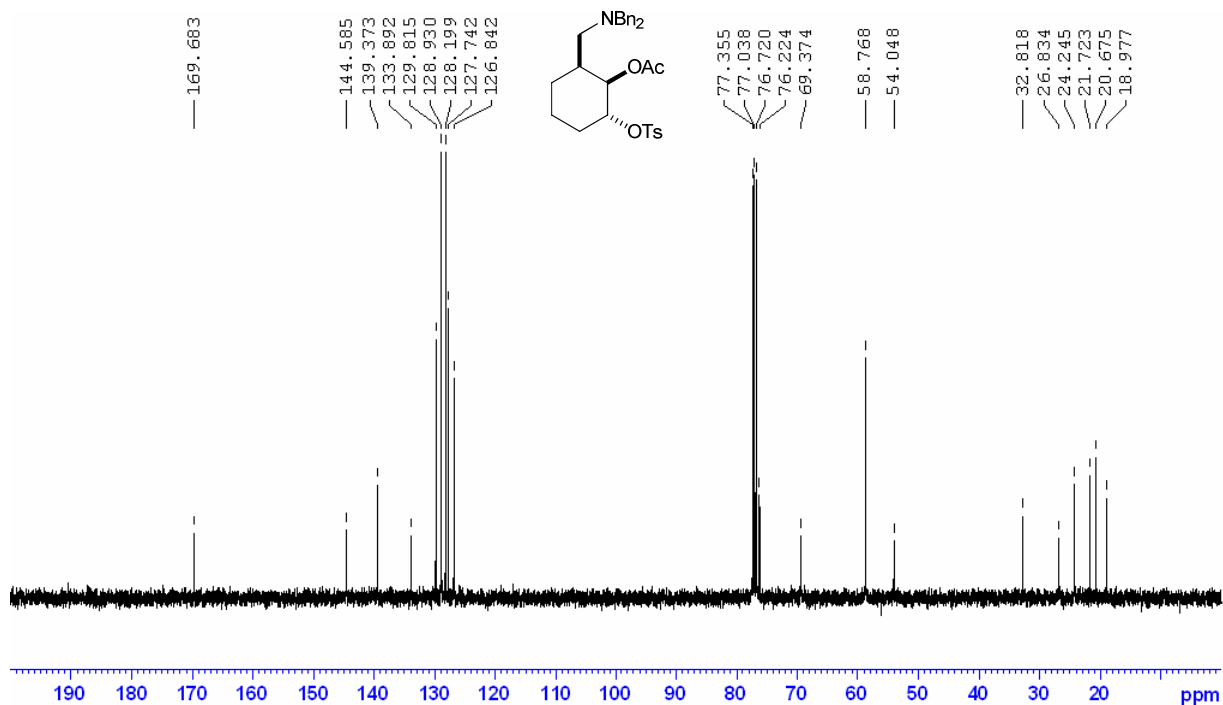

**(1*RS*,2*SR*,3*RS*)-3-(*N,N*-Dibenzylamino)methyl-cyclohexane-1,2-diol 92 (400 MHz,  $^1\text{H}$ ,  $\text{CDCl}_3$ )**

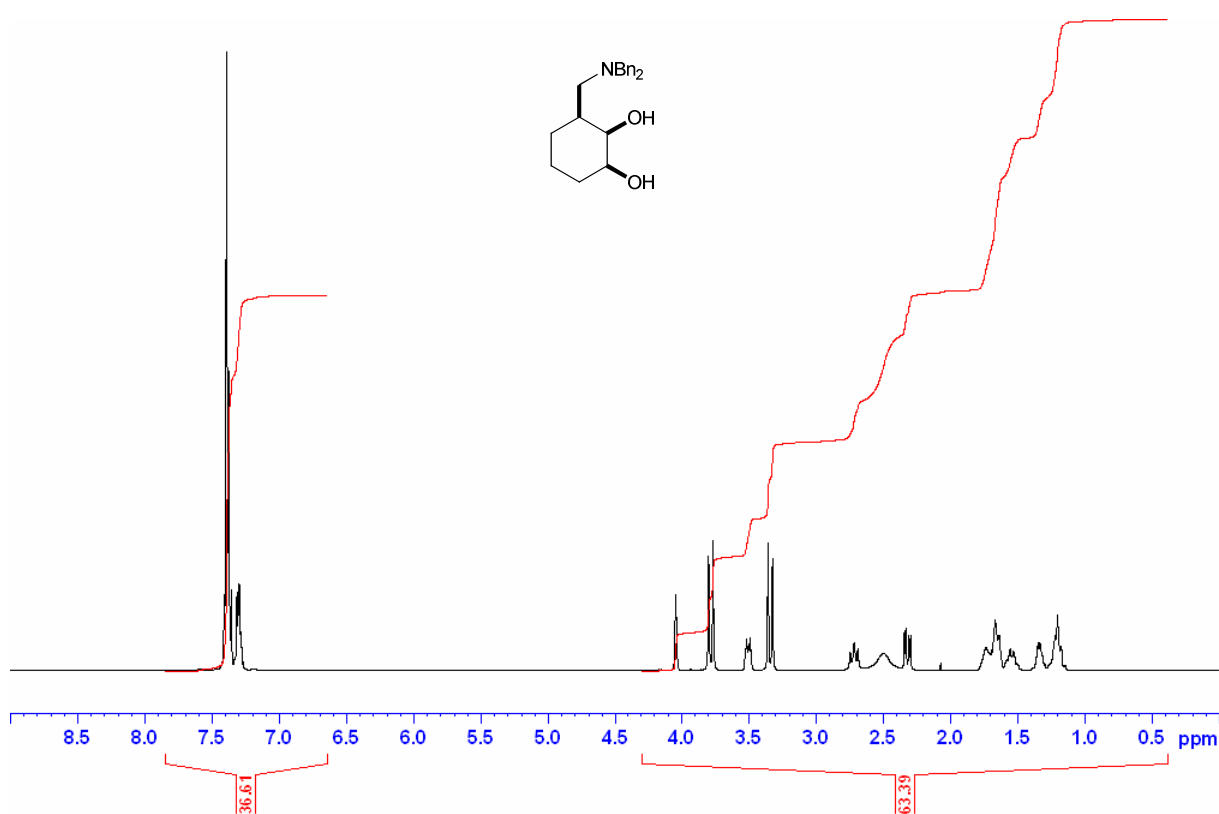

**(1*RS*,2*SR*,3*RS*)-3-(*N,N*-Dibenzylamino)methyl-cyclohexane-1,2-diol 92 (100 MHz,  $^{13}\text{C}$ ,  $\text{CDCl}_3$ )**

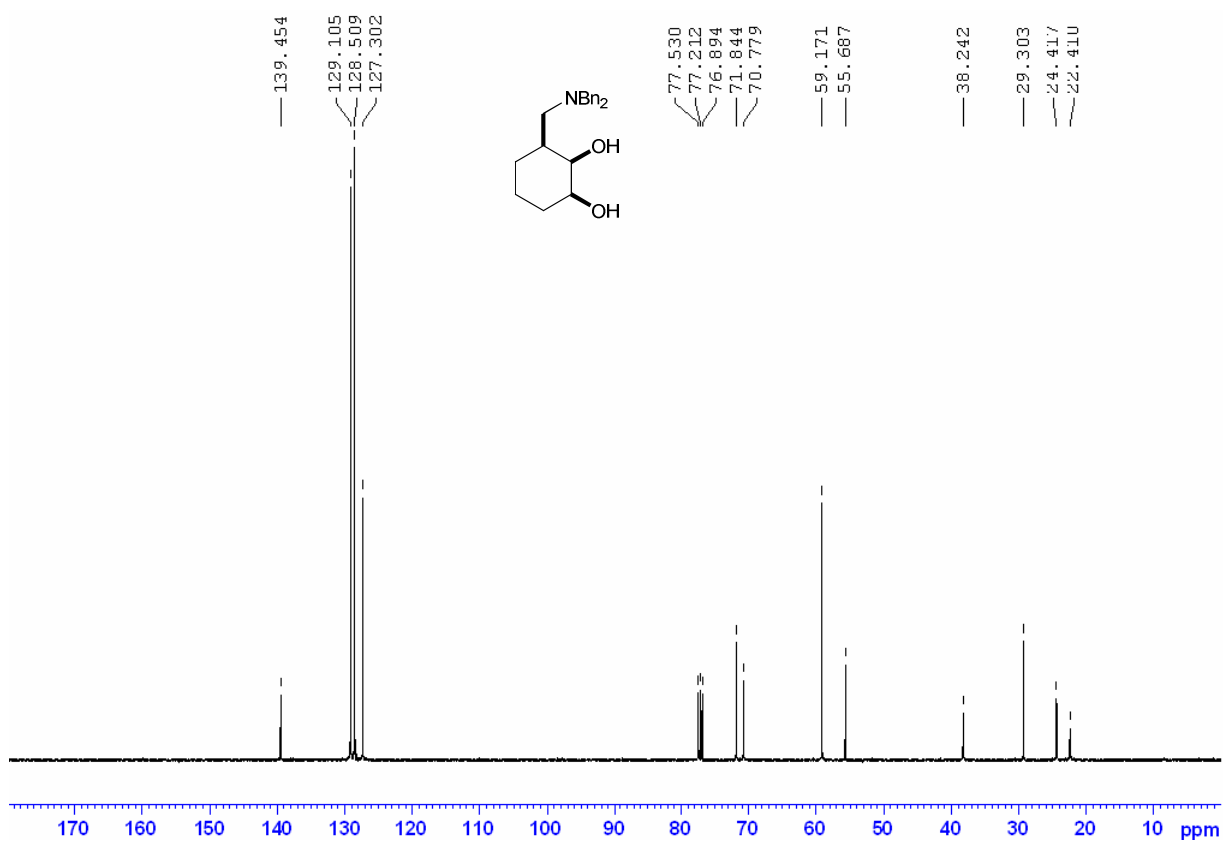

**(1*RS*,2*RS*,3*SR*)-3-Aminomethyl-cyclohexane-1,2-diol 93 (400 MHz, <sup>1</sup>H, CH<sub>3</sub>OD)**

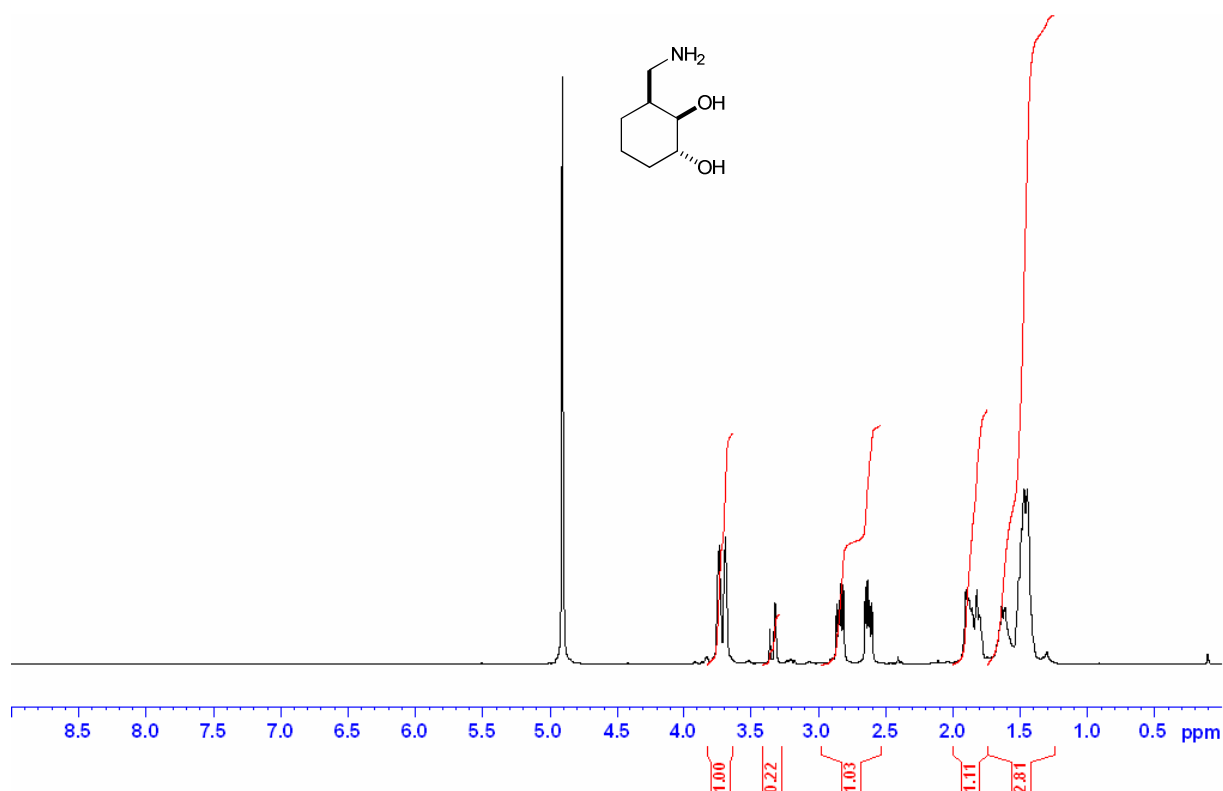

**(1*RS*,2*RS*,3*SR*)-3-Aminomethyl-cyclohexane-1,2-diol 93 (100 MHz, <sup>13</sup>C, CH<sub>3</sub>OD)**

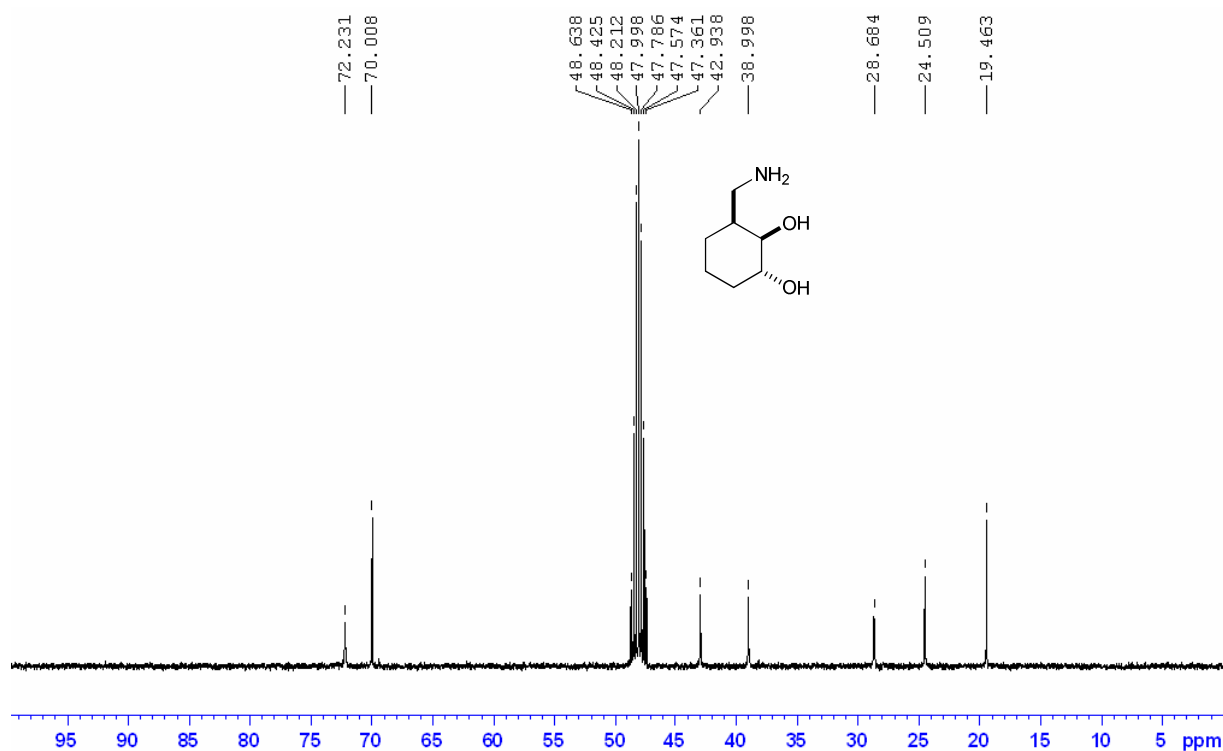



**(1*RS*,2*RS*,3*RS*)-3-Aminomethyl-cyclohexane-1,2-diol 94 (400 MHz, <sup>1</sup>H, CH<sub>3</sub>OD)**

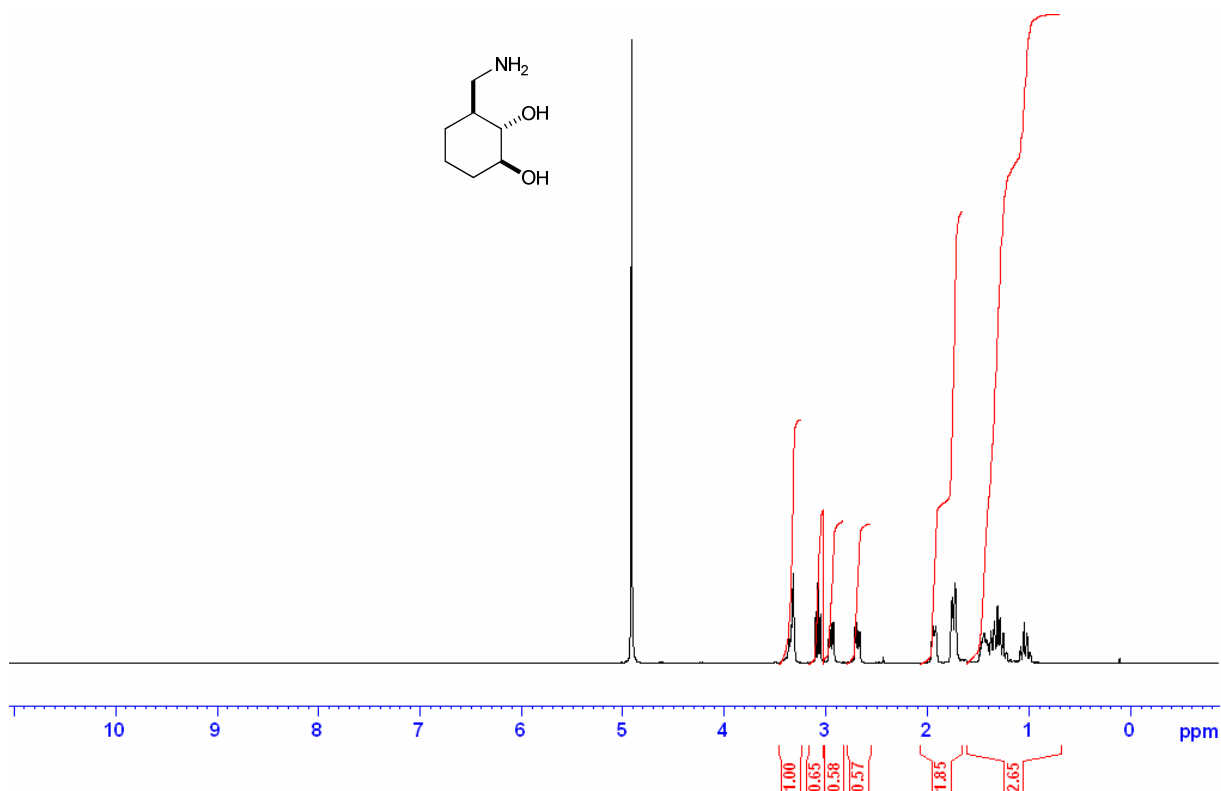

**(1*RS*,2*RS*,3*RS*)-3-Aminomethyl-cyclohexane-1,2-diol 94 (100 MHz, <sup>13</sup>C, CH<sub>3</sub>OD)**

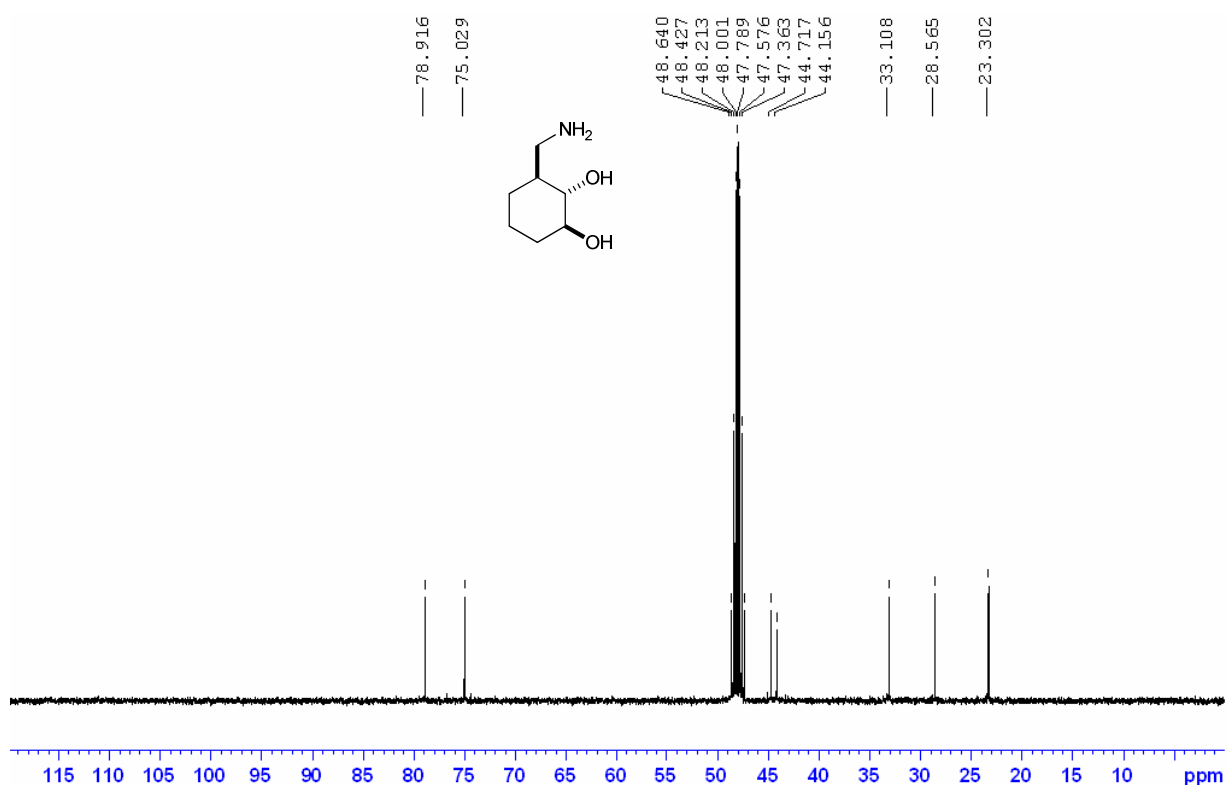

**(1*RS*,2*SR*,3*SR*)-3-Aminomethyl-cyclohexane-1,2-diol 95 (400 MHz,  $^1\text{H}$ ,  $\text{CH}_3\text{OD}$ )**

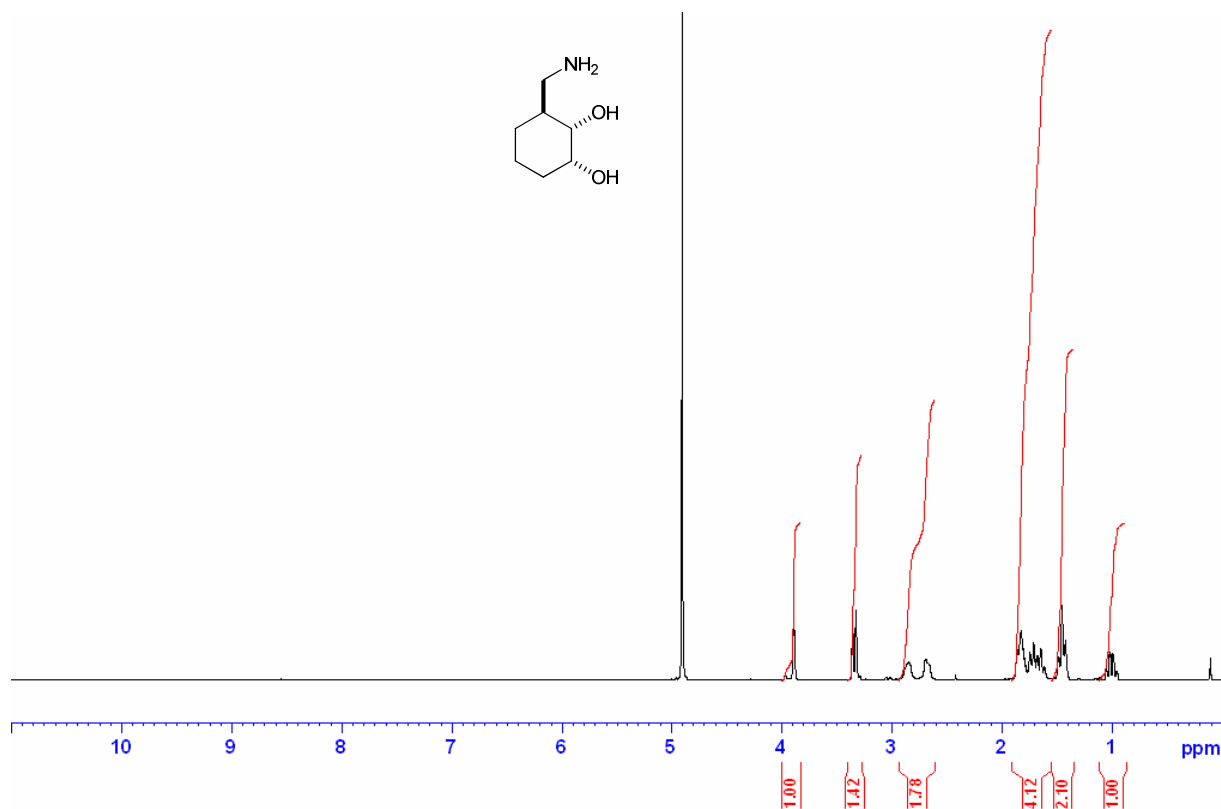

**(1*RS*,2*SR*,3*SR*)-3-Aminomethyl-cyclohexane-1,2-diol 95 (100 MHz,  $^{13}\text{C}$ ,  $\text{CH}_3\text{OD}$ )**

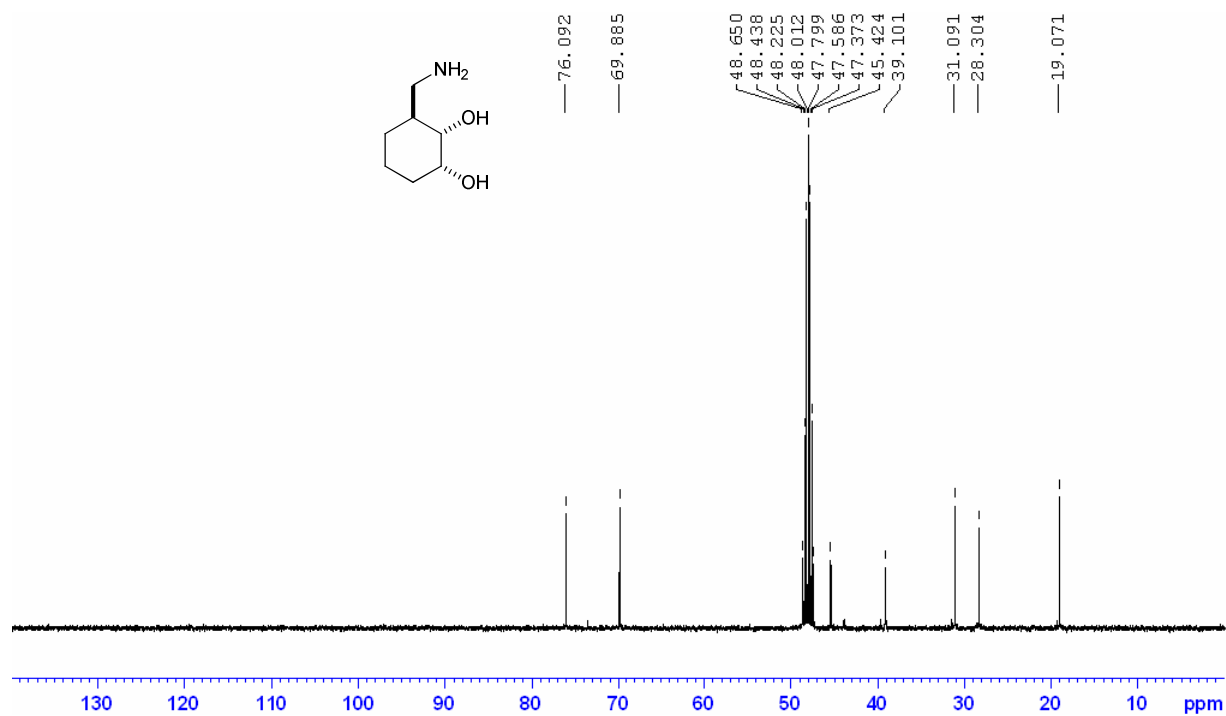

**(1*RS*,2*SR*,3*RS*)-3-Aminomethyl-cyclohexane-1,2-diol 96 (400 MHz,  $^1\text{H}$ ,  $\text{CH}_3\text{OD}$ )**

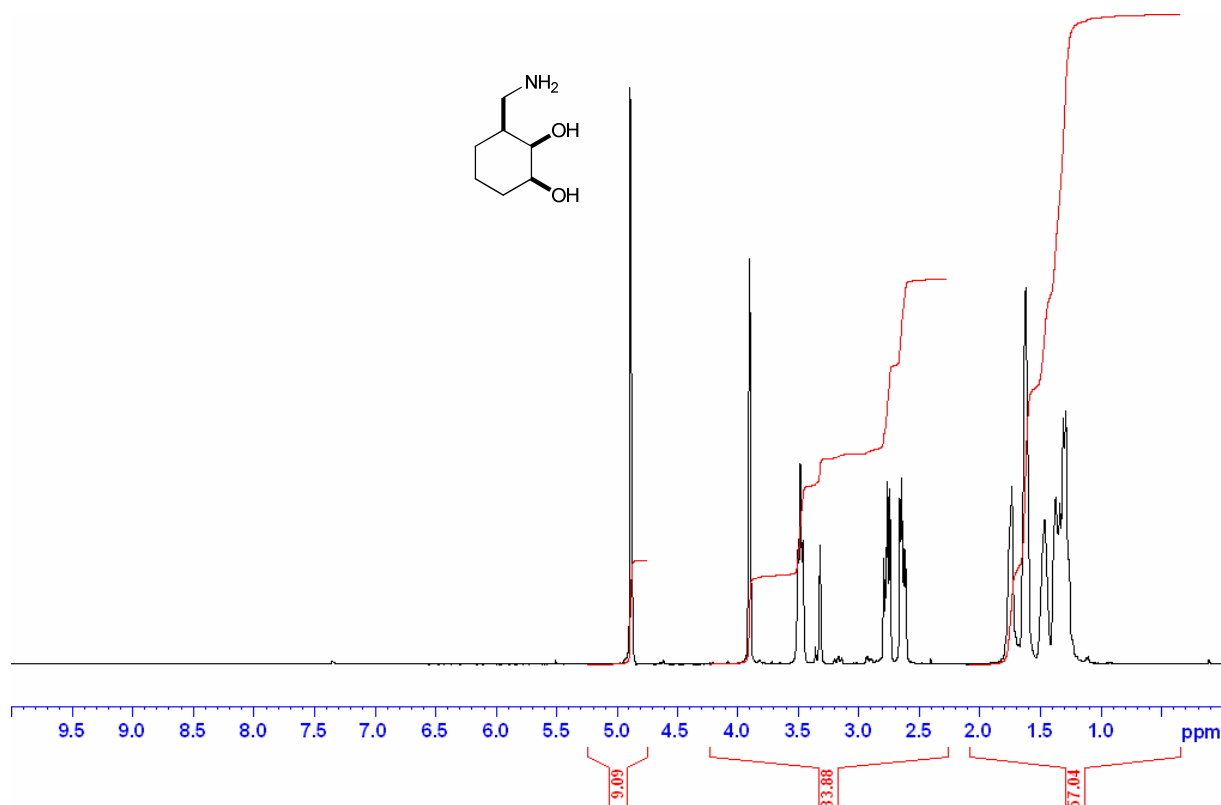

**(1*RS*,2*SR*,3*RS*)-3-Aminomethyl-cyclohexane-1,2-diol 96 (100 MHz,  $^{13}\text{C}$ ,  $\text{CH}_3\text{OD}$ )**

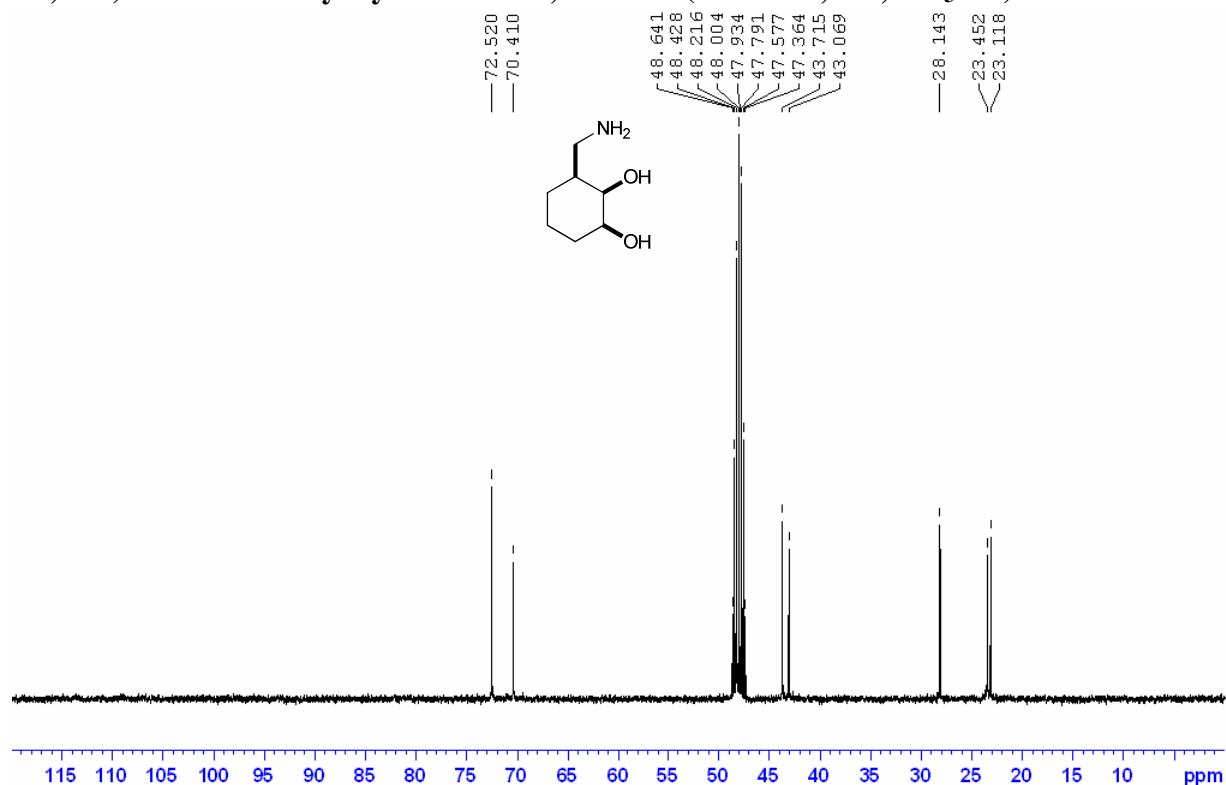

Supplement: Supplementary file 1 [file 4528024]
